# Supplementary material for: Genetic determinants of chromatin reveal prostate cancer risk mediated by context-dependent gene regulation
Source: bioRxiv preprint, doi:10.1101/2021.05.10.443466, version 1 (2021-05-11)
Supplement: Supplemental Tables 1-10 [file 443466_file02.xlsx]

## Sheet: Table S1
Table S1. Public datasets used in the study
Dataset	Data reference or link
Prostate Cancer ChIP-seq Data (GSE130408)	Pomerantz et al., Nature Genetics 2020
Prostate Cancer ChIP-seq Data (GSE120738)	Stelloo et al., Nature Communications 2018
Prostate Cancer RNA-seq data (GSE120741)	Stelloo et al., Nature Communications 2018
Prostate Cancer LuCaP ChIP-seq input control sequences (GSE161948)	Baca et al., Nature Communications 2021
Prostate cancer gwas used to perform CWAS	Schumacher et al., Nature Genetics 2018
All other publically available GWAS	https://www.ukbiobank.ac.uk/
LD reference data from 1000 Genomes	https://data.broadinstitute.org/alkesgroup/FUSION/LDREF.tar.bz2
LNCaP H3K27ac HiChIP Data	Giambartolomei et al., 2020 (https://www.biorxiv.org/content/10.1101/2020.10.23.352351v1)
ENCODE DNAse Hypersensitivity Data (hg19)	https://zenodo.org/record/3838751/files/DHS_Index_and_Vocabulary_hg19_WM20190703.txt.gz?download=1
ENCODE DNAse Hypersensitivity Data (hg38)	https://zenodo.org/record/3838751/files/DHS_Index_and_Vocabulary_hg38_WM20190703.txt.gz?download=1
GTEx eQTLs	https://console.cloud.google.com/storage/browser/gtex-resources
GTEX gene expression levels	https://storage.googleapis.com/gtex_analysis_v8/rna_seq_data/GTEx_Analysis_2017-06-05_v8_RNASeQCv1.1.9_gene_tpm.gct.gz
GTEX gene annotations	https://storage.googleapis.com/gtex_analysis_v8/reference/gencode.v26.GRCh38.genes.gtf
TWAS data	https://github.com/bogdanlab/prca_twas/blob/master/ONCOARRAY.TWAS.txt
Prostate cancer GWAS (for validation of novel loci identified by CWAS)	Conti et al., Nature Genetics 2021 (Table S4)
List of transcription factor genes	http://humantfs.ccbr.utoronto.ca/download/v_1.01/TFs_Ensembl_v_1.01.txt

## Sheet: Table S2
Table S2. Epigenomic dataset quality indicators
Cohort	Sample ID	Source Identifier	Peaks	Total reads	Mapped	Uniquely mapped	FRIP	Source Identifier
DFCI PRAD and prostate (Pomerantz et al, Nature Genetics 2020)	ATAC_2025-2_T	GSM4570091	48772	49280328	45476649	36828842	9.2	GSM4570091
DFCI PRAD and prostate (Pomerantz et al, Nature Genetics 2020)	ATAC_2038-6_T	GSM4570089	32585	33946667	32028299	25662590	6	GSM4570089
DFCI PRAD and prostate (Pomerantz et al, Nature Genetics 2020)	ATAC_2114-8_N	GSM4570084	38030	29702097	27711397	22297597	8.9	GSM4570084
DFCI PRAD and prostate (Pomerantz et al, Nature Genetics 2020)	ATAC_2114-8_T	GSM4570088	60232	24094121	21622115	17531531	16.7	GSM4570088
DFCI PRAD and prostate (Pomerantz et al, Nature Genetics 2020)	ATAC_2137-1_T	GSM4570090	47505	22911685	21631435	17476697	11.7	GSM4570090
DFCI PRAD and prostate (Pomerantz et al, Nature Genetics 2020)	ATAC_2137-4_N	GSM4570085	25324	4929485	4525958	3770477	13.7	GSM4570085
DFCI PRAD and prostate (Pomerantz et al, Nature Genetics 2020)	ATAC_2480-8_T	GSM4570093	57586	46227511	43707208	34943939	10.2	GSM4570093
DFCI PRAD and prostate (Pomerantz et al, Nature Genetics 2020)	ATAC_2484-7_N	GSM4570086	42923	20116596	17816632	14499879	12.8	GSM4570086
DFCI PRAD and prostate (Pomerantz et al, Nature Genetics 2020)	ATAC_2485-1_N	GSM4570087	50627	40703737	33551060	27262968	10.6	GSM4570087
DFCI PRAD and prostate (Pomerantz et al, Nature Genetics 2020)	ATAC_2485-1_T	GSM4570092	58105	19043810	17656348	14136142	30.5	GSM4570092
DFCI PRAD and prostate (Pomerantz et al, Nature Genetics 2020)	DF_AR_1239T	GSM4569835	24290	141037642	130329306	118332873	6.7	GSM4569835
DFCI PRAD and prostate (Pomerantz et al, Nature Genetics 2020)	DF_AR_1592T	GSM4569841	18583	79447061	75997937	69399315	4.1	GSM4569841
DFCI PRAD and prostate (Pomerantz et al, Nature Genetics 2020)	DF_AR_1636T	GSM4569836	19478	50537556	49365087	45829224	4.4	GSM4569836
DFCI PRAD and prostate (Pomerantz et al, Nature Genetics 2020)	DF_AR_1730T	GSM4569837	29667	62720836	59770287	55156898	5.7	GSM4569837
DFCI PRAD and prostate (Pomerantz et al, Nature Genetics 2020)	DF_AR_1798T	GSM4569838	34170	60073362	57504641	53139352	6.9	GSM4569838
DFCI PRAD and prostate (Pomerantz et al, Nature Genetics 2020)	DF_AR_1816T	GSM4569839	56732	62924320	61665811	56971759	9.4	GSM4569839
DFCI PRAD and prostate (Pomerantz et al, Nature Genetics 2020)	DF_AR_1853T	GSM4569840	14154	57508541	55457682	50968946	3.8	GSM4569840
DFCI PRAD and prostate (Pomerantz et al, Nature Genetics 2020)	DF_AR_2752T	GSM4569842	37367	102217382	102211709	101445091	5.1	GSM4569842
DFCI PRAD and prostate (Pomerantz et al, Nature Genetics 2020)	DF_AR_2815T	GSM4569843	38706	41659438	40752524	37652652	9.1	GSM4569843
DFCI PRAD and prostate (Pomerantz et al, Nature Genetics 2020)	DF_AR_4024T	GSM4569844	44229	53846558	53844469	53459222	8.7	GSM4569844
DFCI PRAD and prostate (Pomerantz et al, Nature Genetics 2020)	DF_H3K27me3_2228N	GSM4570076	192165	28080160	28079957	27752084	17.1	GSM4570076
DFCI PRAD and prostate (Pomerantz et al, Nature Genetics 2020)	DF_H3K27me3_2228T	GSM4570082	78448	36963054	35732865	30821244	31.5	GSM4570082
DFCI PRAD and prostate (Pomerantz et al, Nature Genetics 2020)	FOXA1_2030_N	GSM4569872	22892	28070737	27616673	25539144	5.2	GSM4569872
DFCI PRAD and prostate (Pomerantz et al, Nature Genetics 2020)	FOXA1_2030_T	GSM4569891	57140	26297323	25870007	24072843	13.9	GSM4569891
DFCI PRAD and prostate (Pomerantz et al, Nature Genetics 2020)	FOXA1_2078_N	GSM4569868	14820	13274023	13046717	12043499	4.7	GSM4569868
DFCI PRAD and prostate (Pomerantz et al, Nature Genetics 2020)	FOXA1_2078_T	GSM4569890	35615	11422431	11305823	10514585	11	GSM4569890
DFCI PRAD and prostate (Pomerantz et al, Nature Genetics 2020)	FOXA1_2480_N	GSM4569869	54375	34610273	34043348	31726450	10.5	GSM4569869
DFCI PRAD and prostate (Pomerantz et al, Nature Genetics 2020)	FOXA1_2480_T	GSM4569894	80997	29706123	29445121	27383577	17	GSM4569894
DFCI PRAD and prostate (Pomerantz et al, Nature Genetics 2020)	FOXA1_2483_T	GSM4569892	34676	38073147	37617533	34864068	5.5	GSM4569892
DFCI PRAD and prostate (Pomerantz et al, Nature Genetics 2020)	FOXA1_2484_T	GSM4569893	9504	42849420	42310535	38824571	2.9	GSM4569893
DFCI PRAD and prostate (Pomerantz et al, Nature Genetics 2020)	H3K27ac_1962-2_N	GSM4569995	30430	23274771	22990861	21397626	12.5	GSM4569995
DFCI PRAD and prostate (Pomerantz et al, Nature Genetics 2020)	H3k27ac_1962-7_T	GSM4570021	28518	10753658	10563862	10033971	19.6	GSM4570021
DFCI PRAD and prostate (Pomerantz et al, Nature Genetics 2020)	H3K27ac_2007_N	GSM4569960	35782	34610411	34008687	31457288	11.2	GSM4569960
DFCI PRAD and prostate (Pomerantz et al, Nature Genetics 2020)	H3k27ac_2025-2_T	GSM4570016	19551	11979197	11839364	11036090	7.5	GSM4570016
DFCI PRAD and prostate (Pomerantz et al, Nature Genetics 2020)	H3K27ac_2025-5_N	GSM4569978	41930	19984432	19749174	18683158	18.7	GSM4569978
DFCI PRAD and prostate (Pomerantz et al, Nature Genetics 2020)	H3K27ac_2030_N_B	GSM4569958	62959	44212027	43720817	41279939	21.3	GSM4569958
DFCI PRAD and prostate (Pomerantz et al, Nature Genetics 2020)	H3K27ac_2030_T_B	GSM4570009	57712	35120478	34830000	33231573	39.9	GSM4570009
DFCI PRAD and prostate (Pomerantz et al, Nature Genetics 2020)	H3k27ac_2038-6_T	GSM4570017	17641	12473473	12346805	11480724	7.3	GSM4570017
DFCI PRAD and prostate (Pomerantz et al, Nature Genetics 2020)	H3K27ac_2038-7_N	GSM4569984	23227	19394019	19132480	17874708	9.8	GSM4569984
DFCI PRAD and prostate (Pomerantz et al, Nature Genetics 2020)	H3k27ac_2060-7_T	GSM4570013	22029	8999603	8903016	8372114	10.9	GSM4570013
DFCI PRAD and prostate (Pomerantz et al, Nature Genetics 2020)	H3K27ac_2060_N_A	GSM4569966	84301	74486521	73320059	69054820	22.3	GSM4569966
DFCI PRAD and prostate (Pomerantz et al, Nature Genetics 2020)	H3K27ac_2076_N_A	GSM4569959	38994	47389647	46903925	43710750	11.2	GSM4569959
DFCI PRAD and prostate (Pomerantz et al, Nature Genetics 2020)	H3K27ac_2076_T	GSM4570011	42502	37698963	37395300	34889769	15.3	GSM4570011
DFCI PRAD and prostate (Pomerantz et al, Nature Genetics 2020)	H3K27ac_2078_N	GSM4569964	52121	41880410	41471493	38943268	18.9	GSM4569964
DFCI PRAD and prostate (Pomerantz et al, Nature Genetics 2020)	H3K27ac_2078_T_A	GSM4570010	55697	37576078	37283268	35275638	31.8	GSM4570010
DFCI PRAD and prostate (Pomerantz et al, Nature Genetics 2020)	H3K27ac_2079_N_A	GSM4569969	57221	43362409	42714591	39952479	16.9	GSM4569969
DFCI PRAD and prostate (Pomerantz et al, Nature Genetics 2020)	H3k27ac_2087-6_T	GSM4570014	12624	8721629	8626733	8021329	5.5	GSM4570014
DFCI PRAD and prostate (Pomerantz et al, Nature Genetics 2020)	H3K27ac_2087_N_A	GSM4569973	60010	60074214	59148339	55166454	15.9	GSM4569973
DFCI PRAD and prostate (Pomerantz et al, Nature Genetics 2020)	H3K27ac_2088-1_N	GSM4569997	17588	26400416	26074637	23995692	5.5	GSM4569997
DFCI PRAD and prostate (Pomerantz et al, Nature Genetics 2020)	H3k27ac_2088-2_T	GSM4570024	12007	10405701	10289421	9513622	5.5	GSM4570024
DFCI PRAD and prostate (Pomerantz et al, Nature Genetics 2020)	H3K27ac_2101-1_N	GSM4569996	34609	20130999	19854204	18655644	15.2	GSM4569996
DFCI PRAD and prostate (Pomerantz et al, Nature Genetics 2020)	H3k27ac_2101-2_T	GSM4570022	16725	8043379	7946775	7452641	8.9	GSM4570022
DFCI PRAD and prostate (Pomerantz et al, Nature Genetics 2020)	H3K27ac_2113-2_N	GSM4569976	31784	31825634	31407829	29235684	11.1	GSM4569976
DFCI PRAD and prostate (Pomerantz et al, Nature Genetics 2020)	H3k27ac_2113-8_T	GSM4570015	17774	12552363	12414363	11511644	8	GSM4570015
DFCI PRAD and prostate (Pomerantz et al, Nature Genetics 2020)	H3K27ac_2114-2_N	GSM4569994	31138	19492391	19233208	18003680	13.6	GSM4569994
DFCI PRAD and prostate (Pomerantz et al, Nature Genetics 2020)	H3k27ac_2114-8_T	GSM4570020	33338	15971845	15817824	14755045	12.6	GSM4570020
DFCI PRAD and prostate (Pomerantz et al, Nature Genetics 2020)	H3k27ac_2137-1_T	GSM4570025	26969	12703794	12551829	11747043	12.4	GSM4570025
DFCI PRAD and prostate (Pomerantz et al, Nature Genetics 2020)	H3K27ac_2137-4_N	GSM4569981	69943	30717952	30272009	28827477	31.6	GSM4569981
DFCI PRAD and prostate (Pomerantz et al, Nature Genetics 2020)	H3K27ac_2173-5_N	GSM4569993	28534	18324705	18088023	16858766	13.4	GSM4569993
DFCI PRAD and prostate (Pomerantz et al, Nature Genetics 2020)	H3k27ac_2173-6_T	GSM4570023	29296	10811534	10689418	10094243	17.5	GSM4570023
DFCI PRAD and prostate (Pomerantz et al, Nature Genetics 2020)	H3K27ac_2185-4_N	GSM4569990	31088	25152600	24840230	23059726	12.6	GSM4569990
DFCI PRAD and prostate (Pomerantz et al, Nature Genetics 2020)	H3k27ac_2185-5_T	GSM4570019	33973	10476815	10379681	9792147	14.9	GSM4570019
DFCI PRAD and prostate (Pomerantz et al, Nature Genetics 2020)	H3K27ac_2192-3_N	GSM4569987	50434	25882006	25562785	24147499	22.5	GSM4569987
DFCI PRAD and prostate (Pomerantz et al, Nature Genetics 2020)	H3k27ac_2192-5_T	GSM4570018	24829	10900441	10773070	10209737	12.9	GSM4570018
DFCI PRAD and prostate (Pomerantz et al, Nature Genetics 2020)	H3K27ac_2208_T	NONE	41308	23245505	22794757	21476930	20.8	NONE
DFCI PRAD and prostate (Pomerantz et al, Nature Genetics 2020)	H3K27ac_2228_N	GSM4569961	127032	273940899	268691615	253032431	27.8	GSM4569961
DFCI PRAD and prostate (Pomerantz et al, Nature Genetics 2020)	H3K27ac_2228_T	GSM4570012	42560	24146764	23807223	22447612	18	GSM4570012
DFCI PRAD and prostate (Pomerantz et al, Nature Genetics 2020)	H3K27ac_2319_N_B	GSM4569957	65107	41264035	40855018	38660448	23.7	GSM4569957
DFCI PRAD and prostate (Pomerantz et al, Nature Genetics 2020)	H3K27ac_2319_T_B	GSM4570008	44641	20551868	20392460	19359907	29.4	GSM4570008
DFCI PRAD and prostate (Pomerantz et al, Nature Genetics 2020)	H3K27ac_2342_N	GSM4569962	98587	165615969	162588512	151719985	19.3	GSM4569962
DFCI PRAD and prostate (Pomerantz et al, Nature Genetics 2020)	H3K27ac_2477_N	GSM4569955	40967	28680068	28397122	26629761	14.5	GSM4569955
DFCI PRAD and prostate (Pomerantz et al, Nature Genetics 2020)	H3K27ac_2477_T	GSM4570026	40043	20474488	20193648	18969112	18.7	GSM4570026
DFCI PRAD and prostate (Pomerantz et al, Nature Genetics 2020)	H3K27ac_2478_N	GSM4569954	60093	62035868	61244618	57450748	20.9	GSM4569954
DFCI PRAD and prostate (Pomerantz et al, Nature Genetics 2020)	H3K27ac_2478_T	GSM4570027	23591	27237659	26972562	24825058	7.4	GSM4570027
DFCI PRAD and prostate (Pomerantz et al, Nature Genetics 2020)	H3K27ac_2479_N	GSM4569952	55180	47650041	47260046	44529189	25.1	GSM4569952
DFCI PRAD and prostate (Pomerantz et al, Nature Genetics 2020)	H3K27ac_2479_T	GSM4570028	60166	39101936	38806437	36493316	27.6	GSM4570028
DFCI PRAD and prostate (Pomerantz et al, Nature Genetics 2020)	H3K27ac_2480_N	GSM4569953	33308	28380830	28075165	26111608	12.3	GSM4569953
DFCI PRAD and prostate (Pomerantz et al, Nature Genetics 2020)	H3K27ac_2480_T	GSM4570031	24735	29892452	29621764	27149494	8	GSM4570031
DFCI PRAD and prostate (Pomerantz et al, Nature Genetics 2020)	H3K27ac_2482_N	GSM4569956	49596	30330332	30024067	28296413	20.5	GSM4569956
DFCI PRAD and prostate (Pomerantz et al, Nature Genetics 2020)	H3K27ac_2482_T	GSM4570029	34954	27348424	26943043	25038739	13.8	GSM4570029
DFCI PRAD and prostate (Pomerantz et al, Nature Genetics 2020)	H3K27ac_2483-1_N	GSM4569998	34198	18367863	18144027	17041896	15.1	GSM4569998
DFCI PRAD and prostate (Pomerantz et al, Nature Genetics 2020)	H3k27ac_2484-4_T	GSM4570030	19694	10992105	10897035	10187356	7.9	GSM4570030
DFCI PRAD and prostate (Pomerantz et al, Nature Genetics 2020)	H3K27ac_2484-8_N	GSM4569999	44821	18444753	18212731	17251523	23.3	GSM4569999
DFCI PRAD and prostate (Pomerantz et al, Nature Genetics 2020)	H3K27me3_1726_T_A	GSM4570078	251028	44477076	43406962	38752760	25.9	GSM4570078
DFCI PRAD and prostate (Pomerantz et al, Nature Genetics 2020)	H3K27me3_1752_T_A	GSM4570079	316856	63474379	62274550	55252471	34.5	GSM4570079
DFCI PRAD and prostate (Pomerantz et al, Nature Genetics 2020)	H3K27me3_1820_T	GSM4570083	116756	50278067	49281924	44209641	16	GSM4570083
DFCI PRAD and prostate (Pomerantz et al, Nature Genetics 2020)	H3K27me3_1944_T	GSM4570077	42856	43249287	42604784	38411002	5.5	GSM4570077
DFCI PRAD and prostate (Pomerantz et al, Nature Genetics 2020)	H3K27me3_2208_N	GSM4570075	99686	32520931	32058166	29032881	12.1	GSM4570075
DFCI PRAD and prostate (Pomerantz et al, Nature Genetics 2020)	H3K27me3_2208_T	GSM4570081	118600	34142780	33649213	30249355	14.9	GSM4570081
DFCI PRAD and prostate (Pomerantz et al, Nature Genetics 2020)	H3K27me3_2319_N	GSM4570074	166977	58173076	55337058	45545712	17.2	GSM4570074
DFCI PRAD and prostate (Pomerantz et al, Nature Genetics 2020)	H3K27me3_2319_T	GSM4570080	93447	40675780	39817159	33414568	12	GSM4570080
DFCI PRAD and prostate (Pomerantz et al, Nature Genetics 2020)	H3K27me3_Anon_N	GSM4570073	239892	88480078	86573679	71126536	19.2	GSM4570073
DFCI PRAD and prostate (Pomerantz et al, Nature Genetics 2020)	H3K4me3_1734_T_B	GSM4570071	38442	43632479	43030543	41069693	69	GSM4570071
DFCI PRAD and prostate (Pomerantz et al, Nature Genetics 2020)	H3K4me3_1820_N	GSM4570063	35487	61865916	61083273	58561375	79.3	GSM4570063
DFCI PRAD and prostate (Pomerantz et al, Nature Genetics 2020)	H3K4me3_1820_T	GSM4570072	31526	50851830	50136769	48344395	84.3	GSM4570072
DFCI PRAD and prostate (Pomerantz et al, Nature Genetics 2020)	H3K4me3_1880_T_A	GSM4570066	37002	51628816	50775724	48787109	79	GSM4570066
DFCI PRAD and prostate (Pomerantz et al, Nature Genetics 2020)	H3K4me3_2208_N	GSM4570065	31788	34994579	32229917	29260795	37.6	GSM4570065
DFCI PRAD and prostate (Pomerantz et al, Nature Genetics 2020)	H3K4me3_2208_T	GSM4570069	36814	42024423	41546683	39965594	82.9	GSM4570069
DFCI PRAD and prostate (Pomerantz et al, Nature Genetics 2020)	H3K4me3_2228_T	GSM4570070	28951	35868481	34540783	31965546	55.9	GSM4570070
DFCI PRAD and prostate (Pomerantz et al, Nature Genetics 2020)	H3K4me3_2319_N	GSM4570064	29302	43609744	42862495	40676730	77.1	GSM4570064
DFCI PRAD and prostate (Pomerantz et al, Nature Genetics 2020)	H3K4me3_2319_T	GSM4570067	34222	47075452	42381206	38185720	42.2	GSM4570067
DFCI PRAD and prostate (Pomerantz et al, Nature Genetics 2020)	H3K4me3_2342_T	GSM4570068	32207	37233663	34299319	30290792	33.2	GSM4570068
DFCI PRAD and prostate (Pomerantz et al, Nature Genetics 2020)	HOXB13_2030_N	GSM4569914	26283	25369159	25052163	23297468	6	GSM4569914
DFCI PRAD and prostate (Pomerantz et al, Nature Genetics 2020)	HOXB13_2030_T	GSM4569925	52108	22428618	22063469	20558610	13.2	GSM4569925
DFCI PRAD and prostate (Pomerantz et al, Nature Genetics 2020)	HOXB13_2078_N	GSM4569910	25372	11839936	11591748	10733161	7.7	GSM4569910
DFCI PRAD and prostate (Pomerantz et al, Nature Genetics 2020)	HOXB13_2078_T	GSM4569924	40231	10575066	10480431	9792096	13.1	GSM4569924
DFCI PRAD and prostate (Pomerantz et al, Nature Genetics 2020)	HOXB13_2480_N	GSM4569911	20418	9833505	9682647	9022910	5.8	GSM4569911
DFCI PRAD and prostate (Pomerantz et al, Nature Genetics 2020)	HOXB13_2480_T	GSM4569928	41973	19675022	19518919	18047673	9.5	GSM4569928
DFCI PRAD and prostate (Pomerantz et al, Nature Genetics 2020)	HOXB13_2483_N	GSM4569912	46398	45767212	44965582	41470685	7.7	GSM4569912
DFCI PRAD and prostate (Pomerantz et al, Nature Genetics 2020)	HOXB13_2483_T	GSM4569926	58774	59092978	58323731	54035737	7.3	GSM4569926
DFCI PRAD and prostate (Pomerantz et al, Nature Genetics 2020)	HOXB13_2484_N	GSM4569913	67300	32054762	31509362	29357523	12.7	GSM4569913
DFCI PRAD and prostate (Pomerantz et al, Nature Genetics 2020)	HOXB13_2484_T	GSM4569927	51031	73923315	72936593	67133015	6.4	GSM4569927
DFCI PRAD and prostate (Pomerantz et al, Nature Genetics 2020)	K4me2_2078_N	GSM4570058	72450	24139479	23752232	22521098	62.1	GSM4570058
DFCI PRAD and prostate (Pomerantz et al, Nature Genetics 2020)	K4me2_2208_N	GSM4570055	66661	23730468	22755422	20450511	32.9	GSM4570055
DFCI PRAD and prostate (Pomerantz et al, Nature Genetics 2020)	K4me2_2208_T	GSM4570059	41094	28709703	28113181	26421729	74.5	GSM4570059
DFCI PRAD and prostate (Pomerantz et al, Nature Genetics 2020)	K4me2_2228_N	GSM4570056	54071	9268255	9131581	8618701	45.2	GSM4570056
DFCI PRAD and prostate (Pomerantz et al, Nature Genetics 2020)	K4me2_2228_T	GSM4570060	42719	25155071	24276300	21969704	16.4	GSM4570060
DFCI PRAD and prostate (Pomerantz et al, Nature Genetics 2020)	K4me2_2342_N	GSM4570057	73115	26211180	25840465	24553102	65.1	GSM4570057
DFCI PRAD and prostate (Pomerantz et al, Nature Genetics 2020)	K4me2_2342_T	GSM4570061	83869	25228875	24838298	23490036	60.3	GSM4570061
NKI PRAD and prostate (Pomerantz et al., Nature Genetics 2020)	NKI_13_AR_Healthy	NONE	1577	22782045	22082903	19885185	2.3	NONE
NKI PRAD and prostate (Pomerantz et al., Nature Genetics 2020)	NKI_13_AR_Tumor	NONE	14113	21814502	21448658	19565782	3.6	NONE
NKI PRAD and prostate (Pomerantz et al., Nature Genetics 2020)	NKI_13_FOXA1_Healthy	NONE	4743	25222246	24613816	22163648	2.6	NONE
NKI PRAD and prostate (Pomerantz et al., Nature Genetics 2020)	NKI_13_FOXA1_Tumor	NONE	27584	22699732	22332019	20315628	5.8	NONE
NKI PRAD and prostate (Pomerantz et al., Nature Genetics 2020)	NKI_13_H3K27AC_Healthy	NONE	10006	32051739	31773201	29635348	2.4	NONE
NKI PRAD and prostate (Pomerantz et al., Nature Genetics 2020)	NKI_13_H3K27AC_Tumor	NONE	22412	26743845	26539415	24890716	4.7	NONE
NKI PRAD and prostate (Pomerantz et al., Nature Genetics 2020)	NKI_13_HOXB13_Healthy	NONE	21874	30097361	28415508	25828587	4.8	NONE
NKI PRAD and prostate (Pomerantz et al., Nature Genetics 2020)	NKI_13_HOXB13_Tumor	NONE	53517	22014406	21313069	19639742	12.9	NONE
NKI PRAD and prostate (Pomerantz et al., Nature Genetics 2020)	NKI_19_AR_Healthy	NONE	3491	24622258	23606229	21447668	2	NONE
NKI PRAD and prostate (Pomerantz et al., Nature Genetics 2020)	NKI_19_AR_Tumor	NONE	5105	21543002	20777465	18803194	2.4	NONE
NKI PRAD and prostate (Pomerantz et al., Nature Genetics 2020)	NKI_19_FOXA1_Healthy	NONE	15878	29065258	27320006	24586555	4.1	NONE
NKI PRAD and prostate (Pomerantz et al., Nature Genetics 2020)	NKI_19_FOXA1_Tumor	NONE	17551	24271188	22576659	20401202	4.2	NONE
NKI PRAD and prostate (Pomerantz et al., Nature Genetics 2020)	NKI_19_H3K27AC_Healthy	NONE	4248	19600767	19467817	18229935	1.5	NONE
NKI PRAD and prostate (Pomerantz et al., Nature Genetics 2020)	NKI_19_H3K27AC_Tumor	NONE	3213	27086667	26799471	24999310	1.4	NONE
NKI PRAD and prostate (Pomerantz et al., Nature Genetics 2020)	NKI_19_HOXB13_Healthy	NONE	36861	21299514	20787249	19068192	8.7	NONE
NKI PRAD and prostate (Pomerantz et al., Nature Genetics 2020)	NKI_19_HOXB13_Tumor	NONE	38612	20220556	18738350	17078532	8.9	NONE
NKI PRAD and prostate (Pomerantz et al., Nature Genetics 2020)	NKI_1_AR_Healthy	NONE	7933	25948620	25309501	23104969	2.6	NONE
NKI PRAD and prostate (Pomerantz et al., Nature Genetics 2020)	NKI_1_AR_Tumor	NONE	17317	33911310	33038920	30105635	3.4	NONE
NKI PRAD and prostate (Pomerantz et al., Nature Genetics 2020)	NKI_1_FOXA1_Healthy	NONE	9493	24998008	23775804	21450008	3.1	NONE
NKI PRAD and prostate (Pomerantz et al., Nature Genetics 2020)	NKI_1_FOXA1_Tumor	NONE	20690	27544003	26274154	23851098	4.2	NONE
NKI PRAD and prostate (Pomerantz et al., Nature Genetics 2020)	NKI_1_H3K27AC_Healthy	NONE	13819	28511947	28318533	26462642	3	NONE
NKI PRAD and prostate (Pomerantz et al., Nature Genetics 2020)	NKI_1_H3K27AC_Tumor	NONE	19943	34070372	33842858	31618096	3.9	NONE
NKI PRAD and prostate (Pomerantz et al., Nature Genetics 2020)	NKI_1_HOXB13_Healthy	NONE	10572	22185975	21075457	19214741	3	NONE
NKI PRAD and prostate (Pomerantz et al., Nature Genetics 2020)	NKI_1_HOXB13_Tumor	NONE	48970	31085617	30063744	27556225	9.3	NONE
NKI PRAD and prostate (Pomerantz et al., Nature Genetics 2020)	NKI_23_AR_Healthy	NONE	664	18999847	14924679	13421669	1.5	NONE
NKI PRAD and prostate (Pomerantz et al., Nature Genetics 2020)	NKI_23_AR_Tumor	NONE	29464	23228024	22461828	20558486	6.3	NONE
NKI PRAD and prostate (Pomerantz et al., Nature Genetics 2020)	NKI_23_FOXA1_Healthy	NONE	4633	25103584	22711099	20433812	2.5	NONE
NKI PRAD and prostate (Pomerantz et al., Nature Genetics 2020)	NKI_23_FOXA1_Tumor	NONE	43877	24747904	22041584	20201887	9	NONE
NKI PRAD and prostate (Pomerantz et al., Nature Genetics 2020)	NKI_23_H3K27AC_Healthy	NONE	547	26283530	25914608	23831948	1.5	NONE
NKI PRAD and prostate (Pomerantz et al., Nature Genetics 2020)	NKI_23_H3K27AC_Tumor	NONE	31758	26976024	26578683	24997529	6.6	NONE
NKI PRAD and prostate (Pomerantz et al., Nature Genetics 2020)	NKI_23_HOXB13_Healthy	NONE	19450	40867687	25315515	23062831	2.9	NONE
NKI PRAD and prostate (Pomerantz et al., Nature Genetics 2020)	NKI_23_HOXB13_Tumor	NONE	41101	17584456	17059223	15689665	10.4	NONE
NKI PRAD and prostate (Pomerantz et al., Nature Genetics 2020)	NKI_25_AR_Healthy_rep1	NONE	14508	23274259	22864799	20893458	3.5	NONE
NKI PRAD and prostate (Pomerantz et al., Nature Genetics 2020)	NKI_25_AR_Healthy_rep2	NONE	22596	27685397	26955299	24470097	5	NONE
NKI PRAD and prostate (Pomerantz et al., Nature Genetics 2020)	NKI_25_FOXA1_Healthy_rep1	NONE	3220	17407096	16178890	14678902	2.1	NONE
NKI PRAD and prostate (Pomerantz et al., Nature Genetics 2020)	NKI_25_FOXA1_Healthy_rep2	NONE	3320	18317017	17562275	15788148	2.3	NONE
NKI PRAD and prostate (Pomerantz et al., Nature Genetics 2020)	NKI_25_H3K27AC_Healthy_rep1	NONE	22171	32639888	32368408	30265401	4.8	NONE
NKI PRAD and prostate (Pomerantz et al., Nature Genetics 2020)	NKI_25_H3K27AC_Healthy_rep2	NONE	27451	31192974	30924172	28820613	6.2	NONE
NKI PRAD and prostate (Pomerantz et al., Nature Genetics 2020)	NKI_25_HOXB13_Healthy_rep1	NONE	36926	25874057	25169102	23136531	7.7	NONE
NKI PRAD and prostate (Pomerantz et al., Nature Genetics 2020)	NKI_25_HOXB13_Healthy_rep2	NONE	45680	24191748	23624255	21606310	11	NONE
NKI PRAD and prostate (Pomerantz et al., Nature Genetics 2020)	NKI_27_AR_Healthy	NONE	15564	18951539	18572999	16859705	4.1	NONE
NKI PRAD and prostate (Pomerantz et al., Nature Genetics 2020)	NKI_27_AR_Tumor	NONE	21989	17685571	17070844	15560748	5.2	NONE
NKI PRAD and prostate (Pomerantz et al., Nature Genetics 2020)	NKI_27_FOXA1_Healthy	NONE	3174	19139004	18485166	16605160	2.5	NONE
NKI PRAD and prostate (Pomerantz et al., Nature Genetics 2020)	NKI_27_FOXA1_Tumor	NONE	31239	23539360	21995323	19932762	6.5	NONE
NKI PRAD and prostate (Pomerantz et al., Nature Genetics 2020)	NKI_27_H3K27AC_Healthy	NONE	10178	20109631	19924200	18730313	2.4	NONE
NKI PRAD and prostate (Pomerantz et al., Nature Genetics 2020)	NKI_27_H3K27AC_Tumor	NONE	7203	24941176	24613179	22960510	1.9	NONE
NKI PRAD and prostate (Pomerantz et al., Nature Genetics 2020)	NKI_27_HOXB13_Healthy	NONE	22837	37545690	26382781	24023046	3.5	NONE
NKI PRAD and prostate (Pomerantz et al., Nature Genetics 2020)	NKI_27_HOXB13_Tumor	NONE	48277	21192620	20028550	18406016	11.4	NONE
NKI PRAD and prostate (Pomerantz et al., Nature Genetics 2020)	NKI_29_AR_Healthy	NONE	988	22128507	21601963	19606230	1.8	NONE
NKI PRAD and prostate (Pomerantz et al., Nature Genetics 2020)	NKI_29_AR_Tumor	NONE	11394	23907373	23394386	21253394	3.1	NONE
NKI PRAD and prostate (Pomerantz et al., Nature Genetics 2020)	NKI_29_FOXA1_Healthy	NONE	11661	22543438	21815467	19802941	3.5	NONE
NKI PRAD and prostate (Pomerantz et al., Nature Genetics 2020)	NKI_29_FOXA1_Tumor	NONE	18031	20948817	19998995	18062579	4.3	NONE
NKI PRAD and prostate (Pomerantz et al., Nature Genetics 2020)	NKI_29_H3K27AC_Healthy	NONE	15732	39046549	38715530	35936165	3.1	NONE
NKI PRAD and prostate (Pomerantz et al., Nature Genetics 2020)	NKI_29_H3K27AC_Tumor	NONE	20921	27459084	27229501	25367134	4.8	NONE
NKI PRAD and prostate (Pomerantz et al., Nature Genetics 2020)	NKI_29_HOXB13_Healthy	NONE	20716	22018488	20427964	18581768	5	NONE
NKI PRAD and prostate (Pomerantz et al., Nature Genetics 2020)	NKI_29_HOXB13_Tumor	NONE	61083	24498328	22792794	20905896	13	NONE
NKI PRAD and prostate (Pomerantz et al., Nature Genetics 2020)	NKI_5_AR_Healthy	NONE	685	27846298	27307720	24734610	2.1	NONE
NKI PRAD and prostate (Pomerantz et al., Nature Genetics 2020)	NKI_5_AR_Tumor	NONE	9269	19373717	19097471	17255956	3.4	NONE
NKI PRAD and prostate (Pomerantz et al., Nature Genetics 2020)	NKI_5_FOXA1_Healthy	NONE	4002	31303347	29569687	26679223	2.5	NONE
NKI PRAD and prostate (Pomerantz et al., Nature Genetics 2020)	NKI_5_FOXA1_Tumor	NONE	55162	26171102	25281449	23265617	13.1	NONE
NKI PRAD and prostate (Pomerantz et al., Nature Genetics 2020)	NKI_5_H3K27AC_Healthy	NONE	15748	34188571	33789747	31211904	3.5	NONE
NKI PRAD and prostate (Pomerantz et al., Nature Genetics 2020)	NKI_5_H3K27AC_Tumor	NONE	30534	30044285	29757050	27789736	7.1	NONE
NKI PRAD and prostate (Pomerantz et al., Nature Genetics 2020)	NKI_5_HOXB13_Healthy	NONE	6519	23579936	21881441	19824306	2.6	NONE
NKI PRAD and prostate (Pomerantz et al., Nature Genetics 2020)	NKI_5_HOXB13_Tumor	NONE	49639	16288441	15831695	14649558	14.5	NONE
NKI PRAD and prostate (Pomerantz et al., Nature Genetics 2020)	NKI_7_AR_Healthy	NONE	1859	28061501	26101909	23595469	1.9	NONE
NKI PRAD and prostate (Pomerantz et al., Nature Genetics 2020)	NKI_7_AR_Tumor	NONE	19291	23750533	23366352	21241905	4.7	NONE
NKI PRAD and prostate (Pomerantz et al., Nature Genetics 2020)	NKI_7_FOXA1_Healthy	NONE	4145	28511990	26335590	23743010	2.3	NONE
NKI PRAD and prostate (Pomerantz et al., Nature Genetics 2020)	NKI_7_FOXA1_Tumor	NONE	39767	22420010	21586287	19589247	9.6	NONE
NKI PRAD and prostate (Pomerantz et al., Nature Genetics 2020)	NKI_7_H3K27AC_Healthy	NONE	2337	23011298	22790882	21183199	1.1	NONE
NKI PRAD and prostate (Pomerantz et al., Nature Genetics 2020)	NKI_7_H3K27AC_Tumor	NONE	14909	31395027	31150731	28917661	3	NONE
NKI PRAD and prostate (Pomerantz et al., Nature Genetics 2020)	NKI_7_HOXB13_Healthy	NONE	11987	34007214	30135631	27384300	2.9	NONE
NKI PRAD and prostate (Pomerantz et al., Nature Genetics 2020)	NKI_7_HOXB13_Tumor	NONE	64062	27107647	25272047	23229356	17.1	NONE
NKI PRAD and prostate (Pomerantz et al., Nature Genetics 2020)	K27ac_PDX_136	GSM4570048	60353	20010962	18530498	17454806	53.3	GSM4570048
NKI PRAD and prostate (Pomerantz et al., Nature Genetics 2020)	K27ac_PDX_141	GSM4570049	58070	20011593	18305651	17295261	53.2	GSM4570049
NKI PRAD and prostate (Pomerantz et al., Nature Genetics 2020)	K27ac_PDX_167	GSM4570050	50404	20010093	17719657	16776299	59	GSM4570050
NKI PRAD and prostate (Pomerantz et al., Nature Genetics 2020)	K27ac_PDX_170_2	GSM4570051	56019	20010575	16901247	16013106	53.9	GSM4570051
NKI PRAD and prostate (Pomerantz et al., Nature Genetics 2020)	K27ac_PDX_170_3	GSM4570052	58519	20010216	17341761	16354686	50.2	GSM4570052
NKI PRAD and prostate (Pomerantz et al., Nature Genetics 2020)	K27ac_PDX_189_3	GSM4570053	40119	20010931	18827363	18003402	65.7	GSM4570053
NKI PRAD and prostate (Pomerantz et al., Nature Genetics 2020)	K27ac_PDX_189_4	GSM4570054	43615	20012103	18593566	17607591	63.4	GSM4570054
NKI PRAD and prostate (Pomerantz et al., Nature Genetics 2020)	K27ac_PDX_35	GSM4570041	7886	20010247	18233132	17148448	3	GSM4570041
NKI PRAD and prostate (Pomerantz et al., Nature Genetics 2020)	K27ac_PDX_58	GSM4570043	64365	20008754	17975027	16984989	47.1	GSM4570043
NKI PRAD and prostate (Pomerantz et al., Nature Genetics 2020)	K27ac_PDX_70	GSM4570040	50075	20010460	17603474	16621754	51.1	GSM4570040
NKI PRAD and prostate (Pomerantz et al., Nature Genetics 2020)	K27ac_PDX_77	GSM4570042	59648	20012271	17818680	16748203	56.6	GSM4570042
NKI PRAD and prostate (Pomerantz et al., Nature Genetics 2020)	K27ac_PDX_78	GSM4570044	57833	20010567	17731027	16886159	52.2	GSM4570044
NKI PRAD and prostate (Pomerantz et al., Nature Genetics 2020)	K27ac_PDX_81	GSM4570045	41303	20031012	18037688	16387894	17.4	GSM4570045
NKI PRAD and prostate (Pomerantz et al., Nature Genetics 2020)	K27ac_PDX_86_2	GSM4570046	56062	20011671	13629895	12866907	28.5	GSM4570046
NKI PRAD and prostate (Pomerantz et al., Nature Genetics 2020)	K27ac_PDX_92	GSM4570047	44369	20011675	18908674	17740228	48.9	GSM4570047
NKI PRAD and prostate (Pomerantz et al., Nature Genetics 2020)	HOX_PDX_136	GSM4569945	457	20011962	17960454	16291669	1.2	GSM4569945
NKI PRAD and prostate (Pomerantz et al., Nature Genetics 2020)	HOX_PDX_141	GSM4569946	42909	20007694	17131233	16009595	13.9	GSM4569946
NKI PRAD and prostate (Pomerantz et al., Nature Genetics 2020)	HOX_PDX_167	GSM4569947	47899	20008949	17170259	15959260	15.2	GSM4569947
NKI PRAD and prostate (Pomerantz et al., Nature Genetics 2020)	HOX_PDX_170_2	GSM4569948	33087	20011040	18052671	16755493	8.4	GSM4569948
NKI PRAD and prostate (Pomerantz et al., Nature Genetics 2020)	HOX_PDX_170_3	GSM4569949	54534	20011739	18091306	16917151	15	GSM4569949
NKI PRAD and prostate (Pomerantz et al., Nature Genetics 2020)	HOX_PDX_189_3	GSM4569950	66635	20008805	18856528	17834872	28.4	GSM4569950
NKI PRAD and prostate (Pomerantz et al., Nature Genetics 2020)	HOX_PDX_189_4	GSM4569951	36440	20011832	18381494	17072009	10.2	GSM4569951
NKI PRAD and prostate (Pomerantz et al., Nature Genetics 2020)	HOX_PDX_35	GSM4569938	61119	20008344	17877024	16757989	14.2	GSM4569938
NKI PRAD and prostate (Pomerantz et al., Nature Genetics 2020)	HOX_PDX_58	GSM4569940	73569	20008767	18238588	17221080	22.6	GSM4569940
NKI PRAD and prostate (Pomerantz et al., Nature Genetics 2020)	HOX_PDX_70	GSM4569937	43700	20009331	17922237	16626117	15.6	GSM4569937
NKI PRAD and prostate (Pomerantz et al., Nature Genetics 2020)	HOX_PDX_77	GSM4569939	71730	20009535	18296359	17211906	25.7	GSM4569939
NKI PRAD and prostate (Pomerantz et al., Nature Genetics 2020)	HOX_PDX_78	GSM4569941	60559	20012505	18540135	17415330	22.3	GSM4569941
NKI PRAD and prostate (Pomerantz et al., Nature Genetics 2020)	HOX_PDX_81	GSM4569942	2374	20035463	17909692	15746188	2.5	GSM4569942
NKI PRAD and prostate (Pomerantz et al., Nature Genetics 2020)	HOX_PDX_86_2	GSM4569943	69247	20009907	17253908	16212591	18.7	GSM4569943
NKI PRAD and prostate (Pomerantz et al., Nature Genetics 2020)	HOX_PDX_92	GSM4569944	43639	20011477	18710677	17411866	15.9	GSM4569944
NKI PRAD and prostate (Pomerantz et al., Nature Genetics 2020)	AR_PDX_136	GSM4569861	7357	20012136	17784239	16095903	3.1	GSM4569861
NKI PRAD and prostate (Pomerantz et al., Nature Genetics 2020)	AR_PDX_141	GSM4569862	10071	20009518	16289998	14945231	4	GSM4569862
NKI PRAD and prostate (Pomerantz et al., Nature Genetics 2020)	AR_PDX_167	GSM4569863	28433	20010549	16526522	15129964	9.2	GSM4569863
NKI PRAD and prostate (Pomerantz et al., Nature Genetics 2020)	AR_PDX_170_2	GSM4569864	33283	20010438	17036466	15670599	10.6	GSM4569864
NKI PRAD and prostate (Pomerantz et al., Nature Genetics 2020)	AR_PDX_170_3	GSM4569865	24362	20008990	16158316	14754848	7.6	GSM4569865
NKI PRAD and prostate (Pomerantz et al., Nature Genetics 2020)	AR_PDX_189_3	GSM4569866	60039	20010526	18594386	17506532	32.2	GSM4569866
NKI PRAD and prostate (Pomerantz et al., Nature Genetics 2020)	AR_PDX_189_4	GSM4569867	34457	20012726	18120218	16734379	11.9	GSM4569867
NKI PRAD and prostate (Pomerantz et al., Nature Genetics 2020)	AR_PDX_35	GSM4569853	19377	20018856	19589458	18071100	5.9	GSM4569853
NKI PRAD and prostate (Pomerantz et al., Nature Genetics 2020)	AR_PDX_58	GSM4569856	26145	20008228	16786649	15510359	6.6	GSM4569856
NKI PRAD and prostate (Pomerantz et al., Nature Genetics 2020)	AR_PDX_70	GSM4569854	17858	20011972	17165421	15781897	6.3	GSM4569854
NKI PRAD and prostate (Pomerantz et al., Nature Genetics 2020)	AR_PDX_77	GSM4569855	66521	20008190	16904305	15706946	26.5	GSM4569855
NKI PRAD and prostate (Pomerantz et al., Nature Genetics 2020)	AR_PDX_78	GSM4569857	29821	9890908	8991454	8319126	14.2	GSM4569857
NKI PRAD and prostate (Pomerantz et al., Nature Genetics 2020)	AR_PDX_81	GSM4569858	14680	20025010	18080334	16329936	6.4	GSM4569858
NKI PRAD and prostate (Pomerantz et al., Nature Genetics 2020)	AR_PDX_86_2	GSM4569859	18192	20010550	14130855	12903858	4.7	GSM4569859
NKI PRAD and prostate (Pomerantz et al., Nature Genetics 2020)	AR_PDX_92	GSM4569860	39130	20012490	18584003	17226105	17.5	GSM4569860
NKI PRAD and prostate (Pomerantz et al., Nature Genetics 2020)	FOXA1_PDX_136	GSM4569902	37742	20011587	18043852	16495991	10.7	GSM4569902
NKI PRAD and prostate (Pomerantz et al., Nature Genetics 2020)	FOXA1_PDX_141	GSM4569903	60291	20008583	17250811	16173017	22.1	GSM4569903
NKI PRAD and prostate (Pomerantz et al., Nature Genetics 2020)	FOXA1_PDX_167	GSM4569904	69214	20009766	18003833	16893185	28.1	GSM4569904
NKI PRAD and prostate (Pomerantz et al., Nature Genetics 2020)	FOXA1_PDX_170_2	GSM4569905	54882	20011198	18157081	16896620	17.1	GSM4569905
NKI PRAD and prostate (Pomerantz et al., Nature Genetics 2020)	FOXA1_PDX_170_3	GSM4569906	71545	20011072	18036475	16844878	21.2	GSM4569906
NKI PRAD and prostate (Pomerantz et al., Nature Genetics 2020)	FOXA1_PDX_189_3	GSM4569907	48147	11742733	10978813	10354788	24.2	GSM4569907
NKI PRAD and prostate (Pomerantz et al., Nature Genetics 2020)	FOXA1_PDX_35	GSM4569895	64021	20008435	17929728	16775487	14.3	GSM4569895
NKI PRAD and prostate (Pomerantz et al., Nature Genetics 2020)	FOXA1_PDX_58	GSM4569896	87324	20008431	18199331	17134394	26.4	GSM4569896
NKI PRAD and prostate (Pomerantz et al., Nature Genetics 2020)	FOXA1_PDX_70	GSM4569897	59445	20009034	17710999	16517059	24.1	GSM4569897
NKI PRAD and prostate (Pomerantz et al., Nature Genetics 2020)	FOXA1_PDX_77	GSM4569898	84608	20009915	18081507	16916254	31.3	GSM4569898
NKI PRAD and prostate (Pomerantz et al., Nature Genetics 2020)	FOXA1_PDX_78	GSM4569899	79355	20010535	18757123	17729427	32.7	GSM4569899
NKI PRAD and prostate (Pomerantz et al., Nature Genetics 2020)	FOXA1_PDX_81	GSM4569900	40450	20031027	18312728	16471204	10.3	GSM4569900
NKI PRAD and prostate (Pomerantz et al., Nature Genetics 2020)	FOXA1_PDX_86_2	GSM4569909	98452	20009068	17815535	16865219	31.6	GSM4569909
NKI PRAD and prostate (Pomerantz et al., Nature Genetics 2020)	FOXA1_PDX_92	GSM4569901	61182	20011966	18875683	17603464	24.4	GSM4569901
NKI PRAD (Stelloo et al., Nature Communications 2018)	P223T_AR_1	SRR7949074	4123	24631063	23377844	21276692	2.1	SRR7949074
NKI PRAD (Stelloo et al., Nature Communications 2018)	P227T_AR_1	SRR7949075	9507	22541437	21342558	19446086	2.7	SRR7949075
NKI PRAD (Stelloo et al., Nature Communications 2018)	P228T_AR_1	SRR7949076	11436	22406711	20812570	18971155	3.1	SRR7949076
NKI PRAD (Stelloo et al., Nature Communications 2018)	P229T_AR_1	SRR7949077	17502	20111921	19490835	17675233	4.8	SRR7949077
NKI PRAD (Stelloo et al., Nature Communications 2018)	P230T_AR_1	SRR7949078	14608	25479384	24895497	22636612	3.9	SRR7949078
NKI PRAD (Stelloo et al., Nature Communications 2018)	P249T_AR_1	SRR7949079	13118	24105864	23221053	21126870	3.7	SRR7949079
NKI PRAD (Stelloo et al., Nature Communications 2018)	P252T_AR_1	SRR7949080	6910	21844517	20992151	18844014	3	SRR7949080
NKI PRAD (Stelloo et al., Nature Communications 2018)	P254T_AR_1	SRR7949081	3516	22074928	21087012	19136169	2.2	SRR7949081
NKI PRAD (Stelloo et al., Nature Communications 2018)	P255T_AR_1	SRR7949082	27155	39778801	25062546	22404581	4.3	SRR7949082
NKI PRAD (Stelloo et al., Nature Communications 2018)	P257T_AR_1	SRR7949083	5683	24438999	22759065	20657164	2.2	SRR7949083
NKI PRAD (Stelloo et al., Nature Communications 2018)	P261T_AR_1	SRR7949084	4949	17141504	16718859	15222088	2.3	SRR7949084
NKI PRAD (Stelloo et al., Nature Communications 2018)	P262T_AR_1	SRR7949085	6683	22101731	20865489	18928592	2.6	SRR7949085
NKI PRAD (Stelloo et al., Nature Communications 2018)	P263T_AR_1	SRR7949086	4315	25266891	24728941	22360321	2.5	SRR7949086
NKI PRAD (Stelloo et al., Nature Communications 2018)	P265T_AR_1	SRR7949087	1838	24544629	24229457	22039304	2	SRR7949087
NKI PRAD (Stelloo et al., Nature Communications 2018)	P266T_AR_1	SRR7949088	19841	18398168	17879431	16419096	5.3	SRR7949088
NKI PRAD (Stelloo et al., Nature Communications 2018)	P268T_AR_1	SRR7949089	11721	18537275	17824829	16390704	3.6	SRR7949089
NKI PRAD (Stelloo et al., Nature Communications 2018)	P272T_AR_1	SRR7949090	2781	22891336	22464528	20359264	2.2	SRR7949090
NKI PRAD (Stelloo et al., Nature Communications 2018)	P274T_AR_1	SRR7949091	2559	18538486	17493319	15787951	2.1	SRR7949091
NKI PRAD (Stelloo et al., Nature Communications 2018)	P276T_AR_1	SRR7949092	9362	10234176	9379296	8505095	3.6	SRR7949092
NKI PRAD (Stelloo et al., Nature Communications 2018)	P279T_AR_1	SRR7949093	2351	22900163	21921420	19780296	2.1	SRR7949093
NKI PRAD (Stelloo et al., Nature Communications 2018)	P280T_AR_1	SRR7949094	3808	24319113	23080160	20898659	2.2	SRR7949094
NKI PRAD (Stelloo et al., Nature Communications 2018)	P291T_AR_1	SRR7949095	1859	26485140	25541534	23141076	1.9	SRR7949095
NKI PRAD (Stelloo et al., Nature Communications 2018)	P294T_AR_1	SRR7949096	6043	27588173	27266094	24839004	2.5	SRR7949096
NKI PRAD (Stelloo et al., Nature Communications 2018)	P295T_AR_1	SRR7949097	687	21792596	20875837	18904446	1.7	SRR7949097
NKI PRAD (Stelloo et al., Nature Communications 2018)	P297T_AR_1	SRR7949098	7299	20430376	17644409	16020737	2.4	SRR7949098
NKI PRAD (Stelloo et al., Nature Communications 2018)	P298T_AR_1	SRR7949099	5808	31727127	31323181	28581323	2.4	SRR7949099
NKI PRAD (Stelloo et al., Nature Communications 2018)	P300T_AR_1	SRR7949100	6089	18030334	17759054	16240905	2.3	SRR7949100
NKI PRAD (Stelloo et al., Nature Communications 2018)	P301T_AR_1	SRR7949101	11898	15346579	14606470	13369879	3.3	SRR7949101
NKI PRAD (Stelloo et al., Nature Communications 2018)	P305T_AR_1	SRR7949102	8983	17062976	16313227	14830616	2.8	SRR7949102
NKI PRAD (Stelloo et al., Nature Communications 2018)	P309T_AR_1	SRR7949103	1115	15349690	15086116	13698582	1.7	SRR7949103
NKI PRAD (Stelloo et al., Nature Communications 2018)	P310T_AR_1	SRR7949104	24606	19850221	18715577	17100673	6.2	SRR7949104
NKI PRAD (Stelloo et al., Nature Communications 2018)	P313T_AR_1	SRR7949105	10831	23632427	22351221	20484865	3	SRR7949105
NKI PRAD (Stelloo et al., Nature Communications 2018)	P324T_AR_1	SRR7949106	12824	27895421	22436486	20154016	3	SRR7949106
NKI PRAD (Stelloo et al., Nature Communications 2018)	P327T_AR_1	SRR7949107	539	22886679	19014028	17103971	1.7	SRR7949107
NKI PRAD (Stelloo et al., Nature Communications 2018)	P328T_AR_1	SRR7949108	2583	21130441	18286605	16373491	2	SRR7949108
NKI PRAD (Stelloo et al., Nature Communications 2018)	P336T_AR_1	SRR7949109	2765	25676540	24997636	22744599	2	SRR7949109
NKI PRAD (Stelloo et al., Nature Communications 2018)	P342T_AR_1	SRR7949110	3751	22723687	21334340	19462837	1.9	SRR7949110
NKI PRAD (Stelloo et al., Nature Communications 2018)	P343T_AR_1	SRR7949111	27670	16797929	15317472	14008342	7	SRR7949111
NKI PRAD (Stelloo et al., Nature Communications 2018)	P348T_AR_1	SRR7949112	1530	37465809	26498474	23777790	1.5	SRR7949112
NKI PRAD (Stelloo et al., Nature Communications 2018)	P349T_AR_1	SRR7949113	426	16635594	9835791	8686081	0.8	SRR7949113
NKI PRAD (Stelloo et al., Nature Communications 2018)	P352T_AR_1	SRR7949114	14263	16807413	13614448	12302442	3.9	SRR7949114
NKI PRAD (Stelloo et al., Nature Communications 2018)	P355T_AR_1	SRR7949115	1608	24527525	24235382	21844449	2.1	SRR7949115
NKI PRAD (Stelloo et al., Nature Communications 2018)	P416T_AR_1	SRR7949116	13233	21716771	20323773	18420129	3.8	SRR7949116
NKI PRAD (Stelloo et al., Nature Communications 2018)	P426T_AR_1	SRR7949117	10691	27981894	20547655	18588172	2.4	SRR7949117
NKI PRAD (Stelloo et al., Nature Communications 2018)	P427T_AR_1	SRR7949118	33000	23341002	22400729	20667217	7.9	SRR7949118
NKI PRAD (Stelloo et al., Nature Communications 2018)	P431T_AR_1	SRR7949119	4306	20031978	19586697	17693766	2.4	SRR7949119
NKI PRAD (Stelloo et al., Nature Communications 2018)	P433T_AR_1	SRR7949120	556	17681045	17158503	15500974	1.8	SRR7949120
NKI PRAD (Stelloo et al., Nature Communications 2018)	P444T_AR_1	SRR7949121	749	33093645	23982429	21415650	1.6	SRR7949121
NKI PRAD (Stelloo et al., Nature Communications 2018)	P449T_AR_1	SRR7949122	4293	25860410	25000849	22685358	2.4	SRR7949122
NKI PRAD (Stelloo et al., Nature Communications 2018)	P450T_AR_1	SRR7949123	2537	19640973	18421449	16666908	2	SRR7949123
NKI PRAD (Stelloo et al., Nature Communications 2018)	P452T_AR_1	SRR7949124	860	18308758	17645135	15961777	1.7	SRR7949124
NKI PRAD (Stelloo et al., Nature Communications 2018)	P456T_AR_1	SRR7949125	7892	16481399	15987588	14620128	2.8	SRR7949125
NKI PRAD (Stelloo et al., Nature Communications 2018)	P462T_AR_1	SRR7949126	16130	19423878	18989229	17335273	4.5	SRR7949126
NKI PRAD (Stelloo et al., Nature Communications 2018)	P464T_AR_1	SRR7949127	5776	23422283	22999605	20795858	2.6	SRR7949127
NKI PRAD (Stelloo et al., Nature Communications 2018)	P466T_AR_1	SRR7949128	1969	23747949	18241339	16175248	1.9	SRR7949128
NKI PRAD (Stelloo et al., Nature Communications 2018)	P475T_AR_1	SRR7949129	518	16402853	12784531	11376630	1.6	SRR7949129
NKI PRAD (Stelloo et al., Nature Communications 2018)	P500T_AR_1	SRR7949130	6110	22752508	22292665	20269970	2.5	SRR7949130
NKI PRAD (Stelloo et al., Nature Communications 2018)	P506T_AR_1	SRR7949131	1822	18900616	18439663	16632342	2	SRR7949131
NKI PRAD (Stelloo et al., Nature Communications 2018)	P507T_AR_1	SRR7949132	11803	23649068	22992342	21035681	3.7	SRR7949132
NKI PRAD (Stelloo et al., Nature Communications 2018)	P509T_AR_1	SRR7949133	13478	24847209	24128079	22034892	3.7	SRR7949133
NKI PRAD (Stelloo et al., Nature Communications 2018)	P511T_AR_1	SRR7949134	2133	10172723	9181222	8305047	1.7	SRR7949134
NKI PRAD (Stelloo et al., Nature Communications 2018)	P513T_AR_1	SRR7949135	3295	7604224	6834513	6180291	2.1	SRR7949135
NKI PRAD (Stelloo et al., Nature Communications 2018)	P527T_AR_1	SRR7949136	10281	23533536	21464165	19443512	3	SRR7949136
NKI PRAD (Stelloo et al., Nature Communications 2018)	P531T_AR_1	SRR7949137	1371	17394039	16515395	14919157	1.8	SRR7949137
NKI PRAD (Stelloo et al., Nature Communications 2018)	P533T_AR_1	SRR7949138	993	10141528	9680334	8738968	1.7	SRR7949138
NKI PRAD (Stelloo et al., Nature Communications 2018)	P534T_AR_1	SRR7949139	5096	10348527	9578927	8682363	2.6	SRR7949139
NKI PRAD (Stelloo et al., Nature Communications 2018)	P536T_AR_1	SRR7949140	17698	19460033	18831008	17140009	4.5	SRR7949140
NKI PRAD (Stelloo et al., Nature Communications 2018)	P540T_AR_1	SRR7949141	8867	24794588	24473080	22236127	2.9	SRR7949141
NKI PRAD (Stelloo et al., Nature Communications 2018)	P544T_AR_1	SRR7949142	1063	24504822	24177702	21899936	2	SRR7949142
NKI PRAD (Stelloo et al., Nature Communications 2018)	P552T_AR_1	SRR7949143	15123	19642378	18635756	16958363	3.9	SRR7949143
NKI PRAD (Stelloo et al., Nature Communications 2018)	P555T_AR_1	SRR7949144	826	24574259	24289232	21973541	1.9	SRR7949144
NKI PRAD (Stelloo et al., Nature Communications 2018)	P559T_AR_1	SRR7949145	1164	18554264	18049262	16379945	1.8	SRR7949145
NKI PRAD (Stelloo et al., Nature Communications 2018)	P560T_AR_1	SRR7949146	1554	23000156	21997429	19926474	1.9	SRR7949146
NKI PRAD (Stelloo et al., Nature Communications 2018)	P593T_AR_1	SRR7949147	2280	21578525	20941238	18957208	2	SRR7949147
NKI PRAD (Stelloo et al., Nature Communications 2018)	P603T_AR_1	SRR7949148	1510	22130743	20682492	18639468	2.1	SRR7949148
NKI PRAD (Stelloo et al., Nature Communications 2018)	P618T_AR_1	SRR7949149	20633	22503833	21327421	19527589	5	SRR7949149
NKI PRAD (Stelloo et al., Nature Communications 2018)	P643T_AR_1	SRR7949150	5102	39430694	38600041	35021677	2.4	SRR7949150
NKI PRAD (Stelloo et al., Nature Communications 2018)	P674T_AR_1	SRR7949151	20292	23998830	23665411	21470233	4.9	SRR7949151
NKI PRAD (Stelloo et al., Nature Communications 2018)	P680T_AR_1	SRR7949152	5280	32049638	31669160	28893331	2.3	SRR7949152
NKI PRAD (Stelloo et al., Nature Communications 2018)	P695T_AR_1	SRR7949153	10113	30195697	29870205	27305578	3	SRR7949153
NKI PRAD (Stelloo et al., Nature Communications 2018)	P710T_AR_1	SRR7949154	2274	21060791	20555389	18658114	1.9	SRR7949154
NKI PRAD (Stelloo et al., Nature Communications 2018)	P717T_AR_1	SRR7949155	1067	27671547	26855251	24256883	1.8	SRR7949155
NKI PRAD (Stelloo et al., Nature Communications 2018)	P730T_AR_1	SRR7949156	2385	25488198	24699031	22335438	2.1	SRR7949156
NKI PRAD (Stelloo et al., Nature Communications 2018)	P737T_AR_1	SRR7949157	4257	40336781	39639184	35781450	2.5	SRR7949157
NKI PRAD (Stelloo et al., Nature Communications 2018)	P747T_AR_1	SRR7949158	2641	25075853	24297710	21923500	2.4	SRR7949158
NKI PRAD (Stelloo et al., Nature Communications 2018)	P779T_AR_1	SRR7949159	659	23161394	21983713	19900023	1.8	SRR7949159
NKI PRAD (Stelloo et al., Nature Communications 2018)	P811T_AR_1	SRR7949160	3819	22325226	16336994	14677999	1.7	SRR7949160
NKI PRAD (Stelloo et al., Nature Communications 2018)	P832T_AR_1	SRR7949161	3566	31814042	30955797	28107832	2.1	SRR7949161
NKI PRAD (Stelloo et al., Nature Communications 2018)	P223T_H3K27ac_1	SRR7949163	37149	14680914	14275445	13448609	21.1	SRR7949163
NKI PRAD (Stelloo et al., Nature Communications 2018)	P227T_H3K27ac_1	SRR7949164	54344	30087087	29465175	27958876	24.2	SRR7949164
NKI PRAD (Stelloo et al., Nature Communications 2018)	P228T_H3K27ac_1	SRR7949166	51660	27410205	26021132	24714132	21.7	SRR7949166
NKI PRAD (Stelloo et al., Nature Communications 2018)	P229T_H3K27ac_1	SRR7949171	56837	25316202	25039589	23688783	29.2	SRR7949171
NKI PRAD (Stelloo et al., Nature Communications 2018)	P230T_H3K27ac_1	SRR7949252	70423	29183413	28640174	27122741	33.2	SRR7949252
NKI PRAD (Stelloo et al., Nature Communications 2018)	P245T_H3K27ac_1	SRR7949170	45321	20662090	19846865	18833301	24.6	SRR7949170
NKI PRAD (Stelloo et al., Nature Communications 2018)	P249T_H3K27ac_1	SRR7949248	54727	25640929	24754739	23345683	26.1	SRR7949248
NKI PRAD (Stelloo et al., Nature Communications 2018)	P252T_H3K27ac_1	SRR7949167	45282	26893308	26193159	24657584	21	SRR7949167
NKI PRAD (Stelloo et al., Nature Communications 2018)	P254T_H3K27ac_1	SRR7949244	59268	26347958	25757773	24249013	26.4	SRR7949244
NKI PRAD (Stelloo et al., Nature Communications 2018)	P255T_H3K27ac_1	SRR7949172	34625	22187705	21186399	20050752	12.7	SRR7949172
NKI PRAD (Stelloo et al., Nature Communications 2018)	P257T_H3K27ac_1	SRR7949168	43660	24088885	23133468	21817256	23.8	SRR7949168
NKI PRAD (Stelloo et al., Nature Communications 2018)	P261T_H3K27ac_1	SRR7949195	55320	29600767	29012230	27201152	22.2	SRR7949195
NKI PRAD (Stelloo et al., Nature Communications 2018)	P262T_H3K27ac_1	SRR7949169	46086	19702622	18558797	17583247	23.9	SRR7949169
NKI PRAD (Stelloo et al., Nature Communications 2018)	P263T_H3K27ac_1	SRR7949243	55869	28671117	28257742	26410116	23.4	SRR7949243
NKI PRAD (Stelloo et al., Nature Communications 2018)	P265T_H3K27ac_1	SRR7949234	50557	27619441	27419418	25872477	19.6	SRR7949234
NKI PRAD (Stelloo et al., Nature Communications 2018)	P266T_H3K27ac_1	SRR7949211	33916	13050114	12714251	12109802	20.5	SRR7949211
NKI PRAD (Stelloo et al., Nature Communications 2018)	P268T_H3K27ac_1	SRR7949216	69089	34398122	33828314	32124362	32.5	SRR7949216
NKI PRAD (Stelloo et al., Nature Communications 2018)	P272T_H3K27ac_1	SRR7949246	58898	24291359	23930976	22562751	28.4	SRR7949246
NKI PRAD (Stelloo et al., Nature Communications 2018)	P274T_H3K27ac_1	SRR7949251	55337	27692472	26934684	25288030	21.8	SRR7949251
NKI PRAD (Stelloo et al., Nature Communications 2018)	P276T_H3K27ac_1	SRR7949173	55264	27873361	27120830	25474327	21.9	SRR7949173
NKI PRAD (Stelloo et al., Nature Communications 2018)	P279T_H3K27ac_1	SRR7949247	58983	26771060	26063690	24500134	32.6	SRR7949247
NKI PRAD (Stelloo et al., Nature Communications 2018)	P280T_H3K27ac_1	SRR7949250	60851	26514057	25741948	24327502	26.1	SRR7949250
NKI PRAD (Stelloo et al., Nature Communications 2018)	P291T_H3K27ac_1	SRR7949249	45765	26301103	25843593	24012037	20.9	SRR7949249
NKI PRAD (Stelloo et al., Nature Communications 2018)	P294T_H3K27ac_1	SRR7949235	50919	29859847	29659901	27882959	21.1	SRR7949235
NKI PRAD (Stelloo et al., Nature Communications 2018)	P295T_H3K27ac_1	SRR7949245	30760	24639333	23977414	22267808	10.8	SRR7949245
NKI PRAD (Stelloo et al., Nature Communications 2018)	P297T_H3K27ac_1	SRR7949209	35771	20716055	20117912	19055452	19.7	SRR7949209
NKI PRAD (Stelloo et al., Nature Communications 2018)	P298T_H3K27ac_1	SRR7949242	28935	27178673	26939857	25155550	7.3	SRR7949242
NKI PRAD (Stelloo et al., Nature Communications 2018)	P300T_H3K27ac_1	SRR7949210	74375	36629881	36149839	34371433	33	SRR7949210
NKI PRAD (Stelloo et al., Nature Communications 2018)	P301T_H3K27ac_1	SRR7949203	63318	35781480	35192783	33430333	31.2	SRR7949203
NKI PRAD (Stelloo et al., Nature Communications 2018)	P305T_H3K27ac_1	SRR7949208	48021	25213151	24573157	23272330	20.7	SRR7949208
NKI PRAD (Stelloo et al., Nature Communications 2018)	P313T_H3K27ac_1	SRR7949165	47229	28305563	27227873	25736443	19	SRR7949165
NKI PRAD (Stelloo et al., Nature Communications 2018)	P324T_H3K27ac_1	SRR7949204	31886	17189221	16281242	15289518	15.1	SRR7949204
NKI PRAD (Stelloo et al., Nature Communications 2018)	P327T_H3K27ac_1	SRR7949162	26323	19217064	18214534	17051855	10.1	SRR7949162
NKI PRAD (Stelloo et al., Nature Communications 2018)	P328T_H3K27ac_1	SRR7949205	36597	17777787	17125186	16125953	17.7	SRR7949205
NKI PRAD (Stelloo et al., Nature Communications 2018)	P336T_H3K27ac_1	SRR7949253	53683	27525850	26963384	25265395	26.8	SRR7949253
NKI PRAD (Stelloo et al., Nature Communications 2018)	P342T_H3K27ac_1	SRR7949188	47155	26931297	26249843	24944068	17.7	SRR7949188
NKI PRAD (Stelloo et al., Nature Communications 2018)	P343T_H3K27ac_1	SRR7949206	54271	23802115	23177897	21893034	31	SRR7949206
NKI PRAD (Stelloo et al., Nature Communications 2018)	P348T_H3K27ac_1	SRR7949196	6117	9669162	7683837	7212575	1.6	SRR7949196
NKI PRAD (Stelloo et al., Nature Communications 2018)	P352T_H3K27ac_1	SRR7949174	44151	24037837	23225279	21943022	20.5	SRR7949174
NKI PRAD (Stelloo et al., Nature Communications 2018)	P355T_H3K27ac_1	SRR7949236	63634	32460341	32242075	30351031	22.1	SRR7949236
NKI PRAD (Stelloo et al., Nature Communications 2018)	P416T_H3K27ac_1	SRR7949189	46950	24763220	24103071	22750646	18.1	SRR7949189
NKI PRAD (Stelloo et al., Nature Communications 2018)	P426T_H3K27ac_1	SRR7949197	36326	21088874	19937191	18853002	14.2	SRR7949197
NKI PRAD (Stelloo et al., Nature Communications 2018)	P427T_H3K27ac_1	SRR7949190	50424	22948833	22661048	21554918	24.5	SRR7949190
NKI PRAD (Stelloo et al., Nature Communications 2018)	P431T_H3K27ac_1	SRR7949198	55045	24262473	23831152	22335992	21.5	SRR7949198
NKI PRAD (Stelloo et al., Nature Communications 2018)	P433T_H3K27ac_1	SRR7949199	36176	17279991	16935944	15836777	16.5	SRR7949199
NKI PRAD (Stelloo et al., Nature Communications 2018)	P444T_H3K27ac_1	SRR7949200	35372	23367540	22621137	21366321	12.9	SRR7949200
NKI PRAD (Stelloo et al., Nature Communications 2018)	P449T_H3K27ac_1	SRR7949191	52513	20551934	20114263	19084220	25.1	SRR7949191
NKI PRAD (Stelloo et al., Nature Communications 2018)	P450T_H3K27ac_1	SRR7949212	31571	15241535	14748080	13943350	16.6	SRR7949212
NKI PRAD (Stelloo et al., Nature Communications 2018)	P452T_H3K27ac_1	SRR7949224	32399	22707534	21291849	20016926	11.2	SRR7949224
NKI PRAD (Stelloo et al., Nature Communications 2018)	P456T_H3K27ac_1	SRR7949201	42892	19474009	19016238	17978655	22	SRR7949201
NKI PRAD (Stelloo et al., Nature Communications 2018)	P457T_H3K27ac_1	SRR7949202	26410	24984238	22993207	21622010	9.2	SRR7949202
NKI PRAD (Stelloo et al., Nature Communications 2018)	P462T_H3K27ac_1	SRR7949192	47343	17012064	16681474	15713135	20.3	SRR7949192
NKI PRAD (Stelloo et al., Nature Communications 2018)	P464T_H3K27ac_1	SRR7949225	57785	32496067	31617530	29702984	24.1	SRR7949225
NKI PRAD (Stelloo et al., Nature Communications 2018)	P466T_H3K27ac_1	SRR7949180	38112	20361344	19696960	18499188	14.3	SRR7949180
NKI PRAD (Stelloo et al., Nature Communications 2018)	P475T_H3K27ac_1	SRR7949181	37475	21403398	20890682	19693739	13.8	SRR7949181
NKI PRAD (Stelloo et al., Nature Communications 2018)	P500T_H3K27ac_1	SRR7949193	63382	32973000	32507561	30596181	25.7	SRR7949193
NKI PRAD (Stelloo et al., Nature Communications 2018)	P506T_H3K27ac_1	SRR7949213	55318	24396233	23918215	22659692	33.9	SRR7949213
NKI PRAD (Stelloo et al., Nature Communications 2018)	P507T_H3K27ac_1	SRR7949182	47115	20962265	20569599	19451007	25.3	SRR7949182
NKI PRAD (Stelloo et al., Nature Communications 2018)	P509T_H3K27ac_1	SRR7949183	55217	27277625	26582957	25150140	32	SRR7949183
NKI PRAD (Stelloo et al., Nature Communications 2018)	P511T_H3K27ac_1	SRR7949175	54386	27201251	26493476	25034645	22.3	SRR7949175
NKI PRAD (Stelloo et al., Nature Communications 2018)	P513T_H3K27ac_1	SRR7949176	20693	10718580	10412764	9839651	10.2	SRR7949176
NKI PRAD (Stelloo et al., Nature Communications 2018)	P527T_H3K27ac_1	SRR7949184	48528	23534184	23060029	21597645	20.4	SRR7949184
NKI PRAD (Stelloo et al., Nature Communications 2018)	P531T_H3K27ac_1	SRR7949226	42887	26857114	24793298	23310119	13.8	SRR7949226
NKI PRAD (Stelloo et al., Nature Communications 2018)	P533T_H3K27ac_1	SRR7949177	38894	16357411	16047632	15020185	19.6	SRR7949177
NKI PRAD (Stelloo et al., Nature Communications 2018)	P534T_H3K27ac_1	SRR7949178	54121	28389652	27642713	26053713	29.3	SRR7949178
NKI PRAD (Stelloo et al., Nature Communications 2018)	P536T_H3K27ac_1	SRR7949217	57278	25924152	25552592	24317993	22.7	SRR7949217
NKI PRAD (Stelloo et al., Nature Communications 2018)	P540T_H3K27ac_1	SRR7949237	44923	25337062	25178607	23698739	15	SRR7949237
NKI PRAD (Stelloo et al., Nature Communications 2018)	P544T_H3K27ac_1	SRR7949238	49186	25689750	25484604	23910786	19.3	SRR7949238
NKI PRAD (Stelloo et al., Nature Communications 2018)	P552T_H3K27ac_1	SRR7949194	51395	26222268	25670613	24254918	16.7	SRR7949194
NKI PRAD (Stelloo et al., Nature Communications 2018)	P555T_H3K27ac_1	SRR7949231	57131	27346506	27200754	25594914	22.3	SRR7949231
NKI PRAD (Stelloo et al., Nature Communications 2018)	P559T_H3K27ac_1	SRR7949227	43663	35739387	34042162	32079466	16.3	SRR7949227
NKI PRAD (Stelloo et al., Nature Communications 2018)	P560T_H3K27ac_1	SRR7949228	38384	23870379	22969806	21513697	15.5	SRR7949228
NKI PRAD (Stelloo et al., Nature Communications 2018)	P593T_H3K27ac_1	SRR7949229	48180	27231686	26269025	24584323	16.7	SRR7949229
NKI PRAD (Stelloo et al., Nature Communications 2018)	P603T_H3K27ac_1	SRR7949230	24184	20918210	19724536	18363734	7	SRR7949230
NKI PRAD (Stelloo et al., Nature Communications 2018)	P611T_H3K27ac_1	SRR7949232	29812	27112576	26962027	25277115	7.9	SRR7949232
NKI PRAD (Stelloo et al., Nature Communications 2018)	P618T_H3K27ac_1	SRR7949185	45725	23985265	23137597	21926052	21.4	SRR7949185
NKI PRAD (Stelloo et al., Nature Communications 2018)	P643T_H3K27ac_1	SRR7949218	52510	26715644	26439541	24938618	24.8	SRR7949218
NKI PRAD (Stelloo et al., Nature Communications 2018)	P660T_H3K27ac_1	SRR7949233	44306	28648569	28448866	26559020	14.6	SRR7949233
NKI PRAD (Stelloo et al., Nature Communications 2018)	P674T_H3K27ac_1	SRR7949239	33050	24241702	24037518	22392900	9.7	SRR7949239
NKI PRAD (Stelloo et al., Nature Communications 2018)	P680T_H3K27ac_1	SRR7949240	47458	27577107	27339500	25676396	17.6	SRR7949240
NKI PRAD (Stelloo et al., Nature Communications 2018)	P695T_H3K27ac_1	SRR7949241	44491	25828412	25653109	24050544	15.9	SRR7949241
NKI PRAD (Stelloo et al., Nature Communications 2018)	P710T_H3K27ac_1	SRR7949186	55692	27637026	27077235	25644042	26.9	SRR7949186
NKI PRAD (Stelloo et al., Nature Communications 2018)	P717T_H3K27ac_1	SRR7949219	51270	22556420	22295140	21116704	21.6	SRR7949219
NKI PRAD (Stelloo et al., Nature Communications 2018)	P730T_H3K27ac_1	SRR7949187	54886	29792807	29215177	27557971	24.8	SRR7949187
NKI PRAD (Stelloo et al., Nature Communications 2018)	P737T_H3K27ac_1	SRR7949220	67427	41859346	41333370	38955584	35	SRR7949220
NKI PRAD (Stelloo et al., Nature Communications 2018)	P747T_H3K27ac_1	SRR7949221	48380	30612233	29414294	27665181	25	SRR7949221
NKI PRAD (Stelloo et al., Nature Communications 2018)	P779T_H3K27ac_1	SRR7949222	44025	22413041	21566554	20354008	19.2	SRR7949222
NKI PRAD (Stelloo et al., Nature Communications 2018)	P811T_H3K27ac_1	SRR7949179	46728	24883471	23929115	22661477	21.9	SRR7949179
NKI PRAD (Stelloo et al., Nature Communications 2018)	P823T_H3K27ac_1	SRR7949207	42444	17274517	17068627	16095227	16.8	SRR7949207
NKI PRAD (Stelloo et al., Nature Communications 2018)	P832T_H3K27ac_1	SRR7949223	51953	21712924	21043452	19906355	30.3	SRR7949223
NKI PRAD (Stelloo et al., Nature Communications 2018)	P223T_H3K27me3_1	SRR7949311	602	25047875	24765644	22331067	2	SRR7949311
NKI PRAD (Stelloo et al., Nature Communications 2018)	P228T_H3K27me3_1	SRR7949312	579	27626901	27071070	24467495	1.6	SRR7949312
NKI PRAD (Stelloo et al., Nature Communications 2018)	P229T_H3K27me3_1	SRR7949314	642	25255941	24740777	22151649	1.8	SRR7949314
NKI PRAD (Stelloo et al., Nature Communications 2018)	P230T_H3K27me3_1	SRR7949375	627	26140119	25535788	22963642	2.1	SRR7949375
NKI PRAD (Stelloo et al., Nature Communications 2018)	P245T_H3K27me3_1	SRR7949313	594	21621453	21166797	18905080	2	SRR7949313
NKI PRAD (Stelloo et al., Nature Communications 2018)	P249T_H3K27me3_1	SRR7949376	620	28407185	27586306	24741472	2.2	SRR7949376
NKI PRAD (Stelloo et al., Nature Communications 2018)	P254T_H3K27me3_1	SRR7949377	741	38623556	37773419	33982903	2.5	SRR7949377
NKI PRAD (Stelloo et al., Nature Communications 2018)	P261T_H3K27me3_1	SRR7949335	442	16993530	16854760	15297985	1.5	SRR7949335
NKI PRAD (Stelloo et al., Nature Communications 2018)	P263T_H3K27me3_1	SRR7949378	808	31405669	30831361	27332204	2.8	SRR7949378
NKI PRAD (Stelloo et al., Nature Communications 2018)	P265T_H3K27me3_1	SRR7949369	13071	22660416	22425789	20419432	2.8	SRR7949369
NKI PRAD (Stelloo et al., Nature Communications 2018)	P268T_H3K27me3_1	SRR7949352	395	23883846	23019316	21109431	0.9	SRR7949352
NKI PRAD (Stelloo et al., Nature Communications 2018)	P272T_H3K27me3_1	SRR7949379	642	30574366	30010344	26991987	2.2	SRR7949379
NKI PRAD (Stelloo et al., Nature Communications 2018)	P274T_H3K27me3_1	SRR7949380	429	13947993	13797512	12396633	2	SRR7949380
NKI PRAD (Stelloo et al., Nature Communications 2018)	P276T_H3K27me3_1	SRR7949315	698	31064385	29422513	26240559	2.3	SRR7949315
NKI PRAD (Stelloo et al., Nature Communications 2018)	P279T_H3K27me3_1	SRR7949381	573	28161291	27421548	24766751	1.8	SRR7949381
NKI PRAD (Stelloo et al., Nature Communications 2018)	P280T_H3K27me3_1	SRR7949382	582	24983818	24480914	22004123	2	SRR7949382
NKI PRAD (Stelloo et al., Nature Communications 2018)	P291T_H3K27me3_1	SRR7949383	580	19976939	19213017	17125999	1.9	SRR7949383
NKI PRAD (Stelloo et al., Nature Communications 2018)	P294T_H3K27me3_1	SRR7949370	744	23125081	22853906	20948272	1.7	SRR7949370
NKI PRAD (Stelloo et al., Nature Communications 2018)	P295T_H3K27me3_1	SRR7949384	802	31482372	30700134	27261472	2.5	SRR7949384
NKI PRAD (Stelloo et al., Nature Communications 2018)	P300T_H3K27me3_1	SRR7949347	723	32151464	30878874	27971615	1.5	SRR7949347
NKI PRAD (Stelloo et al., Nature Communications 2018)	P301T_H3K27me3_1	SRR7949340	703	36406512	35490768	31968643	1.7	SRR7949340
NKI PRAD (Stelloo et al., Nature Communications 2018)	P305T_H3K27me3_1	SRR7949346	641	29511621	28655116	25757482	1.9	SRR7949346
NKI PRAD (Stelloo et al., Nature Communications 2018)	P309T_H3K27me3_1	SRR7949351	495	23142463	22666593	20639125	1.3	SRR7949351
NKI PRAD (Stelloo et al., Nature Communications 2018)	P310T_H3K27me3_1	SRR7949350	619	27875545	27336994	24622331	1.8	SRR7949350
NKI PRAD (Stelloo et al., Nature Communications 2018)	P324T_H3K27me3_1	SRR7949341	643	27750251	26472811	23664881	2	SRR7949341
NKI PRAD (Stelloo et al., Nature Communications 2018)	P327T_H3K27me3_1	SRR7949310	591	24994525	24463288	21990559	2.1	SRR7949310
NKI PRAD (Stelloo et al., Nature Communications 2018)	P328T_H3K27me3_1	SRR7949342	667	35581480	33673998	30345659	1.8	SRR7949342
NKI PRAD (Stelloo et al., Nature Communications 2018)	P336T_H3K27me3_1	SRR7949385	738	30285807	29398177	26228484	2.3	SRR7949385
NKI PRAD (Stelloo et al., Nature Communications 2018)	P342T_H3K27me3_1	SRR7949330	752	36555027	35781703	31850446	2.4	SRR7949330
NKI PRAD (Stelloo et al., Nature Communications 2018)	P343T_H3K27me3_1	SRR7949343	706	30244444	28574996	25428238	2.2	SRR7949343
NKI PRAD (Stelloo et al., Nature Communications 2018)	P349T_H3K27me3_1	SRR7949344	649	26835305	25175973	22231819	2.4	SRR7949344
NKI PRAD (Stelloo et al., Nature Communications 2018)	P352T_H3K27me3_1	SRR7949316	519	26345012	25118327	22759552	1.5	SRR7949316
NKI PRAD (Stelloo et al., Nature Communications 2018)	P355T_H3K27me3_1	SRR7949371	647	23183332	22890714	20839781	1.9	SRR7949371
NKI PRAD (Stelloo et al., Nature Communications 2018)	P427T_H3K27me3_1	SRR7949331	439	18534876	18342436	16683780	1.5	SRR7949331
NKI PRAD (Stelloo et al., Nature Communications 2018)	P431T_H3K27me3_1	SRR7949336	968	42155483	41456363	36997907	2	SRR7949336
NKI PRAD (Stelloo et al., Nature Communications 2018)	P444T_H3K27me3_1	SRR7949337	490	17441021	17124695	15454738	1.8	SRR7949337
NKI PRAD (Stelloo et al., Nature Communications 2018)	P449T_H3K27me3_1	SRR7949332	464	20168274	19983005	18184281	1.4	SRR7949332
NKI PRAD (Stelloo et al., Nature Communications 2018)	P450T_H3K27me3_1	SRR7949348	578	23960087	23256660	20980835	1.7	SRR7949348
NKI PRAD (Stelloo et al., Nature Communications 2018)	P452T_H3K27me3_1	SRR7949360	459	20052545	19575429	17651052	1.7	SRR7949360
NKI PRAD (Stelloo et al., Nature Communications 2018)	P456T_H3K27me3_1	SRR7949338	462	23718941	23264054	21205081	1.3	SRR7949338
NKI PRAD (Stelloo et al., Nature Communications 2018)	P457T_H3K27me3_1	SRR7949339	448	18396421	17664560	15986428	1.8	SRR7949339
NKI PRAD (Stelloo et al., Nature Communications 2018)	P464T_H3K27me3_1	SRR7949361	595	19636978	19252288	17138654	2.1	SRR7949361
NKI PRAD (Stelloo et al., Nature Communications 2018)	P466T_H3K27me3_1	SRR7949322	580	22519274	21615761	19346432	2	SRR7949322
NKI PRAD (Stelloo et al., Nature Communications 2018)	P475T_H3K27me3_1	SRR7949323	510	19380186	18542881	16743961	1.7	SRR7949323
NKI PRAD (Stelloo et al., Nature Communications 2018)	P500T_H3K27me3_1	SRR7949333	295	9604170	9535085	8678384	1.1	SRR7949333
NKI PRAD (Stelloo et al., Nature Communications 2018)	P506T_H3K27me3_1	SRR7949349	480	17126529	16488073	14829598	1.6	SRR7949349
NKI PRAD (Stelloo et al., Nature Communications 2018)	P507T_H3K27me3_1	SRR7949324	614	38959995	38390043	34914016	1.3	SRR7949324
NKI PRAD (Stelloo et al., Nature Communications 2018)	P509T_H3K27me3_1	SRR7949325	673	34360650	33927898	30795203	1.6	SRR7949325
NKI PRAD (Stelloo et al., Nature Communications 2018)	P511T_H3K27me3_1	SRR7949317	479	19110748	18612120	16860614	1.4	SRR7949317
NKI PRAD (Stelloo et al., Nature Communications 2018)	P513T_H3K27me3_1	SRR7949318	544	21575003	20982122	18846423	2.1	SRR7949318
NKI PRAD (Stelloo et al., Nature Communications 2018)	P527T_H3K27me3_1	SRR7949326	615	24094506	23751782	21429841	1.6	SRR7949326
NKI PRAD (Stelloo et al., Nature Communications 2018)	P531T_H3K27me3_1	SRR7949362	567	22225989	21356892	19125831	1.8	SRR7949362
NKI PRAD (Stelloo et al., Nature Communications 2018)	P533T_H3K27me3_1	SRR7949319	568	21833439	21242373	19177328	1.4	SRR7949319
NKI PRAD (Stelloo et al., Nature Communications 2018)	P534T_H3K27me3_1	SRR7949320	669	31408314	30633256	27438414	2.2	SRR7949320
NKI PRAD (Stelloo et al., Nature Communications 2018)	P536T_H3K27me3_1	SRR7949353	628	34355929	33299633	30165489	1.6	SRR7949353
NKI PRAD (Stelloo et al., Nature Communications 2018)	P544T_H3K27me3_1	SRR7949372	9372	28552619	28281253	25832367	2.7	SRR7949372
NKI PRAD (Stelloo et al., Nature Communications 2018)	P552T_H3K27me3_1	SRR7949334	730	34899266	34243098	30593013	2.2	SRR7949334
NKI PRAD (Stelloo et al., Nature Communications 2018)	P555T_H3K27me3_1	SRR7949367	3103	24958629	24724919	22526637	2.3	SRR7949367
NKI PRAD (Stelloo et al., Nature Communications 2018)	P559T_H3K27me3_1	SRR7949363	524	25046484	24424077	22126720	1.5	SRR7949363
NKI PRAD (Stelloo et al., Nature Communications 2018)	P560T_H3K27me3_1	SRR7949364	686	30710824	29830606	26653403	2.1	SRR7949364
NKI PRAD (Stelloo et al., Nature Communications 2018)	P593T_H3K27me3_1	SRR7949365	639	31245921	30637920	27600997	1.9	SRR7949365
NKI PRAD (Stelloo et al., Nature Communications 2018)	P603T_H3K27me3_1	SRR7949366	522	23254440	22631253	20499468	1.5	SRR7949366
NKI PRAD (Stelloo et al., Nature Communications 2018)	P618T_H3K27me3_1	SRR7949327	460	16410613	16185996	14587053	1.6	SRR7949327
NKI PRAD (Stelloo et al., Nature Communications 2018)	P643T_H3K27me3_1	SRR7949354	675	36891138	36098962	32619544	1.8	SRR7949354
NKI PRAD (Stelloo et al., Nature Communications 2018)	P660T_H3K27me3_1	SRR7949368	620	20405518	20203327	18100254	2.6	SRR7949368
NKI PRAD (Stelloo et al., Nature Communications 2018)	P680T_H3K27me3_1	SRR7949373	33433	17554924	17386817	16361192	4.5	SRR7949373
NKI PRAD (Stelloo et al., Nature Communications 2018)	P695T_H3K27me3_1	SRR7949374	19326	31618459	31336117	28951475	3.2	SRR7949374
NKI PRAD (Stelloo et al., Nature Communications 2018)	P710T_H3K27me3_1	SRR7949328	500	28618711	28200428	25735383	1.2	SRR7949328
NKI PRAD (Stelloo et al., Nature Communications 2018)	P717T_H3K27me3_1	SRR7949355	635	26981753	25998948	23520876	1.4	SRR7949355
NKI PRAD (Stelloo et al., Nature Communications 2018)	P730T_H3K27me3_1	SRR7949329	682	28865337	28102588	25454890	1.5	SRR7949329
NKI PRAD (Stelloo et al., Nature Communications 2018)	P737T_H3K27me3_1	SRR7949356	748	25470019	24817784	22335845	1.7	SRR7949356
NKI PRAD (Stelloo et al., Nature Communications 2018)	P747T_H3K27me3_1	SRR7949357	781	40087162	39232215	35185261	2.2	SRR7949357
NKI PRAD (Stelloo et al., Nature Communications 2018)	P779T_H3K27me3_1	SRR7949358	571	29178422	28266247	25611416	1.4	SRR7949358
NKI PRAD (Stelloo et al., Nature Communications 2018)	P811T_H3K27me3_1	SRR7949321	489	25567446	24220535	21875544	1.5	SRR7949321
NKI PRAD (Stelloo et al., Nature Communications 2018)	P823T_H3K27me3_1	SRR7949345	901	18739856	17592546	15693683	1.6	SRR7949345
NKI PRAD (Stelloo et al., Nature Communications 2018)	P832T_H3K27me3_1	SRR7949359	602	28456069	27664868	25016811	1.6	SRR7949359
NKI PRAD (Stelloo et al., Nature Communications 2018)	P223T_H3K4me3_1	SRR7949254	5473	33604976	32965242	29804165	2.5	SRR7949254
NKI PRAD (Stelloo et al., Nature Communications 2018)	P227T_H3K4me3_1	SRR7949255	1697	27318627	26872619	23985400	2.8	SRR7949255
NKI PRAD (Stelloo et al., Nature Communications 2018)	P229T_H3K4me3_1	SRR7949256	13016	19186490	18725601	16372602	5.5	SRR7949256
NKI PRAD (Stelloo et al., Nature Communications 2018)	P230T_H3K4me3_1	SRR7949257	23834	27014483	26202037	22573628	12.3	SRR7949257
NKI PRAD (Stelloo et al., Nature Communications 2018)	P249T_H3K4me3_1	SRR7949258	24216	34645183	33521906	29209110	10.1	SRR7949258
NKI PRAD (Stelloo et al., Nature Communications 2018)	P254T_H3K4me3_1	SRR7949259	23163	25502242	24730951	21633797	9.4	SRR7949259
NKI PRAD (Stelloo et al., Nature Communications 2018)	P261T_H3K4me3_1	SRR7949260	17435	27662400	27206021	23364783	7.3	SRR7949260
NKI PRAD (Stelloo et al., Nature Communications 2018)	P263T_H3K4me3_1	SRR7949261	26267	25268030	24522457	21647523	14.2	SRR7949261
NKI PRAD (Stelloo et al., Nature Communications 2018)	P265T_H3K4me3_1	SRR7949262	2269	27748140	27419593	24282923	3.1	SRR7949262
NKI PRAD (Stelloo et al., Nature Communications 2018)	P268T_H3K4me3_1	SRR7949263	2199	13491610	13212716	11461206	4.4	SRR7949263
NKI PRAD (Stelloo et al., Nature Communications 2018)	P272T_H3K4me3_1	SRR7949264	23462	36822640	35696817	31495264	8.2	SRR7949264
NKI PRAD (Stelloo et al., Nature Communications 2018)	P274T_H3K4me3_1	SRR7949265	21264	30138047	29373900	25527715	8.3	SRR7949265
NKI PRAD (Stelloo et al., Nature Communications 2018)	P276T_H3K4me3_1	SRR7949266	6363	27910418	27399162	23456196	5.8	SRR7949266
NKI PRAD (Stelloo et al., Nature Communications 2018)	P279T_H3K4me3_1	SRR7949267	24934	29842285	28804123	25971346	18.6	SRR7949267
NKI PRAD (Stelloo et al., Nature Communications 2018)	P280T_H3K4me3_1	SRR7949268	24725	29681883	28566201	24855461	11.1	SRR7949268
NKI PRAD (Stelloo et al., Nature Communications 2018)	P291T_H3K4me3_1	SRR7949269	26013	20191552	19730095	17900742	25.6	SRR7949269
NKI PRAD (Stelloo et al., Nature Communications 2018)	P294T_H3K4me3_1	SRR7949270	10089	29429856	29124048	26066527	3.8	SRR7949270
NKI PRAD (Stelloo et al., Nature Communications 2018)	P295T_H3K4me3_1	SRR7949271	394	4982664	4844082	4292373	2.5	SRR7949271
NKI PRAD (Stelloo et al., Nature Communications 2018)	P298T_H3K4me3_1	SRR7949272	16976	13420330	12700941	10688091	9.6	SRR7949272
NKI PRAD (Stelloo et al., Nature Communications 2018)	P300T_H3K4me3_1	SRR7949273	11363	22856772	22305625	18499244	8	SRR7949273
NKI PRAD (Stelloo et al., Nature Communications 2018)	P301T_H3K4me3_1	SRR7949274	9077	18613631	18115831	15584508	5.9	SRR7949274
NKI PRAD (Stelloo et al., Nature Communications 2018)	P309T_H3K4me3_1	SRR7949275	15021	14643230	14317866	12442600	6.8	SRR7949275
NKI PRAD (Stelloo et al., Nature Communications 2018)	P310T_H3K4me3_1	SRR7949276	7168	18684152	17982479	15370306	5.7	SRR7949276
NKI PRAD (Stelloo et al., Nature Communications 2018)	P328T_H3K4me3_1	SRR7949277	850	16523159	15364610	13172797	4.5	SRR7949277
NKI PRAD (Stelloo et al., Nature Communications 2018)	P336T_H3K4me3_1	SRR7949278	26261	31975548	31259963	27975328	26.2	SRR7949278
NKI PRAD (Stelloo et al., Nature Communications 2018)	P355T_H3K4me3_1	SRR7949279	16274	32195368	31819539	28044713	5.5	SRR7949279
NKI PRAD (Stelloo et al., Nature Communications 2018)	P431T_H3K4me3_1	SRR7949280	19383	30047788	29539647	25191945	8.2	SRR7949280
NKI PRAD (Stelloo et al., Nature Communications 2018)	P433T_H3K4me3_1	SRR7949281	5549	23096131	22710219	19616279	4.8	SRR7949281
NKI PRAD (Stelloo et al., Nature Communications 2018)	P449T_H3K4me3_1	SRR7949282	20490	26097418	25675065	21907108	9.3	SRR7949282
NKI PRAD (Stelloo et al., Nature Communications 2018)	P456T_H3K4me3_1	SRR7949283	6769	29195302	28827395	25450253	3.8	SRR7949283
NKI PRAD (Stelloo et al., Nature Communications 2018)	P462T_H3K4me3_1	SRR7949284	1263	13113691	12935769	11311594	3.7	SRR7949284
NKI PRAD (Stelloo et al., Nature Communications 2018)	P500T_H3K4me3_1	SRR7949285	17335	23062346	22714350	19527923	7.7	SRR7949285
NKI PRAD (Stelloo et al., Nature Communications 2018)	P506T_H3K4me3_1	SRR7949286	17584	18047054	17376969	14626722	8.8	SRR7949286
NKI PRAD (Stelloo et al., Nature Communications 2018)	P507T_H3K4me3_1	SRR7949287	14082	27768297	27423931	24148392	5.5	SRR7949287
NKI PRAD (Stelloo et al., Nature Communications 2018)	P509T_H3K4me3_1	SRR7949288	15715	11736988	11550792	10017701	8	SRR7949288
NKI PRAD (Stelloo et al., Nature Communications 2018)	P511T_H3K4me3_1	SRR7949289	4407	23385803	22989364	19731474	4.7	SRR7949289
NKI PRAD (Stelloo et al., Nature Communications 2018)	P527T_H3K4me3_1	SRR7949290	25453	23035282	22655781	19555870	14	SRR7949290
NKI PRAD (Stelloo et al., Nature Communications 2018)	P533T_H3K4me3_1	SRR7949291	26992	26660878	26249521	22351580	17.9	SRR7949291
NKI PRAD (Stelloo et al., Nature Communications 2018)	P534T_H3K4me3_1	SRR7949292	11891	30829442	30424564	26679539	5	SRR7949292
NKI PRAD (Stelloo et al., Nature Communications 2018)	P536T_H3K4me3_1	SRR7949293	5773	23746317	22895675	19448692	5.8	SRR7949293
NKI PRAD (Stelloo et al., Nature Communications 2018)	P540T_H3K4me3_1	SRR7949294	1880	29933564	29591536	26310220	2.9	SRR7949294
NKI PRAD (Stelloo et al., Nature Communications 2018)	P541T_H3K4me3_1	SRR7949295	19707	22558743	22268666	19607571	7.6	SRR7949295
NKI PRAD (Stelloo et al., Nature Communications 2018)	P544T_H3K4me3_1	SRR7949296	12184	27998492	27661619	24562990	4.6	SRR7949296
NKI PRAD (Stelloo et al., Nature Communications 2018)	P555T_H3K4me3_1	SRR7949297	19278	30183904	29822798	26509749	6.1	SRR7949297
NKI PRAD (Stelloo et al., Nature Communications 2018)	P643T_H3K4me3_1	SRR7949298	19176	25316041	24748023	21104445	8.4	SRR7949298
NKI PRAD (Stelloo et al., Nature Communications 2018)	P660T_H3K4me3_1	SRR7949299	719	19570506	19326266	17101655	3	SRR7949299
NKI PRAD (Stelloo et al., Nature Communications 2018)	P680T_H3K4me3_1	SRR7949300	3272	24437910	24175569	21548135	3.1	SRR7949300
NKI PRAD (Stelloo et al., Nature Communications 2018)	P695T_H3K4me3_1	SRR7949301	18269	11681943	11164466	9650784	10.5	SRR7949301
NKI PRAD (Stelloo et al., Nature Communications 2018)	P710T_H3K4me3_1	SRR7949302	23476	20643169	20359528	17717194	11.6	SRR7949302
NKI PRAD (Stelloo et al., Nature Communications 2018)	P717T_H3K4me3_1	SRR7949303	19773	22018739	21542862	18452378	7.9	SRR7949303
NKI PRAD (Stelloo et al., Nature Communications 2018)	P730T_H3K4me3_1	SRR7949304	19530	23800332	23407930	20092715	8.3	SRR7949304
NKI PRAD (Stelloo et al., Nature Communications 2018)	P737T_H3K4me3_1	SRR7949305	27250	27422558	26774363	22653884	20.9	SRR7949305
NKI PRAD (Stelloo et al., Nature Communications 2018)	P747T_H3K4me3_1	SRR7949306	4226	31304211	30754128	26622074	4.6	SRR7949306
NKI PRAD (Stelloo et al., Nature Communications 2018)	P779T_H3K4me3_1	SRR7949307	2474	18837140	18369390	15769262	4.6	SRR7949307
NKI PRAD (Stelloo et al., Nature Communications 2018)	P823T_H3K4me3_1	SRR7949308	686	14147402	13583577	11720216	4.1	SRR7949308
NKI PRAD (Stelloo et al., Nature Communications 2018)	P832T_H3K4me3_1	SRR7949309	20024	16706022	16254006	13456442	11	SRR7949309
DFCI PDXs (Baca et al., Nature Communications 2021)	UW_IN_PDX_136	GSM4928626	NA	53297210	52123573	47453247	NA	GSM4928626
DFCI PDXs (Baca et al., Nature Communications 2021)	UW_IN_PDX_141	GSM4928627	NA	65316178	63340747	59036743	NA	GSM4928627
DFCI PDXs (Baca et al., Nature Communications 2021)	UW_IN_PDX_167	GSM4928631	NA	42601101	41927369	38704523	NA	GSM4928631
DFCI PDXs (Baca et al., Nature Communications 2021)	UW_IN_PDX_1703	GSM4928633	NA	63990147	61714808	56998187	NA	GSM4928633
DFCI PDXs (Baca et al., Nature Communications 2021)	UW_IN_PDX_170_2	GSM4928632	NA	46993355	43640482	40278046	NA	GSM4928632
DFCI PDXs (Baca et al., Nature Communications 2021)	UW_IN_PDX_189_3	GSM4928637	NA	53345092	51839807	48413568	NA	GSM4928637
DFCI PDXs (Baca et al., Nature Communications 2021)	UW_IN_PDX_189_4	GSM4928638	NA	30427401	29871537	27647267	NA	GSM4928638
DFCI PDXs (Baca et al., Nature Communications 2021)	UW_IN_PDX_35	NONE	NA	37950343	34817468	33414675	NA	NONE
DFCI PDXs (Baca et al., Nature Communications 2021)	UW_IN_PDX_58	GSM4928641	NA	59376511	57405567	53463236	NA	GSM4928641
DFCI PDXs (Baca et al., Nature Communications 2021)	UW_IN_PDX_70	GSM4928643	NA	56712248	54376088	50039546	NA	GSM4928643
DFCI PDXs (Baca et al., Nature Communications 2021)	UW_IN_PDX_77	GSM4928645	NA	53310888	50457657	46733687	NA	GSM4928645
DFCI PDXs (Baca et al., Nature Communications 2021)	UW_IN_PDX_78	GSM4928647	NA	47250463	44517327	41114536	NA	GSM4928647
DFCI PDXs (Baca et al., Nature Communications 2021)	UW_IN_PDX_81	GSM4928649	NA	41349211	38858461	35933017	NA	GSM4928649
DFCI PDXs (Baca et al., Nature Communications 2021)	UW_IN_PDX_862	GSM4928650	NA	48777461	37448757	34446272	NA	GSM4928650
DFCI PDXs (Baca et al., Nature Communications 2021)	UW_IN_PDX_92	GSM4928651	NA	33196330	32904580	30294817	NA	GSM4928651

## Sheet: Table S3
Table S3. Integrative genetic models of AR binding
FILE	ID	CHR	P0	P1		BEST.GWAS.ID	BEST.GWAS.Z	EQTL.ID	EQTL.R2	EQTL.Z	EQTL.GWAS.Z	NSNP	NWGT	MODEL	MODELCV.R2	MODELCV.PV	TWAS.Z	TWAS.P
analysis/predict/WEIGHTS//chr1:100080600-100081200.wgt.RDat	chr1:100080600-100081200	1	100080600	100081200		rs1338574	1.858	rs834979	-0.0604	3.064	0.08571	25	1	top1	0.051	0.0055	0.08571	0.932
analysis/predict/WEIGHTS//chr1:100272300-100272950.wgt.RDat	chr1:100272300-100272950	1	100272300	100272950		rs7543433	2.103	rs12121352	-0.0288	-2.49	-0.39273	18	1	top1.qtl	0.039	0.014	0.05952	0.953
analysis/predict/WEIGHTS//chr1:100817850-100818200.wgt.RDat	chr1:100817850-100818200	1	100817850	100818200		rs11166437	2.175	rs6577168	0.0842	3.086	0.30769	25	1	top1	0.042	0.011	0.30769	0.758
analysis/predict/WEIGHTS//chr1:100884850-100885350.wgt.RDat	chr1:100884850-100885350	1	100884850	100885350		rs479269	-1.7	rs3767830	-0.0154	2.652	0.85437	8	1	top1.qtl	0.042	0.01	0.66019	0.509
analysis/predict/WEIGHTS//chr1:101339800-101340500.wgt.RDat	chr1:101339800-101340500	1	101339800	101340500		rs12039319	-2.287	rs17123491	-0.0324	2.215	1.11966	22	16	lasso.plasma	0.038	0.014	1.26789	0.205
analysis/predict/WEIGHTS//chr1:10270350-10270600.wgt.RDat	chr1:10270350-10270600	1	10270350	10270600		rs4846197	-3.373	rs6691645	0.0334	1.976	-2.6612	9	1	top1.qtl	0.039	0.014	-2.6612	0.00779
analysis/predict/WEIGHTS//chr1:105426750-105427350.wgt.RDat	chr1:105426750-105427350	1	105426750	105427350		rs7411085	1.4	rs7542735	0.194	3.344	0.1573	14	1	top1	0.044	0.0092	0.1573	0.875
analysis/predict/WEIGHTS//chr1:105496050-105496950.wgt.RDat	chr1:105496050-105496950	1	105496050	105496950		rs7550524	-0.964	rs11184372	-0.0193	-1.665	-0.91463	16	1	top1.as	0.2385	0.00061	0.77049	0.441
analysis/predict/WEIGHTS//chr1:106075900-106076300.wgt.RDat	chr1:106075900-106076300	1	106075900	106076300		rs1404020	-2.178	rs1404027	0.0115	3.16	-1.92079	23	1	top1	0.075	0.00089	-1.92079	0.0548
analysis/predict/WEIGHTS//chr1:106115300-106115950.wgt.RDat	chr1:106115300-106115950	1	106115300	106115950		rs777084	2.295	rs2037608	0.485	0.967	-0.29885	24	1	top1	0.4846	0.01	-0.29885	0.765
analysis/predict/WEIGHTS//chr1:106818950-106819550.wgt.RDat	chr1:106818950-106819550	1	106818950	106819550		rs4431871	1.864	rs7524060	0.128	4.402	1.57143	31	4	lasso	0.072	0.0011	0.79402	0.427
analysis/predict/WEIGHTS//chr1:107084050-107084700.wgt.RDat	chr1:107084050-107084700	1	107084050	107084700		rs12140817	-1.63	rs12035987	0.4081	-3.464	-1.45055	13	6	lasso.as	0.069	0.0014	0.80953	0.418
analysis/predict/WEIGHTS//chr1:107186750-107187400.wgt.RDat	chr1:107186750-107187400	1	107186750	107187400		rs10881427	1.099	rs12137532	0.4	6.957	0.45238	21	1	top1.as	0.19	8.4e-08	0.45238	0.651
analysis/predict/WEIGHTS//chr1:10734950-10735600.wgt.RDat	chr1:10734950-10735600	1	10734950	10735600		rs12567769	-0.813	rs516243	0.335	1.082	0.17284	11	1	top1.as	0.524	0.0012	0.71605	0.474
analysis/predict/WEIGHTS//chr1:108225000-108225600.wgt.RDat	chr1:108225000-108225600	1	108225000	108225600		rs2494059	-2.328	rs2504469	-0.0337	-3.046	1.91566	34	1	top1.qtl	0.0381	0.014	-1.91566	0.0554
analysis/predict/WEIGHTS//chr1:108245450-108246150.wgt.RDat	chr1:108245450-108246150	1	108245450	108246150		rs2494059	-2.328	rs7530592	0.0049	3.021	-1.50602	30	1	top1.as	0.14	0.0072	-1.61628	0.106
analysis/predict/WEIGHTS//chr1:108630100-108630650.wgt.RDat	chr1:108630100-108630650	1	108630100	108630650		rs11185248	1.625	rs1660433	-0.0453	2.211	-0.36782	35	1	top1.as	0.2889	0.0048	-1.17822	0.239
analysis/predict/WEIGHTS//chr1:110090950-110091400.wgt.RDat	chr1:110090950-110091400	1	110090950	110091400		rs532623	1.087	rs577953	-0.047	-2.499	-0.00971	18	3	lasso	0.059	0.003	-0.43388	0.664
analysis/predict/WEIGHTS//chr1:111177250-111177700.wgt.RDat	chr1:111177250-111177700	1	111177250	111177700		rs2640493	4.204	rs4839072	0.135014	2.488	-0.83674	25	15	lasso.as	0.071	0.0012	4.15094	3.31e-05
analysis/predict/WEIGHTS//chr1:111341250-111342100.wgt.RDat	chr1:111341250-111342100	1	111341250	111342100		rs343819	4.56	rs343819	-0.0193	3.029	4.56044	21	1	top1	0.052	0.0049	4.56044	5.1e-06
analysis/predict/WEIGHTS//chr1:112050800-112051300.wgt.RDat	chr1:112050800-112051300	1	112050800	112051300		rs12038000	-2.44	rs4839143	0.089344	1.976	0.63918	34	15	lasso.as	0.4107	0.0018	0.71229	0.476
analysis/predict/WEIGHTS//chr1:11212050-11212750.wgt.RDat	chr1:11212050-11212750	1	11212050	11212750		rs2275527	-2.198	rs1057079	0.064	3.575	-1.72826	7	3	lasso.plasma	0.062	0.0023	-1.95323	0.0508
analysis/predict/WEIGHTS//chr1:112135600-112136050.wgt.RDat	chr1:112135600-112136050	1	112135600	112136050		rs2800883	3.244	rs2247867	0.378	-3.005	-0.39456	29	1	top1	0.378	0.011	0.39456	0.693
analysis/predict/WEIGHTS//chr1:112383700-112384400.wgt.RDat	chr1:112383700-112384400	1	112383700	112384400		rs10494140	-2.319	rs546760	0.281	6.864	-0.14286	28	14	lasso.plasma	0.43	6.3e-18	0.25367	0.8
analysis/predict/WEIGHTS//chr1:112427600-112428100.wgt.RDat	chr1:112427600-112428100	1	112427600	112428100		rs1891716	2.398	rs1805222	0.100376	-2.143	-0.26804	38	13	lasso.as	0.597	0.0016	-1.52682	0.127
analysis/predict/WEIGHTS//chr1:112491150-112491850.wgt.RDat	chr1:112491150-112491850	1	112491150	112491850		rs9429614	-2.713	rs1893737	0.215	-5.014	1.54348	54	3	lasso	0.222	5.1e-05	0.51349	0.608
analysis/predict/WEIGHTS//chr1:113072100-113072350.wgt.RDat	chr1:113072100-113072350	1	113072100	113072350		rs6537742	-2.28	rs351367	-0.0339	-1.524	1.55952	18	10	lasso.plasma	0.07	0.0013	-0.64125	0.521
analysis/predict/WEIGHTS//chr1:113137000-113137650.wgt.RDat	chr1:113137000-113137650	1	113137000	113137650		rs12406906	-2.22	rs6671645	0.00328	3.142	-1.17978	8	1	top1.as	0.051	0.0052	-1.17978	0.238
analysis/predict/WEIGHTS//chr1:113242850-113243150.wgt.RDat	chr1:113242850-113243150	1	113242850	113243150		rs2279500	-1.551	rs954679	-0.0107	-3.103	-1.28049	18	1	top1.as	0.0417	0.011	1.28049	0.2
analysis/predict/WEIGHTS//chr1:113448300-113448850.wgt.RDat	chr1:113448300-113448850	1	113448300	113448850		rs12727968	-1.562	rs6537763	0.102	2.58	0.41053	20	1	top1.as	0.053	0.0047	-1.07229	0.284
analysis/predict/WEIGHTS//chr1:113477250-113477650.wgt.RDat	chr1:113477250-113477650	1	113477250	113477650		rs7552903	1.278	rs7169	0.427	0.731	-1.09639	12	1	top1	0.4273	0.012	-1.09639	0.273
analysis/predict/WEIGHTS//chr1:113615200-113615950.wgt.RDat	chr1:113615200-113615950	1	113615200	113615950		rs12136941	-1.285	rs1766862	-0.0114	2.728	-0.67857	8	1	top1	0.041	0.011	-0.67857	0.497
analysis/predict/WEIGHTS//chr1:113785000-113785650.wgt.RDat	chr1:113785000-113785650	1	113785000	113785650		rs2147599	2.238	rs773615	-0.0202	-2.536	-0.16092	19	1	top1	0.043	0.0096	0.16092	0.872
analysis/predict/WEIGHTS//chr1:113898400-113898850.wgt.RDat	chr1:113898400-113898850	1	113898400	113898850		rs11102621	2.745	rs17013288	0.757	-1.903	-2	26	1	top1	0.757	2.7e-05	2	0.0455
analysis/predict/WEIGHTS//chr1:11482050-11482600.wgt.RDat	chr1:11482050-11482600	1	11482050	11482600		rs11585441	2.014	rs877307	0.261	-1.409	-0.43333	29	1	top1.as	0.2688	0.011	-0.91534	0.36
analysis/predict/WEIGHTS//chr1:114977600-114978250.wgt.RDat	chr1:114977600-114978250	1	114977600	114978250		rs11582563	0.87	rs6671587	-0.00955	2.962	-0.49438	14	1	top1	0.0683	0.0014	-0.49438	0.621
analysis/predict/WEIGHTS//chr1:115618450-115618900.wgt.RDat	chr1:115618450-115618900	1	115618450	115618900		rs1627205	-3.678	rs17478965	0.391	-4.715	-3.55814	49	1	top1	0.11	8.4e-05	3.55814	0.000373
analysis/predict/WEIGHTS//chr1:11629500-11630250.wgt.RDat	chr1:11629500-11630250	1	11629500	11630250		rs2817644	1.049	rs2745275	0.199	3.095	0.59732	17	6	lasso.plasma	0.2992	0.0074	0.12818	0.898
analysis/predict/WEIGHTS//chr1:116676200-116677250.wgt.RDat	chr1:116676200-116677250	1	116676200	116677250		rs17425127	1.85	rs1146359	-0.0184	3.094	-0.57333	12	1	top1	0.06	0.0027	-0.57333	0.566
analysis/predict/WEIGHTS//chr1:117018750-117019550.wgt.RDat	chr1:117018750-117019550	1	117018750	117019550		rs17576615	1.567	rs12406751	0.0466	2.926	-1.04386	22	1	top1.as	0.1453	0.0034	-0.44828	0.654
analysis/predict/WEIGHTS//chr1:117531450-117531900.wgt.RDat	chr1:117531450-117531900	1	117531450	117531900		rs12038029	-2.031	rs1127215	0.0251	-5.352	0.27711	32	8	lasso	0.285	2.7e-11	-0.62571	0.532
analysis/predict/WEIGHTS//chr1:117569000-117569500.wgt.RDat	chr1:117569000-117569500	1	117569000	117569500		rs12038029	-2.031	rs12121509	-0.0323	-3.22	-0.14159	23	1	top1.qtl	0.099	0.00014	0.14159	0.887
analysis/predict/WEIGHTS//chr1:117671250-117671750.wgt.RDat	chr1:117671250-117671750	1	117671250	117671750		rs1048635	-2.658	rs7546885	-0.0189	1.386	-1.89888	21	1	top1.qtl	0.04	0.012	-0.42466	0.671
analysis/predict/WEIGHTS//chr1:118133850-118134350.wgt.RDat	chr1:118133850-118134350	1	118133850	118134350		rs1975283	1.207	rs10489819	0.0624	-2.891	-0.19266	31	2	lasso.plasma	0.064	0.0019	0.38484	0.7
analysis/predict/WEIGHTS//chr1:118601950-118602550.wgt.RDat	chr1:118601950-118602550	1	118601950	118602550		rs12124243	2.1	rs10923477	0.414	6.576	1.67073	10	1	top1	0.22	8.6e-09	1.67073	0.0948
analysis/predict/WEIGHTS//chr1:11967800-11968600.wgt.RDat	chr1:11967800-11968600	1	11967800	11968600		rs6691499	1.891	rs2639453	0.0226	-2.287	1.29	20	1	top1.qtl	0.0951	0.0076	1.76744	0.0772
analysis/predict/WEIGHTS//chr1:120160700-120161100.wgt.RDat	chr1:120160700-120161100	1	120160700	120161100		rs10494227	2.383	rs10494227	0.216	3.505	2.38318	24	1	top1	0.216	0.00087	2.38318	0.0172
analysis/predict/WEIGHTS//chr1:120190550-120191300.wgt.RDat	chr1:120190550-120191300	1	120190550	120191300		rs662243	3.284	rs347905	0.468	2.697	0.72	18	1	top1.as	0.48357	0.0032	0.72	0.472
analysis/predict/WEIGHTS//chr1:120310650-120311100.wgt.RDat	chr1:120310650-120311100	1	120310650	120311100		rs1441008	1.977	rs1441008	0.004966	-1.873	1.97674	14	2	lasso.as	0.298	0.0034	-2.23434	0.0255
analysis/predict/WEIGHTS//chr1:121184600-121185500.wgt.RDat	chr1:121184600-121185500	1	121184600	121185500		rs6600673	-0.927	rs4844381	0.367965	-6.017	-0.06024	9	1	lasso.as	0.21	1.6e-08	0.06024	0.952
analysis/predict/WEIGHTS//chr1:121288450-121289800.wgt.RDat	chr1:121288450-121289800	1	121288450	121289800		rs2222371	-0.578	rs11249429	0.156367	-4.573	-0.48193	8	5	lasso.as	0.23818	0.00012	-0.72065	0.471
analysis/predict/WEIGHTS//chr1:12248800-12249350.wgt.RDat	chr1:12248800-12249350	1	12248800	12249350		rs474247	-3.136	rs1061624	-0.00537	1.681	-0.96154	25	1	top1	0.0434	0.0094	-0.96154	0.336
analysis/predict/WEIGHTS//chr1:12523900-12525000.wgt.RDat	chr1:12523900-12525000	1	12523900	12525000		rs12746212	-1.918	rs12125606	0.343	1.292	-0.59794	10	1	top1	0.3434	0.00039	-0.59794	0.55
analysis/predict/WEIGHTS//chr1:12655800-12656250.wgt.RDat	chr1:12655800-12656250	1	12655800	12656250		rs7535209	-1.928	rs4846126	-0.051	2.312	1.32099	23	1	top1.qtl	0.047	0.007	1.8642	0.0623
analysis/predict/WEIGHTS//chr1:12657750-12658250.wgt.RDat	chr1:12657750-12658250	1	12657750	12658250		rs7535209	-1.928	rs4846128	0.0565	-4.466	-0.51191	24	1	top1	0.1	0.00013	0.51191	0.609
analysis/predict/WEIGHTS//chr1:13946200-13946950.wgt.RDat	chr1:13946200-13946950	1	13946200	13946950		rs17390097	2.875	rs1767676	0.0387	-3.531	0.21591	38	1	lasso.plasma	0.1294	0.0021	-0.21591	0.829
analysis/predict/WEIGHTS//chr1:14461500-14462100.wgt.RDat	chr1:14461500-14462100	1	14461500	14462100		rs7519796	-1.354	rs7546559	0.285	-7.319	0.06098	33	1	top1	0.27	1.1e-10	-0.06098	0.951
analysis/predict/WEIGHTS//chr1:146547950-146548400.wgt.RDat	chr1:146547950-146548400	1	146547950	146548400		rs4950354	2.108	rs535827	0.0313	5.536	1.83158	27	1	top1	0.294	1.1e-11	1.83158	0.067
analysis/predict/WEIGHTS//chr1:147113850-147114450.wgt.RDat	chr1:147113850-147114450	1	147113850	147114450		rs2236570	-2.471	rs3766509	0.017	1.465	-1.76543	31	1	top1.qtl	0.046	0.0077	-0.00885	0.993
analysis/predict/WEIGHTS//chr1:147137200-147137900.wgt.RDat	chr1:147137200-147137900	1	147137200	147137900		rs12119079	-2.429	rs1578723	0.381	-2.966	0.86154	26	1	top1.as	0.5669	0.0039	-0.60227	0.547
analysis/predict/WEIGHTS//chr1:14748500-14748950.wgt.RDat	chr1:14748500-14748950	1	14748500	14748950		rs4661493	-2.854	rs7531416	0.391	-6.473	0.97727	27	18	lasso.plasma	0.27	1.4e-10	-0.10137	0.919
analysis/predict/WEIGHTS//chr1:14825150-14825900.wgt.RDat	chr1:14825150-14825900	1	14825150	14825900		rs10927452	-1.407	rs6673698	-0.00413	1.45	0.28431	27	1	top1	0.0615	0.0024	0.28431	0.776
analysis/predict/WEIGHTS//chr1:14976450-14977000.wgt.RDat	chr1:14976450-14977000	1	14976450	14977000		rs761192	-1.768	rs2038164	-0.0411	2.882	-1.42718	19	1	top1	0.051	0.0054	-1.42718	0.154
analysis/predict/WEIGHTS//chr1:150533550-150534900.wgt.RDat	chr1:150533550-150534900	1	150533550	150534900		rs12034302	-6.7	rs11810419	-0.0494	2.112	-0.16547	16	1	top1.as	0.4992	0.00019	-0.16547	0.869
analysis/predict/WEIGHTS//chr1:153606000-153606950.wgt.RDat	chr1:153606000-153606950	1	153606000	153606950		rs3806233	-1.348	rs9330299	-0.0277	2.954	0.34091	26	1	top1	0.04	0.012	0.34091	0.733
analysis/predict/WEIGHTS//chr1:153630950-153631400.wgt.RDat	chr1:153630950-153631400	1	153630950	153631400		rs3795396	1.402	rs28580554	0.0256	-0.613	1.17241	20	1	top1	0.071	0.0012	-1.17241	0.241
analysis/predict/WEIGHTS//chr1:154309850-154310500.wgt.RDat	chr1:154309850-154310500	1	154309850	154310500		rs1194584	2.169	rs6696089	0.0578	2.665	-0.82418	28	3	lasso.plasma	0.038	0.015	-2.02489	0.0429
analysis/predict/WEIGHTS//chr1:154600350-154600750.wgt.RDat	chr1:154600350-154600750	1	154600350	154600750		rs7541282	-2.844	rs7533471	-0.00577	-1.584	-2.80208	12	1	top1.qtl	0.068	0.0015	-1.55814	0.119
analysis/predict/WEIGHTS//chr1:155197150-155197500.wgt.RDat	chr1:155197150-155197500	1	155197150	155197500		rs35154152	-3.662	rs2075569	0.00697	2.887	-1.59091	14	1	top1.qtl	0.042	0.01	0.4875	0.626
analysis/predict/WEIGHTS//chr1:155214300-155214900.wgt.RDat	chr1:155214300-155214900	1	155214300	155214900		rs12034326	-1.92	rs2049805	0.236	-2.918	-0.4875	14	1	top1.qtl	0.044	0.0093	0.4875	0.626
analysis/predict/WEIGHTS//chr1:155231950-155232450.wgt.RDat	chr1:155231950-155232450	1	155231950	155232450		rs12034326	-1.92	rs12049375	-0.0909	-0.842	0.24176	16	1	top1.qtl	0.053	0.0045	0.13043	0.896
analysis/predict/WEIGHTS//chr1:156163550-156164050.wgt.RDat	chr1:156163550-156164050	1	156163550	156164050		rs4661035	-3.922	rs7534339	-0.0371	1.178	1.57778	20	1	top1.qtl	0.042	0.01	-1.83529	0.0665
analysis/predict/WEIGHTS//chr1:156710800-156711350.wgt.RDat	chr1:156710800-156711350	1	156710800	156711350		rs11264534	-4.14	rs12023776	-0.0464	1.894	-0.44555	18	5	lasso.plasma	0.055	0.0039	-1.69227	0.0906
analysis/predict/WEIGHTS//chr1:157389500-157390250.wgt.RDat	chr1:157389500-157390250	1	157389500	157390250		rs1970101	-1.885	rs4971147	-0.0324	-2.648	-0.43023	31	1	top1.qtl	0.05	0.0059	0.43023	0.667
analysis/predict/WEIGHTS//chr1:158166200-158166750.wgt.RDat	chr1:158166200-158166750	1	158166200	158166750		rs691314	1.235	rs859013	0.513	-3.226	0.3622	27	1	top1	0.5126	0.0074	-0.3622	0.717
analysis/predict/WEIGHTS//chr1:158814150-158814550.wgt.RDat	chr1:158814150-158814550	1	158814150	158814550		rs2188114	1.513	rs2188114	-0.0668	2.851	1.51261	14	5	lasso.plasma	0.044	0.009	0.8316	0.406
analysis/predict/WEIGHTS//chr1:15929950-15930350.wgt.RDat	chr1:15929950-15930350	1	15929950	15930350		rs6429759	1.827	rs6697813	0.00954	0.77	0.42268	13	1	top1	0.0442	0.0089	0.42268	0.673
analysis/predict/WEIGHTS//chr1:160126850-160127600.wgt.RDat	chr1:160126850-160127600	1	160126850	160127600		rs11265343	-2.543	rs7541968	0.422	8.116	-0.06667	45	11	lasso.plasma	0.35	4.6e-14	-1.04826	0.295
analysis/predict/WEIGHTS//chr1:160171600-160172250.wgt.RDat	chr1:160171600-160172250	1	160171600	160172250		rs6427505	-2.062	rs2795070	-0.0148	-3.489	-0.90588	18	3	lasso	0.2234	0.0057	0.73614	0.462
analysis/predict/WEIGHTS//chr1:160858700-160859250.wgt.RDat	chr1:160858700-160859250	1	160858700	160859250		rs7411035	3.159	rs4656956	0.042	-1.967	2.72727	24	1	top1.qtl	0.059	0.003	-2.62791	0.00859
analysis/predict/WEIGHTS//chr1:16147250-16147850.wgt.RDat	chr1:16147250-16147850	1	16147250	16147850		rs4661654	-4	rs4661661	-0.00842	2.407	3	18	1	top1	0.0393	0.013	3	0.0027
analysis/predict/WEIGHTS//chr1:16162150-16162750.wgt.RDat	chr1:16162150-16162750	1	16162150	16162750		rs4661344	-3.977	rs10737911	-0.02	1.582	1.8642	12	1	top1.as	0.1102	0.012	-3.97656	6.99e-05
analysis/predict/WEIGHTS//chr1:163351550-163352050.wgt.RDat	chr1:163351550-163352050	1	163351550	163352050		rs1995785	-2.355	rs3013502	0.115	4.899	-0.25301	40	1	top1	0.16	1.4e-06	-0.25301	0.8
analysis/predict/WEIGHTS//chr1:1655600-1656100.wgt.RDat	chr1:1655600-1656100	1	1655600	1656100		rs4648764	1.574	rs2294488	-0.0401	0.887	-1.1236	5	1	top1	0.069	0.0014	-1.1236	0.261
analysis/predict/WEIGHTS//chr1:165585100-165586100.wgt.RDat	chr1:165585100-165586100	1	165585100	165586100		rs6694924	-2	rs12128974	0.284	4.321	0.37121	26	1	top1.as	0.296	1.2e-05	0.37121	0.71
analysis/predict/WEIGHTS//chr1:16563500-16563900.wgt.RDat	chr1:16563500-16563900	1	16563500	16563900		rs12751725	-2.146	rs4661729	-0.0168	-1.233	-1.11905	18	1	top1	0.04	0.012	1.11905	0.263
analysis/predict/WEIGHTS//chr1:166578850-166579450.wgt.RDat	chr1:166578850-166579450	1	166578850	166579450		rs714339	-1.252	rs486929	0.00513	-3.64	0.69412	46	1	top1.qtl	0.069	0.0014	-0.69412	0.488
analysis/predict/WEIGHTS//chr1:167094600-167095300.wgt.RDat	chr1:167094600-167095300	1	167094600	167095300		rs11806848	-3.833	rs2281959	0.0683	-3.52	2.47312	38	1	top1.as	0.115	0.012	-2.47312	0.0134
analysis/predict/WEIGHTS//chr1:167132150-167132600.wgt.RDat	chr1:167132150-167132600	1	167132150	167132600		rs10494471	3.051	rs1027495	0.101	3.94	-1.48193	58	1	top1.qtl	0.108	6.9e-05	0.92391	0.356
analysis/predict/WEIGHTS//chr1:167158150-167158950.wgt.RDat	chr1:167158150-167158950	1	167158150	167158950		rs10918667	3.763	rs16858608	-0.00997	2.631	0.92391	39	1	top1.as	0.0774	0.011	3.05085	0.00228
analysis/predict/WEIGHTS//chr1:167683600-167684000.wgt.RDat	chr1:167683600-167684000	1	167683600	167684000		rs3767445	3.474	rs1999842	0.576	1.015	-0.52632	24	1	top1	0.5761	0.0022	-0.52632	0.599
analysis/predict/WEIGHTS//chr1:167845750-167846150.wgt.RDat	chr1:167845750-167846150	1	167845750	167846150		rs3738236	1.033	rs203847	-0.024	-3.865	0.33333	22	1	top1.qtl	0.097	0.00017	-0.33333	0.739
analysis/predict/WEIGHTS//chr1:16839900-16841050.wgt.RDat	chr1:16839900-16841050	1	16839900	16841050		rs7537985	3.186	rs696605	0.224	-4.276	0.92683	3	1	top1.qtl	0.13	1.2e-05	-0.92683	0.354
analysis/predict/WEIGHTS//chr1:168525850-168526250.wgt.RDat	chr1:168525850-168526250	1	168525850	168526250		rs11580138	1.463	rs10918925	0.0269	-4.954	0.68293	20	1	top1	0.23	3.5e-09	-0.68293	0.495
analysis/predict/WEIGHTS//chr1:168529450-168530200.wgt.RDat	chr1:168529450-168530200	1	168529450	168530200		rs11580138	1.463	rs1024176	-0.0188	-2.353	0.76829	21	1	top1.qtl	0.057	0.0033	-0.76829	0.442
analysis/predict/WEIGHTS//chr1:168604400-168605100.wgt.RDat	chr1:168604400-168605100	1	168604400	168605100		rs2064300	2.626	rs7551639	0.147	-4.827	-1.68235	36	1	top1	0.11	5.7e-05	1.68235	0.0925
analysis/predict/WEIGHTS//chr1:168832850-168833450.wgt.RDat	chr1:168832850-168833450	1	168832850	168833450		rs857633	2.506	rs1322494	0.0357	3.367	-2.02679	27	1	top1	0.076	0.00079	-2.02679	0.0427
analysis/predict/WEIGHTS//chr1:168876050-168876800.wgt.RDat	chr1:168876050-168876800	1	168876050	168876800		rs7514435	-2.964	rs7514435	-0.0995	-1.333	-2.96429	24	1	top1.qtl	0.069	0.0014	1.22472	0.221
analysis/predict/WEIGHTS//chr1:169478050-169479050.wgt.RDat	chr1:169478050-169479050	1	169478050	169479050		rs2901092	-2.309	rs12408451	-0.025	-1.938	-0.29546	32	1	top1.as	0.2033	0.0018	-1.2659	0.206
analysis/predict/WEIGHTS//chr1:169537550-169538250.wgt.RDat	chr1:169537550-169538250	1	169537550	169538250		rs12120605	1.651	rs12120605	-0.026303	2.444	1.65068	47	4	lasso.as	0.1265	0.015	-0.36966	0.712
analysis/predict/WEIGHTS//chr1:169543500-169544200.wgt.RDat	chr1:169543500-169544200	1	169543500	169544200		rs12120605	1.651	rs12755775	0.11	-2.059	0.71515	54	1	top1.as	0.076	0.0008	-0.71515	0.475
analysis/predict/WEIGHTS//chr1:170194650-170195300.wgt.RDat	chr1:170194650-170195300	1	170194650	170195300		rs16863106	1.363	rs1332950	0.0565	2.758	0.80435	37	1	top1.as	0.3806	0.0084	-0.63303	0.527
analysis/predict/WEIGHTS//chr1:170855650-170856150.wgt.RDat	chr1:170855650-170856150	1	170855650	170856150		rs10489244	-1.672	rs10489244	0.276	2.922	-1.67227	23	1	top1.as	0.4706	0.0038	-1.67227	0.0945
analysis/predict/WEIGHTS//chr1:170903500-170904000.wgt.RDat	chr1:170903500-170904000	1	170903500	170904000		rs12089701	-2.047	rs6681553	0.271	4.726	-0.69767	27	1	top1	0.15	2.6e-06	-0.69767	0.485
analysis/predict/WEIGHTS//chr1:171322400-171323150.wgt.RDat	chr1:171322400-171323150	1	171322400	171323150		rs6670627	1.163	rs7541966	-0.021	-2.044	-0.16936	21	1	top1.qtl	0.1404	0.0051	0.62222	0.534
analysis/predict/WEIGHTS//chr1:172435600-172436150.wgt.RDat	chr1:172435600-172436150	1	172435600	172436150		rs2901656	2.16	rs6680035	-0.0125	2.36	-1.53608	44	1	top1.qtl	0.0562	0.0036	-1.87952	0.0602
analysis/predict/WEIGHTS//chr1:172439050-172439800.wgt.RDat	chr1:172439050-172439800	1	172439050	172439800		rs16844620	-2.221	rs4244193	0.481	5.595	-1.41837	45	1	top1	0.19	7.5e-08	-1.41837	0.156
analysis/predict/WEIGHTS//chr1:172501550-172502500.wgt.RDat	chr1:172501550-172502500	1	172501550	172502500		rs1557561	1.07	rs7531652	-0.005	1.168	0.72414	21	1	top1.qtl	0.044	0.0091	-0.07317	0.942
analysis/predict/WEIGHTS//chr1:172715300-172716250.wgt.RDat	chr1:172715300-172716250	1	172715300	172716250		rs2022168	1.476	rs12119745	-0.00938	-1.463	-0.5	17	1	top1.qtl	0.2639	0.0031	-1	0.317
analysis/predict/WEIGHTS//chr1:174083200-174083750.wgt.RDat	chr1:174083200-174083750	1	174083200	174083750		rs17353212	-1.547	rs1407127	0.366	-6.626	-0.07778	9	1	top1.as	0.31	1.6e-12	0.07778	0.938
analysis/predict/WEIGHTS//chr1:175041600-175042150.wgt.RDat	chr1:175041600-175042150	1	175041600	175042150		rs6667611	1.25	rs12065394	0.427	2.957	0.90654	29	1	top1	0.4267	0.0026	0.90654	0.365
analysis/predict/WEIGHTS//chr1:176176350-176176600.wgt.RDat	chr1:176176350-176176600	1	176176350	176176600		rs791801	-2.448	rs12143425	0.239	-1.592	0.12057	14	1	top1.qtl	0.049	0.0063	-0.12057	0.904
analysis/predict/WEIGHTS//chr1:176536300-176537150.wgt.RDat	chr1:176536300-176537150	1	176536300	176537150		rs11580857	-1.44	rs11585020	-0.0117	3.06	-0.73636	22	1	top1.qtl	0.1072	0.015	-0.93694	0.349
analysis/predict/WEIGHTS//chr1:176713100-176713650.wgt.RDat	chr1:176713100-176713650	1	176713100	176713650		rs10913245	-1.817	rs12128792	-0.055	-1.644	-1.72642	17	1	top1.qtl	0.04	0.012	1.72642	0.0843
analysis/predict/WEIGHTS//chr1:178116400-178117050.wgt.RDat	chr1:178116400-178117050	1	178116400	178117050		rs316265	-1.391	rs316265	-0.014202	1.295	-1.39098	10	2	lasso.as	0.222	0.0077	-1.16146	0.245
analysis/predict/WEIGHTS//chr1:178922150-178922500.wgt.RDat	chr1:178922150-178922500	1	178922150	178922500		rs7522225	-2.141	rs10913647	-0.0429	1.968	-0.45963	19	1	top1.as	0.236	0.013	0.15672	0.875
analysis/predict/WEIGHTS//chr1:179501200-179501750.wgt.RDat	chr1:179501200-179501750	1	179501200	179501750		rs928016	-1.642	rs2209922	0.0272	-4.244	0.69136	33	10	lasso.plasma	0.125	1.9e-05	-0.31874	0.75
analysis/predict/WEIGHTS//chr1:180095700-180096300.wgt.RDat	chr1:180095700-180096300	1	180095700	180096300		rs17371566	3.675	rs12130489	0.212	0.86	1.16949	25	1	top1.qtl	0.051	0.0052	2.8211	0.00479
analysis/predict/WEIGHTS//chr1:180497550-180498600.wgt.RDat	chr1:180497550-180498600	1	180497550	180498600		rs946635	-1.277	rs7517902	0.0201	1.471	0.69893	27	1	top1.as	0.1297	0.0024	-0.56129	0.575
analysis/predict/WEIGHTS//chr1:180562500-180562950.wgt.RDat	chr1:180562500-180562950	1	180562500	180562950		rs10798783	-1.483	rs3843276	0.0777	-3.342	0.22353	31	4	lasso	0.5281	0.0027	-0.49767	0.619
analysis/predict/WEIGHTS//chr1:180600050-180600700.wgt.RDat	chr1:180600050-180600700	1	180600050	180600700		rs16856306	-1.007	rs12402575	-0.00256	2.893	-0.55208	22	6	lasso.plasma	0.045	0.0084	-0.48948	0.624
analysis/predict/WEIGHTS//chr1:180600750-180601300.wgt.RDat	chr1:180600750-180601300	1	180600750	180601300		rs16856306	-1.007	rs6661325	-0.00357	-2.533	-0.48315	22	1	top1.as	0.32553	0.0099	0.48315	0.629
analysis/predict/WEIGHTS//chr1:181998400-181998900.wgt.RDat	chr1:181998400-181998900	1	181998400	181998900		rs3908801	-2.286	rs6700658	0.152	3.367	0.83132	15	9	lasso.plasma	0.051	0.0055	0.8264	0.409
analysis/predict/WEIGHTS//chr1:182358600-182359200.wgt.RDat	chr1:182358600-182359200	1	182358600	182359200		rs11576932	-1.01	rs2333151	0.102	4.254	-0.73333	33	5	lasso.plasma	0.204	0.0034	-0.6022	0.547
analysis/predict/WEIGHTS//chr1:18238250-18238800.wgt.RDat	chr1:18238250-18238800	1	18238250	18238800		rs6686929	-0.598	rs1537773	-0.0387	-1.846	0.12621	32	21	lasso	0.072	0.0011	0.45823	0.647
analysis/predict/WEIGHTS//chr1:182671950-182672450.wgt.RDat	chr1:182671950-182672450	1	182671950	182672450		rs621071	1.591	rs508607	0.249292	-4.843	1.46512	6	5	lasso.as	0.113	4.7e-05	-0.58778	0.557
analysis/predict/WEIGHTS//chr1:182938200-182938900.wgt.RDat	chr1:182938200-182938900	1	182938200	182938900		rs9425569	-3.859	rs12048692	0.0412	3.333	0.61864	18	1	top1	0.081	0.00055	0.61864	0.536
analysis/predict/WEIGHTS//chr1:182991400-182991900.wgt.RDat	chr1:182991400-182991900	1	182991400	182991900		rs4652769	-4.704	rs4454510	-0.0264	-1.064	-4.55556	19	1	top1.qtl	0.0395	0.013	-4.55556	5.22e-06
analysis/predict/WEIGHTS//chr1:183057950-183058750.wgt.RDat	chr1:183057950-183058750	1	183057950	183058750		rs6672306	-4.716	rs12739316	-0.0251	-1.224	4.10976	23	1	top1	0.039	0.013	-4.10976	3.96e-05
analysis/predict/WEIGHTS//chr1:183604600-183605100.wgt.RDat	chr1:183604600-183605100	1	183604600	183605100		rs11755	0.593	rs2761558	-0.00671	-1.778	0.19753	14	9	lasso	0.065	0.0019	-0.03869	0.969
analysis/predict/WEIGHTS//chr1:184319950-184320700.wgt.RDat	chr1:184319950-184320700	1	184319950	184320700		rs9425336	3.928	rs9425336	0.207	-6.433	3.92771	37	1	top1.as	0.22	5.5e-09	-3.85542	0.000116
analysis/predict/WEIGHTS//chr1:184435000-184435400.wgt.RDat	chr1:184435000-184435400	1	184435000	184435400		rs11805001	3.623	rs12120604	0.365	-3.47	2.56911	20	1	top1	0.044	0.0091	-2.56911	0.0102
analysis/predict/WEIGHTS//chr1:184510500-184511200.wgt.RDat	chr1:184510500-184511200	1	184510500	184511200		rs10489729	3.909	rs1339566	0.21	6.894	3.07229	13	9	lasso	0.32	1.3e-12	0.81431	0.415
analysis/predict/WEIGHTS//chr1:184512400-184512850.wgt.RDat	chr1:184512400-184512850	1	184512400	184512850		rs10489729	3.909	rs1339566	-0.0529	2.603	3.07229	13	7	lasso	0.0569	0.0034	1.87666	0.0606
analysis/predict/WEIGHTS//chr1:184559250-184560000.wgt.RDat	chr1:184559250-184560000	1	184559250	184560000		rs16823313	3.782	rs10911621	0.0235	2.615	-0.42202	21	1	top1.qtl	0.1721	0.012	-3.1087	0.00188
analysis/predict/WEIGHTS//chr1:184575850-184576450.wgt.RDat	chr1:184575850-184576450	1	184575850	184576450		rs6696816	-2.708	rs6696816	0.0967	-4.774	-2.70787	19	6	lasso	0.15	3.3e-06	2.73114	0.00631
analysis/predict/WEIGHTS//chr1:184619550-184620200.wgt.RDat	chr1:184619550-184620200	1	184619550	184620200		rs4498770	0.963	rs10797982	0.144	-1.817	0.46667	14	1	top1.qtl	0.052	0.0051	0.74286	0.458
analysis/predict/WEIGHTS//chr1:184726800-184727650.wgt.RDat	chr1:184726800-184727650	1	184726800	184727650		rs41535944	1.935	rs861587	0.07	3.643	0.11628	22	5	lasso	0.5142	0.00043	-0.01752	0.986
analysis/predict/WEIGHTS//chr1:184759800-184760650.wgt.RDat	chr1:184759800-184760650	1	184759800	184760650		rs41535944	1.935	rs7528626	-0.0161	1.318	1.2236	31	1	top1.as	0.1218	0.0087	-0.27907	0.78
analysis/predict/WEIGHTS//chr1:184770550-184771150.wgt.RDat	chr1:184770550-184771150	1	184770550	184771150		rs28927681	1.59	rs338563	0.0169	2.648	-0.38	28	5	lasso.plasma	0.073	0.001	-0.68561	0.493
analysis/predict/WEIGHTS//chr1:184833150-184833800.wgt.RDat	chr1:184833150-184833800	1	184833150	184833800		rs569243	2.538	rs540983	0.181843	3.494	0.3375	37	3	lasso.as	0.0483	0.0065	1.10413	0.27
analysis/predict/WEIGHTS//chr1:184898850-184900050.wgt.RDat	chr1:184898850-184900050	1	184898850	184900050		rs4650671	1.7	rs7537119	-0.0211	1.479	-0.55294	22	1	top1.qtl	0.038	0.015	-1.45	0.147
analysis/predict/WEIGHTS//chr1:185026350-185026950.wgt.RDat	chr1:185026350-185026950	1	185026350	185026950		rs2378957	1.699	rs12408279	-0.0994	-1.526	-1	15	1	top1.qtl	0.61761	0.002	0.95402	0.34
analysis/predict/WEIGHTS//chr1:18528300-18528950.wgt.RDat	chr1:18528300-18528950	1	18528300	18528950		rs4920461	-2.453	rs9725311	0.101	3.508	-0.23864	28	1	top1.as	0.2319	0.00031	1.60377	0.109
analysis/predict/WEIGHTS//chr1:185503700-185504700.wgt.RDat	chr1:185503700-185504700	1	185503700	185504700		rs10798019	-2.521	rs7542383	0.0746	5.853	0.65882	21	1	top1.qtl	0.253	4.8e-10	0.65882	0.51
analysis/predict/WEIGHTS//chr1:186966600-186967450.wgt.RDat	chr1:186966600-186967450	1	186966600	186967450		rs10737278	-2.43	rs2273169	0.0536	2.625	-2.40698	26	1	top1.qtl	0.206	0.0041	1.352	0.176
analysis/predict/WEIGHTS//chr1:187418650-187419150.wgt.RDat	chr1:187418650-187419150	1	187418650	187419150		rs6671435	1.512	rs12037050	0.165	4.434	1.49462	27	1	top1.qtl	0.12	2.8e-05	1.49462	0.135
analysis/predict/WEIGHTS//chr1:187434500-187434950.wgt.RDat	chr1:187434500-187434950	1	187434500	187434950		rs6671435	1.512	rs1938522	-0.0388	-3.466	-0.03371	32	1	top1.qtl	0.071	0.0012	0.16854	0.866
analysis/predict/WEIGHTS//chr1:187446200-187447100.wgt.RDat	chr1:187446200-187447100	1	187446200	187447100		rs6671435	1.512	rs2383623	0.125	-4.56	-0.88372	31	1	top1	0.09	0.00029	0.88372	0.377
analysis/predict/WEIGHTS//chr1:187661900-187662450.wgt.RDat	chr1:187661900-187662450	1	187661900	187662450		rs2891292	1.932	rs3127507	0.397	-3.746	-1.62651	34	1	top1	0.3974	0.0039	1.62651	0.104
analysis/predict/WEIGHTS//chr1:187728950-187729850.wgt.RDat	chr1:187728950-187729850	1	187728950	187729850		rs10912174	2.061	rs2495444	0.040156	-4.456	0.30233	29	5	lasso.as	0.0655	0.0018	-0.24049	0.81
analysis/predict/WEIGHTS//chr1:187751150-187751700.wgt.RDat	chr1:187751150-187751700	1	187751150	187751700		rs10912174	2.061	rs10912183	0.0696	-2.887	-0.27193	26	8	lasso	0.074	0.00097	-0.29088	0.771
analysis/predict/WEIGHTS//chr1:18790650-18791700.wgt.RDat	chr1:18790650-18791700	1	18790650	18791700		rs3007727	2.33	rs11261020	-0.00589	4.354	-0.56627	48	1	top1.qtl	0.12	2.8e-05	-0.56627	0.571
analysis/predict/WEIGHTS//chr1:18806600-18807150.wgt.RDat	chr1:18806600-18807150	1	18806600	18807150		rs3007727	2.33	rs12061708	0.0447	-3.346	-0.29885	43	1	top1.qtl	0.1885	0.003	0.29885	0.765
analysis/predict/WEIGHTS//chr1:188748500-188749050.wgt.RDat	chr1:188748500-188749050	1	188748500	188749050		rs4417067	-1.544	rs4417067	0.0523	1.983	-1.54444	11	1	top1.qtl	0.085	0.00041	-1.54444	0.122
analysis/predict/WEIGHTS//chr1:190457150-190457700.wgt.RDat	chr1:190457150-190457700	1	190457150	190457700		rs1171049	0.977	rs814945	0.0946	2.276	-0.77108	23	1	top1.qtl	0.044	0.0091	-0.77108	0.441
analysis/predict/WEIGHTS//chr1:190557000-190557800.wgt.RDat	chr1:190557000-190557800	1	190557000	190557800		rs1170920	2.079	rs10753949	0.01	1.743	-0.35714	32	8	lasso	0.038	0.014	1.75498	0.0793
analysis/predict/WEIGHTS//chr1:192718600-192719000.wgt.RDat	chr1:192718600-192719000	1	192718600	192719000		rs6428134	1.025	rs1933701	-0.0713	0.729	-1	12	1	top1	0.041	0.012	-1	0.317
analysis/predict/WEIGHTS//chr1:192813250-192814150.wgt.RDat	chr1:192813250-192814150	1	192813250	192814150		rs1231741	1.461	rs7550636	0.0928	1.192	-0.05682	19	1	top1.qtl	0.1165	0.012	-1.28879	0.197
analysis/predict/WEIGHTS//chr1:192830550-192831700.wgt.RDat	chr1:192830550-192831700	1	192830550	192831700		rs1231741	1.461	rs1237767	0.429	-8.333	1.32222	21	1	top1.qtl	0.35	2.8e-14	-1.34444	0.179
analysis/predict/WEIGHTS//chr1:193823950-193824500.wgt.RDat	chr1:193823950-193824500	1	193823950	193824500		rs7527816	-1.337	rs10737633	-0.0728	-1.933	-0.68807	20	1	top1.qtl	0.044	0.0088	-0.725	0.468
analysis/predict/WEIGHTS//chr1:19638500-19638950.wgt.RDat	chr1:19638500-19638950	1	19638500	19638950		rs1621294	2.26	rs9729157	0.0289	2.32	2.04545	26	1	top1.qtl	0.068	0.0015	2.04545	0.0408
analysis/predict/WEIGHTS//chr1:19751250-19751800.wgt.RDat	chr1:19751250-19751800	1	19751250	19751800		rs6703297	-1.607	rs17398986	0.13	-5.464	1.30928	43	1	top1	0.17	6.1e-07	-1.30928	0.19
analysis/predict/WEIGHTS//chr1:19763100-19763700.wgt.RDat	chr1:19763100-19763700	1	19763100	19763700		rs6703297	-1.607	rs12137160	0.317	7.532	0.29348	37	1	top1	0.32	5.9e-13	0.29348	0.769
analysis/predict/WEIGHTS//chr1:19770800-19771300.wgt.RDat	chr1:19770800-19771300	1	19770800	19771300		rs6703297	-1.607	rs4912096	0.0842	4.327	0.32609	39	1	top1	0.081	0.00055	0.32609	0.744
analysis/predict/WEIGHTS//chr1:19811800-19812650.wgt.RDat	chr1:19811800-19812650	1	19811800	19812650		rs16862800	-2.266	rs6664461	0.0308	-2.707	1.45977	26	1	top1.qtl	0.0499	0.0058	-0.27174	0.786
analysis/predict/WEIGHTS//chr1:19874200-19874800.wgt.RDat	chr1:19874200-19874800	1	19874200	19874800		rs1572824	0.573	rs12123337	0.147	3.317	-0.57229	17	1	top1	0.049	0.0062	-0.57229	0.567
analysis/predict/WEIGHTS//chr1:19887700-19888100.wgt.RDat	chr1:19887700-19888100	1	19887700	19888100		rs1572824	0.573	rs12566505	0.0136	-1.969	0.34559	12	4	lasso.plasma	0.065	0.0019	0.04552	0.964
analysis/predict/WEIGHTS//chr1:199550750-199551400.wgt.RDat	chr1:199550750-199551400	1	199550750	199551400		rs2786734	-2.318	rs2812263	0.165	1.816	-2.02105	20	1	top1	0.165	0.0015	-2.02105	0.0433
analysis/predict/WEIGHTS//chr1:20080800-20081500.wgt.RDat	chr1:20080800-20081500	1	20080800	20081500		rs1983602	1.994	rs1782469	-0.0433	-1.735	-0.17204	26	1	top1.qtl	0.045	0.0086	0.41803	0.676
analysis/predict/WEIGHTS//chr1:20102650-20103350.wgt.RDat	chr1:20102650-20103350	1	20102650	20103350		rs1983602	1.994	rs1266439	-0.0195	-3.338	1.68627	18	1	top1.qtl	0.056	0.0036	-1.99371	0.0462
analysis/predict/WEIGHTS//chr1:201235400-201236300.wgt.RDat	chr1:201235400-201236300	1	201235400	201236300		rs854493	3.63	rs832177	0.225136	2.07	1.84426	42	1	lasso.as	0.3027	0.0071	0.46061	0.645
analysis/predict/WEIGHTS//chr1:201250250-201251900.wgt.RDat	chr1:201250250-201251900	1	201250250	201251900		rs854493	3.63	rs854493	0.0165	3.279	3.62963	41	1	top1.qtl	0.0391	0.013	3.62963	0.000284
analysis/predict/WEIGHTS//chr1:201278350-201279600.wgt.RDat	chr1:201278350-201279600	1	201278350	201279600		rs10920176	2.72	rs1257394	-0.0137	2.834	-0.42975	43	9	lasso.plasma	0.057	0.0033	-0.45501	0.649
analysis/predict/WEIGHTS//chr1:201665300-201665950.wgt.RDat	chr1:201665300-201665950	1	201665300	201665950		rs10800790	-1.476	rs531606	0.0492	1.947	-0.52817	23	1	top1.qtl	0.1771	0.015	1.39506	0.163
analysis/predict/WEIGHTS//chr1:20198700-20199200.wgt.RDat	chr1:20198700-20199200	1	20198700	20199200		rs17397143	-1.376	rs12121573	-0.028017	2.246	-0.40476	18	1	lasso.as	0.1714	0.011	-0.51191	0.609
analysis/predict/WEIGHTS//chr1:202003850-202004650.wgt.RDat	chr1:202003850-202004650	1	202003850	202004650		rs6656470	1.488	rs6656470	-0.0124	-2.711	1.48837	13	1	top1	0.042	0.01	-1.48837	0.137
analysis/predict/WEIGHTS//chr1:202829700-202830300.wgt.RDat	chr1:202829700-202830300	1	202829700	202830300		rs4950949	2.419	rs6688903	-0.00116	1.404	1.33544	24	1	top1.qtl	0.072	0.0011	1.33544	0.182
analysis/predict/WEIGHTS//chr1:203274450-203274900.wgt.RDat	chr1:203274450-203274900	1	203274450	203274900		rs12406229	1.504	rs7513835	-0.000901	-2.337	0.25909	19	1	top1	0.0439	0.0091	-0.25909	0.796
analysis/predict/WEIGHTS//chr1:203379500-203380100.wgt.RDat	chr1:203379500-203380100	1	203379500	203380100		rs6681328	1.887	rs6701513	0.0235	4.226	0.15854	28	13	lasso.plasma	0.13	1e-05	-0.66302	0.507
analysis/predict/WEIGHTS//chr1:20498600-20499200.wgt.RDat	chr1:20498600-20499200	1	20498600	20499200		rs818571	1.277	rs7542968	0.00291	2.053	-0.55454	18	2	lasso.plasma	0.1489	0.0036	-0.41551	0.678
analysis/predict/WEIGHTS//chr1:205091050-205091650.wgt.RDat	chr1:205091050-205091650	1	205091050	205091650		rs11240356	1.865	rs3183297	-0.0263	-2.892	-1.42553	22	4	lasso.plasma	0.062	0.0024	1.99318	0.0462
analysis/predict/WEIGHTS//chr1:205335100-205335550.wgt.RDat	chr1:205335100-205335550	1	205335100	205335550		rs11581020	-2.264	rs11240466	-0.0525	1.721	-1	37	24	lasso	0.3113	0.0062	0.05849	0.953
analysis/predict/WEIGHTS//chr1:205339950-205340350.wgt.RDat	chr1:205339950-205340350	1	205339950	205340350		rs11581020	-2.264	rs12059162	0.672742	-3.69	2.02857	36	14	lasso.as	0.7475	7.6e-05	-1.78601	0.0741
analysis/predict/WEIGHTS//chr1:20539400-20539850.wgt.RDat	chr1:20539400-20539850	1	20539400	20539850		rs7514659	-0.897	rs7514659	-0.0717	-1.766	-0.89682	18	1	top1.as	0.053	0.0046	-0.42391	0.672
analysis/predict/WEIGHTS//chr1:205671950-205672750.wgt.RDat	chr1:205671950-205672750	1	205671950	205672750		rs1172198	-5.633	rs4601639	0.0228	-2.413	4.78889	15	1	top1.as	0.0952	0.011	-4.8	1.59e-06
analysis/predict/WEIGHTS//chr1:205794050-205794700.wgt.RDat	chr1:205794050-205794700	1	205794050	205794700		rs1361754	4.734	rs708730	0.0523	1.278	1.53333	27	1	top1.qtl	0.1236	0.0046	2.72289	0.00647
analysis/predict/WEIGHTS//chr1:207177450-207178750.wgt.RDat	chr1:207177450-207178750	1	207177450	207178750		rs901107	1.859	rs4844563	0.0827	6.504	0.35632	20	1	top1	0.423	1.7e-17	0.35632	0.722
analysis/predict/WEIGHTS//chr1:208123950-208124600.wgt.RDat	chr1:208123950-208124600	1	208123950	208124600		rs490305	-3.254	rs11118965	0.0664	-3.269	-0.95506	25	1	top1.qtl	0.1176	0.0086	1.97674	0.0481
analysis/predict/WEIGHTS//chr1:208228850-208229500.wgt.RDat	chr1:208228850-208229500	1	208228850	208229500		rs905100	1.101	rs4844634	0.314	4.424	0.76596	36	1	top1	0.314	0.0004	0.76596	0.444
analysis/predict/WEIGHTS//chr1:209545050-209545550.wgt.RDat	chr1:209545050-209545550	1	209545050	209545550		rs1857966	-1.273	rs11585992	0.226	1.475	1.11443	14	1	top1.qtl	0.4228	0.0095	1.11443	0.265
analysis/predict/WEIGHTS//chr1:209918300-209918850.wgt.RDat	chr1:209918300-209918850	1	209918300	209918850		rs11119343	0.94	rs4844891	0.121662	1.803	0.36842	27	4	lasso.as	0.3397	0.0033	-0.08026	0.936
analysis/predict/WEIGHTS//chr1:210558000-210558350.wgt.RDat	chr1:210558000-210558350	1	210558000	210558350		rs4844522	-1.116	rs4845010	0.038	3.104	-0.95652	41	1	top1.as	0.068	0.0014	-0.64706	0.518
analysis/predict/WEIGHTS//chr1:210592600-210593250.wgt.RDat	chr1:210592600-210593250	1	210592600	210593250		rs12070523	1.047	rs3753226	0.073985	3.893	-0.3494	38	7	lasso.as	0.115	0.0057	-0.00679	0.995
analysis/predict/WEIGHTS//chr1:211685200-211685750.wgt.RDat	chr1:211685200-211685750	1	211685200	211685750		rs17017564	-2.65	rs6693000	0.085	4.017	-1.30208	36	1	top1.as	0.2569	0.00016	-0.34921	0.727
analysis/predict/WEIGHTS//chr1:211908100-211908600.wgt.RDat	chr1:211908100-211908600	1	211908100	211908600		rs3862952	-2.181	rs11585946	-0.00526	2.211	0.54667	23	1	top1.qtl	0.0691	0.0014	1.17526	0.24
analysis/predict/WEIGHTS//chr1:212120900-212121500.wgt.RDat	chr1:212120900-212121500	1	212120900	212121500		rs17699790	-2.512	rs2808388	-0.0148	1.37	2.35465	12	1	top1.as	0.29	0.0021	0.48235	0.63
analysis/predict/WEIGHTS//chr1:212375100-212375500.wgt.RDat	chr1:212375100-212375500	1	212375100	212375500		rs11119872	1.681	rs6703980	-0.00825	2.45	1.42938	27	1	top1.qtl	0.063	0.0021	1.42938	0.153
analysis/predict/WEIGHTS//chr1:21287700-21288200.wgt.RDat	chr1:21287700-21288200	1	21287700	21288200		rs3767248	2.663	rs3767248	0.474	-8.744	2.6625	6	1	top1	0.62	9.5e-30	-2.6625	0.00776
analysis/predict/WEIGHTS//chr1:213832850-213833400.wgt.RDat	chr1:213832850-213833400	1	213832850	213833400		rs12144639	-1.546	rs17021189	0.00895	2.691	-0.7663	30	8	lasso	0.11	8.1e-05	0.56141	0.575
analysis/predict/WEIGHTS//chr1:214756400-214756850.wgt.RDat	chr1:214756400-214756850	1	214756400	214756850		rs7535253	2.04	rs2666850	-0.0503	-2.128	0.64122	23	1	top1.as	0.298	0.014	-0.56061	0.575
analysis/predict/WEIGHTS//chr1:214757100-214757850.wgt.RDat	chr1:214757100-214757850	1	214757100	214757850		rs7535253	2.04	rs2807650	0.0451	0.924	-0.26667	23	1	top1.qtl	0.043	0.0098	-0.64122	0.521
analysis/predict/WEIGHTS//chr1:21594300-21594900.wgt.RDat	chr1:21594300-21594900	1	21594300	21594900		rs212541	-1.494	rs212534	0.245	1.532	0.46914	28	1	top1.qtl	0.051	0.0054	0.76056	0.447
analysis/predict/WEIGHTS//chr1:216500550-216501050.wgt.RDat	chr1:216500550-216501050	1	216500550	216501050		rs7534889	1.159	rs10864238	0.173	-4.516	0.14118	12	1	top1.as	0.13	1.3e-05	-1.1457	0.252
analysis/predict/WEIGHTS//chr1:21664550-21665650.wgt.RDat	chr1:21664550-21665650	1	21664550	21665650		rs3026792	2.358	rs2796355	0.143	-1.859	0.77381	28	1	top1	0.1427	0.0061	-0.77381	0.439
analysis/predict/WEIGHTS//chr1:217249800-217250400.wgt.RDat	chr1:217249800-217250400	1	217249800	217250400		rs7518494	2.266	rs1339207	-0.0575	-2.564	1.91176	47	1	top1.qtl	0.048	0.0066	-1.91176	0.0559
analysis/predict/WEIGHTS//chr1:217696550-217697000.wgt.RDat	chr1:217696550-217697000	1	217696550	217697000		rs17046538	-1.33	rs4846415	0.046	1.751	0.60714	10	1	top1.qtl	0.078	0.00067	0.60714	0.544
analysis/predict/WEIGHTS//chr1:217699200-217700050.wgt.RDat	chr1:217699200-217700050	1	217699200	217700050		rs17046538	-1.33	rs12408022	-0.0431	-1.942	1.06186	10	1	top1.qtl	0.0673	0.0016	-1.06186	0.288
analysis/predict/WEIGHTS//chr1:218458400-218458800.wgt.RDat	chr1:218458400-218458800	1	218458400	218458800		rs12034536	-1.628	rs35231305	-0.0374	-1.248	-0.84444	11	1	top1.as	0.2272	0.015	0.84444	0.398
analysis/predict/WEIGHTS//chr1:21866400-21866900.wgt.RDat	chr1:21866400-21866900	1	21866400	21866900		rs12141569	-2.148	rs7547128	0.423	-6.747	-2.06098	36	1	top1	0.31	1.9e-12	2.06098	0.0393
analysis/predict/WEIGHTS//chr1:218744600-218745350.wgt.RDat	chr1:218744600-218745350	1	218744600	218745350		rs1932971	-1.457	rs17048147	0.0169	3.198	0.32941	18	1	top1.qtl	0.052	0.0051	0.32941	0.742
analysis/predict/WEIGHTS//chr1:218797950-218798450.wgt.RDat	chr1:218797950-218798450	1	218797950	218798450		rs17048282	1.593	rs1481364	0.488	3.37	-0.23967	15	1	top1.as	0.543	0.0014	-0.23141	0.817
analysis/predict/WEIGHTS//chr1:219001400-219001950.wgt.RDat	chr1:219001400-219001950	1	219001400	219001950		rs11118161	-0.69	rs10746380	0.315	6.558	-0.22892	26	6	lasso	0.25	9.1e-10	0.15938	0.873
analysis/predict/WEIGHTS//chr1:219299500-219300150.wgt.RDat	chr1:219299500-219300150	1	219299500	219300150		rs10863428	-1.772	rs7545152	-0.0212	1.815	1.56075	13	1	top1.as	0.3874	0.01	0.70732	0.479
analysis/predict/WEIGHTS//chr1:219351200-219351800.wgt.RDat	chr1:219351200-219351800	1	219351200	219351800		rs1847661	-1.722	rs4846532	0.2	1.336	0.66667	16	1	top1	0.1996	0.0069	0.66667	0.505
analysis/predict/WEIGHTS//chr1:21951900-21952550.wgt.RDat	chr1:21951900-21952550	1	21951900	21952550		rs829417	1.889	rs4654975	-0.0441	1.828	-1.02222	37	18	lasso.as	0.037	0.015	1.07423	0.283
analysis/predict/WEIGHTS//chr1:21960400-21961500.wgt.RDat	chr1:21960400-21961500	1	21960400	21961500		rs829417	1.889	rs12083062	-0.0025	-1.47	-1.88701	32	1	top1.qtl	0.2087	0.013	-0.42708	0.669
analysis/predict/WEIGHTS//chr1:219641750-219642300.wgt.RDat	chr1:219641750-219642300	1	219641750	219642300		rs2605110	-1.736	rs2605098	0.0113	4.534	-1.51163	32	3	lasso	0.139	6.6e-06	-1.67127	0.0947
analysis/predict/WEIGHTS//chr1:219694550-219695250.wgt.RDat	chr1:219694550-219695250	1	219694550	219695250		rs2785989	2.007	rs12034581	0.275	6.628	0.04938	25	1	top1.as	0.17	4.6e-07	0.04938	0.961
analysis/predict/WEIGHTS//chr1:220146150-220146450.wgt.RDat	chr1:220146150-220146450	1	220146150	220146450		rs1768668	-0.978	rs2047451	0.272	-4.971	-0.02381	25	1	top1.qtl	0.12	2e-05	0.03571	0.972
analysis/predict/WEIGHTS//chr1:221480650-221481050.wgt.RDat	chr1:221480650-221481050	1	221480650	221481050		rs2996003	2.794	rs11118691	0.232	-5.598	-2.15217	22	1	top1	0.2	3.6e-08	2.15217	0.0314
analysis/predict/WEIGHTS//chr1:221915400-221916250.wgt.RDat	chr1:221915400-221916250	1	221915400	221916250		rs4846352	-3.582	rs10863651	0.39	2.778	-2.58824	29	1	top1	0.3901	0.0025	-2.58824	0.00965
analysis/predict/WEIGHTS//chr1:222019150-222019900.wgt.RDat	chr1:222019150-222019900	1	222019150	222019900		rs6668395	-1.905	rs4528124	0.522	-4.734	0.53846	34	3	lasso.plasma	0.094	0.00021	-0.88688	0.375
analysis/predict/WEIGHTS//chr1:222179800-222180500.wgt.RDat	chr1:222179800-222180500	1	222179800	222180500		rs12139468	3.631	rs12125383	0.0437	-2.796	1.67619	22	1	top1.qtl	0.043	0.0097	-0.91398	0.361
analysis/predict/WEIGHTS//chr1:222183450-222184150.wgt.RDat	chr1:222183450-222184150	1	222183450	222184150		rs12139468	3.631	rs1815631	0.0472	3.711	-2.29412	24	4	lasso.plasma	0.081	0.00054	-3.73708	0.000186
analysis/predict/WEIGHTS//chr1:222637650-222638350.wgt.RDat	chr1:222637650-222638350	1	222637650	222638350		rs4573528	-1.046	rs11118966	0.174	-4.38	-0.06977	6	2	lasso	0.276	7.4e-05	-0.8076	0.419
analysis/predict/WEIGHTS//chr1:22270700-22271350.wgt.RDat	chr1:22270700-22271350	1	22270700	22271350		rs10917070	2.492	rs12567548	0.369	-2.846	-0.1	24	1	top1	0.3686	0.00058	0.1	0.92
analysis/predict/WEIGHTS//chr1:22283100-22284250.wgt.RDat	chr1:22283100-22284250	1	22283100	22284250		rs10917070	2.492	rs12740670	0.0496	3.064	-1.03415	23	1	top1.as	0.0469	0.0073	-1.03415	0.301
analysis/predict/WEIGHTS//chr1:223070950-223071900.wgt.RDat	chr1:223070950-223071900	1	223070950	223071900		rs35947998	2.375	rs17162913	0.372	-2.681	-0.78	13	1	top1.qtl	0.052	0.0051	-1.41667	0.157
analysis/predict/WEIGHTS//chr1:223119550-223120450.wgt.RDat	chr1:223119550-223120450	1	223119550	223120450		rs2254329	2.473	rs17163580	0.137	-3.288	-1.72222	27	1	top1	0.14	0.015	1.72222	0.085
analysis/predict/WEIGHTS//chr1:223121500-223122100.wgt.RDat	chr1:223121500-223122100	1	223121500	223122100		rs2254329	2.473	rs10495205	-0.00874	1.5	-0.81818	24	1	top1.as	0.5785	0.0008	-0.09804	0.922
analysis/predict/WEIGHTS//chr1:223180550-223181100.wgt.RDat	chr1:223180550-223181100	1	223180550	223181100		rs34558820	-2.637	rs2789912	0.0202	-2.953	-2.16327	13	1	top1.as	0.038	0.015	2.16327	0.0305
analysis/predict/WEIGHTS//chr1:223810700-223811250.wgt.RDat	chr1:223810700-223811250	1	223810700	223811250		rs10916633	-2.317	rs12127418	-0.0052	1.451	0.76238	10	1	top1.qtl	0.248	0.00085	0.7561	0.45
analysis/predict/WEIGHTS//chr1:224033750-224034150.wgt.RDat	chr1:224033750-224034150	1	224033750	224034150		rs6604731	2	rs1538140	-0.0112	0.732	0.28947	16	1	top1	0.052	0.005	0.28947	0.772
analysis/predict/WEIGHTS//chr1:224074150-224074750.wgt.RDat	chr1:224074150-224074750	1	224074150	224074750		rs12035633	2.063	rs10915917	0.526	-6.982	1.40816	7	3	lasso.plasma	0.29	1.1e-11	-1.51909	0.129
analysis/predict/WEIGHTS//chr1:224326800-224327400.wgt.RDat	chr1:224326800-224327400	1	224326800	224327400		rs869945	1.744	rs7526252	0.282	3.525	1.57317	16	1	top1	0.2824	0.0026	1.57317	0.116
analysis/predict/WEIGHTS//chr1:22531500-22532150.wgt.RDat	chr1:22531500-22532150	1	22531500	22532150		rs2807377	-2.072	rs2807378	-0.055	2.31	-1.17763	54	1	top1.qtl	0.04	0.013	-0.7732	0.439
analysis/predict/WEIGHTS//chr1:22586300-22586800.wgt.RDat	chr1:22586300-22586800	1	22586300	22586800		rs2473242	-1.524	rs962770	-0.018578	1.947	0.11236	28	2	lasso.as	0.6698	0.00085	0.22028	0.826
analysis/predict/WEIGHTS//chr1:225881750-225882400.wgt.RDat	chr1:225881750-225882400	1	225881750	225882400		rs9943197	1.573	rs1876084	0.251	-5.232	0.38202	26	10	lasso.plasma	0.12	3.7e-05	-0.43617	0.663
analysis/predict/WEIGHTS//chr1:225959950-225961150.wgt.RDat	chr1:225959950-225961150	1	225959950	225961150		rs1557092	1.09	rs12403575	0.116	-3.373	0.03529	27	1	lasso	0.224	0.0009	-0.03529	0.972
analysis/predict/WEIGHTS//chr1:22668500-22669000.wgt.RDat	chr1:22668500-22669000	1	22668500	22669000		rs4655044	2.489	rs11580249	-0.056881	-2.998	1.42623	34	1	lasso.as	0.058	0.0033	-1.42623	0.154
analysis/predict/WEIGHTS//chr1:226820100-226820750.wgt.RDat	chr1:226820100-226820750	1	226820100	226820750		rs6696348	-1.648	rs10916019	0.118001	1.949	0.69231	32	7	lasso.as	0.5507	1.1e-05	0.03208	0.974
analysis/predict/WEIGHTS//chr1:227083150-227083950.wgt.RDat	chr1:227083150-227083950	1	227083150	227083950		rs2246221	-3.099	rs6759	0.562554	-6.22	-2.875	29	6	lasso.as	0.22	7.6e-09	2.88967	0.00386
analysis/predict/WEIGHTS//chr1:227127450-227128050.wgt.RDat	chr1:227127450-227128050	1	227127450	227128050		rs1892490	-2.484	rs12145777	-0.01	2.428	-1.74468	17	1	top1	0.043	0.0099	-1.74468	0.081
analysis/predict/WEIGHTS//chr1:227189550-227190000.wgt.RDat	chr1:227189550-227190000	1	227189550	227190000		rs7535826	2.725	rs8159	0.172	2.31	-1.1	47	1	top1.qtl	0.089	0.00029	-1.25773	0.208
analysis/predict/WEIGHTS//chr1:22740550-22741250.wgt.RDat	chr1:22740550-22741250	1	22740550	22741250		rs11591062	2.259	rs7536791	-0.0685	-3.13	1.43363	22	5	lasso	0.047	0.007	-0.14988	0.881
analysis/predict/WEIGHTS//chr1:227493750-227494200.wgt.RDat	chr1:227493750-227494200	1	227493750	227494200		rs7512409	2.439	rs7512409	0.176	-3.566	2.43902	25	1	lasso	0.42	0.0011	-2.43902	0.0147
analysis/predict/WEIGHTS//chr1:227531750-227532550.wgt.RDat	chr1:227531750-227532550	1	227531750	227532550		rs10916122	-1.711	rs4653828	0.028839	-3.356	0.87912	24	6	lasso.as	0.0936	0.01	-1.24684	0.212
analysis/predict/WEIGHTS//chr1:227587000-227587700.wgt.RDat	chr1:227587000-227587700	1	227587000	227587700		rs12047468	2.152	rs3000811	0.269	4.507	-0.94495	37	1	top1	0.269	0.00042	-0.94495	0.345
analysis/predict/WEIGHTS//chr1:22778100-22778700.wgt.RDat	chr1:22778100-22778700	1	22778100	22778700		rs2078450	-3.084	rs10493015	0.42	-1.674	1.6747	17	1	top1	0.42009	0.0011	-1.6747	0.094
analysis/predict/WEIGHTS//chr1:229194450-229195000.wgt.RDat	chr1:229194450-229195000	1	229194450	229195000		rs610558	1	rs546206	0.166	2.638	0.57025	32	1	top1.qtl	0.051	0.0053	0.50746	0.612
analysis/predict/WEIGHTS//chr1:229205850-229206350.wgt.RDat	chr1:229205850-229206350	1	229205850	229206350		rs617982	-2.327	rs6426532	-0.0101	-3.223	0.35632	31	1	top1.qtl	0.086	0.00038	-0.35632	0.722
analysis/predict/WEIGHTS//chr1:229220900-229221600.wgt.RDat	chr1:229220900-229221600	1	229220900	229221600		rs617982	-2.327	rs508342	0.079221	2.367	-0.59155	27	6	lasso.as	0.5151	0.0048	-1.26144	0.207
analysis/predict/WEIGHTS//chr1:2292450-2292900.wgt.RDat	chr1:2292450-2292900	1	2292450	2292900		rs2840531	-1.741	rs6665546	-0.0305	1.447	-0.8843	31	1	top1.qtl	0.07	0.0013	0.50516	0.613
analysis/predict/WEIGHTS//chr1:229253300-229254100.wgt.RDat	chr1:229253300-229254100	1	229253300	229254100		rs9660060	-2.436	rs17140173	0.0209	4.136	0.6383	32	1	top1.qtl	0.117	3.7e-05	0.8587	0.391
analysis/predict/WEIGHTS//chr1:229307500-229308250.wgt.RDat	chr1:229307500-229308250	1	229307500	229308250		rs12026629	-2.674	rs6587336	-0.0279	2.16	0.75	25	1	top1.qtl	0.045	0.0083	0.75	0.453
analysis/predict/WEIGHTS//chr1:229455700-229456150.wgt.RDat	chr1:229455700-229456150	1	229455700	229456150		rs12132466	1.431	rs237826	-0.0375	1.91	0.22	35	1	top1.qtl	0.041	0.012	0.72839	0.466
analysis/predict/WEIGHTS//chr1:230237150-230237700.wgt.RDat	chr1:230237150-230237700	1	230237150	230237700		rs11583591	2.07	rs11122300	0.000119	-2.014	-0.27869	26	1	top1.qtl	0.082	0.00053	1.71717	0.0859
analysis/predict/WEIGHTS//chr1:230321400-230322350.wgt.RDat	chr1:230321400-230322350	1	230321400	230322350		rs11122458	1.377	rs11122459	-0.0312	-2.341	0.81818	25	23	lasso.plasma	0.0625	0.0022	-0.30216	0.763
analysis/predict/WEIGHTS//chr1:23043950-23044400.wgt.RDat	chr1:23043950-23044400	1	23043950	23044400		rs294218	-2.129	rs882025	0.231	4.023	-1.20238	28	1	top1.as	0.281	0.0045	-1.20238	0.229
analysis/predict/WEIGHTS//chr1:230816200-230816850.wgt.RDat	chr1:230816200-230816850	1	230816200	230816850		rs12059975	-2.481	rs1051038	0.205	4.232	1.94898	46	1	top1	0.205	0.00024	1.94898	0.0513
analysis/predict/WEIGHTS//chr1:230960950-230961450.wgt.RDat	chr1:230960950-230961450	1	230960950	230961450		rs12738173	-1.939	rs6667483	0.0153	3.553	-1.11236	30	1	top1.as	0.365	0.0022	-1.11236	0.266
analysis/predict/WEIGHTS//chr1:231539950-231540400.wgt.RDat	chr1:231539950-231540400	1	231539950	231540400		rs508618	2.236	rs2749710	0.307	-6.019	0.15116	25	1	top1.qtl	0.25	8.1e-10	-0.15116	0.88
analysis/predict/WEIGHTS//chr1:231553500-231553950.wgt.RDat	chr1:231553500-231553950	1	231553500	231553950		rs508618	2.236	rs2790879	-0.0458	-0.433	0.29885	22	1	top1.qtl	0.384	0.014	-0.39286	0.694
analysis/predict/WEIGHTS//chr1:231584700-231585300.wgt.RDat	chr1:231584700-231585300	1	231584700	231585300		rs1769791	-1.337	rs1339890	0.398	-0.864	0.20652	16	1	top1	0.3983	0.0038	-0.20652	0.836
analysis/predict/WEIGHTS//chr1:231737550-231738500.wgt.RDat	chr1:231737550-231738500	1	231737550	231738500		rs1655296	2.229	rs6656080	0.0943	4.781	1.41667	13	1	top1.as	0.13	1.3e-05	1.41667	0.157
analysis/predict/WEIGHTS//chr1:231863700-231864250.wgt.RDat	chr1:231863700-231864250	1	231863700	231864250		rs2812385	0.547	rs2812385	0.271	4.966	0.54651	20	1	top1	0.13	1.4e-05	0.54651	0.585
analysis/predict/WEIGHTS//chr1:231864950-231865600.wgt.RDat	chr1:231864950-231865600	1	231864950	231865600		rs2812385	0.547	rs11122325	0.408	-5.609	-0.20792	20	17	lasso.plasma	0.19	1.4e-07	0.02496	0.98
analysis/predict/WEIGHTS//chr1:231983650-231984250.wgt.RDat	chr1:231983650-231984250	1	231983650	231984250		rs3082	-1.678	rs12757857	0.127	1.951	1.16867	36	1	lasso.plasma	0.2507	0.0088	1.16867	0.243
analysis/predict/WEIGHTS//chr1:232442100-232442550.wgt.RDat	chr1:232442100-232442550	1	232442100	232442550		rs4408102	-1.851	rs1890316	-0.0416	2.808	1.10345	40	1	top1.qtl	0.039	0.013	0.55445	0.579
analysis/predict/WEIGHTS//chr1:232457950-232458800.wgt.RDat	chr1:232457950-232458800	1	232457950	232458800		rs662251	-1.733	rs12033296	0.0194	-3.874	-0.05303	39	1	top1.qtl	0.046	0.0077	0.17969	0.857
analysis/predict/WEIGHTS//chr1:232915950-232916650.wgt.RDat	chr1:232915950-232916650	1	232915950	232916650		rs2795396	2.212	rs16858199	-0.022715	-1.511	0	22	2	lasso.as	0.067	0.0016	-0.12849	0.898
analysis/predict/WEIGHTS//chr1:233737850-233738400.wgt.RDat	chr1:233737850-233738400	1	233737850	233738400		rs6678678	1.373	rs1693230	-0.00867	-2.793	0.51648	39	1	top1.as	0.03809	0.014	0.77419	0.439
analysis/predict/WEIGHTS//chr1:233840500-233841250.wgt.RDat	chr1:233840500-233841250	1	233840500	233841250		rs12144732	2.074	rs12757689	0.0209	2.146	0.72807	14	1	top1.qtl	0.04	0.012	0.72807	0.467
analysis/predict/WEIGHTS//chr1:233871650-233872050.wgt.RDat	chr1:233871650-233872050	1	233871650	233872050		rs12144732	2.074	rs11581961	0.273	-1.322	0.32954	28	1	lasso.plasma	0.5169	0.0031	0.63025	0.529
analysis/predict/WEIGHTS//chr1:233936700-233937200.wgt.RDat	chr1:233936700-233937200	1	233936700	233937200		rs7530423	2.064	rs1039012	0.00632	-3.872	-0.7125	29	1	top1.as	0.0813	0.00054	0.41667	0.677
analysis/predict/WEIGHTS//chr1:234243150-234243950.wgt.RDat	chr1:234243150-234243950	1	234243150	234243950		rs12140042	1.978	rs12751747	-0.0312	3.821	-0.64286	31	1	top1.qtl	0.104	9.8e-05	-0.85393	0.393
analysis/predict/WEIGHTS//chr1:234539100-234539600.wgt.RDat	chr1:234539100-234539600	1	234539100	234539600		rs16843133	-1.356	rs443685	0.425	-2.439	1.05556	30	1	top1.as	0.4457	0.01	-1.05556	0.291
analysis/predict/WEIGHTS//chr1:234594000-234594700.wgt.RDat	chr1:234594000-234594700	1	234594000	234594700		rs1619856	-1.659	rs1619856	-0.0216	2.493	-1.65882	37	1	top1.qtl	0.048	0.0065	-0.85156	0.394
analysis/predict/WEIGHTS//chr1:234623100-234623550.wgt.RDat	chr1:234623100-234623550	1	234623100	234623550		rs271748	2.079	rs271744	-0.0307	1.334	-1.26506	34	1	top1.as	0.3507	0.0093	-0.38843	0.698
analysis/predict/WEIGHTS//chr1:234745950-234746350.wgt.RDat	chr1:234745950-234746350	1	234745950	234746350		rs1329125	1.889	rs17520203	-0.0225	-1.577	-0.32743	27	1	top1.qtl	0.078	0.00072	0.90196	0.367
analysis/predict/WEIGHTS//chr1:234778900-234779400.wgt.RDat	chr1:234778900-234779400	1	234778900	234779400		rs673283	2.372	rs610329	0.0998	-3.817	0.39506	37	11	lasso	0.078	0.00068	0.41117	0.681
analysis/predict/WEIGHTS//chr1:234853400-234853950.wgt.RDat	chr1:234853400-234853950	1	234853400	234853950		rs487738	-2.857	rs506367	0.0936	-2.488	2.25	36	1	top1.qtl	0.042	0.011	0.43396	0.664
analysis/predict/WEIGHTS//chr1:234859150-234860800.wgt.RDat	chr1:234859150-234860800	1	234859150	234860800		rs487738	-2.857	rs3888368	-0.0308	2.296	-1.48624	34	1	top1.qtl	0.071	0.0012	-1.48624	0.137
analysis/predict/WEIGHTS//chr1:235051600-235052200.wgt.RDat	chr1:235051600-235052200	1	235051600	235052200		rs12562007	-2.405	rs16844196	0.030574	-2.799	-2.37383	39	20	lasso.as	0.191	0.0032	0.96001	0.337
analysis/predict/WEIGHTS//chr1:235053700-235054450.wgt.RDat	chr1:235053700-235054450	1	235053700	235054450		rs12562007	-2.405	rs908319	0.0862	-2.772	0.46512	38	1	top1.as	0.2431	0.00072	-0.46512	0.642
analysis/predict/WEIGHTS//chr1:235096150-235096950.wgt.RDat	chr1:235096150-235096950	1	235096150	235096950		rs2802928	0.945	rs6586361	0.257	3.067	0.29885	30	1	top1.as	0.2906	0.00023	0.29885	0.765
analysis/predict/WEIGHTS//chr1:235097350-235098300.wgt.RDat	chr1:235097350-235098300	1	235097350	235098300		rs2802928	0.945	rs10910534	-0.0559	1.662	0.54945	29	1	top1.qtl	0.08	0.0006	0.54622	0.585
analysis/predict/WEIGHTS//chr1:235292100-235292500.wgt.RDat	chr1:235292100-235292500	1	235292100	235292500		rs4551650	-0.677	rs7513381	0.17	1.853	-0.16807	12	1	top1.qtl	0.2522	0.0045	0.03191	0.975
analysis/predict/WEIGHTS//chr1:235459100-235459900.wgt.RDat	chr1:235459100-235459900	1	235459100	235459900		rs10802583	-0.659	rs16832537	-0.0106	-1.355	0.05385	7	1	top1.as	0.067	0.0016	0.47619	0.634
analysis/predict/WEIGHTS//chr1:235491550-235492150.wgt.RDat	chr1:235491550-235492150	1	235491550	235492150		rs2803851	1.176	rs2803851	-0.0209	-1.898	1.17647	10	1	top1.qtl	0.037	0.015	-1.17647	0.239
analysis/predict/WEIGHTS//chr1:235572050-235573100.wgt.RDat	chr1:235572050-235573100	1	235572050	235573100		rs11588513	-2.012	rs12405889	-0.031101	1.655	-1.96386	10	4	lasso.as	0.045	0.0084	-0.99864	0.318
analysis/predict/WEIGHTS//chr1:235799200-235799650.wgt.RDat	chr1:235799200-235799650	1	235799200	235799650		rs17548391	1.121	rs6429207	-0.0815	-2.458	-0.94118	11	1	top1.qtl	0.04	0.012	0.94118	0.347
analysis/predict/WEIGHTS//chr1:235877350-235878100.wgt.RDat	chr1:235877350-235878100	1	235877350	235878100		rs7541057	0.198	rs3768051	-0.028228	-2.183	0.10204	9	8	lasso.as	0.2	0.01	-0.04697	0.963
analysis/predict/WEIGHTS//chr1:236173100-236173700.wgt.RDat	chr1:236173100-236173700	1	236173100	236173700		rs16833075	-1.376	rs4659618	0.0818	1.62	0.69811	33	1	top1.as	0.32	0.0055	1.21552	0.224
analysis/predict/WEIGHTS//chr1:236275800-236276200.wgt.RDat	chr1:236275800-236276200	1	236275800	236276200		rs1468057	1.636	rs2064917	-0.0482	3.001	0.12903	35	1	top1.qtl	0.069	0.0014	0.12903	0.897
analysis/predict/WEIGHTS//chr1:236482750-236483250.wgt.RDat	chr1:236482750-236483250	1	236482750	236483250		rs17567019	2.14	rs16833586	0.0173	2.95	-0.2931	21	1	top1	0.041	0.011	-0.2931	0.769
analysis/predict/WEIGHTS//chr1:236483750-236484900.wgt.RDat	chr1:236483750-236484900	1	236483750	236484900		rs17567019	2.14	rs12040004	0.175	2.589	-1.7619	22	1	lasso	0.3538	0.012	-1.85714	0.0633
analysis/predict/WEIGHTS//chr1:236562750-236563250.wgt.RDat	chr1:236562750-236563250	1	236562750	236563250		rs669710	-2.663	rs630891	-0.0707	1.377	-1.22472	21	1	top1.qtl	0.041	0.011	-1.4433	0.149
analysis/predict/WEIGHTS//chr1:2369450-2369850.wgt.RDat	chr1:2369450-2369850	1	2369450	2369850		rs2494591	2.2	rs12023660	-0.00417	1.912	0.63924	20	1	top1.as	0.0511	0.0053	1.89091	0.0586
analysis/predict/WEIGHTS//chr1:239198400-239199000.wgt.RDat	chr1:239198400-239199000	1	239198400	239199000		rs1509701	1.108	rs10802742	0.145	1.213	-0.31915	21	1	top1.as	0.0414	0.011	0.87069	0.384
analysis/predict/WEIGHTS//chr1:239220150-239220850.wgt.RDat	chr1:239220150-239220850	1	239220150	239220850		rs1509701	1.108	rs4366306	0.253957	-5.376	-0.61177	18	6	lasso.as	0.16	1.7e-06	-0.18536	0.853
analysis/predict/WEIGHTS//chr1:240574650-240575350.wgt.RDat	chr1:240574650-240575350	1	240574650	240575350		rs1414659	1.914	rs9283429	0.223	1.292	0.27976	27	1	top1	0.223	0.014	0.27976	0.78
analysis/predict/WEIGHTS//chr1:242226600-242227200.wgt.RDat	chr1:242226600-242227200	1	242226600	242227200		rs10926618	-1.518	rs10926614	-0.0118	3.929	0.2439	13	1	top1.qtl	0.137	7.4e-06	0.2439	0.807
analysis/predict/WEIGHTS//chr1:2425700-2426150.wgt.RDat	chr1:2425700-2426150	1	2425700	2426150		rs3762444	-2.5	rs4648639	-0.0418	2.263	-1.17442	22	1	top1.qtl	0.052	0.005	-1.17442	0.24
analysis/predict/WEIGHTS//chr1:242625100-242625700.wgt.RDat	chr1:242625100-242625700	1	242625100	242625700		rs2654867	1.676	rs6702736	0.616	5.775	-0.17045	31	1	top1.as	0.19	1.3e-07	-0.17045	0.865
analysis/predict/WEIGHTS//chr1:243669050-243669700.wgt.RDat	chr1:243669050-243669700	1	243669050	243669700		rs2994329	2.614	rs1058305	0.54	8.055	1.06667	25	7	lasso.plasma	0.48	1e-20	0.85524	0.392
analysis/predict/WEIGHTS//chr1:244532800-244533350.wgt.RDat	chr1:244532800-244533350	1	244532800	244533350		rs10927219	-1.337	rs3123705	0.0477	4.125	-0.44	38	18	lasso.plasma	0.056	0.0038	-0.23136	0.817
analysis/predict/WEIGHTS//chr1:244578250-244578900.wgt.RDat	chr1:244578250-244578900	1	244578250	244578900		rs3101468	1.057	rs7521072	0.076983	-4.741	-0.18293	22	2	lasso.as	0.098	0.00015	0.45382	0.65
analysis/predict/WEIGHTS//chr1:244990000-244990450.wgt.RDat	chr1:244990000-244990450	1	244990000	244990450		rs1495946	-1.486	rs9727443	0.0248	-2.875	-0.55645	16	4	lasso.plasma	0.045	0.0081	1.12223	0.262
analysis/predict/WEIGHTS//chr1:24532900-24533550.wgt.RDat	chr1:24532900-24533550	1	24532900	24533550		rs10903056	2.548	rs6696471	0.446	4.695	2.46914	27	1	top1	0.446	3.6e-08	2.46914	0.0135
analysis/predict/WEIGHTS//chr1:245745250-245745800.wgt.RDat	chr1:245745250-245745800	1	245745250	245745800		rs1715794	1.907	rs1715774	0.0328	4.048	-1.7378	33	1	top1.qtl	0.075	0.00086	-1.7378	0.0822
analysis/predict/WEIGHTS//chr1:245854250-245854850.wgt.RDat	chr1:245854250-245854850	1	245854250	245854850		rs3766648	-1.511	rs6700721	0.0276	4.369	-1.41758	21	3	lasso.plasma	0.0909	0.00026	-1.44958	0.147
analysis/predict/WEIGHTS//chr1:246584050-246584800.wgt.RDat	chr1:246584050-246584800	1	246584050	246584800		rs10754517	-2.309	rs10754517	-0.0106	-1.911	-2.30909	14	1	top1.qtl	0.078	0.00067	0.25743	0.797
analysis/predict/WEIGHTS//chr1:246666500-246667200.wgt.RDat	chr1:246666500-246667200	1	246666500	246667200		rs10924756	-1.462	rs10924756	0.118	6.464	-1.46237	21	1	top1	0.29	1.5e-11	-1.46237	0.144
analysis/predict/WEIGHTS//chr1:246873100-246873550.wgt.RDat	chr1:246873100-246873550	1	246873100	246873550		rs6426317	2.084	rs10802432	0.128	3.053	-1.2069	19	1	top1.as	0.0595	0.0028	0.42857	0.668
analysis/predict/WEIGHTS//chr1:24715850-24716750.wgt.RDat	chr1:24715850-24716750	1	24715850	24716750		rs11589294	4.329	rs507908	0.004895	-2.667	-4.23171	32	9	lasso.as	0.0827	0.013	0.02375	0.981
analysis/predict/WEIGHTS//chr1:247660100-247660700.wgt.RDat	chr1:247660100-247660700	1	247660100	247660700		rs10802514	0.909	rs4925674	-0.076	1.22	0.49039	13	1	top1	0.043	0.01	0.49038	0.624
analysis/predict/WEIGHTS//chr1:247679050-247680300.wgt.RDat	chr1:247679050-247680300	1	247679050	247680300		rs6426255	-1.337	rs10802521	-0.0879	0.981	0.05769	14	1	top1.qtl	0.0665	0.0017	-0.41935	0.675
analysis/predict/WEIGHTS//chr1:247795950-247796500.wgt.RDat	chr1:247795950-247796500	1	247795950	247796500		rs2293590	-2.107	rs28481280	0.427	-6.939	0.71111	13	1	top1	0.33	5.4e-13	-0.71111	0.477
analysis/predict/WEIGHTS//chr1:247840700-247841350.wgt.RDat	chr1:247840700-247841350	1	247840700	247841350		rs28620741	-1.835	rs28446289	-0.0156	-3.238	-0.6	23	1	top1	0.077	0.00073	0.6	0.549
analysis/predict/WEIGHTS//chr1:248450150-248450650.wgt.RDat	chr1:248450150-248450650	1	248450150	248450650		rs10788764	0.741	rs4430369	0.258	2.728	0.43478	23	1	top1	0.258	0.011	0.43478	0.664
analysis/predict/WEIGHTS//chr1:25358500-25359450.wgt.RDat	chr1:25358500-25359450	1	25358500	25359450		rs311425	2.443	rs4649057	-0.0202	-2.809	-0.37805	39	1	top1	0.057	0.0034	0.37805	0.705
analysis/predict/WEIGHTS//chr1:26105800-26106300.wgt.RDat	chr1:26105800-26106300	1	26105800	26106300		rs807269	-2.086	rs807250	0.144	-1.727	-0.10405	30	1	top1.as	0.3879	0.014	-1.05442	0.292
analysis/predict/WEIGHTS//chr1:26122900-26123600.wgt.RDat	chr1:26122900-26123600	1	26122900	26123600		rs6675287	2.196	rs807250	0.0165	1.5	-0.10405	29	1	top1.as	0.4029	0.00087	-0.10405	0.917
analysis/predict/WEIGHTS//chr1:27029500-27029800.wgt.RDat	chr1:27029500-27029800	1	27029500	27029800		rs12738345	-1.15	rs11247593	-0.025305	2.058	0.65306	13	4	lasso.as	0.0371	0.015	-0.15463	0.877
analysis/predict/WEIGHTS//chr1:27470850-27471350.wgt.RDat	chr1:27470850-27471350	1	27470850	27471350		rs12751422	3.098	rs34306208	0.262	-0.696	-3.05882	11	1	top1.qtl	0.063	0.0021	3.05882	0.00222
analysis/predict/WEIGHTS//chr1:30179000-30179700.wgt.RDat	chr1:30179000-30179700	1	30179000	30179700		rs271392	2.453	rs12408008	0.106	-3.501	0.01064	31	1	top1.qtl	0.2926	0.0017	-0.01064	0.992
analysis/predict/WEIGHTS//chr1:31148400-31149200.wgt.RDat	chr1:31148400-31149200	1	31148400	31149200		rs1188445	1.583	rs1188390	0.308	-4.598	-0.91011	24	1	top1	0.308	0.00038	0.91011	0.363
analysis/predict/WEIGHTS//chr1:32135300-32135800.wgt.RDat	chr1:32135300-32135800	1	32135300	32135800		rs4949459	1.952	rs2297675	-0.024754	-2.694	-1	30	4	lasso.as	0.044	0.0092	1.34876	0.177
analysis/predict/WEIGHTS//chr1:3250300-3251050.wgt.RDat	chr1:3250300-3251050	1	3250300	3251050		rs4648380	2.156	rs2483287	0.016176	-2.772	-0.67442	38	13	lasso.as	0.328	0.0049	0.9494	0.342
analysis/predict/WEIGHTS//chr1:3251850-3252300.wgt.RDat	chr1:3251850-3252300	1	3251850	3252300		rs4648380	2.156	rs2483280	-0.0322	-2.724	-1.58025	38	11	lasso	0.038	0.014	1.24244	0.214
analysis/predict/WEIGHTS//chr1:32755750-32756400.wgt.RDat	chr1:32755750-32756400	1	32755750	32756400		rs1741981	0.544	rs695161	0.0175	-0.717	0	2	1	top1.qtl	0.0618	0.0024	0	1
analysis/predict/WEIGHTS//chr1:33615250-33615950.wgt.RDat	chr1:33615250-33615950	1	33615250	33615950		rs2936005	-1.254	rs664182	-0.0486	-2.217	-0.03226	16	1	top1.as	0.363	0.0037	0.6875	0.492
analysis/predict/WEIGHTS//chr1:33842350-33843100.wgt.RDat	chr1:33842350-33843100	1	33842350	33843100		rs6685849	2.911	rs12127097	0.279	7.067	-0.72	21	5	lasso.plasma	0.4	1.6e-16	-0.21492	0.83
analysis/predict/WEIGHTS//chr1:33936200-33936950.wgt.RDat	chr1:33936200-33936950	1	33936200	33936950		rs12565140	-1.294	rs4652898	-0.012	3.368	-1.0566	24	16	lasso.plasma	0.086	0.00038	-0.10661	0.915
analysis/predict/WEIGHTS//chr1:33947750-33948700.wgt.RDat	chr1:33947750-33948700	1	33947750	33948700		rs12565140	-1.294	rs9662260	-0.0276	-2.072	1.16495	23	1	top1.as	0.1348	0.015	-1.29358	0.196
analysis/predict/WEIGHTS//chr1:34029200-34029800.wgt.RDat	chr1:34029200-34029800	1	34029200	34029800		rs17476969	-3.61	rs1318411	0.239	6.39	1.81609	47	1	top1	0.18	1.8e-07	1.81609	0.0694
analysis/predict/WEIGHTS//chr1:34224100-34224950.wgt.RDat	chr1:34224100-34224950	1	34224100	34224950		rs478205	1.47	rs507641	0.558	-2.462	0.91304	36	8	lasso	0.6478	0.0012	1.31819	0.187
analysis/predict/WEIGHTS//chr1:3445800-3446500.wgt.RDat	chr1:3445800-3446500	1	3445800	3446500		rs2820996	2.747	rs6685801	-0.0137	-2.378	0.84357	16	1	top1.qtl	0.0878	0.011	-0.84358	0.399
analysis/predict/WEIGHTS//chr1:35315850-35316500.wgt.RDat	chr1:35315850-35316500	1	35315850	35316500		rs4653112	-2.553	rs6703979	0.269	4.719	0.96808	23	1	top1	0.269	0.00021	0.96809	0.333
analysis/predict/WEIGHTS//chr1:36653700-36654100.wgt.RDat	chr1:36653700-36654100	1	36653700	36654100		rs795047	-1.148	rs795045	-0.0256	0.901	-0.5	6	3	lasso	0.1976	0.015	0.51769	0.605
analysis/predict/WEIGHTS//chr1:37999850-38000550.wgt.RDat	chr1:37999850-38000550	1	37999850	38000550		rs11264072	3.713	rs11264063	-0.0153	0.989	2.86747	17	1	top1	0.039	0.013	2.86747	0.00414
analysis/predict/WEIGHTS//chr1:39636650-39637150.wgt.RDat	chr1:39636650-39637150	1	39636650	39637150		rs7538300	2.528	rs7538300	0.175	3.098	2.52809	14	1	top1.qtl	0.3622	0.0081	2.52809	0.0115
analysis/predict/WEIGHTS//chr1:39832100-39832550.wgt.RDat	chr1:39832100-39832550	1	39832100	39832550		rs1180383	2.551	rs630519	0.198	-0.824	0.30918	12	1	top1	0.11	8.7e-05	-0.30918	0.757
analysis/predict/WEIGHTS//chr1:40300550-40301200.wgt.RDat	chr1:40300550-40301200	1	40300550	40301200		rs10889022	-1.679	rs2294814	0.616	-9.748	0.30488	23	1	top1.as	0.58	1.2e-26	-0.30488	0.76
analysis/predict/WEIGHTS//chr1:40733350-40734000.wgt.RDat	chr1:40733350-40734000	1	40733350	40734000		rs7516571	1.781	rs7514099	0.378	-4.789	1.70833	22	10	lasso.plasma	0.18	3.4e-07	-1.05403	0.292
analysis/predict/WEIGHTS//chr1:40857350-40857800.wgt.RDat	chr1:40857350-40857800	1	40857350	40857800		rs2982510	-1.959	rs209580	0.271	-3.473	1.72941	23	1	top1.qtl	0.279	0.014	-1.72941	0.0837
analysis/predict/WEIGHTS//chr1:41328200-41328900.wgt.RDat	chr1:41328200-41328900	1	41328200	41328900		rs4660472	-1.792	rs11209075	0.144	-3.861	-0.11504	24	1	top1.as	0.214	0.0016	0.11504	0.908
analysis/predict/WEIGHTS//chr1:41469250-41469750.wgt.RDat	chr1:41469250-41469750	1	41469250	41469750		rs12144160	1.625	rs6685430	-0.00885	-1.66	0.84615	25	1	top1.qtl	0.091	0.00027	0.875	0.382
analysis/predict/WEIGHTS//chr1:41939950-41940550.wgt.RDat	chr1:41939950-41940550	1	41939950	41940550		rs9645433	-1.497	rs4660541	-0.011	2.122	1.13187	24	1	top1.qtl	0.053	0.0045	1.13187	0.258
analysis/predict/WEIGHTS//chr1:41966000-41966650.wgt.RDat	chr1:41966000-41966650	1	41966000	41966650		rs600401	1.694	rs12043801	0.223	4.801	-0.53774	28	1	top1.as	0.091	0.00026	-0.53774	0.591
analysis/predict/WEIGHTS//chr1:42326000-42326900.wgt.RDat	chr1:42326000-42326900	1	42326000	42326900		rs6681556	-2.831	rs685989	0.0175	1.455	-0.53571	30	1	top1.qtl	0.0387	0.014	0.36697	0.714
analysis/predict/WEIGHTS//chr1:42778200-42778750.wgt.RDat	chr1:42778200-42778750	1	42778200	42778750		rs2494366	-0.589	rs7539485	0.227	1.529	-0.31183	7	1	top1.as	0.41	0.0059	-0.37037	0.711
analysis/predict/WEIGHTS//chr1:43504900-43505650.wgt.RDat	chr1:43504900-43505650	1	43504900	43505650		rs666111	-1.409	rs666111	0.0182	-1.79	-1.40909	16	1	top1.qtl	0.1872	0.0028	0.18321	0.855
analysis/predict/WEIGHTS//chr1:43700650-43701900.wgt.RDat	chr1:43700650-43701900	1	43700650	43701900		rs12135483	-1.63	rs644651	0.166	-1.137	-1.25806	28	1	top1.as	0.1801	0.00073	0.85714	0.391
analysis/predict/WEIGHTS//chr1:43861600-43862500.wgt.RDat	chr1:43861600-43862500	1	43861600	43862500		rs11541153	-1.632	rs839758	-0.036	-2.8	-0.41667	17	2	lasso	0.048	0.0068	0.64116	0.521
analysis/predict/WEIGHTS//chr1:44174000-44174550.wgt.RDat	chr1:44174000-44174550	1	44174000	44174550		rs304303	-3.678	rs3791039	-0.0583	0.966	1.325	8	1	top1.qtl	0.052	0.0051	2.01163	0.0443
analysis/predict/WEIGHTS//chr1:44457100-44457550.wgt.RDat	chr1:44457100-44457550	1	44457100	44457550		rs1362153	-2.493	rs2486001	0.0554	-2.885	-0.65	24	1	lasso	0.057	0.0034	0.65	0.516
analysis/predict/WEIGHTS//chr1:45049850-45050350.wgt.RDat	chr1:45049850-45050350	1	45049850	45050350		rs755597	-1.5	rs755597	-0.0236	-2.12	-1.5	27	1	top1.as	0.043	0.0098	1.5	0.134
analysis/predict/WEIGHTS//chr1:45196500-45197150.wgt.RDat	chr1:45196500-45197150	1	45196500	45197150		rs11211030	1.22	rs11211024	0.0638	1.983	0.87387	12	1	top1.as	0.1332	0.012	0.87387	0.382
analysis/predict/WEIGHTS//chr1:45477600-45477950.wgt.RDat	chr1:45477600-45477950	1	45477600	45477950		rs264011	0.802	rs12141099	-0.0823	-1.143	-0.24691	17	1	top1.qtl	0.04	0.012	-0.37363	0.709
analysis/predict/WEIGHTS//chr1:45848800-45849450.wgt.RDat	chr1:45848800-45849450	1	45848800	45849450		rs4660852	-2.785	rs7553318	0.005968	1.023	-2.77419	12	4	lasso.as	0.3171	0.0011	-2.93837	0.0033
analysis/predict/WEIGHTS//chr1:45956700-45957400.wgt.RDat	chr1:45956700-45957400	1	45956700	45957400		rs11211124	-2.719	rs12042481	-0.00998	-2.946	2	19	1	top1.qtl	0.04946	0.006	-2	0.0455
analysis/predict/WEIGHTS//chr1:46016100-46016750.wgt.RDat	chr1:46016100-46016750	1	46016100	46016750		rs12049503	-3.845	rs518365	0.24	1.122	0.34568	19	1	top1.as	0.26702	0.012	2.88191	0.00395
analysis/predict/WEIGHTS//chr1:46505050-46505700.wgt.RDat	chr1:46505050-46505700	1	46505050	46505700		rs4388641	3.933	rs1707321	0.0129	-3.264	-0.525	19	1	top1.qtl	0.0973	0.00016	0.525	0.6
analysis/predict/WEIGHTS//chr1:46598150-46598850.wgt.RDat	chr1:46598150-46598850	1	46598150	46598850		rs1707303	-3.693	rs1707303	0.0465	0.748	-3.69318	9	1	top1.as	0.1579	0.0079	2.63717	0.00836
analysis/predict/WEIGHTS//chr1:46637400-46638100.wgt.RDat	chr1:46637400-46638100	1	46637400	46638100		rs3845300	-2.684	rs11584024	-0.0639	1.676	1.65179	14	1	top1.as	0.371	0.0072	1.67073	0.0948
analysis/predict/WEIGHTS//chr1:46861550-46862700.wgt.RDat	chr1:46861550-46862700	1	46861550	46862700		rs17361950	4.557	rs6695043	-0.0171	3.666	4.44318	18	1	top1	0.08	0.0006	4.44318	8.86e-06
analysis/predict/WEIGHTS//chr1:47789200-47789900.wgt.RDat	chr1:47789200-47789900	1	47789200	47789900		rs11211512	1.92	rs3125635	0.151	4.612	-0.50909	19	1	top1	0.09	0.00029	-0.50909	0.611
analysis/predict/WEIGHTS//chr1:4814100-4814600.wgt.RDat	chr1:4814100-4814600	1	4814100	4814600		rs12022212	-1.769	rs3766977	-0.0433	-2.203	-1.29268	44	1	top1	0.039	0.014	1.29268	0.196
analysis/predict/WEIGHTS//chr1:48436500-48437050.wgt.RDat	chr1:48436500-48437050	1	48436500	48437050		rs7554975	-1.542	rs12407078	0.311	4.696	-0.77174	15	1	top1.qtl	0.11	8.4e-05	-0.32967	0.742
analysis/predict/WEIGHTS//chr1:48768250-48768800.wgt.RDat	chr1:48768250-48768800	1	48768250	48768800		rs7536253	0.959	rs1056042	-0.00691	-1.906	-0.60241	10	1	top1.qtl	0.049	0.0063	0.61446	0.539
analysis/predict/WEIGHTS//chr1:5030550-5031050.wgt.RDat	chr1:5030550-5031050	1	5030550	5031050		rs12754637	-1.25	rs7518523	0.0707	-3.79	0.29592	36	33	lasso.plasma	0.074	0.00097	0.62243	0.534
analysis/predict/WEIGHTS//chr1:52108350-52108850.wgt.RDat	chr1:52108350-52108850	1	52108350	52108850		rs6695853	1.143	rs7415684	-0.0631	0.798	1.10714	2	1	top1.as	0.485	0.01	1.14286	0.253
analysis/predict/WEIGHTS//chr1:53642000-53642800.wgt.RDat	chr1:53642000-53642800	1	53642000	53642800		rs12731127	2.57	rs3102047	0.165	-5.277	1.69474	26	1	top1	0.15	2.9e-06	-1.69474	0.0901
analysis/predict/WEIGHTS//chr1:53685900-53686500.wgt.RDat	chr1:53685900-53686500	1	53685900	53686500		rs2046138	2.171	rs17785382	0.652	-4.374	-1.44578	20	1	top1	0.6516	1.2e-05	1.44578	0.148
analysis/predict/WEIGHTS//chr1:53761450-53761900.wgt.RDat	chr1:53761450-53761900	1	53761450	53761900		rs1288479	-1.509	rs17108202	0.395	3.109	-0.27059	28	1	top1	0.3954	0.004	-0.27059	0.787
analysis/predict/WEIGHTS//chr1:54953750-54954450.wgt.RDat	chr1:54953750-54954450	1	54953750	54954450		rs4927133	2.67	rs1888182	-0.017106	2.207	0.44706	20	15	lasso.as	0.28137	0.0022	-0.53135	0.595
analysis/predict/WEIGHTS//chr1:55230100-55230700.wgt.RDat	chr1:55230100-55230700	1	55230100	55230700		rs11577368	-1.79	rs2527847	0.0166	-1.201	-0.00971	30	1	top1.qtl	0.091	0.00026	0.46809	0.64
analysis/predict/WEIGHTS//chr1:55348000-55348850.wgt.RDat	chr1:55348000-55348850	1	55348000	55348850		rs642737	-1.535	rs12025718	-0.0244	1.32	-0.86957	18	1	top1.qtl	0.231	0.0089	-0.69879	0.485
analysis/predict/WEIGHTS//chr1:55353800-55354550.wgt.RDat	chr1:55353800-55354550	1	55353800	55354550		rs642737	-1.535	rs3170766	0.235	-5.166	-0.79268	12	1	top1.qtl	0.2913	2.9e-06	0.79268	0.428
analysis/predict/WEIGHTS//chr1:55822300-55822850.wgt.RDat	chr1:55822300-55822850	1	55822300	55822850		rs11206570	2.116	rs7555489	0.526	-1.364	1	35	1	top1	0.526	0.00023	-1	0.317
analysis/predict/WEIGHTS//chr1:56046350-56047050.wgt.RDat	chr1:56046350-56047050	1	56046350	56047050		rs12026971	2.289	rs17112456	-0.0273	0.68	-1.76786	45	1	top1	0.068	0.0014	-1.76786	0.0771
analysis/predict/WEIGHTS//chr1:56059000-56059550.wgt.RDat	chr1:56059000-56059550	1	56059000	56059550		rs12026971	2.289	rs6694786	-0.00694	-3.719	-1.0315	45	1	top1.qtl	0.1278	1.5e-05	1.0315	0.302
analysis/predict/WEIGHTS//chr1:56072350-56072950.wgt.RDat	chr1:56072350-56072950	1	56072350	56072950		rs12026971	2.289	rs11206633	0.137622	-4.483	0.6125	41	5	lasso.as	0.295	9.8e-05	-1.01911	0.308
analysis/predict/WEIGHTS//chr1:5611650-5612050.wgt.RDat	chr1:5611650-5612050	1	5611650	5612050		rs9439614	1.425	rs1578717	0.159	-3.31	0.33043	25	5	lasso.plasma	0.051	0.0052	0.28111	0.779
analysis/predict/WEIGHTS//chr1:56159850-56160650.wgt.RDat	chr1:56159850-56160650	1	56159850	56160650		rs17112675	-3.228	rs2671238	0.579	-1.313	0.91463	23	1	top1	0.5791	0.00019	-0.91463	0.36
analysis/predict/WEIGHTS//chr1:57076350-57076900.wgt.RDat	chr1:57076350-57076900	1	57076350	57076900		rs11206875	-1.103	rs12136817	-0.0414	-2.027	-0.68889	9	1	top1	0.039	0.013	0.68889	0.491
analysis/predict/WEIGHTS//chr1:57097450-57098050.wgt.RDat	chr1:57097450-57098050	1	57097450	57098050		rs11206883	1.117	rs11206887	-0.073626	-2.149	-0.29914	17	2	lasso.as	0.045	0.0086	-0.1583	0.874
analysis/predict/WEIGHTS//chr1:57246550-57247250.wgt.RDat	chr1:57246550-57247250	1	57246550	57247250		rs7548888	1.615	rs2064423	0.0932	4.215	1.07317	25	1	top1.as	0.092	0.00025	1.07317	0.283
analysis/predict/WEIGHTS//chr1:58139000-58139450.wgt.RDat	chr1:58139000-58139450	1	58139000	58139450		rs12085345	2.615	rs4568858	0.219	4.951	1.90698	29	1	top1	0.13	1.7e-05	1.90698	0.0565
analysis/predict/WEIGHTS//chr1:58648650-58649600.wgt.RDat	chr1:58648650-58649600	1	58648650	58649600		rs3904916	-1.664	rs13374932	0.211	-5.726	-1.24771	18	1	top1.as	0.27	3.9e-05	0.59406	0.552
analysis/predict/WEIGHTS//chr1:59350800-59351450.wgt.RDat	chr1:59350800-59351450	1	59350800	59351450		rs2764908	1.771	rs2764908	-0.00918	-2.77	1.77099	19	1	top1.as	0.059	0.0029	-1.77099	0.0766
analysis/predict/WEIGHTS//chr1:59522850-59523300.wgt.RDat	chr1:59522850-59523300	1	59522850	59523300		rs17530657	1.858	rs4622084	-0.0475	-1.605	-1.3494	19	1	top1.as	0.24	0.012	-0.84746	0.397
analysis/predict/WEIGHTS//chr1:59581200-59581950.wgt.RDat	chr1:59581200-59581950	1	59581200	59581950		rs332230	2.165	rs10889129	-0.0908	2.281	1.81481	27	1	top1.as	0.4236	0.013	2.12037	0.034
analysis/predict/WEIGHTS//chr1:59680450-59680800.wgt.RDat	chr1:59680450-59680800	1	59680450	59680800		rs331635	1.819	rs7543389	0.127	-5.343	0.85714	28	1	top1.qtl	0.21	2.7e-08	-0.85714	0.391
analysis/predict/WEIGHTS//chr1:59752100-59752550.wgt.RDat	chr1:59752100-59752550	1	59752100	59752550		rs7521970	-1.352	rs333681	0.422	2.25	0.60294	20	1	top1	0.4215	0.007	0.60294	0.547
analysis/predict/WEIGHTS//chr1:60139700-60140550.wgt.RDat	chr1:60139700-60140550	1	60139700	60140550		rs12027119	-2.46	rs4578243	0.102	2.402	-1.40952	13	1	lasso	0.3162	0.0058	-1.39048	0.164
analysis/predict/WEIGHTS//chr1:60554250-60554900.wgt.RDat	chr1:60554250-60554900	1	60554250	60554900		rs684371	-2.728	rs11207572	-0.0476	2.357	-1.05556	23	12	lasso	0.066	0.0018	0.28778	0.774
analysis/predict/WEIGHTS//chr1:60568300-60568900.wgt.RDat	chr1:60568300-60568900	1	60568300	60568900		rs684371	-2.728	rs680191	0.609	-1.586	-0.3278	31	1	top1	0.609	0.0022	0.3278	0.743
analysis/predict/WEIGHTS//chr1:60740200-60741000.wgt.RDat	chr1:60740200-60741000	1	60740200	60741000		rs12726383	2.667	rs987443	0.252	-1.142	0.15464	16	1	top1	0.252	0.014	-0.15464	0.877
analysis/predict/WEIGHTS//chr1:60814700-60815050.wgt.RDat	chr1:60814700-60815050	1	60814700	60815050		rs12137879	-1.068	rs1354085	0.396	3.322	-0.50331	16	4	lasso.plasma	0.59	0.0029	-1.51234	0.13
analysis/predict/WEIGHTS//chr1:61598500-61599500.wgt.RDat	chr1:61598500-61599500	1	61598500	61599500		rs6693597	-1.847	rs4915729	0.332	3.848	-0.9079	21	1	top1.qtl	0.352	0.0013	-0.90789	0.364
analysis/predict/WEIGHTS//chr1:61788400-61788900.wgt.RDat	chr1:61788400-61788900	1	61788400	61788900		rs766488	-3.831	rs2782541	0.0162	-2.444	-2.00862	18	1	top1.qtl	0.055	0.0041	3.41237	0.000644
analysis/predict/WEIGHTS//chr1:64166800-64167300.wgt.RDat	chr1:64166800-64167300	1	64166800	64167300		rs2135432	-1.955	rs1354719	0.0588	-3.586	-0.55629	34	1	top1.qtl	0.062	0.0023	0.55629	0.578
analysis/predict/WEIGHTS//chr1:64961350-64962050.wgt.RDat	chr1:64961350-64962050	1	64961350	64962050		rs305569	-0.56	rs4915981	-0.00951	-1.72	-0.12821	18	1	top1.as	0.054	0.0044	-0.19096	0.849
analysis/predict/WEIGHTS//chr1:66053000-66053400.wgt.RDat	chr1:66053000-66053400	1	66053000	66053400		rs10789190	1.309	rs2376016	-0.0355	-2.586	0.55208	31	1	top1.as	0.2	0.0098	-0.55208	0.581
analysis/predict/WEIGHTS//chr1:66643100-66643600.wgt.RDat	chr1:66643100-66643600	1	66643100	66643600		rs6656638	-1.988	rs953165	0.317	0.831	0.48276	17	1	top1.as	0.0399	0.012	-0.32954	0.742
analysis/predict/WEIGHTS//chr1:67008350-67008900.wgt.RDat	chr1:67008350-67008900	1	67008350	67008900		rs10493407	-1.805	rs11208897	0.162	-2.513	-0.04545	44	1	top1.qtl	0.048	0.0067	1.18095	0.238
analysis/predict/WEIGHTS//chr1:67170500-67171350.wgt.RDat	chr1:67170500-67171350	1	67170500	67171350		rs536410	1.8	rs569827	-0.054469	-1.737	0.77174	35	1	lasso.as	0.039	0.013	-1.14019	0.254
analysis/predict/WEIGHTS//chr1:67617550-67618150.wgt.RDat	chr1:67617550-67618150	1	67617550	67618150		rs11465770	-2.191	rs12041056	0.0592	-3.282	2.13415	21	1	top1.qtl	0.1777	0.0076	-2.13415	0.0328
analysis/predict/WEIGHTS//chr1:67848000-67848500.wgt.RDat	chr1:67848000-67848500	1	67848000	67848500		rs11209063	2.128	rs2029859	0.187	-5.568	1.58537	17	1	top1.qtl	0.16	8.9e-07	-1.58537	0.113
analysis/predict/WEIGHTS//chr1:68226100-68226850.wgt.RDat	chr1:68226100-68226850	1	68226100	68226850		rs2803460	-1.186	rs652947	0.191666	2.173	-0.92046	24	6	lasso.as	0.295	0.0065	0.2715	0.786
analysis/predict/WEIGHTS//chr1:68680550-68681100.wgt.RDat	chr1:68680550-68681100	1	68680550	68681100		rs12047406	-1.349	rs7511845	-0.0357	1.641	0.65625	27	1	lasso	0.283	0.0064	0.65625	0.512
analysis/predict/WEIGHTS//chr1:68863600-68864150.wgt.RDat	chr1:68863600-68864150	1	68863600	68864150		rs1925952	-2.224	rs7515572	0.00365	-2.914	-1.39286	23	1	top1.qtl	0.052	0.0049	1.39286	0.164
analysis/predict/WEIGHTS//chr1:68991550-68992000.wgt.RDat	chr1:68991550-68992000	1	68991550	68992000		rs10889771	-1.607	rs12756859	-0.0653	3.441	-0.64368	22	4	lasso.plasma	0.091	0.00026	-0.89151	0.373
analysis/predict/WEIGHTS//chr1:69010150-69011050.wgt.RDat	chr1:69010150-69011050	1	69010150	69011050		rs3892217	1.805	rs2181862	0.013	6.801	-0.64368	20	1	top1.qtl	0.549	1.6e-24	-0.64368	0.52
analysis/predict/WEIGHTS//chr1:69183500-69184200.wgt.RDat	chr1:69183500-69184200	1	69183500	69184200		rs995841	1.399	rs4926373	-0.0594	1.733	-1.10274	10	4	lasso.plasma	0.04	0.012	0.06026	0.952
analysis/predict/WEIGHTS//chr1:69760600-69761500.wgt.RDat	chr1:69760600-69761500	1	69760600	69761500		rs720233	-0.359	rs6681085	0.0274	1.266	-0.21429	8	1	top1.as	0.3409	0.004	0.24706	0.805
analysis/predict/WEIGHTS//chr1:69772700-69773150.wgt.RDat	chr1:69772700-69773150	1	69772700	69773150		rs2815466	0.659	rs7533317	0.0593	4.34	-0.24706	9	1	top1.qtl	0.092	0.00024	-0.3587	0.72
analysis/predict/WEIGHTS//chr1:71076400-71077000.wgt.RDat	chr1:71076400-71077000	1	71076400	71077000		rs10889882	1.394	rs12040973	0.127	5.106	-0.82927	19	5	lasso	0.26	2.7e-10	0.48858	0.625
analysis/predict/WEIGHTS//chr1:71769000-71769900.wgt.RDat	chr1:71769000-71769900	1	71769000	71769900		rs6695355	-3.045	rs12403261	0.0377	4.151	-3.03571	11	1	top1.qtl	0.088	0.00033	-3.03571	0.0024
analysis/predict/WEIGHTS//chr1:73220450-73220800.wgt.RDat	chr1:73220450-73220800	1	73220450	73220800		rs11210049	-1.489	rs11210049	-0.0907	-2.717	-1.48864	19	1	top1	0.079	0.00064	1.48864	0.137
analysis/predict/WEIGHTS//chr1:73786950-73787500.wgt.RDat	chr1:73786950-73787500	1	73786950	73787500		rs4300176	1.561	rs4300176	0.0958	-2.373	1.56098	11	3	lasso	0.35662	0.014	-1.58959	0.112
analysis/predict/WEIGHTS//chr1:75468750-75469450.wgt.RDat	chr1:75468750-75469450	1	75468750	75469450		rs17621530	-1.574	rs3856036	0.198	4.222	0.08333	13	1	top1.as	0.0853	0.0004	0.08333	0.934
analysis/predict/WEIGHTS//chr1:75958000-75958550.wgt.RDat	chr1:75958000-75958550	1	75958000	75958550		rs11163461	-0.99	rs1571983	0.408	3.027	-0.52874	14	1	top1	0.4084	0.015	-0.52874	0.597
analysis/predict/WEIGHTS//chr1:76190000-76190400.wgt.RDat	chr1:76190000-76190400	1	76190000	76190400		rs11579752	1.517	rs1146579	0.0707	0.767	-0.09302	19	1	top1.qtl	0.043	0.0097	-0.09302	0.926
analysis/predict/WEIGHTS//chr1:77152900-77153500.wgt.RDat	chr1:77152900-77153500	1	77152900	77153500		rs507436	1.583	rs689423	-0.0624	-1.7	-1.20732	27	1	top1	0.037	0.015	1.20732	0.227
analysis/predict/WEIGHTS//chr1:78687800-78688400.wgt.RDat	chr1:78687800-78688400	1	78687800	78688400		rs2181453	-1.701	rs11162436	-0.0894	2.246	-1.51724	13	6	lasso.plasma	0.097	0.00016	-2.56315	0.0104
analysis/predict/WEIGHTS//chr1:78938700-78939100.wgt.RDat	chr1:78938700-78939100	1	78938700	78939100		rs3753380	1.559	rs3753380	0.0676	0.988	1.55914	12	1	top1.qtl	0.042	0.01	-0.76316	0.445
analysis/predict/WEIGHTS//chr1:79014850-79015900.wgt.RDat	chr1:79014850-79015900	1	79014850	79015900		rs1322926	-0.814	rs12737480	-0.00583	-0.579	-0.73276	16	1	top1	0.1443	4.2e-06	0.73276	0.464
analysis/predict/WEIGHTS//chr1:79321650-79322350.wgt.RDat	chr1:79321650-79322350	1	79321650	79322350		rs12026347	-2.885	rs6680564	0.00817	-1.586	-1.31915	18	1	top1.as	0.3577	0.0012	0.94949	0.342
analysis/predict/WEIGHTS//chr1:79332250-79333450.wgt.RDat	chr1:79332250-79333450	1	79332250	79333450		rs7543576	-2.878	rs1686341	-0.00802	-1.168	-2.05	27	1	top1	0.075	0.00088	2.05	0.0404
analysis/predict/WEIGHTS//chr1:79353300-79354100.wgt.RDat	chr1:79353300-79354100	1	79353300	79354100		rs7525345	-3.22	rs1248480	0.041	3.425	0.28571	29	1	top1	0.063	0.0021	0.28571	0.775
analysis/predict/WEIGHTS//chr1:79463500-79463950.wgt.RDat	chr1:79463500-79463950	1	79463500	79463950		rs12406049	2.287	rs2065486	-0.0766	-1.795	0.23853	20	9	lasso.plasma	0.0474	0.007	-0.11489	0.909
analysis/predict/WEIGHTS//chr1:7950650-7951250.wgt.RDat	chr1:7950650-7951250	1	7950650	7951250		rs2066978	-1.212	rs227163	0.226135	3.278	-0.14458	19	9	lasso.as	0.5673	0.0024	-0.94986	0.342
analysis/predict/WEIGHTS//chr1:79589750-79590200.wgt.RDat	chr1:79589750-79590200	1	79589750	79590200		rs12063711	-2.112	rs17102832	0.031	-2.201	0.02804	32	5	lasso.plasma	0.215	0.012	0.17717	0.859
analysis/predict/WEIGHTS//chr1:79614950-79615600.wgt.RDat	chr1:79614950-79615600	1	79614950	79615600		rs12063711	-2.112	rs7516588	0.444	-7.724	0.63218	27	1	top1.qtl	0.41	1.1e-16	-0.31765	0.751
analysis/predict/WEIGHTS//chr1:79616650-79617200.wgt.RDat	chr1:79616650-79617200	1	79616650	79617200		rs12063711	-2.112	rs7537452	0.55	-6.724	0.80233	27	1	top1.as	0.28	5.5e-11	-0.62791	0.53
analysis/predict/WEIGHTS//chr1:8021250-8022000.wgt.RDat	chr1:8021250-8022000	1	8021250	8022000		rs225119	1.573	rs4908488	0.0198	-1.958	0.93103	13	1	top1.as	0.3665	2.6e-05	-1.32632	0.185
analysis/predict/WEIGHTS//chr1:80744550-80745050.wgt.RDat	chr1:80744550-80745050	1	80744550	80745050		rs1776284	-2	rs12759041	-0.0906	-2.468	0.87023	17	1	top1.qtl	0.071	0.0012	-0.87023	0.384
analysis/predict/WEIGHTS//chr1:80857900-80858700.wgt.RDat	chr1:80857900-80858700	1	80857900	80858700		rs17390391	-0.937	rs10518644	-0.0277	2.352	0.39344	24	1	top1.qtl	0.051	0.0053	0.39344	0.694
analysis/predict/WEIGHTS//chr1:81233950-81234650.wgt.RDat	chr1:81233950-81234650	1	81233950	81234650		rs7531477	-1.713	rs2892671	-0.0248	2.469	0.05941	19	1	top1	0.043	0.0099	0.05941	0.953
analysis/predict/WEIGHTS//chr1:81873050-81873700.wgt.RDat	chr1:81873050-81873700	1	81873050	81873700		rs3934566	-3.676	rs11589322	-0.0204	-2.978	-0.06863	36	1	top1.qtl	0.047	0.0072	-2.2069	0.0273
analysis/predict/WEIGHTS//chr1:81988650-81989350.wgt.RDat	chr1:81988650-81989350	1	81988650	81989350		rs2296234	1.484	rs11163323	0.00472	3.378	0.41414	27	1	top1.qtl	0.0631	0.0021	0.41414	0.679
analysis/predict/WEIGHTS//chr1:82193500-82194250.wgt.RDat	chr1:82193500-82194250	1	82193500	82194250		rs17131763	-1.765	rs17458695	0.0325	-2.482	-1.05952	31	1	top1.as	0.1237	0.0057	1.0119	0.312
analysis/predict/WEIGHTS//chr1:8304300-8304850.wgt.RDat	chr1:8304300-8304850	1	8304300	8304850		rs7513908	2.451	rs7528376	-0.0459	3.016	-1.31765	20	3	lasso.plasma	0.045	0.0082	-1.20469	0.228
analysis/predict/WEIGHTS//chr1:83151050-83151700.wgt.RDat	chr1:83151050-83151700	1	83151050	83151700		rs319656	3.019	rs10874326	0.0128	-3.037	1.39535	46	1	top1	0.051	0.0054	-1.39535	0.163
analysis/predict/WEIGHTS//chr1:8318800-8320250.wgt.RDat	chr1:8318800-8320250	1	8318800	8320250		rs7513908	2.451	rs4908744	0.144	-1.817	0.02381	13	1	top1	0.1441	0.011	-0.02381	0.981
analysis/predict/WEIGHTS//chr1:83244900-83245300.wgt.RDat	chr1:83244900-83245300	1	83244900	83245300		rs2078370	-1.896	rs11583990	0.149042	3.145	-0.50562	42	6	lasso.as	0.053	0.0045	-0.86823	0.385
analysis/predict/WEIGHTS//chr1:83336150-83336750.wgt.RDat	chr1:83336150-83336750	1	83336150	83336750		rs876339	1.128	rs7532665	0.359	5.692	0.18293	14	1	top1.qtl	0.19	7e-08	0.18293	0.855
analysis/predict/WEIGHTS//chr1:83551900-83552500.wgt.RDat	chr1:83551900-83552500	1	83551900	83552500		rs10047189	-2.466	rs537877	-0.0164	-3.765	2.22353	21	6	lasso.plasma	0.157	1.5e-06	-2.20623	0.0274
analysis/predict/WEIGHTS//chr1:84219800-84220400.wgt.RDat	chr1:84219800-84220400	1	84219800	84220400		rs714280	-1.087	rs9787335	0.212	2.42	0.2963	47	1	top1.qtl	0.21094	0.011	-0.11811	0.906
analysis/predict/WEIGHTS//chr1:84722500-84723250.wgt.RDat	chr1:84722500-84723250	1	84722500	84723250		rs634904	1.723	rs316689	-0.0184	-2.289	-0.25843	39	1	top1.as	0.1789	0.015	0.30994	0.757
analysis/predict/WEIGHTS//chr1:8484600-8485250.wgt.RDat	chr1:8484600-8485250	1	8484600	8485250		rs2661868	-0.888	rs301789	-0.00458	-3.292	0.07778	16	1	top1.as	0.053	0.0046	-0.88776	0.375
analysis/predict/WEIGHTS//chr1:84892000-84892650.wgt.RDat	chr1:84892000-84892650	1	84892000	84892650		rs12034438	1.588	rs6576701	0.0114	-2.522	1.2	25	1	top1.as	0.068	0.0015	-1.2	0.23
analysis/predict/WEIGHTS//chr1:85084850-85085500.wgt.RDat	chr1:85084850-85085500	1	85084850	85085500		rs12035493	-1.621	rs12127432	0.15	-1.656	0.07514	24	1	top1.qtl	0.069	0.0014	-0.07514	0.94
analysis/predict/WEIGHTS//chr1:85287600-85288050.wgt.RDat	chr1:85287600-85288050	1	85287600	85288050		rs1325272	-3.392	rs9728717	0.0472	3.146	-0.42718	34	1	top1	0.054	0.0044	-0.42718	0.669
analysis/predict/WEIGHTS//chr1:85338700-85339550.wgt.RDat	chr1:85338700-85339550	1	85338700	85339550		rs1886644	-2.39	rs999915	0.105613	4.185	-0.8125	32	3	lasso.as	0.044	0.0091	0.27733	0.782
analysis/predict/WEIGHTS//chr1:85339950-85340600.wgt.RDat	chr1:85339950-85340600	1	85339950	85340600		rs1886644	-2.39	rs10158066	0.105	-5.259	0.20238	31	1	top1	0.18	1.7e-07	-0.20238	0.84
analysis/predict/WEIGHTS//chr1:8542900-8543550.wgt.RDat	chr1:8542900-8543550	1	8542900	8543550		rs4908762	-1.17	rs6577488	-0.0612	-2.024	-1.0814	9	1	top1.qtl	0.039	0.014	1.0814	0.28
analysis/predict/WEIGHTS//chr1:85680350-85680800.wgt.RDat	chr1:85680350-85680800	1	85680350	85680800		rs10747317	-2.761	rs709790	-0.0895	-1.471	-1.03529	22	1	top1	0.055	0.0041	1.03529	0.301
analysis/predict/WEIGHTS//chr1:87334700-87335100.wgt.RDat	chr1:87334700-87335100	1	87334700	87335100		rs492745	1.407	rs554213	0.183	-5.366	0.58763	14	1	top1.as	0.19	1.4e-07	-0.58763	0.557
analysis/predict/WEIGHTS//chr1:87336500-87337300.wgt.RDat	chr1:87336500-87337300	1	87336500	87337300		rs492745	1.407	rs6703932	0.165	1.206	1.38554	12	1	top1.as	0.5214	0.0019	1.38554	0.166
analysis/predict/WEIGHTS//chr1:88180650-88181400.wgt.RDat	chr1:88180650-88181400	1	88180650	88181400		rs305457	5.505	rs1434431	0.211	3.357	3.72152	24	1	top1.as	0.2115	0.0022	4.70886	2.49e-06
analysis/predict/WEIGHTS//chr1:89144000-89144650.wgt.RDat	chr1:89144000-89144650	1	89144000	89144650		rs10922478	0.494	rs7518750	-0.0187	2.72	0.1	9	1	top1.qtl	0.048	0.0066	-0.44048	0.66
analysis/predict/WEIGHTS//chr1:9046100-9046700.wgt.RDat	chr1:9046100-9046700	1	9046100	9046700		rs3765964	-2.316	rs6672506	-0.0257	2.606	1.54348	30	1	top1	0.122	2.5e-05	1.54348	0.123
analysis/predict/WEIGHTS//chr1:9061600-9062950.wgt.RDat	chr1:9061600-9062950	1	9061600	9062950		rs10746482	-2.2	rs17392147	0.0673	2.436	0.6194	32	1	top1.as	0.17	4.5e-07	-0.97826	0.328
analysis/predict/WEIGHTS//chr1:92106300-92106950.wgt.RDat	chr1:92106300-92106950	1	92106300	92106950		rs17504775	2.159	rs2478178	0.2	5.509	0.78401	37	1	top1.qtl	0.2	6.2e-08	0.78401	0.433
analysis/predict/WEIGHTS//chr1:92208200-92208800.wgt.RDat	chr1:92208200-92208800	1	92208200	92208800		rs17131553	-2.973	rs284176	-0.028499	-3.45	0.55814	48	19	lasso.as	0.1961	0.004	-1.33108	0.183
analysis/predict/WEIGHTS//chr1:9302600-9303000.wgt.RDat	chr1:9302600-9303000	1	9302600	9303000		rs12402600	-2.71	rs1009940	-0.0357	1.714	-1.18391	22	2	lasso	0.4651	0.0014	0.92772	0.354
analysis/predict/WEIGHTS//chr1:9304600-9305100.wgt.RDat	chr1:9304600-9305100	1	9304600	9305100		rs12402600	-2.71	rs2268175	-0.0586	2.476	-0.06897	22	8	lasso	0.114	4.6e-05	2.35045	0.0188
analysis/predict/WEIGHTS//chr1:93811100-93811700.wgt.RDat	chr1:93811100-93811700	1	93811100	93811700		rs10782959	-0.989	rs698927	0.343	-1.131	-0.07619	15	1	top1	0.3428	0.008	0.07619	0.939
analysis/predict/WEIGHTS//chr1:94039300-94039900.wgt.RDat	chr1:94039300-94039900	1	94039300	94039900		rs236330	1.043	rs17110063	0.0398	-3.577	0.19608	14	1	top1	0.092	0.00023	-0.19608	0.845
analysis/predict/WEIGHTS//chr1:94050200-94051300.wgt.RDat	chr1:94050200-94051300	1	94050200	94051300		rs6677770	1.097	rs17110063	0.225	-5.087	0.19608	16	13	lasso.plasma	0.2515	4.8e-05	0.12401	0.901
analysis/predict/WEIGHTS//chr1:94344550-94345050.wgt.RDat	chr1:94344550-94345050	1	94344550	94345050		rs10489605	-1.45	rs7523787	0.178	-1.117	-0.56322	27	1	top1.as	0.286	0.00027	-0.48276	0.629
analysis/predict/WEIGHTS//chr1:94404000-94404300.wgt.RDat	chr1:94404000-94404300	1	94404000	94404300		rs10874819	0.711	rs4847269	0.125	-1.05	0.20225	11	1	top1.as	0.041	0.012	0.21186	0.832
analysis/predict/WEIGHTS//chr1:9496000-9497000.wgt.RDat	chr1:9496000-9497000	1	9496000	9497000		rs12034064	2.323	rs9726404	0.165	-4.148	0.94737	25	1	top1	0.072	0.0011	-0.94737	0.343
analysis/predict/WEIGHTS//chr1:9497850-9498550.wgt.RDat	chr1:9497850-9498550	1	9497850	9498550		rs12034064	2.323	rs9659326	0.00137	4.006	-0.22642	25	8	lasso.plasma	0.114	4.4e-05	-0.54415	0.586
analysis/predict/WEIGHTS//chr1:95053000-95053750.wgt.RDat	chr1:95053000-95053750	1	95053000	95053750		rs1146509	-1.963	rs12128453	0.194	-6.089	-1.63043	33	1	top1	0.17	5.6e-07	1.63043	0.103
analysis/predict/WEIGHTS//chr1:95055900-95056350.wgt.RDat	chr1:95055900-95056350	1	95055900	95056350		rs698941	1.857	rs1041042	0.61	4.591	-0.30693	30	1	top1.qtl	0.669	0.00047	-0.30693	0.759
analysis/predict/WEIGHTS//chr1:95119550-95120500.wgt.RDat	chr1:95119550-95120500	1	95119550	95120500		rs2996284	1.286	rs10782987	0.112	-4.943	0.53192	39	1	top1	0.12	2e-05	-0.53191	0.595
analysis/predict/WEIGHTS//chr1:95223400-95223900.wgt.RDat	chr1:95223400-95223900	1	95223400	95223900		rs17414905	1.626	rs7525706	-0.082642	2.234	-0.52229	30	10	lasso.as	0.5752	0.0014	1.0223	0.307
analysis/predict/WEIGHTS//chr1:95561250-95562100.wgt.RDat	chr1:95561250-95562100	1	95561250	95562100		rs12119469	-1.352	rs12755096	-0.00631	-2.55	1.07368	24	5	lasso.plasma	0.1265	0.0071	-0.02198	0.982
analysis/predict/WEIGHTS//chr1:95818150-95819000.wgt.RDat	chr1:95818150-95819000	1	95818150	95819000		rs11165403	-1.932	rs12142832	0.214	-1.201	-0.14286	26	1	top1	0.21359	0.0046	0.14286	0.886
analysis/predict/WEIGHTS//chr1:95835600-95836750.wgt.RDat	chr1:95835600-95836750	1	95835600	95836750		rs11165403	-1.932	rs7524217	0.0185	2.419	-1.13402	25	1	top1.as	0.041	0.011	-1.13402	0.257
analysis/predict/WEIGHTS//chr1:95837350-95838000.wgt.RDat	chr1:95837350-95838000	1	95837350	95838000		rs11165403	-1.932	rs2064662	-0.0258	2.117	0.44231	26	1	top1.as	0.0438	0.0092	1.00279	0.316
analysis/predict/WEIGHTS//chr1:9604400-9604950.wgt.RDat	chr1:9604400-9604950	1	9604400	9604950		rs12040542	-1.545	rs12040542	0.0709	1.736	-1.54472	11	1	top1.qtl	0.4231	0.0027	-1.1215	0.262
analysis/predict/WEIGHTS//chr1:97237950-97238550.wgt.RDat	chr1:97237950-97238550	1	97237950	97238550		rs7540478	2.067	rs12075245	0.00774	-1.097	1.95098	14	1	top1.qtl	0.073	0.001	1.30597	0.192
analysis/predict/WEIGHTS//chr1:97880350-97881000.wgt.RDat	chr1:97880350-97881000	1	97880350	97881000		rs1556798	-2.209	rs12024396	-0.03506	2.705	-1.39024	50	17	lasso.as	0.3778	0.003	0.21657	0.829
analysis/predict/WEIGHTS//chr1:9841700-9842750.wgt.RDat	chr1:9841700-9842750	1	9841700	9842750		rs4845977	1.418	rs4845976	-0.000636	-1.424	0.90729	9	3	lasso	0.049	0.0062	-0.93142	0.352
analysis/predict/WEIGHTS//chr1:98532250-98533000.wgt.RDat	chr1:98532250-98533000	1	98532250	98533000		rs2802530	-2.073	rs1782812	-0.0769	-1.79	-0.63636	15	1	top1.qtl	0.051	0.0054	-1.1134	0.266
analysis/predict/WEIGHTS//chr1:99800550-99801050.wgt.RDat	chr1:99800550-99801050	1	99800550	99801050		rs11166233	2.41	rs10783111	0.187	1.542	1.61798	25	3	lasso.plasma	0.2315	0.014	1.37486	0.169
analysis/predict/WEIGHTS//chr10:100230600-100231050.wgt.RDat	chr10:100230600-100231050	10	100230600	100231050		rs1925647	-2.747	rs1998756	0.368586	-3.454	-0.42857	31	1	top1	0.36859	0.002	0.42857	0.668
analysis/predict/WEIGHTS//chr10:100839800-100840650.wgt.RDat	chr10:100839800-100840650	10	100839800	100840650		rs1954294	-1.046	rs1342581	-0.03043	2.184	-0.46259	14	4	lasso.as	0.3971	0.0069	0.23384	0.815
analysis/predict/WEIGHTS//chr10:1016250-1016750.wgt.RDat	chr10:1016250-1016750	10	1016250	1016750		rs11253540	4.089	rs6560863	0.003621	1.121	3.11111	21	1	top1.qtl	0.3359	0.0055	-0.0495	0.961
analysis/predict/WEIGHTS//chr10:102685250-102685950.wgt.RDat	chr10:102685250-102685950	10	102685250	102685950		rs11593290	-0.559	rs12219858	0.138199	1.325	0.21951	20	1	top1.as	0.27805	0.0033	-0.55882	0.576
analysis/predict/WEIGHTS//chr10:104401700-104402150.wgt.RDat	chr10:104401700-104402150	10	104401700	104402150		rs12241712	-8.138	rs11596235	0.676738	2.953	-1.22727	24	1	top1	0.67674	0.00022	-1.22727	0.22
analysis/predict/WEIGHTS//chr10:104417750-104418700.wgt.RDat	chr10:104417750-104418700	10	104417750	104418700		rs12241712	-8.138	rs3850699	-0.017685	2.205	-8.09195	20	1	top1.as	0.1323	0.013	-0.88636	0.375
analysis/predict/WEIGHTS//chr10:104484500-104484950.wgt.RDat	chr10:104484500-104484950	10	104484500	104484950		rs12775883	-7.2	rs12775883	-0.048089	-2.158	-7.2	17	1	top1	0.041	0.011	7.2	6.02e-13
analysis/predict/WEIGHTS//chr10:104536700-104537150.wgt.RDat	chr10:104536700-104537150	10	104536700	104537150		rs1475642	-5.102	rs10786708	0.030664	-2.017	4.51163	22	1	top1.as	0.04	0.012	-2.51648	0.0119
analysis/predict/WEIGHTS//chr10:104914200-104914700.wgt.RDat	chr10:104914200-104914700	10	104914200	104914700		rs2148198	-2.805	rs10883841	0.285233	-2.04	-2.77391	16	4	lasso.as	0.5815	0.00018	1.80702	0.0708
analysis/predict/WEIGHTS//chr10:105532100-105532600.wgt.RDat	chr10:105532100-105532600	10	105532100	105532600		rs911543	1.252	rs7920154	0.036163	-1.273	0.4488	30	2	lasso	0.042	0.01	-1.35138	0.177
analysis/predict/WEIGHTS//chr10:105649800-105650300.wgt.RDat	chr10:105649800-105650300	10	105649800	105650300		rs2487999	4.015	rs4918069	0.076727	0.879	-1.25843	25	1	top1	0.049	0.0063	-1.25843	0.208
analysis/predict/WEIGHTS//chr10:106047850-106048700.wgt.RDat	chr10:106047850-106048700	10	106047850	106048700		rs11191979	2.345	rs1147611	-0.006971	-1.715	2.2857	15	7	lasso	0.075	0.00084	-0.5867	0.557
analysis/predict/WEIGHTS//chr10:106252000-106252550.wgt.RDat	chr10:106252000-106252550	10	106252000	106252550		rs280845	1.782	rs17762029	0.223469	-3.496	-1.13095	27	1	top1	0.223	0.01	1.13095	0.258
analysis/predict/WEIGHTS//chr10:10633850-10634400.wgt.RDat	chr10:10633850-10634400	10	10633850	10634400		rs11256681	-2.943	rs6602443	-0.065495	-2.509	-0.63529	43	1	top1.qtl	0.4229	0.0037	0.63529	0.525
analysis/predict/WEIGHTS//chr10:10652500-10652950.wgt.RDat	chr10:10652500-10652950	10	10652500	10652950		rs11256693	-2.072	rs10508408	0.228413	1.329	0.28916	36	1	top1.as	0.47278	0.0018	0.42424	0.671
analysis/predict/WEIGHTS//chr10:111409950-111410550.wgt.RDat	chr10:111409950-111410550	10	111409950	111410550		rs7904693	1.035	rs10787179	-0.014646	-1.485	0.75581	16	1	top1.as	0.4374	0.003	-0.91861	0.358
analysis/predict/WEIGHTS//chr10:111662600-111663050.wgt.RDat	chr10:111662600-111663050	10	111662600	111663050		rs3758409	1.863	rs12258440	-0.06903	-2.918	1.76842	15	1	top1.qtl	0.048	0.0068	-0.70238	0.482
analysis/predict/WEIGHTS//chr10:112389250-112389850.wgt.RDat	chr10:112389250-112389850	10	112389250	112389850		rs11195232	-2.121	rs2419564	0.04238	3.319	0.7093	20	1	top1.as	0.2403	0.00091	0.7093	0.478
analysis/predict/WEIGHTS//chr10:112543700-112544550.wgt.RDat	chr10:112543700-112544550	10	112543700	112544550		rs7068721	1.632	rs12414939	0.001361	-3	0.53086	37	1	top1	0.052	0.005	-0.53086	0.596
analysis/predict/WEIGHTS//chr10:112550650-112551300.wgt.RDat	chr10:112550650-112551300	10	112550650	112551300		rs11195342	2.034	rs17762956	0.217869	-1.769	0.44954	39	1	top1	0.2179	0.0083	-0.44954	0.653
analysis/predict/WEIGHTS//chr10:112583700-112584300.wgt.RDat	chr10:112583700-112584300	10	112583700	112584300		rs11195353	-2.685	rs7086886	0.005057	2.052	-0.02913	28	1	top1.as	0.1402	0.011	-0.12981	0.897
analysis/predict/WEIGHTS//chr10:112678300-112679300.wgt.RDat	chr10:112678300-112679300	10	112678300	112679300		rs7079511	-2.398	rs7895872	0.188505	-1.014	-2.1828	10	1	top1	0.1885	0.014	2.1828	0.0291
analysis/predict/WEIGHTS//chr10:113547450-113548100.wgt.RDat	chr10:113547450-113548100	10	113547450	113548100		rs10885262	1.095	rs1338006	0.23612	0.945	-0.34356	20	1	top1	0.2361	0.0021	-0.34356	0.731
analysis/predict/WEIGHTS//chr10:113685700-113686250.wgt.RDat	chr10:113685700-113686250	10	113685700	113686250		rs1974737	-1.055	rs10787420	-0.029089	0.796	-0.95833	21	1	top1.qtl	0.042	0.01	-0.42697	0.669
analysis/predict/WEIGHTS//chr10:114081700-114082300.wgt.RDat	chr10:114081700-114082300	10	114081700	114082300		rs10749114	1.847	rs11195887	0.641701	-3.904	-0.90541	30	1	top1	0.642	0.0014	0.9054	0.365
analysis/predict/WEIGHTS//chr10:114605850-114606450.wgt.RDat	chr10:114605850-114606450	10	114605850	114606450		rs2475177	-2.707	rs12358731	-0.023712	-2.208	-0.22093	27	1	top1.as	0.2556	0.0082	-0.15929	0.873
analysis/predict/WEIGHTS//chr10:115116800-115117500.wgt.RDat	chr10:115116800-115117500	10	115116800	115117500		rs569586	3.8	rs10885432	0.645293	-9.419	2.89655	39	1	top1.as	0.55	2.3e-24	-2.89655	0.00377
analysis/predict/WEIGHTS//chr10:115420450-115421050.wgt.RDat	chr10:115420450-115421050	10	115420450	115421050		rs1419098	-3.634	rs7906704	0.058695	3.638	1.32632	40	20	lasso.plasma	0.262	0.0062	2.32123	0.0203
analysis/predict/WEIGHTS//chr10:115525800-115526500.wgt.RDat	chr10:115525800-115526500	10	115525800	115526500		rs11196457	-4.007	rs10885501	0.251467	-6.569	2.10843	40	8	lasso.plasma	0.26	2.5e-10	-2.54448	0.0109
analysis/predict/WEIGHTS//chr10:115718450-115719650.wgt.RDat	chr10:115718450-115719650	10	115718450	115719650		rs151591	-1.894	rs180925	0.037276	1.363	-1.0303	24	1	top1.as	0.2479	0.013	-1.58947	0.112
analysis/predict/WEIGHTS//chr10:115966500-115967150.wgt.RDat	chr10:115966500-115967150	10	115966500	115967150		rs17091414	2.477	rs2616636	0.298208	-6.615	0.55422	17	4	lasso.plasma	0.24	1.5e-09	-0.84503	0.398
analysis/predict/WEIGHTS//chr10:115998650-115999400.wgt.RDat	chr10:115998650-115999400	10	115998650	115999400		rs639870	2.5	rs1978224	0.411846	4.657	-1.24324	24	1	top1	0.412	0.00023	-1.24324	0.214
analysis/predict/WEIGHTS//chr10:116004850-116005350.wgt.RDat	chr10:116004850-116005350	10	116004850	116005350		rs639870	2.5	rs11593345	-0.033638	2.623	-1.42708	23	3	lasso.plasma	0.073	0.001	-2.15503	0.0312
analysis/predict/WEIGHTS//chr10:116109200-116109850.wgt.RDat	chr10:116109200-116109850	10	116109200	116109850		rs493347	-1.293	rs4751649	-0.002588	1.301	-0.28235	22	1	top1	0.0663	0.0017	-0.28235	0.778
analysis/predict/WEIGHTS//chr10:116311000-116311550.wgt.RDat	chr10:116311000-116311550	10	116311000	116311550		rs2497714	-1.387	rs2497714	0.298097	-2.678	-1.3865	29	1	top1.qtl	0.3216	0.0084	-0.18519	0.853
analysis/predict/WEIGHTS//chr10:116617450-116618500.wgt.RDat	chr10:116617450-116618500	10	116617450	116618500		rs11196954	1.534	rs7923693	0.138008	1.128	-0.09639	16	1	top1.as	0.154	0.01	-0.53488	0.593
analysis/predict/WEIGHTS//chr10:117326200-117326850.wgt.RDat	chr10:117326200-117326850	10	117326200	117326850		rs2769407	-1.733	rs1572396	0.049447	-4.22	-1.26136	16	1	top1	0.091	0.00027	1.26136	0.207
analysis/predict/WEIGHTS//chr10:117339400-117339950.wgt.RDat	chr10:117339400-117339950	10	117339400	117339950		rs2769407	-1.733	rs2769407	-0.020928	-2.388	-1.7333	18	7	lasso	0.054	0.0042	1.75891	0.0786
analysis/predict/WEIGHTS//chr10:118043950-118044400.wgt.RDat	chr10:118043950-118044400	10	118043950	118044400		rs11197613	1.63	rs12767703	-0.082936	1.895	1.1191	25	11	lasso	0.056	0.0037	-1.01422	0.31
analysis/predict/WEIGHTS//chr10:118187100-118187650.wgt.RDat	chr10:118187100-118187650	10	118187100	118187650		rs17094717	-2.146	rs17094717	0.058284	2.321	-2.14607	21	1	top1.qtl	0.052	0.0049	0.02242	0.982
analysis/predict/WEIGHTS//chr10:118607800-118608350.wgt.RDat	chr10:118607800-118608350	10	118607800	118608350		rs17095303	-1.912	rs1681720	0.000613	2.076	0.19767	14	1	top1.qtl	0.0855	0.00039	1.912	0.0559
analysis/predict/WEIGHTS//chr10:11916350-11917000.wgt.RDat	chr10:11916350-11917000	10	11916350	11917000		rs11257367	2.349	rs10906026	-0.021431	1.269	0.02913	24	1	top1.as	0.2676	0.012	1.86047	0.0628
analysis/predict/WEIGHTS//chr10:120349800-120350300.wgt.RDat	chr10:120349800-120350300	10	120349800	120350300		rs2225915	-1.216	rs1766275	0.03277	-2.599	0.6875	34	1	top1.as	0.1614	0.0098	0.73196	0.464
analysis/predict/WEIGHTS//chr10:120485400-120486100.wgt.RDat	chr10:120485400-120486100	10	120485400	120486100		rs17586536	-1	rs4752194	-0.043449	-2.35	-0.11539	13	1	top1.qtl	0.055	0.0041	0.11538	0.908
analysis/predict/WEIGHTS//chr10:120523250-120523850.wgt.RDat	chr10:120523250-120523850	10	120523250	120523850		rs11818205	-2.277	rs4752198	0.013683	-3.383	0.8046	24	1	top1.as	0.0764	0.00078	-0.8046	0.421
analysis/predict/WEIGHTS//chr10:120528500-120529150.wgt.RDat	chr10:120528500-120529150	10	120528500	120529150		rs11818205	-2.277	rs10886299	0.386479	-5.852	0.02198	24	1	top1.qtl	0.17	5.5e-07	-0.02198	0.982
analysis/predict/WEIGHTS//chr10:12095450-12096000.wgt.RDat	chr10:12095450-12096000	10	12095450	12096000		rs7908725	1.5	rs10906052	0.062725	-1.37	-1	12	1	top1.as	0.3367	0.00019	-1.5	0.134
analysis/predict/WEIGHTS//chr10:121691400-121691800.wgt.RDat	chr10:121691400-121691800	10	121691400	121691800		rs7907207	1.112	rs7907207	0.384412	-2.801	1.11236	26	1	top1	0.384	0.014	-1.11236	0.266
analysis/predict/WEIGHTS//chr10:121952900-121953250.wgt.RDat	chr10:121952900-121953250	10	121952900	121953250		rs7093218	-2.421	rs10886624	0.344796	1.613	-0.54321	36	1	top1.as	0.5921	9.1e-05	-0.54321	0.587
analysis/predict/WEIGHTS//chr10:12209650-12210100.wgt.RDat	chr10:12209650-12210100	10	12209650	12210100		rs9633765	4.605	rs4589194	-0.021829	3.139	4.45679	21	1	top1.qtl	0.078	0.00069	3.1	0.00194
analysis/predict/WEIGHTS//chr10:12210450-12210900.wgt.RDat	chr10:12210450-12210900	10	12210450	12210900		rs9633765	4.605	rs12267387	0.116381	3.816	4.45679	22	10	lasso.as	0.075	0.00089	3.50529	0.000456
analysis/predict/WEIGHTS//chr10:122151850-122152800.wgt.RDat	chr10:122151850-122152800	10	122151850	122152800		rs10788079	-0.729	rs7914279	0.274191	3.884	-0.4145	26	3	lasso	0.2736	0.013	0.14654	0.883
analysis/predict/WEIGHTS//chr10:122677000-122677850.wgt.RDat	chr10:122677000-122677850	10	122677000	122677850		rs6585677	-3.6	rs7098240	0.096375	5.269	-3.3625	28	3	lasso.plasma	0.164	8.9e-07	-3.22852	0.00124
analysis/predict/WEIGHTS//chr10:122700250-122700800.wgt.RDat	chr10:122700250-122700800	10	122700250	122700800		rs6585677	-3.6	rs6585677	-0.004873	3.057	-3.6	30	5	lasso.plasma	0.07644	0.00078	-3.88607	0.000102
analysis/predict/WEIGHTS//chr10:122836100-122836800.wgt.RDat	chr10:122836100-122836800	10	122836100	122836800		rs11199747	1.991	rs11596249	-0.059138	-1.63	1.84286	22	1	top1.qtl	0.4572	0.0016	1.28182	0.2
analysis/predict/WEIGHTS//chr10:12289250-12289750.wgt.RDat	chr10:12289250-12289750	10	12289250	12289750		rs11257655	2.01	rs17566968	-0.014655	-1.421	-1.81905	19	1	top1.qtl	0.037	0.015	1.07759	0.281
analysis/predict/WEIGHTS//chr10:123348750-123349700.wgt.RDat	chr10:123348750-123349700	10	123348750	123349700		rs2420946	-4.395	rs7899765	0.01416	1.917	3.58182	25	1	top1.as	0.45521	0.0024	-1.4875	0.137
analysis/predict/WEIGHTS//chr10:123780900-123781550.wgt.RDat	chr10:123780900-123781550	10	123780900	123781550		rs7898269	-3.2	rs17631911	0.139257	2.425	0.88806	40	1	top1	0.1393	0.0029	0.88806	0.375
analysis/predict/WEIGHTS//chr10:123786050-123786700.wgt.RDat	chr10:123786050-123786700	10	123786050	123786700		rs7898269	-3.2	rs2461202	0.146829	1.961	-2.12687	41	1	top1.as	0.2998	0.014	-1.55263	0.121
analysis/predict/WEIGHTS//chr10:123822500-123823300.wgt.RDat	chr10:123822500-123823300	10	123822500	123823300		rs2461230	-2.436	rs12570464	0.054899	2.887	0.35542	33	1	top1.as	0.1617	0.011	-1.025	0.305
analysis/predict/WEIGHTS//chr10:123872100-123872650.wgt.RDat	chr10:123872100-123872650	10	123872100	123872650		rs2421002	-2.375	rs2420994	-0.028858	1.764	1.32955	42	1	top1	0.038	0.014	1.32955	0.184
analysis/predict/WEIGHTS//chr10:123880250-123881150.wgt.RDat	chr10:123880250-123881150	10	123880250	123881150		rs4752656	-3.398	rs11595073	-0.024322	2.178	-2.03061	43	1	top1.qtl	0.054	0.0043	-1.55556	0.12
analysis/predict/WEIGHTS//chr10:123902400-123903000.wgt.RDat	chr10:123902400-123903000	10	123902400	123903000		rs4752656	-3.398	rs7917144	-0.022609	3.158	-0.52532	41	1	top1.qtl	0.039	0.013	-0.60577	0.545
analysis/predict/WEIGHTS//chr10:123914450-123915300.wgt.RDat	chr10:123914450-123915300	10	123914450	123915300		rs4752656	-3.398	rs2420998	-0.030404	-2.525	-1.02247	29	9	lasso.as	0.6028	0.00019	-0.7547	0.45
analysis/predict/WEIGHTS//chr10:124624300-124624850.wgt.RDat	chr10:124624300-124624850	10	124624300	124624850		rs4638251	1.182	rs11595408	0.028353	-2.738	-0.77551	9	3	lasso.plasma	0.047	0.0071	1.18909	0.234
analysis/predict/WEIGHTS//chr10:124986800-124987800.wgt.RDat	chr10:124986800-124987800	10	124986800	124987800		rs17587182	1.725	rs766295	0.225261	3.808	1.10638	42	1	top1.as	0.304	0.00076	1.47475	0.14
analysis/predict/WEIGHTS//chr10:125823250-125823800.wgt.RDat	chr10:125823250-125823800	10	125823250	125823800		rs9422262	1.241	rs4366426	0.06078	-2.912	0.64894	10	2	lasso.plasma	0.1647	0.012	-0.64608	0.518
analysis/predict/WEIGHTS//chr10:126190100-126190500.wgt.RDat	chr10:126190100-126190500	10	126190100	126190500		rs2154395	-2.541	rs7070581	-0.078473	2.428	0.92857	39	1	top1.qtl	0.63458	0.0005	0.83607	0.403
analysis/predict/WEIGHTS//chr10:126248850-126249450.wgt.RDat	chr10:126248850-126249450	10	126248850	126249450		rs4962386	-3.432	rs10901761	0.270728	-1.199	-1.67045	54	1	top1	0.2707	0.0092	1.67045	0.0948
analysis/predict/WEIGHTS//chr10:126433250-126433700.wgt.RDat	chr10:126433250-126433700	10	126433250	126433700		rs11245344	3.827	rs2062387	-0.024294	1.079	2.57937	25	1	top1	0.07	0.0012	2.57937	0.0099
analysis/predict/WEIGHTS//chr10:126701800-126702200.wgt.RDat	chr10:126701800-126702200	10	126701800	126702200		rs12769019	6.685	rs12769019	0.025585	-2.884	6.6854	55	1	lasso	0.2232	0.013	-5.67033	1.43e-08
analysis/predict/WEIGHTS//chr10:127205250-127205500.wgt.RDat	chr10:127205250-127205500	10	127205250	127205500		rs11244519	-2.313	rs4962467	0.423236	-0.885	-1.59184	25	1	top1.as	0.507	0.0023	-0.91667	0.359
analysis/predict/WEIGHTS//chr10:127444600-127445250.wgt.RDat	chr10:127444600-127445250	10	127444600	127445250		rs10901423	-2.093	rs17153510	0.032999	-1.078	1.51656	13	1	top1.qtl	0.044	0.0088	-0.94737	0.343
analysis/predict/WEIGHTS//chr10:12762250-12763150.wgt.RDat	chr10:12762250-12763150	10	12762250	12763150		rs10906212	1.588	rs7901290	0.128726	2.643	0.31765	18	1	top1.qtl	0.1774	0.0045	0.12644	0.899
analysis/predict/WEIGHTS//chr10:127746750-127747150.wgt.RDat	chr10:127746750-127747150	10	127746750	127747150		rs985462	2.576	rs1710293	-0.023899	3.293	-1.64634	64	4	lasso.plasma	0.039	0.014	-2.1787	0.0294
analysis/predict/WEIGHTS//chr10:127748000-127748400.wgt.RDat	chr10:127748000-127748400	10	127748000	127748400		rs985462	2.576	rs985461	0.129629	4.243	-1.92771	62	1	top1.qtl	0.091	0.00025	-1.0241	0.306
analysis/predict/WEIGHTS//chr10:128247200-128248250.wgt.RDat	chr10:128247200-128248250	10	128247200	128248250		rs4531372	2.247	rs7916680	0.012089	-2.528	1.43089	40	1	top1.as	0.1651	0.00046	-1.72581	0.0844
analysis/predict/WEIGHTS//chr10:128323350-128323950.wgt.RDat	chr10:128323350-128323950	10	128323350	128323950		rs10901640	-1.716	rs2804443	0.037594	4.452	1.30682	34	1	top1	0.146	3.6e-06	1.30682	0.191
analysis/predict/WEIGHTS//chr10:130598650-130599050.wgt.RDat	chr10:130598650-130599050	10	130598650	130599050		rs4751007	1.817	rs1327014	-0.034313	-1.157	-0.18447	22	1	top1	0.059	0.003	0.18447	0.854
analysis/predict/WEIGHTS//chr10:130664450-130664850.wgt.RDat	chr10:130664450-130664850	10	130664450	130664850		rs12572126	-2.662	rs12572126	0.481365	-4.3	-2.66165	24	1	top1	0.481	0.00019	2.66165	0.00778
analysis/predict/WEIGHTS//chr10:132897200-132897950.wgt.RDat	chr10:132897200-132897950	10	132897200	132897950		rs1891780	2.329	rs4751321	0.29733	-5.718	-0.0404	33	11	lasso.plasma	0.19	9.1e-08	-0.93062	0.352
analysis/predict/WEIGHTS//chr10:133861700-133862300.wgt.RDat	chr10:133861700-133862300	10	133861700	133862300		rs7897589	2.543	rs2026122	0.014862	-2.925	-0.5109	40	11	lasso	0.1061	0.013	0.36914	0.712
analysis/predict/WEIGHTS//chr10:134330600-134331100.wgt.RDat	chr10:134330600-134331100	10	134330600	134331100		rs10747068	2.548	rs5025116	-0.046626	1.938	-1.66667	19	1	top1	0.037	0.015	-1.66667	0.0956
analysis/predict/WEIGHTS//chr10:1366950-1367500.wgt.RDat	chr10:1366950-1367500	10	1366950	1367500		rs4880820	-0.837	rs4880824	0.341907	7.552	0.2619	23	1	top1.qtl	0.33	3.4e-13	0.2619	0.793
analysis/predict/WEIGHTS//chr10:13750600-13751150.wgt.RDat	chr10:13750600-13751150	10	13750600	13751150		rs943099	2.494	rs3750885	0.000912	-3.321	0.61165	41	1	top1.as	0.2455	0.0082	-1.0297	0.303
analysis/predict/WEIGHTS//chr10:13759400-13760450.wgt.RDat	chr10:13759400-13760450	10	13759400	13760450		rs7918053	3.088	rs737376	0.131535	-1.993	-0.03659	41	1	top1	0.1315	0.0071	0.03659	0.971
analysis/predict/WEIGHTS//chr10:13858500-13859100.wgt.RDat	chr10:13858500-13859100	10	13858500	13859100		rs7894550	2.552	rs12763450	0.125321	-2.05	-1.45324	49	1	top1.as	0.299	0.00059	1.90426	0.0569
analysis/predict/WEIGHTS//chr10:13949450-13949950.wgt.RDat	chr10:13949450-13949950	10	13949450	13949950		rs1406469	-2.339	rs4750436	0.399647	-1.167	-2.07229	33	1	top1	0.4	0.0038	2.07229	0.0382
analysis/predict/WEIGHTS//chr10:14032300-14034050.wgt.RDat	chr10:14032300-14034050	10	14032300	14034050		rs2446597	-1.197	rs6602695	0.030871	-2.161	-0.64828	35	1	top1.as	0.1128	0.013	0.03448	0.972
analysis/predict/WEIGHTS//chr10:14099000-14099450.wgt.RDat	chr10:14099000-14099450	10	14099000	14099450		rs11258848	-1.206	rs11258848	-0.016294	4.556	-1.20588	37	1	top1.qtl	0.132	1.1e-05	0.67816	0.498
analysis/predict/WEIGHTS//chr10:14210950-14211500.wgt.RDat	chr10:14210950-14211500	10	14210950	14211500		rs12765358	1.811	rs11591292	0.020057	1.108	1.04734	22	1	top1	0.053	0.0045	1.04734	0.295
analysis/predict/WEIGHTS//chr10:14555000-14555500.wgt.RDat	chr10:14555000-14555500	10	14555000	14555500		rs7897612	3.065	rs11259159	0.359014	0.741	1.64706	21	1	top1.as	0.5019	0.0037	0.31707	0.751
analysis/predict/WEIGHTS//chr10:14587750-14588400.wgt.RDat	chr10:14587750-14588400	10	14587750	14588400		rs12778144	2.471	rs3780915	-0.024645	1.716	0.82203	38	10	lasso.as	0.056	0.0037	0.44779	0.654
analysis/predict/WEIGHTS//chr10:14734400-14734850.wgt.RDat	chr10:14734400-14734850	10	14734400	14734850		rs4750545	1.589	rs7096784	0.06587	1.733	1.23256	46	1	top1.as	0.13658	0.0062	1.23256	0.218
analysis/predict/WEIGHTS//chr10:15126400-15126950.wgt.RDat	chr10:15126400-15126950	10	15126400	15126950		rs17156272	2.328	rs7900561	-0.004549	1.945	-0.69725	22	1	top1.as	0.4542	0.0017	-2.32768	0.0199
analysis/predict/WEIGHTS//chr10:16201550-16202150.wgt.RDat	chr10:16201550-16202150	10	16201550	16202150		rs2483506	-1.957	rs11253827	-0.023611	2.884	-0.04211	14	4	lasso.plasma	0.078	0.00069	-1.43834	0.15
analysis/predict/WEIGHTS//chr10:16241700-16242400.wgt.RDat	chr10:16241700-16242400	10	16241700	16242400		rs1340141	-2.028	rs4748263	-0.051623	2.812	0.6957	11	3	lasso	0.085	0.00041	0.06996	0.944
analysis/predict/WEIGHTS//chr10:16342600-16343150.wgt.RDat	chr10:16342600-16343150	10	16342600	16343150		rs10904707	-1.987	rs10795376	0.207092	3.034	-0.7094	27	1	top1	0.20709	0.015	-0.7094	0.478
analysis/predict/WEIGHTS//chr10:16585950-16586700.wgt.RDat	chr10:16585950-16586700	10	16585950	16586700		rs11254059	-2.082	rs12412368	0.291986	-2.871	0.73809	25	1	top1.as	0.05396	0.0043	-0.7381	0.46
analysis/predict/WEIGHTS//chr10:17038150-17038700.wgt.RDat	chr10:17038150-17038700	10	17038150	17038700		rs12414709	-1.902	rs7900486	-0.055798	2.471	-1.69697	38	1	top1.as	0.3559	0.011	-0.77358	0.439
analysis/predict/WEIGHTS//chr10:17326500-17327000.wgt.RDat	chr10:17326500-17327000	10	17326500	17327000		rs359280	1.667	rs359288	0.194144	-4.464	1.0241	29	1	top1	0.071	0.0011	-1.0241	0.306
analysis/predict/WEIGHTS//chr10:17666850-17667500.wgt.RDat	chr10:17666850-17667500	10	17666850	17667500		rs1937348	-0.654	rs2357287	0.348145	-2.692	0.35714	16	1	top1.as	0.5525	0.0012	-0.35714	0.721
analysis/predict/WEIGHTS//chr10:18269550-18270050.wgt.RDat	chr10:18269550-18270050	10	18269550	18270050		rs11594776	-1.827	rs1926739	0.098409	-5.01	0.8025	36	11	lasso	0.204	3.1e-08	0.21492	0.83
analysis/predict/WEIGHTS//chr10:18940400-18940850.wgt.RDat	chr10:18940400-18940850	10	18940400	18940850		rs1971272	3.009	rs7098313	0.586418	-0.963	0.91667	23	1	top1	0.5864	0.0011	-0.91667	0.359
analysis/predict/WEIGHTS//chr10:19641050-19641850.wgt.RDat	chr10:19641050-19641850	10	19641050	19641850		rs1577302	1.286	rs1591342	0.214334	-1.269	1.08271	20	1	top1	0.214	0.0039	-1.08271	0.279
analysis/predict/WEIGHTS//chr10:21167150-21167950.wgt.RDat	chr10:21167150-21167950	10	21167150	21167950		rs12777530	-2.092	rs788957	-0.024635	2.579	0.66	25	1	top1.as	0.1571	0.0073	0.9527	0.341
analysis/predict/WEIGHTS//chr10:21190550-21191100.wgt.RDat	chr10:21190550-21191100	10	21190550	21191100		rs16921240	1.522	rs788985	0.132219	-5.396	0.66443	26	1	top1	0.13	1.6e-05	-0.66443	0.506
analysis/predict/WEIGHTS//chr10:21455650-21456400.wgt.RDat	chr10:21455650-21456400	10	21455650	21456400		rs7099403	-2.37	rs11012566	-0.023612	1.936	-0.01667	17	1	top1.qtl	0.038	0.015	-0.01667	0.987
analysis/predict/WEIGHTS//chr10:2390600-2391050.wgt.RDat	chr10:2390600-2391050	10	2390600	2391050		rs1540996	-2	rs7076264	0.378059	3.69	-0.7284	42	7	lasso.plasma	0.579	0.0034	-1.53686	0.124
analysis/predict/WEIGHTS//chr10:24116650-24117450.wgt.RDat	chr10:24116650-24117450	10	24116650	24117450		rs11013728	0.624	rs2366591	0.039043	2.2	0.5	14	1	top1.qtl	0.2855	0.011	0.5	0.617
analysis/predict/WEIGHTS//chr10:24447350-24447800.wgt.RDat	chr10:24447350-24447800	10	24447350	24447800		rs1326641	-1.667	rs1326638	0.641032	4.054	0.03158	16	1	top1	0.641	0.00078	0.03158	0.975
analysis/predict/WEIGHTS//chr10:24540500-24541050.wgt.RDat	chr10:24540500-24541050	10	24540500	24541050		rs1543739	3.114	rs7923307	-0.004752	-2.861	-1.78641	25	1	top1	0.0411	0.011	1.78641	0.074
analysis/predict/WEIGHTS//chr10:24553200-24553700.wgt.RDat	chr10:24553200-24553700	10	24553200	24553700		rs1543739	3.114	rs16924466	0.187886	3.086	-1.14573	26	1	top1	0.188	0.014	-1.14573	0.252
analysis/predict/WEIGHTS//chr10:27023050-27023650.wgt.RDat	chr10:27023050-27023650	10	27023050	27023650		rs1998633	1.758	rs12220461	0.021059	2.306	1.40397	21	8	lasso.plasma	0.055	0.004	1.35278	0.176
analysis/predict/WEIGHTS//chr10:27978750-27979050.wgt.RDat	chr10:27978750-27979050	10	27978750	27979050		rs2815560	-2.853	rs5024546	0.605305	-1.912	-1.45385	34	1	top1	0.6053	6.8e-05	1.45385	0.146
analysis/predict/WEIGHTS//chr10:27988600-27989150.wgt.RDat	chr10:27988600-27989150	10	27988600	27989150		rs2815560	-2.853	rs2815564	-0.032864	-2.384	-2.48	27	1	top1.as	0.041	0.011	-0.68182	0.495
analysis/predict/WEIGHTS//chr10:28197150-28197650.wgt.RDat	chr10:28197150-28197650	10	28197150	28197650		rs2368274	-3.299	rs7897553	-0.010876	4.302	0.425	11	1	top1	0.176	3.4e-07	0.425	0.671
analysis/predict/WEIGHTS//chr10:28227750-28228500.wgt.RDat	chr10:28227750-28228500	10	28227750	28228500		rs2297646	-2.5	rs2368268	-0.022367	-2.552	0.25	15	1	top1.qtl	0.1694	0.0036	-0.25	0.803
analysis/predict/WEIGHTS//chr10:28664600-28664950.wgt.RDat	chr10:28664600-28664950	10	28664600	28664950		rs734210	2.138	rs11007074	0.372931	2.094	0.63462	24	1	top1.qtl	0.1	0.00013	1.01342	0.311
analysis/predict/WEIGHTS//chr10:28746000-28746500.wgt.RDat	chr10:28746000-28746500	10	28746000	28746500		rs12240339	-2.204	rs7085106	0.283962	-3.375	-1.5204	23	2	lasso	0.318	0.011	1.39081	0.164
analysis/predict/WEIGHTS//chr10:29339500-29340200.wgt.RDat	chr10:29339500-29340200	10	29339500	29340200		rs2783425	-2.683	rs11007392	0.013514	-2.378	-1.69277	50	1	top1.qtl	0.047	0.007	0.97895	0.328
analysis/predict/WEIGHTS//chr10:29565250-29566050.wgt.RDat	chr10:29565250-29566050	10	29565250	29566050		rs1751956	2.248	rs10826593	0.063865	-1.525	-1.14634	58	1	top1.as	0.1833	0.0068	1.14634	0.252
analysis/predict/WEIGHTS//chr10:29810800-29811200.wgt.RDat	chr10:29810800-29811200	10	29810800	29811200		rs913035	-2.163	rs2025853	-0.018813	3.117	1.47126	19	1	top1	0.063	0.0021	1.47126	0.141
analysis/predict/WEIGHTS//chr10:29918900-29919800.wgt.RDat	chr10:29918900-29919800	10	29918900	29919800		rs2505910	-1.775	rs1536696	0.008247	3.294	1	30	8	lasso.plasma	0.042	0.011	1.71607	0.0862
analysis/predict/WEIGHTS//chr10:29932650-29933200.wgt.RDat	chr10:29932650-29933200	10	29932650	29933200		rs2505910	-1.775	rs2488690	0.429746	6.979	0.19277	23	1	top1	0.29	2.1e-11	0.19277	0.847
analysis/predict/WEIGHTS//chr10:30235650-30236250.wgt.RDat	chr10:30235650-30236250	10	30235650	30236250		rs10826733	3.12	rs2767625	0.045237	3.226	-1.17073	40	1	top1.as	0.344	0.00031	-1.22222	0.222
analysis/predict/WEIGHTS//chr10:30531150-30531850.wgt.RDat	chr10:30531150-30531850	10	30531150	30531850		rs2995271	-0.869	rs2995278	0.276871	3.76	-0.7619	12	1	lasso	0.332	0.0024	-0.76191	0.446
analysis/predict/WEIGHTS//chr10:31093350-31094150.wgt.RDat	chr10:31093350-31094150	10	31093350	31094150		rs10763841	2.237	rs7916670	-0.021535	-1.322	0.1165	23	1	top1.as	0.1393	0.0057	-0.11651	0.907
analysis/predict/WEIGHTS//chr10:3137550-3138150.wgt.RDat	chr10:3137550-3138150	10	3137550	3138150		rs7916889	3.742	rs4881086	-0.099813	2.933	2.42424	58	1	top1.qtl	0.045	0.0081	2.42424	0.0153
analysis/predict/WEIGHTS//chr10:32250100-32250700.wgt.RDat	chr10:32250100-32250700	10	32250100	32250700		rs1775725	3.301	rs7895021	0.094881	4.316	-1.53125	10	1	top1	0.127	1.7e-05	-1.53125	0.126
analysis/predict/WEIGHTS//chr10:32325750-32326400.wgt.RDat	chr10:32325750-32326400	10	32325750	32326400		rs1639134	2.989	rs1639134	0.057178	1.974	2.98889	12	1	top1.qtl	0.045	0.0083	2.98889	0.0028
analysis/predict/WEIGHTS//chr10:32394600-32395350.wgt.RDat	chr10:32394600-32395350	10	32394600	32395350		rs2887830	-3.402	rs11008779	0.002654	-3.013	1.08511	29	1	top1.qtl	0.04	0.012	1.04819	0.295
analysis/predict/WEIGHTS//chr10:32620450-32620900.wgt.RDat	chr10:32620450-32620900	10	32620450	32620900		rs11599044	-1.692	rs11008889	-0.090741	-1.58	0.8462	14	2	lasso	0.4359	0.011	-1.62044	0.105
analysis/predict/WEIGHTS//chr10:33444800-33445550.wgt.RDat	chr10:33444800-33445550	10	33444800	33445550		rs11009254	-2.8	rs2750047	-0.018872	2.994	1.82022	43	1	top1.qtl	0.045	0.0086	1.54545	0.122
analysis/predict/WEIGHTS//chr10:33482350-33483650.wgt.RDat	chr10:33482350-33483650	10	33482350	33483650		rs7912484	-2.635	rs11009281	-0.001663	2.52	-0.18978	51	1	top1.qtl	0.09	0.00027	-0.18978	0.849
analysis/predict/WEIGHTS//chr10:33797900-33798750.wgt.RDat	chr10:33797900-33798750	10	33797900	33798750		rs11592507	2.06	rs2785250	0.199085	-2.997	-0.68702	38	1	top1	0.1991	0.0054	0.68702	0.492
analysis/predict/WEIGHTS//chr10:34441250-34442000.wgt.RDat	chr10:34441250-34442000	10	34441250	34442000		rs1972897	1.867	rs6481891	0.043864	-3.287	-0.32609	39	1	top1.as	0.046	0.0076	0.32609	0.744
analysis/predict/WEIGHTS//chr10:34806900-34807450.wgt.RDat	chr10:34806900-34807450	10	34806900	34807450		rs7086954	0.892	rs7086954	0.079363	-1.973	0.89157	11	1	top1.as	0.108	7.3e-05	0.71204	0.476
analysis/predict/WEIGHTS//chr10:34914850-34915650.wgt.RDat	chr10:34914850-34915650	10	34914850	34915650		rs2496720	1.722	rs10827385	-0.023181	2.577	0.53658	16	1	top1	0.043	0.0098	0.53658	0.592
analysis/predict/WEIGHTS//chr10:3528600-3529000.wgt.RDat	chr10:3528600-3529000	10	3528600	3529000		rs1543836	2.661	rs10904048	-0.016286	-1.341	0.35714	26	1	top1.as	0.0542	0.0042	-1.92222	0.0546
analysis/predict/WEIGHTS//chr10:3580600-3581000.wgt.RDat	chr10:3580600-3581000	10	3580600	3581000		rs10904053	2.988	rs7914587	0.023306	-1.295	0.5	27	1	top1.qtl	0.072	0.0011	-2.07143	0.0383
analysis/predict/WEIGHTS//chr10:36344700-36345250.wgt.RDat	chr10:36344700-36345250	10	36344700	36345250		rs7073673	-1.275	rs3904597	0.314959	-5.037	-0.32584	30	1	top1	0.15	2.1e-06	0.32584	0.745
analysis/predict/WEIGHTS//chr10:36454850-36455350.wgt.RDat	chr10:36454850-36455350	10	36454850	36455350		rs315626	-0.968	rs315632	0.331791	1.732	-0.2069	27	1	top1.as	0.053	0.0045	-0.32692	0.744
analysis/predict/WEIGHTS//chr10:3825900-3826650.wgt.RDat	chr10:3825900-3826650	10	3825900	3826650		rs12773202	2.043	rs7093488	0.149843	-3.933	-1.50538	43	1	top1.as	0.057	0.0034	1.44318	0.149
analysis/predict/WEIGHTS//chr10:38265250-38265800.wgt.RDat	chr10:38265250-38265800	10	38265250	38265800		rs2749592	-1.022	rs2749592	-0.097571	-2.002	-1.02247	10	1	top1.qtl	0.038	0.014	1.02247	0.307
analysis/predict/WEIGHTS//chr10:38382950-38383400.wgt.RDat	chr10:38382950-38383400	10	38382950	38383400		rs2505192	-1.412	rs2505192	-0.02936	-2.337	-1.41176	13	1	top1.qtl	0.055	0.0038	0.83951	0.401
analysis/predict/WEIGHTS//chr10:3895700-3896300.wgt.RDat	chr10:3895700-3896300	10	3895700	3896300		rs10904103	1.608	rs4881226	0.107118	-1.751	-0.51163	28	1	top1.as	0.1554	0.0033	0.08182	0.935
analysis/predict/WEIGHTS//chr10:4103550-4104100.wgt.RDat	chr10:4103550-4104100	10	4103550	4104100		rs2645210	2.624	rs2251005	-0.076919	2.5	2.34188	20	1	top1	0.038	0.014	2.34188	0.0192
analysis/predict/WEIGHTS//chr10:42539000-42540000.wgt.RDat	chr10:42539000-42540000	10	42539000	42540000		rs9663774	-0.235	rs9663774	0.18325	4.06	-0.23529	2	1	top1.qtl	0.073	0.001	-0.23529	0.814
analysis/predict/WEIGHTS//chr10:4322600-4323550.wgt.RDat	chr10:4322600-4323550	10	4322600	4323550		rs11252451	2.012	rs7097420	0.037853	3.324	0.88889	23	1	top1.as	0.045	0.0084	0	1
analysis/predict/WEIGHTS//chr10:43950900-43951450.wgt.RDat	chr10:43950900-43951450	10	43950900	43951450		rs2261637	1.115	rs12359825	0.057483	2.906	-0.0283	9	1	top1	0.045	0.0085	-0.0283	0.977
analysis/predict/WEIGHTS//chr10:44976300-44976800.wgt.RDat	chr10:44976300-44976800	10	44976300	44976800		rs6593417	2.108	rs10900040	0.012472	3.021	-1.12621	28	5	lasso.plasma	0.105	8.9e-05	-1.5573	0.119
analysis/predict/WEIGHTS//chr10:45057900-45058350.wgt.RDat	chr10:45057900-45058350	10	45057900	45058350		rs7072122	1.851	rs7076575	-0.01045	1.295	0.875	33	1	top1	0.071	0.0012	0.875	0.382
analysis/predict/WEIGHTS//chr10:45131950-45132700.wgt.RDat	chr10:45131950-45132700	10	45131950	45132700		rs7922897	-1.742	rs17156718	0.161881	-2.329	0.176	20	1	top1.qtl	0.333	0.0072	-0.24	0.81
analysis/predict/WEIGHTS//chr10:45152300-45152950.wgt.RDat	chr10:45152300-45152950	10	45152300	45152950		rs7922897	-1.742	rs2170227	0.262254	3.187	-0.25	12	1	top1.as	0.05	0.0056	-0.25	0.803
analysis/predict/WEIGHTS//chr10:45192350-45193250.wgt.RDat	chr10:45192350-45193250	10	45192350	45193250		rs7097670	-1.058	rs7097670	-0.033685	-0.912	-1.05825	16	1	top1	0.093	0.00022	1.05825	0.29
analysis/predict/WEIGHTS//chr10:4720200-4720700.wgt.RDat	chr10:4720200-4720700	10	4720200	4720700		rs10904319	-3.3	rs10904313	-0.045788	1.708	0.4	21	1	top1	0.039	0.013	0.4	0.689
analysis/predict/WEIGHTS//chr10:47675250-47675700.wgt.RDat	chr10:47675250-47675700	10	47675250	47675700		rs7092598	3.841	rs10906946	-0.013538	3.241	-3.11828	18	1	top1.qtl	0.0636	0.0021	-1.72165	0.0851
analysis/predict/WEIGHTS//chr10:48548600-48549100.wgt.RDat	chr10:48548600-48549100	10	48548600	48549100		rs11204264	-2.16	rs4406765	0.344177	-5.49	0.91765	24	1	top1	0.14	4.2e-06	-0.91765	0.359
analysis/predict/WEIGHTS//chr10:4989850-4990350.wgt.RDat	chr10:4989850-4990350	10	4989850	4990350		rs2904800	1.819	rs11252840	-0.010445	2.544	-1.40458	20	7	lasso.as	0.05	0.0057	-1.69458	0.0902
analysis/predict/WEIGHTS//chr10:50712450-50713600.wgt.RDat	chr10:50712450-50713600	10	50712450	50713600		rs4253126	-1.838	rs2228528	0.183666	3.353	-0.59633	19	4	lasso.as	0.052	0.005	1.01299	0.311
analysis/predict/WEIGHTS//chr10:51514550-51514950.wgt.RDat	chr10:51514550-51514950	10	51514550	51514950		rs10825652	22.051	rs2843557	0.157727	-0.826	-5.95982	15	1	top1.as	0.265	0.0071	6.40252	1.53e-10
analysis/predict/WEIGHTS//chr10:51549100-51549700.wgt.RDat	chr10:51549100-51549700	10	51549100	51549700		rs10993994	25.938	rs10993994	0.29076	4.676	25.9375	24	1	top1.as	0.11	8e-05	25.9375	2.52e-148
analysis/predict/WEIGHTS//chr10:52086500-52087000.wgt.RDat	chr10:52086500-52087000	10	52086500	52087000		rs14327	1.075	rs12358176	0.147426	-4.272	-0.17582	25	11	lasso.plasma	0.078	0.00069	0.90712	0.364
analysis/predict/WEIGHTS//chr10:52133450-52134050.wgt.RDat	chr10:52133450-52134050	10	52133450	52134050		rs12360058	2.7	rs2060560	0.153481	-5.263	-0.42683	26	13	lasso.plasma	0.29	2.1e-11	1.91917	0.055
analysis/predict/WEIGHTS//chr10:52384300-52384650.wgt.RDat	chr10:52384300-52384650	10	52384300	52384650		rs17581567	-2.02	rs17581623	0.118312	0.986	1.34783	25	1	top1	0.1183	0.0097	1.34783	0.178
analysis/predict/WEIGHTS//chr10:53480100-53480650.wgt.RDat	chr10:53480100-53480650	10	53480100	53480650		rs10999171	-2.724	rs10999171	0.078559	4.014	-2.72414	28	1	top1	0.083	0.00048	-2.72414	0.00645
analysis/predict/WEIGHTS//chr10:5431250-5431850.wgt.RDat	chr10:5431250-5431850	10	5431250	5431850		rs7477292	-1.549	rs6422396	0.182541	-4.043	-0.3929	24	6	lasso	0.079	0.00066	0.47036	0.638
analysis/predict/WEIGHTS//chr10:55036450-55037150.wgt.RDat	chr10:55036450-55037150	10	55036450	55037150		rs4935411	-1.023	rs10740544	-0.007275	-2.202	0.95882	20	5	lasso.as	0.039	0.013	-1.38187	0.167
analysis/predict/WEIGHTS//chr10:5555200-5555700.wgt.RDat	chr10:5555200-5555700	10	5555200	5555700		rs6601975	-2.225	rs1142825	-0.058788	-1.907	1.24211	35	1	top1.as	0.341	0.0065	-0.3125	0.755
analysis/predict/WEIGHTS//chr10:55646350-55646950.wgt.RDat	chr10:55646350-55646950	10	55646350	55646950		rs2593105	-1.271	rs7088140	0.182705	3.232	-1.04878	25	1	top1.as	0.431	0.012	-1.25882	0.208
analysis/predict/WEIGHTS//chr10:5688450-5689050.wgt.RDat	chr10:5688450-5689050	10	5688450	5689050		rs4469789	-4.711	rs2892074	0.022686	3.304	1.59341	42	1	top1	0.043	0.01	1.59341	0.111
analysis/predict/WEIGHTS//chr10:5786650-5787350.wgt.RDat	chr10:5786650-5787350	10	5786650	5787350		rs2797496	3.204	rs10795541	0.128404	-3.634	1.67901	23	1	top1	0.081	0.00053	-1.67901	0.0932
analysis/predict/WEIGHTS//chr10:58105800-58106350.wgt.RDat	chr10:58105800-58106350	10	58105800	58106350		rs4144609	2.085	rs10825784	-0.018869	-4.055	0.82759	22	1	top1.qtl	0.111	5.6e-05	-0.82759	0.408
analysis/predict/WEIGHTS//chr10:5939400-5940100.wgt.RDat	chr10:5939400-5940100	10	5939400	5940100		rs6602312	-2.413	rs1512694	0.036728	1.361	-2.3625	41	1	top1.as	0.203	0.011	2.28049	0.0226
analysis/predict/WEIGHTS//chr10:5992150-5992850.wgt.RDat	chr10:5992150-5992850	10	5992150	5992850		rs2296139	-2.45	rs1998521	0.082204	-3.146	0.54878	37	1	top1.as	0.0552	0.0039	-0.82353	0.41
analysis/predict/WEIGHTS//chr10:60758800-60759650.wgt.RDat	chr10:60758800-60759650	10	60758800	60759650		rs282661	-1.042	rs10763596	0.084008	-0.912	-0.22881	13	1	top1.qtl	0.057	0.0034	-0.28	0.779
analysis/predict/WEIGHTS//chr10:61032400-61033000.wgt.RDat	chr10:61032400-61033000	10	61032400	61033000		rs11819163	-0.11	rs2452500	0.053265	1.592	-0.03101	9	1	top1.as	0.2514	0.012	-0.02521	0.98
analysis/predict/WEIGHTS//chr10:61216350-61216850.wgt.RDat	chr10:61216350-61216850	10	61216350	61216850		rs11006494	0.75	rs11006504	0.238851	-1.088	-0.4031	17	5	lasso	0.4367	0.0081	-0.08284	0.934
analysis/predict/WEIGHTS//chr10:61338000-61338600.wgt.RDat	chr10:61338000-61338600	10	61338000	61338600		rs12264752	1.574	rs4341489	0.063312	-3.526	-0.96154	30	1	top1	0.053	0.0045	0.96154	0.336
analysis/predict/WEIGHTS//chr10:61448500-61449250.wgt.RDat	chr10:61448500-61449250	10	61448500	61449250		rs1171659	1.82	rs1171648	0.126258	-3.625	1.36559	27	1	top1.as	0.153	0.014	-1.33333	0.182
analysis/predict/WEIGHTS//chr10:6152250-6152800.wgt.RDat	chr10:6152250-6152800	10	6152250	6152800		rs1571026	-1.615	rs10905806	-0.053059	2.533	0.89157	26	1	top1.qtl	0.069	0.0014	0.80247	0.422
analysis/predict/WEIGHTS//chr10:62042450-62043150.wgt.RDat	chr10:62042450-62043150	10	62042450	62043150		rs922116	-1.806	rs10740018	0.206948	3.646	0.90244	22	1	top1	0.207	0.00078	0.90244	0.367
analysis/predict/WEIGHTS//chr10:6205550-6206100.wgt.RDat	chr10:6205550-6206100	10	6205550	6206100		rs17151529	1.6	rs12359393	-0.020338	-3.358	1.36364	39	1	top1	0.041	0.012	-1.36364	0.173
analysis/predict/WEIGHTS//chr10:6233900-6234500.wgt.RDat	chr10:6233900-6234500	10	6233900	6234500		rs2516618	2.817	rs604589	0.418721	-4.628	0.79121	49	4	lasso.plasma	0.085	0.00042	-0.65402	0.513
analysis/predict/WEIGHTS//chr10:62835350-62835950.wgt.RDat	chr10:62835350-62835950	10	62835350	62835950		rs16915839	-1.257	rs7087951	0.105011	-4.957	0.22222	8	1	top1.qtl	0.17	6.1e-07	-0.22222	0.824
analysis/predict/WEIGHTS//chr10:63043700-63044300.wgt.RDat	chr10:63043700-63044300	10	63043700	63044300		rs4643025	-1.531	rs4145320	0.109273	1.605	-0.51807	20	1	top1.qtl	0.043	0.0097	-0.2439	0.807
analysis/predict/WEIGHTS//chr10:63217700-63218200.wgt.RDat	chr10:63217700-63218200	10	63217700	63218200		rs1915440	-1.138	rs7923758	-0.045187	-3.769	-0.9633	13	1	top1.qtl	0.12	2.8e-05	0.9633	0.335
analysis/predict/WEIGHTS//chr10:63223150-63223750.wgt.RDat	chr10:63223150-63223750	10	63223150	63223750		rs7923758	-0.963	rs12243268	-0.063624	2.235	-0.65421	15	1	top1.qtl	0.046	0.0081	-0.65421	0.513
analysis/predict/WEIGHTS//chr10:63588550-63589050.wgt.RDat	chr10:63588550-63589050	10	63588550	63589050		rs12266520	2.307	rs2588941	-0.03441	2.972	1.44444	35	3	lasso.plasma	0.147	3.3e-06	1.34514	0.179
analysis/predict/WEIGHTS//chr10:63696900-63698000.wgt.RDat	chr10:63696900-63698000	10	63696900	63698000		rs7068223	-1.839	rs4948491	0.037801	-1.441	1.54444	16	1	top1.as	0.1737	0.0049	-1.54444	0.122
analysis/predict/WEIGHTS//chr10:63778000-63778900.wgt.RDat	chr10:63778000-63778900	10	63778000	63778900		rs41344548	2.39	rs2278308	0.065785	4.525	1.16471	11	8	lasso.plasma	0.138	6.7e-06	0.64355	0.52
analysis/predict/WEIGHTS//chr10:65423950-65424700.wgt.RDat	chr10:65423950-65424700	10	65423950	65424700		rs7909797	-1.42	rs10761792	-0.043158	1.58	0.71951	17	1	top1.qtl	0.236	0.0094	0.45192	0.651
analysis/predict/WEIGHTS//chr10:65463150-65463900.wgt.RDat	chr10:65463150-65463900	10	65463150	65463900		rs4745810	1.068	rs10761792	0.038855	2.765	0.71951	16	1	top1.as	0.038	0.014	0.55556	0.579
analysis/predict/WEIGHTS//chr10:66659050-66659550.wgt.RDat	chr10:66659050-66659550	10	66659050	66659550		rs2932854	2.809	rs10822361	-0.031529	1.533	-1.47287	15	12	lasso.as	0.563	0.0041	-2.06153	0.0393
analysis/predict/WEIGHTS//chr10:66793000-66793400.wgt.RDat	chr10:66793000-66793400	10	66793000	66793400		rs10822424	2.656	rs10822403	-0.009275	-3.324	-1.55294	14	1	top1	0.098	0.00015	1.55294	0.12
analysis/predict/WEIGHTS//chr10:67094950-67095650.wgt.RDat	chr10:67094950-67095650	10	67094950	67095650		rs7070253	-2.404	rs4746505	-0.004434	2.939	-1.17284	27	1	top1	0.061	0.0025	-1.17284	0.241
analysis/predict/WEIGHTS//chr10:68739600-68740300.wgt.RDat	chr10:68739600-68740300	10	68739600	68740300		rs2140369	2.756	rs10997457	0.162905	4.505	-0.8785	33	4	lasso.plasma	0.066	0.0017	-0.77379	0.439
analysis/predict/WEIGHTS//chr10:69597600-69598150.wgt.RDat	chr10:69597600-69598150	10	69597600	69598150		rs16924888	-1.727	rs2273771	-0.014479	0.944	-0.03247	8	1	top1.qtl	0.041	0.011	1.15294	0.249
analysis/predict/WEIGHTS//chr10:69807300-69807850.wgt.RDat	chr10:69807300-69807850	10	69807300	69807850		rs560523	-1.56	rs503677	0.103964	-5.614	-1.55294	18	1	top1.qtl	0.27	1.4e-10	1.55294	0.12
analysis/predict/WEIGHTS//chr10:70480550-70481150.wgt.RDat	chr10:70480550-70481150	10	70480550	70481150		rs1782322	-2.024	rs1782328	0.467409	1.026	0.8	17	1	top1.as	0.544	0.0033	-0.41304	0.68
analysis/predict/WEIGHTS//chr10:70992700-70993250.wgt.RDat	chr10:70992700-70993250	10	70992700	70993250		rs5030938	-4.011	rs5030945	0.333462	-6.857	-1.43529	35	1	top1.qtl	0.3	8.5e-12	1.43529	0.151
analysis/predict/WEIGHTS//chr10:72190350-72190600.wgt.RDat	chr10:72190350-72190600	10	72190350	72190600		rs3793809	0.918	rs7072552	-0.057799	1.793	0.48214	18	1	lasso.plasma	0.037	0.015	0.48214	0.63
analysis/predict/WEIGHTS//chr10:7244550-7245350.wgt.RDat	chr10:7244550-7245350	10	7244550	7245350		rs2692802	-2.22	rs2692824	-0.054317	2.322	0.73256	31	7	lasso.plasma	0.0769	0.00076	1.16468	0.244
analysis/predict/WEIGHTS//chr10:73101950-73102450.wgt.RDat	chr10:73101950-73102450	10	73101950	73102450		rs10999773	-1.941	rs703256	-0.07646	3.4	-0.61538	41	1	top1	0.067	0.0016	-0.61538	0.538
analysis/predict/WEIGHTS//chr10:73272450-73273200.wgt.RDat	chr10:73272450-73273200	10	73272450	73273200		rs4747161	1.814	rs3802719	0.479024	-7.702	0.33708	38	1	top1.as	0.32	7e-13	-0.31461	0.753
analysis/predict/WEIGHTS//chr10:7329950-7330650.wgt.RDat	chr10:7329950-7330650	10	7329950	7330650		rs2692780	2.384	rs1359780	0.294058	3.428	1.9186	28	1	top1	0.294	0.0036	1.9186	0.055
analysis/predict/WEIGHTS//chr10:73610750-73611300.wgt.RDat	chr10:73610750-73611300	10	73610750	73611300		rs762571	-1.812	rs2854992	-0.043468	2.249	-1.43617	27	1	top1	0.049	0.0062	-1.43617	0.151
analysis/predict/WEIGHTS//chr10:73790450-73790900.wgt.RDat	chr10:73790450-73790900	10	73790450	73790900		rs16929563	-0.59	rs4148944	-0.065936	-2.064	-0.48921	33	1	top1.as	0.3771	0.0088	0.35955	0.719
analysis/predict/WEIGHTS//chr10:74576300-74576850.wgt.RDat	chr10:74576300-74576850	10	74576300	74576850		rs2166334	1.759	rs7919738	0.422673	0.563	1.74713	20	1	top1	0.4227	0.013	1.74713	0.0806
analysis/predict/WEIGHTS//chr10:7475000-7475800.wgt.RDat	chr10:7475000-7475800	10	7475000	7475800		rs7079853	1.36	rs7077972	-0.076712	-2.665	0.88172	26	1	top1.qtl	0.045	0.0085	-0.53804	0.591
analysis/predict/WEIGHTS//chr10:7536100-7536650.wgt.RDat	chr10:7536100-7536650	10	7536100	7536650		rs17142722	1.777	rs1157042	0.031611	-1.429	0.28049	39	1	top1.as	0.065	0.0018	0.19048	0.849
analysis/predict/WEIGHTS//chr10:75503700-75504250.wgt.RDat	chr10:75503700-75504250	10	75503700	75504250		rs10762563	1.373	rs11000764	-0.052458	2.969	0.4174	15	3	lasso	0.2636	0.012	1.15554	0.248
analysis/predict/WEIGHTS//chr10:7603050-7603700.wgt.RDat	chr10:7603050-7603700	10	7603050	7603700		rs3824658	-2.51	rs12774458	0.14167	1.396	1.44037	44	1	top1.as	0.50377	0.0011	-1.88889	0.0589
analysis/predict/WEIGHTS//chr10:77022150-77022900.wgt.RDat	chr10:77022150-77022900	10	77022150	77022900		rs1259508	-1.691	rs1149711	-0.003924	3.156	1.31765	21	1	top1	0.0536	0.0044	1.31765	0.188
analysis/predict/WEIGHTS//chr10:77348450-77349100.wgt.RDat	chr10:77348450-77349100	10	77348450	77349100		rs4746308	-2.158	rs3001920	-0.039824	-1.848	0.65957	17	1	top1.qtl	0.066	0.0017	-0.65957	0.51
analysis/predict/WEIGHTS//chr10:77809900-77810400.wgt.RDat	chr10:77809900-77810400	10	77809900	77810400		rs1898065	-2.218	rs1898064	0.406822	-6.18	1.85714	26	5	lasso.plasma	0.18	1.9e-07	-1.93987	0.0524
analysis/predict/WEIGHTS//chr10:77832100-77832600.wgt.RDat	chr10:77832100-77832600	10	77832100	77832600		rs1898065	-2.218	rs4746354	0.345619	-6.485	1.77381	24	1	top1.as	0.24	2.2e-09	-1.72619	0.0843
analysis/predict/WEIGHTS//chr10:78319450-78320000.wgt.RDat	chr10:78319450-78320000	10	78319450	78320000		rs10824422	0.951	rs1907306	0.142209	-1.408	-0.70229	33	1	top1.qtl	0.411	0.001	0.03797	0.97
analysis/predict/WEIGHTS//chr10:78732800-78733400.wgt.RDat	chr10:78732800-78733400	10	78732800	78733400		rs11001950	-3.042	rs7076990	-0.061516	-2.378	-2.71429	42	1	top1.qtl	0.056	0.0035	-0.06618	0.947
analysis/predict/WEIGHTS//chr10:78988150-78988650.wgt.RDat	chr10:78988150-78988650	10	78988150	78988650		rs10762752	-2.059	rs2616612	0.137643	-4.267	-1.5506	27	5	lasso	0.048	0.0069	0.3641	0.716
analysis/predict/WEIGHTS//chr10:79315600-79315900.wgt.RDat	chr10:79315600-79315900	10	79315600	79315900		rs2673418	2.5	rs2673417	0.059947	-3.262	-1.3494	24	1	top1.as	0.04	0.013	-0.69136	0.489
analysis/predict/WEIGHTS//chr10:79382700-79383200.wgt.RDat	chr10:79382700-79383200	10	79382700	79383200		rs7071206	-1.356	rs2619635	-0.024422	1.965	-0.09581	29	1	top1.qtl	0.4178	0.014	-1.24444	0.213
analysis/predict/WEIGHTS//chr10:79596000-79596450.wgt.RDat	chr10:79596000-79596450	10	79596000	79596450		rs10824583	-1.755	rs1272013	-0.088746	2.039	1.51613	25	1	top1.qtl	0.074	0.00096	1.51613	0.129
analysis/predict/WEIGHTS//chr10:80037550-80038150.wgt.RDat	chr10:80037550-80038150	10	80037550	80038150		rs2140386	2.323	rs4979952	0.024095	-1.846	0.9545	38	4	lasso	0.2677	0.0028	0.40068	0.689
analysis/predict/WEIGHTS//chr10:8015350-8016000.wgt.RDat	chr10:8015350-8016000	10	8015350	8016000		rs12258684	2.244	rs407644	-0.051208	-2.037	0.77863	26	1	top1.qtl	0.065	0.0018	-0.77863	0.436
analysis/predict/WEIGHTS//chr10:80241300-80242550.wgt.RDat	chr10:80241300-80242550	10	80241300	80242550		rs1821372	-3.525	rs2254238	-0.021715	-2.036	2.22353	44	1	top1.qtl	0.052	0.005	-1.1978	0.231
analysis/predict/WEIGHTS//chr10:80489200-80490300.wgt.RDat	chr10:80489200-80490300	10	80489200	80490300		rs1550023	2.872	rs1865358	0.074761	-1.98	-2.39604	46	1	top1.qtl	0.088	0.00033	0.5	0.617
analysis/predict/WEIGHTS//chr10:80502300-80503050.wgt.RDat	chr10:80502300-80503050	10	80502300	80503050		rs1550023	2.872	rs12357218	0.181563	-3.136	-1.25862	44	1	top1	0.1816	0.0023	1.25862	0.208
analysis/predict/WEIGHTS//chr10:80564900-80565500.wgt.RDat	chr10:80564900-80565500	10	80564900	80565500		rs536394	1.353	rs4979837	0.057788	-1.473	1.21359	34	1	top1.as	0.1728	0.0062	0.59184	0.554
analysis/predict/WEIGHTS//chr10:80809100-80809600.wgt.RDat	chr10:80809100-80809600	10	80809100	80809600		rs10824702	2.628	rs6480917	-0.058818	2.027	0.01961	32	1	top1	0.038	0.014	0.01961	0.984
analysis/predict/WEIGHTS//chr10:81158800-81159550.wgt.RDat	chr10:81158800-81159550	10	81158800	81159550		rs2395577	1.738	rs10824749	0.001159	-3.381	-0.70833	32	1	top1.qtl	0.041	0.011	0.70833	0.479
analysis/predict/WEIGHTS//chr10:81374650-81375250.wgt.RDat	chr10:81374650-81375250	10	81374650	81375250		rs1650169	1.087	rs1713321	0.033565	4.241	1.07874	3	1	top1.as	0.144	4.2e-06	1.08661	0.277
analysis/predict/WEIGHTS//chr10:8170250-8171100.wgt.RDat	chr10:8170250-8171100	10	8170250	8171100		rs2798828	1.733	rs1618853	0.106079	5.279	0.63636	28	11	lasso.plasma	0.14	4.2e-06	1.23303	0.218
analysis/predict/WEIGHTS//chr10:82227450-82228300.wgt.RDat	chr10:82227450-82228300	10	82227450	82228300		rs1870146	2.536	rs4934169	-0.037492	1.303	-2.46154	25	1	top1.qtl	0.06	0.0026	-2.46154	0.0138
analysis/predict/WEIGHTS//chr10:8431650-8432200.wgt.RDat	chr10:8431650-8432200	10	8431650	8432200		rs9783189	1.533	rs7898807	-0.058083	2.404	0.55063	36	16	lasso.as	0.047	0.0074	0.98486	0.325
analysis/predict/WEIGHTS//chr10:84387950-84388650.wgt.RDat	chr10:84387950-84388650	10	84387950	84388650		rs1481129	-2.712	rs1481129	0.248202	-5.197	-2.7119	24	9	lasso	0.22	1.2e-08	1.92313	0.0545
analysis/predict/WEIGHTS//chr10:8577000-8577650.wgt.RDat	chr10:8577000-8577650	10	8577000	8577650		rs6602318	2.15	rs10508357	0.184901	3.828	-0.47093	59	1	top1	0.065	0.0018	-0.47093	0.638
analysis/predict/WEIGHTS//chr10:86099750-86100400.wgt.RDat	chr10:86099750-86100400	10	86099750	86100400		rs10749486	2.974	rs4934003	0.06007	-3.331	0.04878	13	1	top1.as	0.2934	0.0037	-0.65	0.516
analysis/predict/WEIGHTS//chr10:86121800-86122700.wgt.RDat	chr10:86121800-86122700	10	86121800	86122700		rs10749486	2.974	rs11591310	0.1037	-5.283	-2.28866	15	1	top1	0.14	7.7e-06	2.28866	0.0221
analysis/predict/WEIGHTS//chr10:86470700-86471250.wgt.RDat	chr10:86470700-86471250	10	86470700	86471250		rs17103921	-2.024	rs12780817	0.141821	5.28	-0.02326	26	1	top1.qtl	0.21	2.9e-08	-0.02326	0.981
analysis/predict/WEIGHTS//chr10:87071650-87072100.wgt.RDat	chr10:87071650-87072100	10	87071650	87072100		rs12782871	-1.14	rs11201561	-0.046569	1.007	-0.44231	24	1	top1.as	0.444	0.0004	0.50485	0.614
analysis/predict/WEIGHTS//chr10:87100500-87101150.wgt.RDat	chr10:87100500-87101150	10	87100500	87101150		rs12782871	-1.14	rs7915322	0.213877	-2.42	0.06349	20	1	top1	0.2139	0.015	-0.06349	0.949
analysis/predict/WEIGHTS//chr10:88684800-88685300.wgt.RDat	chr10:88684800-88685300	10	88684800	88685300		rs7082258	-1.616	rs17335915	0.353014	-4.16	1.19149	10	1	top1.qtl	0.087	0.00034	-1.18085	0.238
analysis/predict/WEIGHTS//chr10:88730950-88731350.wgt.RDat	chr10:88730950-88731350	10	88730950	88731350		rs1240400	-1.626	rs12416136	-0.013494	3.068	1.19753	23	1	top1.as	0.046	0.0081	0.69412	0.488
analysis/predict/WEIGHTS//chr10:88852250-88852950.wgt.RDat	chr10:88852250-88852950	10	88852250	88852950		rs9421580	1.196	rs9421579	-0.051079	2.841	0.64286	14	1	top1.qtl	0.041	0.011	0.64286	0.52
analysis/predict/WEIGHTS//chr10:89405900-89406450.wgt.RDat	chr10:89405900-89406450	10	89405900	89406450		rs2755427	-2.957	rs4934355	0.201662	3.343	0.91765	32	1	top1	0.202	0.013	0.91765	0.359
analysis/predict/WEIGHTS//chr10:89891450-89892050.wgt.RDat	chr10:89891450-89892050	10	89891450	89892050		rs10887787	2.477	rs10509534	0.413244	-2.718	-2.27132	30	1	top1	0.4132	0.0031	2.27132	0.0231
analysis/predict/WEIGHTS//chr10:90199500-90200250.wgt.RDat	chr10:90199500-90200250	10	90199500	90200250		rs1935581	-5.817	rs10749585	0.151126	3.844	-4.43299	24	1	top1.qtl	0.081	0.00055	-4.53125	5.86e-06
analysis/predict/WEIGHTS//chr10:90399750-90400500.wgt.RDat	chr10:90399750-90400500	10	90399750	90400500		rs861507	1.418	rs861507	0.017948	2.872	1.41758	11	1	top1.qtl	0.218	0.0072	1.41758	0.156
analysis/predict/WEIGHTS//chr10:90672850-90673350.wgt.RDat	chr10:90672850-90673350	10	90672850	90673350		rs3781211	-1.887	rs2304803	-0.023414	-2.014	0.24176	26	1	top1.qtl	0.053	0.0045	-0.24176	0.809
analysis/predict/WEIGHTS//chr10:90742900-90743500.wgt.RDat	chr10:90742900-90743500	10	90742900	90743500		rs12412106	2.504	rs7916294	0.071131	-3.986	0.41176	30	1	top1.as	0.204	0.002	0.53933	0.59
analysis/predict/WEIGHTS//chr10:91654850-91655300.wgt.RDat	chr10:91654850-91655300	10	91654850	91655300		rs1111713	0.957	rs2798616	0.084798	-3.907	0.35294	17	1	top1	0.086	0.00037	-0.35294	0.724
analysis/predict/WEIGHTS//chr10:92705700-92706150.wgt.RDat	chr10:92705700-92706150	10	92705700	92706150		rs11186398	-1.704	rs11186398	0.210453	-5.271	-1.7037	19	1	top1.qtl	0.16	9.8e-07	1.66667	0.0956
analysis/predict/WEIGHTS//chr10:92783050-92783650.wgt.RDat	chr10:92783050-92783650	10	92783050	92783650		rs7082870	1.839	rs2002552	0.25866	1.333	-1.10465	27	15	lasso.as	0.7174	5.8e-06	0.80471	0.421
analysis/predict/WEIGHTS//chr10:93368200-93368950.wgt.RDat	chr10:93368200-93368950	10	93368200	93368950		rs11186635	3.299	rs4933212	-0.021522	2.67	0.38532	38	1	top1.qtl	0.05	0.0056	1.01942	0.308
analysis/predict/WEIGHTS//chr10:93392800-93393200.wgt.RDat	chr10:93392800-93393200	10	93392800	93393200		rs11186635	3.299	rs7475251	0.049806	-2.533	-0.42683	14	1	top1.qtl	0.4871	0.00024	-1.68504	0.092
analysis/predict/WEIGHTS//chr10:93450100-93450700.wgt.RDat	chr10:93450100-93450700	10	93450100	93450700		rs7085998	3.184	rs7073486	-0.031304	-2.564	-0.92857	20	1	top1	0.039	0.013	0.92857	0.353
analysis/predict/WEIGHTS//chr10:93573550-93573950.wgt.RDat	chr10:93573550-93573950	10	93573550	93573950		rs1770474	2.963	rs2066276	0.178319	-4.149	-0.45238	13	1	top1.qtl	0.098	0.00015	-0.70115	0.483
analysis/predict/WEIGHTS//chr10:93729400-93730150.wgt.RDat	chr10:93729400-93730150	10	93729400	93730150		rs7911552	-0.833	rs11819184	0.011284	-2.5	-0.3271	16	2	lasso	0.3494	0.00034	0.33349	0.739
analysis/predict/WEIGHTS//chr10:95014650-95015100.wgt.RDat	chr10:95014650-95015100	10	95014650	95015100		rs17384860	2.576	rs11818234	-0.045335	1.252	-0.03659	24	1	top1.qtl	0.051	0.0054	2.57576	0.01
analysis/predict/WEIGHTS//chr10:95509150-95509500.wgt.RDat	chr10:95509150-95509500	10	95509150	95509500		rs1339579	1.582	rs7897180	-0.028784	2.646	-0.83871	35	1	top1	0.039	0.013	-0.83871	0.402
analysis/predict/WEIGHTS//chr10:95656850-95657400.wgt.RDat	chr10:95656850-95657400	10	95656850	95657400		rs4917958	-1.724	rs11187723	0.311691	-6.146	1.6092	19	1	top1	0.19	1.3e-07	-1.6092	0.108
analysis/predict/WEIGHTS//chr10:95786750-95787400.wgt.RDat	chr10:95786750-95787400	10	95786750	95787400		rs1935960	1.628	rs1925243	0.109249	4.731	-0.61458	28	1	top1	0.13	1.3e-05	-0.61458	0.539
analysis/predict/WEIGHTS//chr10:96087350-96087750.wgt.RDat	chr10:96087350-96087750	10	96087350	96087750		rs2077218	1.469	rs7092226	0.28287	-0.854	-0.35417	21	1	top1.as	0.5227	0.0029	-1.02198	0.307
analysis/predict/WEIGHTS//chr10:96236050-96236500.wgt.RDat	chr10:96236050-96236500	10	96236050	96236500		rs11187980	2.388	rs11187968	0.184179	-0.755	0.38835	11	1	top1.as	0.406	0.0014	-1.07229	0.284
analysis/predict/WEIGHTS//chr10:97480450-97481000.wgt.RDat	chr10:97480450-97481000	10	97480450	97481000		rs1933166	1.832	rs3934409	0.200618	-3.882	1.14815	10	1	top1	0.064	0.002	-1.14815	0.251
analysis/predict/WEIGHTS//chr10:98292050-98292800.wgt.RDat	chr10:98292050-98292800	10	98292050	98292800		rs17391197	-1.333	rs10748681	-0.019463	-1.383	0.16667	21	1	top1.qtl	0.041	0.011	-1.22619	0.22
analysis/predict/WEIGHTS//chr10:98327950-98328700.wgt.RDat	chr10:98327950-98328700	10	98327950	98328700		rs11188825	1.286	rs7448	0.047271	-3.793	0.08989	17	8	lasso.plasma	0.23	4.2e-09	0.06059	0.952
analysis/predict/WEIGHTS//chr10:98341250-98341800.wgt.RDat	chr10:98341250-98341800	10	98341250	98341800		rs7074516	1.429	rs11188849	-0.009308	-1.646	-1.09483	19	1	top1.as	0.1625	0.011	1.09483	0.274
analysis/predict/WEIGHTS//chr10:99400050-99400500.wgt.RDat	chr10:99400050-99400500	10	99400050	99400500		rs11189312	2.396	rs6584138	0.011179	1.955	1.88095	12	1	top1.qtl	0.051	0.0053	1.88095	0.06
analysis/predict/WEIGHTS//chr10:99403400-99403850.wgt.RDat	chr10:99403400-99403850	10	99403400	99403850		rs11189312	2.396	rs3890727	0.183457	-1.897	-0.50562	10	1	top1.qtl	0.054	0.0041	-2.39623	0.0166
analysis/predict/WEIGHTS//chr11:100543350-100544000.wgt.RDat	chr11:100543350-100544000	11	100543350	100544000		rs6590805	2.012	rs11224368	-0.034053	1.765	-0.62385	23	1	top1.qtl	0.211	0.0094	-0.62385	0.533
analysis/predict/WEIGHTS//chr11:100708100-100708350.wgt.RDat	chr11:100708100-100708350	11	100708100	100708350		rs599651	-1.885	rs11224491	0.134285	1.322	-0.58784	28	1	top1	0.04	0.013	-0.58784	0.557
analysis/predict/WEIGHTS//chr11:100773450-100773950.wgt.RDat	chr11:100773450-100773950	11	100773450	100773950		rs11224500	1.618	rs649512	-0.044088	-2.836	-0.4945	18	1	top1.qtl	0.057	0.0035	0.49451	0.621
analysis/predict/WEIGHTS//chr11:100812900-100813400.wgt.RDat	chr11:100812900-100813400	11	100812900	100813400		rs17647207	1.921	rs640326	0.376341	-7.403	0.45652	55	1	top1.as	0.38	2e-15	-0.45652	0.648
analysis/predict/WEIGHTS//chr11:100984200-100984650.wgt.RDat	chr11:100984200-100984650	11	100984200	100984650		rs493220	1.447	rs541463	-0.09021	3.96	0.0541	18	3	lasso	0.148	3.2e-06	0.113	0.91
analysis/predict/WEIGHTS//chr11:102048550-102049450.wgt.RDat	chr11:102048550-102049450	11	102048550	102049450		rs17689778	2.362	rs11602707	-0.023371	-2.936	0.11111	16	1	top1.qtl	0.118	3.3e-05	-0.11111	0.912
analysis/predict/WEIGHTS//chr11:102150400-102151150.wgt.RDat	chr11:102150400-102151150	11	102150400	102151150		rs2852889	1.273	rs11225192	0.065267	3.479	0.2759	16	7	lasso.plasma	0.091	0.00025	0.66227	0.508
analysis/predict/WEIGHTS//chr11:102176800-102177550.wgt.RDat	chr11:102176800-102177550	11	102176800	102177550		rs2852889	1.273	rs1894115	0.43298	-6.195	-0.4286	13	3	lasso.as	0.15	2e-06	1.36566	0.172
analysis/predict/WEIGHTS//chr11:102183050-102184050.wgt.RDat	chr11:102183050-102184050	11	102183050	102184050		rs17882441	1.181	rs11225211	0.17921	-0.731	0.21622	13	1	top1	0.1792	0.015	-0.21622	0.829
analysis/predict/WEIGHTS//chr11:102364950-102365350.wgt.RDat	chr11:102364950-102365350	11	102364950	102365350		rs7945819	4.079	rs7115883	-0.055387	2.45	-0.2718	36	3	lasso	0.403	0.0027	1.82	0.0688
analysis/predict/WEIGHTS//chr11:102447100-102447600.wgt.RDat	chr11:102447100-102447600	11	102447100	102447600		rs12807781	-4.082	rs2292730	0.063359	-4.799	2.7561	48	1	top1	0.181	2.1e-07	-2.7561	0.00585
analysis/predict/WEIGHTS//chr11:102500400-102501100.wgt.RDat	chr11:102500400-102501100	11	102500400	102501100		rs2245803	2.624	rs2509024	-0.021619	-2.701	2.1939	38	13	lasso.as	0.1369	0.0061	-0.26637	0.79
analysis/predict/WEIGHTS//chr11:10490250-10490900.wgt.RDat	chr11:10490250-10490900	11	10490250	10490900		rs1466427	2.838	rs3802917	0.045285	-3.043	-0.83333	32	1	top1.qtl	0.1048	0.012	0.83333	0.405
analysis/predict/WEIGHTS//chr11:105017250-105017650.wgt.RDat	chr11:105017250-105017650	11	105017250	105017650		rs17103781	-2.712	rs3736149	0.416818	3.639	-1.45238	24	1	top1	0.052	0.0049	-1.45238	0.146
analysis/predict/WEIGHTS//chr11:105371300-105371950.wgt.RDat	chr11:105371300-105371950	11	105371300	105371950		rs10750725	-2.546	rs7120172	0.23057	2.287	-1.20482	16	1	top1.as	0.3545	0.0012	-1.20482	0.228
analysis/predict/WEIGHTS//chr11:1054250-1055050.wgt.RDat	chr11:1054250-1055050	11	1054250	1055050		rs2071173	3.041	rs10794359	-0.090406	-1.936	-1.05556	21	1	top1.qtl	0.06	0.0028	0.40816	0.683
analysis/predict/WEIGHTS//chr11:105571700-105572350.wgt.RDat	chr11:105571700-105572350	11	105571700	105572350		rs11226827	-1.116	rs4755107	-0.045016	0.8	-0.67442	14	1	top1	0.037	0.015	-0.67442	0.5
analysis/predict/WEIGHTS//chr11:10654950-10655250.wgt.RDat	chr11:10654950-10655250	11	10654950	10655250		rs10840456	1.08	rs7944136	0.339205	1.988	0.01554	39	1	top1.as	0.4289	0.0013	0.01554	0.988
analysis/predict/WEIGHTS//chr11:107032250-107032950.wgt.RDat	chr11:107032250-107032950	11	107032250	107032950		rs6421539	1.4	rs10789571	0.497941	-7.429	-0.6747	20	1	top1.as	0.34	1.8e-13	0.68293	0.495
analysis/predict/WEIGHTS//chr11:107673950-107674550.wgt.RDat	chr11:107673950-107674550	11	107673950	107674550		rs502398	-0.805	rs17174388	-0.026312	3.211	0.4571	24	6	lasso	0.1444	4.2e-06	0.6402	0.522
analysis/predict/WEIGHTS//chr11:10772450-10772950.wgt.RDat	chr11:10772450-10772950	11	10772450	10772950		rs6484483	1.824	rs10840482	0.191027	-1.235	-0.88235	23	1	top1.as	0.2021	0.012	-0.11828	0.906
analysis/predict/WEIGHTS//chr11:107986400-107986750.wgt.RDat	chr11:107986400-107986750	11	107986400	107986750		rs7931681	-2.824	rs12577790	-0.008222	3.464	0.95745	14	1	top1.as	0.4562	0.0033	0.93496	0.35
analysis/predict/WEIGHTS//chr11:108367900-108368800.wgt.RDat	chr11:108367900-108368800	11	108367900	108368800		rs3824987	3.013	rs2640779	0.136219	-1.811	0.10753	14	1	top1.as	0.3528	0.0055	-0.10753	0.914
analysis/predict/WEIGHTS//chr11:108457300-108457900.wgt.RDat	chr11:108457300-108457900	11	108457300	108457900		rs17108340	3.789	rs2846419	-0.02826	-3.211	0.2561	26	3	lasso	0.104	9.5e-05	-0.6567	0.511
analysis/predict/WEIGHTS//chr11:108477150-108478100.wgt.RDat	chr11:108477150-108478100	11	108477150	108478100		rs17108340	3.789	rs4539291	0.071117	4.982	1.32927	18	1	top1	0.129	1.4e-05	1.32927	0.184
analysis/predict/WEIGHTS//chr11:111072500-111073050.wgt.RDat	chr11:111072500-111073050	11	111072500	111073050		rs2176441	-1.293	rs949279	0.137959	-5.899	0.2674	23	3	lasso.plasma	0.268	1.2e-10	0.1742	0.862
analysis/predict/WEIGHTS//chr11:111102950-111103500.wgt.RDat	chr11:111102950-111103500	11	111102950	111103500		rs1986684	-1.269	rs11825265	0.035878	-3.267	0.36585	27	1	top1	0.049	0.0063	-0.36585	0.714
analysis/predict/WEIGHTS//chr11:111173950-111174850.wgt.RDat	chr11:111173950-111174850	11	111173950	111174850		rs10891244	-1.92	rs1046872	0.263289	2.985	-0.71084	27	1	top1	0.2633	0.0037	-0.71084	0.477
analysis/predict/WEIGHTS//chr11:111260850-111261400.wgt.RDat	chr11:111260850-111261400	11	111260850	111261400		rs883326	1.8	rs4938510	-0.029706	-3.027	0.05882	22	1	top1.qtl	0.081	0.00056	-0.05882	0.953
analysis/predict/WEIGHTS//chr11:111498100-111498850.wgt.RDat	chr11:111498100-111498850	11	111498100	111498850		rs1789355	4.125	rs495460	0.497281	-7.778	4.10227	9	1	top1.qtl	0.27	1.2e-10	-4.10227	4.09e-05
analysis/predict/WEIGHTS//chr11:11240100-11240600.wgt.RDat	chr11:11240100-11240600	11	11240100	11240600		rs12287713	2.375	rs10741534	-0.094948	-1.492	0.55454	31	1	top1.qtl	0.08	0.00059	-0.69369	0.488
analysis/predict/WEIGHTS//chr11:112628050-112628500.wgt.RDat	chr11:112628050-112628500	11	112628050	112628500		rs600052	1.902	rs12785570	0.084135	4.552	-0.3333	26	3	lasso.plasma	0.145	3.9e-06	-0.22976	0.818
analysis/predict/WEIGHTS//chr11:113602800-113603200.wgt.RDat	chr11:113602800-113603200	11	113602800	113603200		rs7105512	-5.528	rs7932415	0.366357	2.705	-5.32692	25	1	top1	0.3664	0.013	-5.32692	9.99e-08
analysis/predict/WEIGHTS//chr11:113652700-113653350.wgt.RDat	chr11:113652700-113653350	11	113652700	113653350		rs2428022	-6.105	rs1713674	-0.006345	3.365	4.9764	18	10	lasso.plasma	0.118	3.3e-05	4.35727	1.32e-05
analysis/predict/WEIGHTS//chr11:113872050-113872750.wgt.RDat	chr11:113872050-113872750	11	113872050	113872750		rs1182457	-4.278	rs7126511	-0.001308	-2.177	-1.3889	28	15	lasso.as	0.4934	1.7e-05	1.31465	0.189
analysis/predict/WEIGHTS//chr11:113949000-113949400.wgt.RDat	chr11:113949000-113949400	11	113949000	113949400		rs2509220	3.071	rs1784692	0.429448	-6.936	0.981	28	5	lasso.plasma	0.28	5.5e-11	-0.2998	0.764
analysis/predict/WEIGHTS//chr11:113999050-113999650.wgt.RDat	chr11:113999050-113999650	11	113999050	113999650		rs238924	-2.157	rs17116453	-0.090493	2.131	-1.4044	38	22	lasso	0.162	1e-06	-1.9256	0.0542
analysis/predict/WEIGHTS//chr11:114003350-114004100.wgt.RDat	chr11:114003350-114004100	11	114003350	114004100		rs17116384	-1.932	rs628946	-0.002678	-3.27	1.3146	38	10	lasso	0.066	0.0017	0.5975	0.55
analysis/predict/WEIGHTS//chr11:114186400-114187350.wgt.RDat	chr11:114186400-114187350	11	114186400	114187350		rs2155806	2.357	rs2847492	-0.016785	1.447	1.21429	40	1	top1.qtl	0.055	0.0039	-1.58065	0.114
analysis/predict/WEIGHTS//chr11:114271000-114271500.wgt.RDat	chr11:114271000-114271500	11	114271000	114271500		rs9326243	1.49	rs4938102	0.094224	1.951	0.39286	26	1	top1.qtl	0.059	0.0029	0.39286	0.694
analysis/predict/WEIGHTS//chr11:11534900-11535450.wgt.RDat	chr11:11534900-11535450	11	11534900	11535450		rs4910365	-2.064	rs4077732	0.149495	-3.61	0.16092	59	1	top1	0.15	0.0073	-0.16092	0.872
analysis/predict/WEIGHTS//chr11:115766450-115766950.wgt.RDat	chr11:115766450-115766950	11	115766450	115766950		rs6589517	-1.412	rs693246	0.469749	-5.578	0.4268	26	6	lasso.plasma	0.14	4e-06	0.11171	0.911
analysis/predict/WEIGHTS//chr11:115791700-115792500.wgt.RDat	chr11:115791700-115792500	11	115791700	115792500		rs369845	-1.443	rs12805721	-0.030318	1.361	-0.68675	27	1	top1	0.04	0.012	-0.68675	0.492
analysis/predict/WEIGHTS//chr11:11644250-11644900.wgt.RDat	chr11:11644250-11644900	11	11644250	11644900		rs12283371	2.286	rs10765880	-0.015291	-1.465	-1.19318	30	1	top1.as	0.182	0.0036	-2.28571	0.0223
analysis/predict/WEIGHTS//chr11:117068050-117068550.wgt.RDat	chr11:117068050-117068550	11	117068050	117068550		rs4938355	-1.64	rs2075547	-0.026658	1.62	-1.61947	16	1	top1.as	0.421	0.0028	0.25581	0.798
analysis/predict/WEIGHTS//chr11:117685350-117685900.wgt.RDat	chr11:117685350-117685900	11	117685350	117685900		rs625447	-2.012	rs10892178	0.362557	4.266	-1.18293	45	1	top1	0.363	0.0011	-1.18293	0.237
analysis/predict/WEIGHTS//chr11:11804000-11804450.wgt.RDat	chr11:11804000-11804450	11	11804000	11804450		rs1455263	-1.595	rs12416698	0.424002	3.526	0.768	45	1	top1	0.424	0.0068	0.768	0.442
analysis/predict/WEIGHTS//chr11:118560550-118561100.wgt.RDat	chr11:118560550-118561100	11	118560550	118561100		rs573905	2.518	rs10892251	-0.032725	2.865	-1.82105	26	1	top1	0.088	0.00032	-1.82105	0.0686
analysis/predict/WEIGHTS//chr11:119252200-119252800.wgt.RDat	chr11:119252200-119252800	11	119252200	119252800		rs2096834	2.793	rs576945	0.088177	0.94	-1.37398	14	1	top1.qtl	0.071	0.0012	-2.07879	0.0376
analysis/predict/WEIGHTS//chr11:120981650-120982150.wgt.RDat	chr11:120981650-120982150	11	120981650	120982150		rs1893023	2.5	rs598650	0.064014	4.013	-1.05435	41	1	top1.qtl	0.113	4.6e-05	-1.05435	0.292
analysis/predict/WEIGHTS//chr11:121002650-121003350.wgt.RDat	chr11:121002650-121003350	11	121002650	121003350		rs1893023	2.5	rs7105712	0.093068	6.171	1.94505	47	1	top1	0.315	1.4e-12	1.94505	0.0518
analysis/predict/WEIGHTS//chr11:121065750-121066500.wgt.RDat	chr11:121065750-121066500	11	121065750	121066500		rs12787035	-1.6	rs11218200	-0.024591	1.053	1.05357	22	1	top1	0.079	0.00064	1.05357	0.292
analysis/predict/WEIGHTS//chr11:121139150-121139600.wgt.RDat	chr11:121139150-121139600	11	121139150	121139600		rs1560403	2.253	rs4423192	-0.058039	-3.497	-0.19753	30	1	top1.qtl	0.109	6.4e-05	0.19753	0.843
analysis/predict/WEIGHTS//chr11:12131800-12132250.wgt.RDat	chr11:12131800-12132250	11	12131800	12132250		rs4237703	-2.363	rs1485964	0.0337	-1.474	-0.04348	42	1	top1.qtl	0.045	0.0085	-1.18286	0.237
analysis/predict/WEIGHTS//chr11:121348850-121349450.wgt.RDat	chr11:121348850-121349450	11	121348850	121349450		rs668387	-3.024	rs4631890	0.111491	-2.546	1.36585	21	1	top1.as	0.222	0.01	-1.36585	0.172
analysis/predict/WEIGHTS//chr11:121394400-121394950.wgt.RDat	chr11:121394400-121394950	11	121394400	121394950		rs596437	-3	rs11601559	0.463536	-0.909	-1.9615	18	4	lasso.plasma	0.7688	4e-06	-2.03491	0.0419
analysis/predict/WEIGHTS//chr11:121867250-121867750.wgt.RDat	chr11:121867250-121867750	11	121867250	121867750		rs1944465	-1.851	rs12293988	0.041937	2.644	1.09574	9	1	top1	0.039	0.013	1.09574	0.273
analysis/predict/WEIGHTS//chr11:12271050-12271600.wgt.RDat	chr11:12271050-12271600	11	12271050	12271600		rs12294434	2.833	rs7946040	0.085295	-2.916	0.57647	58	1	top1.qtl	0.045	0.0085	-1.52381	0.128
analysis/predict/WEIGHTS//chr11:123138700-123139300.wgt.RDat	chr11:123138700-123139300	11	123138700	123139300		rs7927484	-1.301	rs7927484	0.071531	-3.612	-1.3009	30	4	lasso.plasma	0.08	0.00059	0.86486	0.387
analysis/predict/WEIGHTS//chr11:124146000-124146550.wgt.RDat	chr11:124146000-124146550	11	124146000	124146550		rs11559533	-1.889	rs2466629	0.411154	-0.706	-1.36937	29	1	top1	0.4112	0.0018	1.36937	0.171
analysis/predict/WEIGHTS//chr11:125080950-125081600.wgt.RDat	chr11:125080950-125081600	11	125080950	125081600		rs601414	-0.975	rs589839	0.035673	1.754	-0.22105	36	1	top1.qtl	0.038	0.015	-0.22105	0.825
analysis/predict/WEIGHTS//chr11:125788850-125789450.wgt.RDat	chr11:125788850-125789450	11	125788850	125789450		rs2236681	2.383	rs553728	0.350247	2.093	-0.4188	35	1	top1	0.3502	0.015	-0.4188	0.675
analysis/predict/WEIGHTS//chr11:125941850-125942550.wgt.RDat	chr11:125941850-125942550	11	125941850	125942550		rs12808304	-2.552	rs559262	-0.021247	2.115	-1.19811	28	1	top1.as	0.13272	0.0069	-1.60465	0.109
analysis/predict/WEIGHTS//chr11:125985700-125986300.wgt.RDat	chr11:125985700-125986300	11	125985700	125986300		rs17135126	-1.617	rs17459831	0.122733	-3.341	-0.51701	35	1	top1	0.058	0.0031	0.51701	0.605
analysis/predict/WEIGHTS//chr11:126084300-126085200.wgt.RDat	chr11:126084300-126085200	11	126084300	126085200		rs4420285	1.176	rs512577	0.052882	3.313	-0.5904	36	6	lasso.plasma	0.192	0.00021	-0.75909	0.448
analysis/predict/WEIGHTS//chr11:126235250-126235800.wgt.RDat	chr11:126235250-126235800	11	126235250	126235800		rs17135399	1.377	rs4937122	-0.070478	-2.877	0.8255	16	9	lasso	0.087	0.00036	-0.4243	0.671
analysis/predict/WEIGHTS//chr11:12824150-12824650.wgt.RDat	chr11:12824150-12824650	11	12824150	12824650		rs10500759	-2.695	rs12295774	-0.013453	2.302	-0.95035	19	1	top1.as	0.2806	0.0055	-0.69286	0.488
analysis/predict/WEIGHTS//chr11:128339600-128340300.wgt.RDat	chr11:128339600-128340300	11	128339600	128340300		rs12417993	-2.048	rs7122859	0.007303	1.09	0.46479	40	1	top1.qtl	0.046	0.0079	-0.96939	0.332
analysis/predict/WEIGHTS//chr11:128477650-128478250.wgt.RDat	chr11:128477650-128478250	11	128477650	128478250		rs7941765	-1.95	rs2213018	-0.009747	-3.415	-0.77907	27	1	top1.qtl	0.09	0.00028	0.77907	0.436
analysis/predict/WEIGHTS//chr11:129061450-129062100.wgt.RDat	chr11:129061450-129062100	11	129061450	129062100		rs2439796	-1.567	rs2508627	-0.014539	-2.535	-1.53719	12	1	top1	0.042	0.01	1.53719	0.124
analysis/predict/WEIGHTS//chr11:129145450-129145800.wgt.RDat	chr11:129145450-129145800	11	129145450	129145800		rs4616048	1.512	rs10894020	0.376581	-7.007	0.931	28	4	lasso.plasma	0.37	8.9e-15	-1.02076	0.307
analysis/predict/WEIGHTS//chr11:129238650-129239200.wgt.RDat	chr11:129238650-129239200	11	129238650	129239200		rs7103242	2.663	rs871640	0.149987	-1.612	-1.91358	30	1	top1	0.043	0.0099	1.91358	0.0557
analysis/predict/WEIGHTS//chr11:129326150-129326650.wgt.RDat	chr11:129326150-129326650	11	129326150	129326650		rs10894038	-2.271	rs10894040	-0.047325	-2.348	1.1301	29	6	lasso.as	0.4744	0.00022	-2.39454	0.0166
analysis/predict/WEIGHTS//chr11:129327150-129327650.wgt.RDat	chr11:129327150-129327650	11	129327150	129327650		rs10894038	-2.271	rs3019793	0.034465	-2.155	1.04545	29	1	top1.qtl	0.124	0.012	-1.04545	0.296
analysis/predict/WEIGHTS//chr11:129328650-129329200.wgt.RDat	chr11:129328650-129329200	11	129328650	129329200		rs10894038	-2.271	rs984176	-0.018606	2.223	-1.8313	29	10	lasso.as	0.1771	0.0012	-1.57061	0.116
analysis/predict/WEIGHTS//chr11:129511900-129512700.wgt.RDat	chr11:129511900-129512700	11	129511900	129512700		rs4936079	1.933	rs7122279	-0.012361	2.666	0.96342	21	1	top1.as	0.046	0.0075	-0.00909	0.993
analysis/predict/WEIGHTS//chr11:129721700-129722550.wgt.RDat	chr11:129721700-129722550	11	129721700	129722550		rs11221881	-3.525	rs11221881	0.0824	4.687	-3.525	20	1	top1.qtl	0.094	0.00021	-3.525	0.000423
analysis/predict/WEIGHTS//chr11:129723650-129724250.wgt.RDat	chr11:129723650-129724250	11	129723650	129724250		rs11221881	-3.525	rs509912	0.035882	2.953	-1.5	19	9	lasso.as	0.2218	0.00033	-0.43449	0.664
analysis/predict/WEIGHTS//chr11:12995300-12995750.wgt.RDat	chr11:12995300-12995750	11	12995300	12995750		rs10766022	-3.489	rs7942018	0.44829	-3.309	-1.25	27	1	top1	0.448	0.0071	1.25	0.211
analysis/predict/WEIGHTS//chr11:130299750-130300400.wgt.RDat	chr11:130299750-130300400	11	130299750	130300400		rs1872368	-1.859	rs4936098	-0.039943	-2.476	-0.05618	24	1	top1.qtl	0.051	0.0055	-1.03093	0.303
analysis/predict/WEIGHTS//chr11:130674600-130675000.wgt.RDat	chr11:130674600-130675000	11	130674600	130675000		rs1939904	1.759	rs4441021	0.266601	1.616	0.41111	40	1	top1	0.2666	0.0069	0.41111	0.681
analysis/predict/WEIGHTS//chr11:13089500-13090000.wgt.RDat	chr11:13089500-13090000	11	13089500	13090000		rs10430831	-3.305	rs12420605	-0.074122	2.456	0.46903	45	1	top1	0.037	0.015	0.46903	0.639
analysis/predict/WEIGHTS//chr11:132263400-132264050.wgt.RDat	chr11:132263400-132264050	11	132263400	132264050		rs11223055	-1.062	rs11223060	0.353661	-1.618	-0.03478	25	1	top1	0.354	0.0054	0.03478	0.972
analysis/predict/WEIGHTS//chr11:132273050-132273550.wgt.RDat	chr11:132273050-132273550	11	132273050	132273550		rs11223055	-1.062	rs7111704	0.262095	-1.328	-0.98315	30	1	top1.as	0.423	0.002	-0.98315	0.326
analysis/predict/WEIGHTS//chr11:133253200-133254100.wgt.RDat	chr11:133253200-133254100	11	133253200	133254100		rs3923706	2.744	rs7930676	0.094726	-4.395	1.4956	30	6	lasso.plasma	0.111	5.6e-05	-1.47258	0.141
analysis/predict/WEIGHTS//chr11:133593050-133593400.wgt.RDat	chr11:133593050-133593400	11	133593050	133593400		rs10431101	-3.822	rs11223572	-0.049104	2.499	2.41935	33	1	top1	0.039	0.013	2.41935	0.0155
analysis/predict/WEIGHTS//chr11:134267900-134268500.wgt.RDat	chr11:134267900-134268500	11	134267900	134268500		rs7928758	5.405	rs10791359	0.448953	3.37	-1.36	24	1	top1	0.449	0.00036	-1.36	0.174
analysis/predict/WEIGHTS//chr11:134367250-134368050.wgt.RDat	chr11:134367250-134368050	11	134367250	134368050		rs10791373	2.493	rs4582990	0.054571	4.421	-1.36458	35	1	top1.qtl	0.093	0.00022	-1.36458	0.172
analysis/predict/WEIGHTS//chr11:13499250-13500000.wgt.RDat	chr11:13499250-13500000	11	13499250	13500000		rs11022839	-1.475	rs307253	-0.025048	2.297	-0.9881	16	5	lasso.plasma	0.045	0.0082	-0.48353	0.629
analysis/predict/WEIGHTS//chr11:13651150-13651850.wgt.RDat	chr11:13651150-13651850	11	13651150	13651850		rs17455429	-1.402	rs10500792	0.137253	-4.123	0.4821	18	2	lasso.plasma	0.091	0.00027	-0.91133	0.362
analysis/predict/WEIGHTS//chr11:13784650-13785350.wgt.RDat	chr11:13784650-13785350	11	13784650	13785350		rs1730833	1.389	rs17535767	-0.033333	1.895	-0.2	19	1	top1.qtl	0.053	0.0046	-0.43374	0.664
analysis/predict/WEIGHTS//chr11:14212800-14213250.wgt.RDat	chr11:14212800-14213250	11	14212800	14213250		rs7936301	2.75	rs10766163	0.338738	4.229	-1.11765	18	1	top1	0.07	0.0013	-1.11765	0.264
analysis/predict/WEIGHTS//chr11:1524150-1524750.wgt.RDat	chr11:1524150-1524750	11	1524150	1524750		rs2334554	4.661	rs2334650	0.040111	3.428	3.7375	19	1	top1.qtl	0.037	0.015	3.7375	0.000186
analysis/predict/WEIGHTS//chr11:15295200-15295650.wgt.RDat	chr11:15295200-15295650	11	15295200	15295650		rs7928484	1.388	rs10766220	-0.062444	-2.172	-0.26829	25	1	top1	0.051	0.0052	0.26829	0.788
analysis/predict/WEIGHTS//chr11:15381750-15382550.wgt.RDat	chr11:15381750-15382550	11	15381750	15382550		rs7479972	-1.536	rs3936095	0.364419	3.194	-0.3765	21	3	lasso.plasma	0.529	0.0017	-1.2536	0.21
analysis/predict/WEIGHTS//chr11:15492650-15493150.wgt.RDat	chr11:15492650-15493150	11	15492650	15493150		rs7949952	1.329	rs7939628	-0.014519	1.634	0.27957	16	1	top1.as	0.2523	0.012	0.87	0.384
analysis/predict/WEIGHTS//chr11:15553750-15554800.wgt.RDat	chr11:15553750-15554800	11	15553750	15554800		rs7119351	1.157	rs2351097	0.247385	-1.059	-0.41667	13	1	top1	0.2474	0.00041	0.41667	0.677
analysis/predict/WEIGHTS//chr11:15914600-15915100.wgt.RDat	chr11:15914600-15915100	11	15914600	15915100		rs722317	-1.39	rs2196961	-0.027854	2.443	0.95294	29	1	top1.qtl	0.043	0.0095	0.95294	0.341
analysis/predict/WEIGHTS//chr11:16247550-16248300.wgt.RDat	chr11:16247550-16248300	11	16247550	16248300		rs1401454	3.53	rs1401454	0.531087	-9.063	3.53012	19	1	top1	0.42	3.5e-17	-3.53012	0.000415
analysis/predict/WEIGHTS//chr11:16379200-16379850.wgt.RDat	chr11:16379200-16379850	11	16379200	16379850		rs11821781	3.364	rs17554301	0.088486	-1.987	0.6124	17	1	top1.qtl	0.045	0.0084	-0.6124	0.54
analysis/predict/WEIGHTS//chr11:16768200-16769050.wgt.RDat	chr11:16768200-16769050	11	16768200	16769050		rs7128359	0.94	rs7128359	0.018991	-3.098	0.93966	16	1	top1	0.053	0.0046	-0.93966	0.347
analysis/predict/WEIGHTS//chr11:17230700-17231850.wgt.RDat	chr11:17230700-17231850	11	17230700	17231850		rs11607974	-2.545	rs644419	-0.024198	-1.663	0.70454	12	1	top1.as	0.1803	0.013	-0.70455	0.481
analysis/predict/WEIGHTS//chr11:17542650-17543100.wgt.RDat	chr11:17542650-17543100	11	17542650	17543100		rs10766408	2.207	rs1076311	0.152922	5.015	1.9881	55	1	top1.as	0.2161	1.2e-08	-0.04762	0.962
analysis/predict/WEIGHTS//chr11:17834000-17834600.wgt.RDat	chr11:17834000-17834600	11	17834000	17834600		rs11024405	1.427	rs10788	0.005891	-3.294	0.9926	27	12	lasso.as	0.1607	0.011	-1.46388	0.143
analysis/predict/WEIGHTS//chr11:19166750-19167850.wgt.RDat	chr11:19166750-19167850	11	19166750	19167850		rs2271001	-2.159	rs12801321	0.050979	1.564	-1.89535	16	1	top1.qtl	0.046	0.008	1.75	0.0801
analysis/predict/WEIGHTS//chr11:19850650-19851250.wgt.RDat	chr11:19850650-19851250	11	19850650	19851250		rs7129202	2.314	rs1425235	0.024021	-2.41	1.36923	39	1	top1.qtl	0.067	0.0016	2.31373	0.0207
analysis/predict/WEIGHTS//chr11:20883500-20884250.wgt.RDat	chr11:20883500-20884250	11	20883500	20884250		rs1429778	1.529	rs7109004	-0.016303	1.727	-0.1236	34	1	top1.qtl	0.043	0.01	1.15789	0.247
analysis/predict/WEIGHTS//chr11:2243550-2244250.wgt.RDat	chr11:2243550-2244250	11	2243550	2244250		rs7127900	17.388	rs10840606	-0.035402	-2.512	15.9307	28	1	top1.qtl	0.0392	0.013	-3.34677	0.000818
analysis/predict/WEIGHTS//chr11:23002850-23003400.wgt.RDat	chr11:23002850-23003400	11	23002850	23003400		rs2433474	-1.755	rs10833888	0.284655	-0.649	-0.54762	17	1	top1	0.2847	0.0062	0.54762	0.584
analysis/predict/WEIGHTS//chr11:23464300-23464850.wgt.RDat	chr11:23464300-23464850	11	23464300	23464850		rs10834086	-1.216	rs7948111	0.078668	-3.546	-0.59322	32	1	top1.as	0.038	0.014	0.59322	0.553
analysis/predict/WEIGHTS//chr11:23515550-23515800.wgt.RDat	chr11:23515550-23515800	11	23515550	23515800		rs1850824	-1.418	rs1350948	-0.035114	3.256	0.31579	53	1	top1.qtl	0.081	0.00055	0.31579	0.752
analysis/predict/WEIGHTS//chr11:23548750-23549300.wgt.RDat	chr11:23548750-23549300	11	23548750	23549300		rs7122954	-1.697	rs10734343	0.050678	1.711	-0.08654	40	1	top1.as	0.239	0.0023	1.12088	0.262
analysis/predict/WEIGHTS//chr11:24970900-24971400.wgt.RDat	chr11:24970900-24971400	11	24970900	24971400		rs6484088	-0.548	rs10834553	0.287861	4.987	0.4048	8	5	lasso.plasma	0.14	6.8e-06	0.13782	0.89
analysis/predict/WEIGHTS//chr11:25274400-25274850.wgt.RDat	chr11:25274400-25274850	11	25274400	25274850		rs17307778	1.277	rs4584535	0.561637	-1.652	-0.16667	17	1	top1	0.562	0.0042	0.16667	0.868
analysis/predict/WEIGHTS//chr11:25412000-25412650.wgt.RDat	chr11:25412000-25412650	11	25412000	25412650		rs7931259	0.758	rs2404085	0.243943	4.825	0.63918	23	1	top1	0.15	3.6e-06	0.63918	0.523
analysis/predict/WEIGHTS//chr11:25549400-25549900.wgt.RDat	chr11:25549400-25549900	11	25549400	25549900		rs1838075	2.804	rs11028743	-0.024446	-1.748	-0.74748	19	1	top1.qtl	0.139	6.2e-06	-0.60748	0.544
analysis/predict/WEIGHTS//chr11:26240700-26241850.wgt.RDat	chr11:26240700-26241850	11	26240700	26241850		rs1471318	-1.807	rs9332433	0.032321	-3.201	-0.55172	20	1	top1	0.046	0.0076	0.55172	0.581
analysis/predict/WEIGHTS//chr11:27109850-27110350.wgt.RDat	chr11:27109850-27110350	11	27109850	27110350		rs7942200	1.258	rs987687	0.54958	-4.242	0.5	15	1	top1.qtl	0.63	0.0017	-0.5	0.617
analysis/predict/WEIGHTS//chr11:27212600-27213150.wgt.RDat	chr11:27212600-27213150	11	27212600	27213150		rs1442931	3.175	rs7939668	0.035177	-3.259	0.43023	38	1	top1	0.043	0.0099	-0.43023	0.667
analysis/predict/WEIGHTS//chr11:27226650-27227350.wgt.RDat	chr11:27226650-27227350	11	27226650	27227350		rs1442931	3.175	rs11029868	-0.010815	-1.837	1.90351	36	1	top1.as	0.278	0.0057	-0.29565	0.767
analysis/predict/WEIGHTS//chr11:2828500-2828950.wgt.RDat	chr11:2828500-2828950	11	2828500	2828950		rs2237886	-2.441	rs2237892	0.441151	-1.916	0.00602	25	1	top1	0.441	0.004	-0.00602	0.995
analysis/predict/WEIGHTS//chr11:28637200-28637600.wgt.RDat	chr11:28637200-28637600	11	28637200	28637600		rs7935241	-1.291	rs12226518	0.68266	6.119	-0.87209	11	1	top1.as	0.22	6.3e-09	-0.87059	0.384
analysis/predict/WEIGHTS//chr11:31043550-31044200.wgt.RDat	chr11:31043550-31044200	11	31043550	31044200		rs17333520	1.54	rs288463	0.096122	5.84	1.45238	12	1	top1	0.201	4.3e-08	1.45238	0.146
analysis/predict/WEIGHTS//chr11:31136000-31136450.wgt.RDat	chr11:31136000-31136450	11	31136000	31136450		rs176372	1.721	rs7123092	-0.09068	1.407	-0.83168	9	1	top1.as	0.4262	0.013	0.91667	0.359
analysis/predict/WEIGHTS//chr11:3120500-3120950.wgt.RDat	chr11:3120500-3120950	11	3120500	3120950		rs7103109	2.945	rs8813	-0.066384	-1.235	-0.35353	28	1	top1.qtl	0.08	0.00059	-2.52525	0.0116
analysis/predict/WEIGHTS//chr11:3147650-3148250.wgt.RDat	chr11:3147650-3148250	11	3147650	3148250		rs11025599	4.574	rs734458	0.378984	5.037	4.53279	29	1	top1	0.14	7.1e-06	4.53279	5.82e-06
analysis/predict/WEIGHTS//chr11:32331750-32332250.wgt.RDat	chr11:32331750-32332250	11	32331750	32332250		rs763583	1.713	rs1022623	0.230842	3.064	-0.38095	28	1	top1.as	0.2389	0.0067	-0.45238	0.651
analysis/predict/WEIGHTS//chr11:32912350-32912900.wgt.RDat	chr11:32912350-32912900	11	32912350	32912900		rs2746036	4.763	rs17756284	0.065663	-0.804	0.84874	13	1	top1.qtl	0.116	3.7e-05	-0.84874	0.396
analysis/predict/WEIGHTS//chr11:33085950-33086400.wgt.RDat	chr11:33085950-33086400	11	33085950	33086400		rs2273549	2.371	rs11032136	-0.008971	3.392	2.3429	31	4	lasso	0.1465	0.014	2.2959	0.0217
analysis/predict/WEIGHTS//chr11:34352950-34353250.wgt.RDat	chr11:34352950-34353250	11	34352950	34353250		rs742634	-3.345	rs1267466	0.428038	2.378	2.4127	34	1	top1	0.428	0.0065	2.4127	0.0158
analysis/predict/WEIGHTS//chr11:34460500-34460900.wgt.RDat	chr11:34460500-34460900	11	34460500	34460900		rs7131473	-3.095	rs7131473	0.087352	-3.528	-3.09474	53	1	top1.as	0.181	0.0032	2.25843	0.0239
analysis/predict/WEIGHTS//chr11:34655200-34655650.wgt.RDat	chr11:34655200-34655650	11	34655200	34655650		rs286925	3.353	rs7113572	-0.030251	-2.315	0.53237	35	1	top1.qtl	0.04	0.012	0.7191	0.472
analysis/predict/WEIGHTS//chr11:34661000-34662300.wgt.RDat	chr11:34661000-34662300	11	34661000	34662300		rs286925	3.353	rs3751074	-0.02305	-2.175	0.14894	40	1	top1.as	0.231	0.0018	2.01562	0.0438
analysis/predict/WEIGHTS//chr11:34676300-34676950.wgt.RDat	chr11:34676300-34676950	11	34676300	34676950		rs286896	2.272	rs286885	0.232968	-4.628	1.33333	35	1	top1	0.082	0.00052	-1.33333	0.182
analysis/predict/WEIGHTS//chr11:34698200-34698600.wgt.RDat	chr11:34698200-34698600	11	34698200	34698600		rs286896	2.272	rs2123652	-0.040735	-2.863	1.6621	26	4	lasso.plasma	0.041	0.011	-0.93242	0.351
analysis/predict/WEIGHTS//chr11:34937650-34938350.wgt.RDat	chr11:34937650-34938350	11	34937650	34938350		rs12283472	1.199	rs2956114	-0.011132	-2.443	0.93103	44	1	top1	0.074	0.00091	-0.93103	0.352
analysis/predict/WEIGHTS//chr11:34978900-34979600.wgt.RDat	chr11:34978900-34979600	11	34978900	34979600		rs7938962	1.227	rs2732557	0.448186	-5.881	-0.4086	13	1	top1.as	0.15	2.1e-06	0.4086	0.683
analysis/predict/WEIGHTS//chr11:35082850-35083900.wgt.RDat	chr11:35082850-35083900	11	35082850	35083900		rs12790065	2.161	rs675970	0.003896	-4.442	0.3929	33	3	lasso.plasma	0.076	0.0008	-0.28414	0.776
analysis/predict/WEIGHTS//chr11:356050-356300.wgt.RDat	chr11:356050-356300	11	356050	356300		rs7395907	-2.114	rs6421982	0.038563	3.235	1.78409	25	1	top1	0.049	0.0062	1.78409	0.0744
analysis/predict/WEIGHTS//chr11:35971600-35972000.wgt.RDat	chr11:35971600-35972000	11	35971600	35972000		rs263101	-1.88	rs263096	-0.090778	-2.723	-0.987	23	11	lasso.plasma	0.048	0.0066	0.28302	0.777
analysis/predict/WEIGHTS//chr11:35974600-35975050.wgt.RDat	chr11:35974600-35975050	11	35974600	35975050		rs263101	-1.88	rs263095	0.040118	-3.056	-0.4444	23	2	lasso.plasma	0.068	0.0015	-0.57316	0.567
analysis/predict/WEIGHTS//chr11:36339500-36340100.wgt.RDat	chr11:36339500-36340100	11	36339500	36340100		rs4290197	1.829	rs1005985	-0.033202	1.52	0.68696	28	1	top1.qtl	0.046	0.0078	0.86905	0.385
analysis/predict/WEIGHTS//chr11:36651850-36652600.wgt.RDat	chr11:36651850-36652600	11	36651850	36652600		rs3758874	-0.78	rs12271660	0.113621	-1.312	0.64429	24	1	top1.as	0.4734	0.0037	0.59731	0.55
analysis/predict/WEIGHTS//chr11:37109600-37110250.wgt.RDat	chr11:37109600-37110250	11	37109600	37110250		rs746517	2.577	rs1567682	0.307618	-2.092	1.32673	32	1	top1.qtl	0.049	0.0062	0.35114	0.725
analysis/predict/WEIGHTS//chr11:39729200-39729700.wgt.RDat	chr11:39729200-39729700	11	39729200	39729700		rs17728870	-2.372	rs1676681	0.006337	1.561	2.32407	30	1	top1.qtl	0.039	0.013	-0.19565	0.845
analysis/predict/WEIGHTS//chr11:39753450-39754100.wgt.RDat	chr11:39753450-39754100	11	39753450	39754100		rs1676681	2.324	rs12362542	0.001601	-2.049	0.5556	31	18	lasso.plasma	0.1	9.3e-05	0.11238	0.911
analysis/predict/WEIGHTS//chr11:39798500-39799050.wgt.RDat	chr11:39798500-39799050	11	39798500	39799050		rs12223410	2.298	rs2089473	0.313008	-6.787	-0.36283	33	1	top1.qtl	0.31	2.9e-12	0.33628	0.737
analysis/predict/WEIGHTS//chr11:40614400-40615050.wgt.RDat	chr11:40614400-40615050	11	40614400	40615050		rs16934985	2.233	rs11035946	0.176708	-4.197	-0.7033	23	1	top1	0.076	0.00083	0.7033	0.482
analysis/predict/WEIGHTS//chr11:41955550-41956100.wgt.RDat	chr11:41955550-41956100	11	41955550	41956100		rs11036629	-0.693	rs7939620	0.227072	-3.586	0.07619	21	1	top1	0.046	0.0076	-0.07619	0.939
analysis/predict/WEIGHTS//chr11:42331950-42332700.wgt.RDat	chr11:42331950-42332700	11	42331950	42332700		rs7480538	-1.038	rs4373908	0.212143	-5.539	-0.59036	31	1	top1.as	0.14	6.2e-06	0.48193	0.63
analysis/predict/WEIGHTS//chr11:42520300-42521100.wgt.RDat	chr11:42520300-42521100	11	42520300	42521100		rs6485317	1.881	rs12279506	-0.033819	3.621	0.3431	23	6	lasso.plasma	0.065	0.0018	0.82092	0.412
analysis/predict/WEIGHTS//chr11:42845550-42846100.wgt.RDat	chr11:42845550-42846100	11	42845550	42846100		rs7102932	1.931	rs10837943	-0.047392	-2.277	0.7351	32	9	lasso.as	0.4958	0.00014	-0.4924	0.622
analysis/predict/WEIGHTS//chr11:42868350-42868800.wgt.RDat	chr11:42868350-42868800	11	42868350	42868800		rs11037114	1.964	rs7117480	0.288966	-5.772	-0.38182	41	1	top1	0.17	3.9e-07	0.38182	0.703
analysis/predict/WEIGHTS//chr11:43890000-43890900.wgt.RDat	chr11:43890000-43890900	11	43890000	43890900		rs1914771	-2.245	rs1914771	-0.021621	-2.213	-2.24476	37	1	top1.qtl	0.056	0.0035	1.69149	0.0907
analysis/predict/WEIGHTS//chr11:43916000-43916650.wgt.RDat	chr11:43916000-43916650	11	43916000	43916650		rs7116503	-2.215	rs10838197	0.170843	4.722	1.71277	30	1	top1.qtl	0.24	0.001	1.8172	0.0692
analysis/predict/WEIGHTS//chr11:44230400-44231150.wgt.RDat	chr11:44230400-44231150	11	44230400	44231150		rs16937862	0.723	rs4755233	-0.028944	-2.358	0.33735	14	1	top1.qtl	0.045	0.0082	-0.33735	0.736
analysis/predict/WEIGHTS//chr11:45000250-45001200.wgt.RDat	chr11:45000250-45001200	11	45000250	45001200		rs2902421	-1.728	rs4755303	0.241187	-1.547	-0.40909	26	1	top1.qtl	0.044	0.0093	0.05208	0.958
analysis/predict/WEIGHTS//chr11:45297450-45297750.wgt.RDat	chr11:45297450-45297750	11	45297450	45297750		rs12362444	3.938	rs12362444	0.054018	-3.273	3.9383	21	7	lasso.plasma	0.0569	0.0034	-2.79132	0.00525
analysis/predict/WEIGHTS//chr11:45870000-45870450.wgt.RDat	chr11:45870000-45870450	11	45870000	45870450		rs11038695	-1.459	rs10838524	0.28785	-4.931	0.23171	14	1	top1.as	0.133	1.1e-05	-0.23171	0.817
analysis/predict/WEIGHTS//chr11:4627350-4628200.wgt.RDat	chr11:4627350-4628200	11	4627350	4628200		rs7128702	-1.326	rs2231963	0.259364	4.875	-1.01163	28	1	top1.as	0.493	0.0003	-1.01163	0.312
analysis/predict/WEIGHTS//chr11:46721900-46722650.wgt.RDat	chr11:46721900-46722650	11	46721900	46722650		rs3136456	-2.759	rs8914	0.252076	1.036	2.42424	13	1	top1.as	0.293	0.0037	0.62921	0.529
analysis/predict/WEIGHTS//chr11:46803850-46804750.wgt.RDat	chr11:46803850-46804750	11	46803850	46804750		rs11038990	2.344	rs7928445	0.373217	-2.765	-0.25175	15	1	top1.qtl	0.7308	5.9e-05	-2.34351	0.0191
analysis/predict/WEIGHTS//chr11:4721550-4722250.wgt.RDat	chr11:4721550-4722250	11	4721550	4722250		rs7480497	-3.439	rs10500614	0.198277	4.822	-3.2705	36	3	lasso.plasma	0.1	0.00011	-3.22784	0.00125
analysis/predict/WEIGHTS//chr11:47281500-47282150.wgt.RDat	chr11:47281500-47282150	11	47281500	47282150		rs11039149	3.648	rs7114704	-0.018598	2.74	-0.28221	27	1	top1	0.04	0.013	-0.28221	0.778
analysis/predict/WEIGHTS//chr11:47447900-47448450.wgt.RDat	chr11:47447900-47448450	11	47447900	47448450		rs2293576	4.847	rs4237544	-0.062428	-2.436	-1.10112	19	1	top1.as	0.438	0.0042	1.10112	0.271
analysis/predict/WEIGHTS//chr11:4748250-4749100.wgt.RDat	chr11:4748250-4749100	11	4748250	4749100		rs10836495	-3.4	rs7952595	-0.018564	2.377	-2.61856	33	1	top1	0.037	0.015	-2.61856	0.00883
analysis/predict/WEIGHTS//chr11:47788900-47789300.wgt.RDat	chr11:47788900-47789300	11	47788900	47789300		rs7927445	4.067	rs6485774	-0.052555	-1.558	0.16667	14	1	top1.as	0.353	0.0034	-0.16667	0.868
analysis/predict/WEIGHTS//chr11:4820100-4820500.wgt.RDat	chr11:4820100-4820500	11	4820100	4820500		rs4910686	-2.058	rs2053116	0.073695	-5.145	-1.06977	39	1	top1.qtl	0.179	2.7e-07	1.06977	0.285
analysis/predict/WEIGHTS//chr11:48899000-48899450.wgt.RDat	chr11:48899000-48899450	11	48899000	48899450		rs11040106	-0.313	rs11040106	0.790981	2.545	-0.31325	2	1	top1.as	0.7971	1.4e-05	-0.31325	0.754
analysis/predict/WEIGHTS//chr11:49499150-49499600.wgt.RDat	chr11:49499150-49499600	11	49499150	49499600		rs12222221	-2.954	rs7951980	0.142774	1.407	-2.91503	8	1	top1.as	0.037	0.015	2.91503	0.00356
analysis/predict/WEIGHTS//chr11:506400-507350.wgt.RDat	chr11:506400-507350	11	506400	507350		rs7117488	-0.964	rs7117488	0.133734	-3.15	-0.964	13	4	lasso.plasma	0.042	0.01	0.26621	0.79
analysis/predict/WEIGHTS//chr11:56306350-56306950.wgt.RDat	chr11:56306350-56306950	11	56306350	56306950		rs13377553	3.26	rs11228656	0.011899	1.986	-0.76829	30	1	top1.qtl	0.056	0.0037	0	1
analysis/predict/WEIGHTS//chr11:56483650-56484350.wgt.RDat	chr11:56483650-56484350	11	56483650	56484350		rs7121276	2.966	rs545457	0.083475	5.951	-1.34524	26	1	top1.qtl	0.25	7e-10	-1.34524	0.179
analysis/predict/WEIGHTS//chr11:56928700-56929400.wgt.RDat	chr11:56928700-56929400	11	56928700	56929400		rs3017313	-1.869	rs612948	0.745227	9.405	0.80723	29	1	top1.as	0.58	1.1e-26	0.80723	0.42
analysis/predict/WEIGHTS//chr11:5705950-5706500.wgt.RDat	chr11:5705950-5706500	11	5705950	5706500		rs11601507	-3.994	rs1498553	0.385088	3.505	-0.45	44	1	top1	0.385	0.0035	-0.45	0.653
analysis/predict/WEIGHTS//chr11:57529100-57529550.wgt.RDat	chr11:57529100-57529550	11	57529100	57529550		rs9420	-2.494	rs11570176	0.013449	1.48	2.1951	8	7	lasso	0.05	0.0059	0.7524	0.452
analysis/predict/WEIGHTS//chr11:57703300-57703950.wgt.RDat	chr11:57703300-57703950	11	57703300	57703950		rs2055855	-2.207	rs631015	0.361795	-3.89	-2.1739	16	4	lasso.as	0.478	5.9e-07	0.49088	0.624
analysis/predict/WEIGHTS//chr11:58792200-58793450.wgt.RDat	chr11:58792200-58793450	11	58792200	58793450		rs525589	-2.193	rs525589	0.057221	1.326	-2.19318	13	1	top1.as	0.2	0.00085	-1.25714	0.209
analysis/predict/WEIGHTS//chr11:60137950-60139000.wgt.RDat	chr11:60137950-60139000	11	60137950	60139000		rs12793970	1.647	rs17533662	0.072374	1.369	-0.93452	19	1	top1.as	0.2792	0.0047	-0.39773	0.691
analysis/predict/WEIGHTS//chr11:60144000-60144600.wgt.RDat	chr11:60144000-60144600	11	60144000	60144600		rs12793970	1.647	rs12793970	0.020848	-1.939	1.6471	21	4	lasso.plasma	0.27876	0.0023	-0.89891	0.369
analysis/predict/WEIGHTS//chr11:60392500-60393100.wgt.RDat	chr11:60392500-60393100	11	60392500	60393100		rs6591609	1.158	rs6591609	-0.090455	2.245	1.15789	13	1	top1	0.06	0.0028	1.15789	0.247
analysis/predict/WEIGHTS//chr11:60602100-60602900.wgt.RDat	chr11:60602100-60602900	11	60602100	60602900		rs7930400	1.753	rs2074422	0.015996	-1.776	-0.38835	36	1	top1	0.044	0.0087	0.38835	0.698
analysis/predict/WEIGHTS//chr11:60897300-60897850.wgt.RDat	chr11:60897300-60897850	11	60897300	60897850		rs666886	-2.601	rs3862667	0.011341	-1.574	-0.37113	22	1	top1.qtl	0.051	0.0055	0.37113	0.711
analysis/predict/WEIGHTS//chr11:61425100-61425550.wgt.RDat	chr11:61425100-61425550	11	61425100	61425550		rs7925523	3.114	rs2453712	0.067712	2.466	2.71942	11	1	top1.qtl	0.084	0.00046	2.71942	0.00654
analysis/predict/WEIGHTS//chr11:61560000-61560300.wgt.RDat	chr11:61560000-61560300	11	61560000	61560300		rs650436	-2.235	rs108499	-0.017645	-1.631	-1.0698	19	1	lasso	0.038	0.014	1.0698	0.285
analysis/predict/WEIGHTS//chr11:61944100-61944700.wgt.RDat	chr11:61944100-61944700	11	61944100	61944700		rs4963471	4.396	rs2232937	0.359682	-5.507	-2.9036	26	7	lasso.as	0.44	4.5e-06	4.20373	2.63e-05
analysis/predict/WEIGHTS//chr11:61947300-61948100.wgt.RDat	chr11:61947300-61948100	11	61947300	61948100		rs4963471	4.396	rs6591695	-0.018356	2.732	0.70588	30	1	top1.qtl	0.053	0.0048	0.41727	0.676
analysis/predict/WEIGHTS//chr11:61953600-61954200.wgt.RDat	chr11:61953600-61954200	11	61953600	61954200		rs4963471	4.396	rs3781966	0.007173	3.572	-0.84524	30	1	top1.qtl	0.067	0.0016	-1.30435	0.192
analysis/predict/WEIGHTS//chr11:62003550-62004100.wgt.RDat	chr11:62003550-62004100	11	62003550	62004100		rs11230985	-2.635	rs11230985	0.121899	-1.328	-2.63542	24	1	top1	0.042	0.01	2.63542	0.0084
analysis/predict/WEIGHTS//chr11:62150050-62150700.wgt.RDat	chr11:62150050-62150700	11	62150050	62150700		rs17157227	3.794	rs11824690	-0.034233	-1.164	-1.94444	19	1	top1.qtl	0.046	0.0076	-0.37143	0.71
analysis/predict/WEIGHTS//chr11:62212650-62213150.wgt.RDat	chr11:62212650-62213150	11	62212650	62213150		rs17157266	-2.248	rs2509979	0.219716	-1.596	-0.4815	26	9	lasso.plasma	0.2967	0.012	0.79851	0.425
analysis/predict/WEIGHTS//chr11:62486050-62486450.wgt.RDat	chr11:62486050-62486450	11	62486050	62486450		rs12808085	0.85	rs576251	0.006903	-1.889	-0.6383	12	1	top1.as	0.041	0.012	0.58065	0.561
analysis/predict/WEIGHTS//chr11:62554500-62555100.wgt.RDat	chr11:62554500-62555100	11	62554500	62555100		rs7941706	-0.585	rs631310	-0.032974	1.181	0.08021	13	1	top1.qtl	0.044	0.0088	-0.09524	0.924
analysis/predict/WEIGHTS//chr11:64901850-64903100.wgt.RDat	chr11:64901850-64903100	11	64901850	64903100		rs9971407	2.374	rs1196045	0.146939	0.798	0.61905	18	1	top1	0.1469	0.0042	0.61905	0.536
analysis/predict/WEIGHTS//chr11:65559200-65559500.wgt.RDat	chr11:65559200-65559500	11	65559200	65559500		rs12801731	-3.63	rs479844	-0.035075	-3.11	2.07407	29	1	top1	0.051	0.0054	-2.07407	0.0381
analysis/predict/WEIGHTS//chr11:65756600-65756850.wgt.RDat	chr11:65756600-65756850	11	65756600	65756850		rs747526	-2.282	rs655744	-0.05193	2.296	2	23	1	lasso	0.05	0.0058	1.7561	0.0791
analysis/predict/WEIGHTS//chr11:65891200-65891850.wgt.RDat	chr11:65891200-65891850	11	65891200	65891850		rs873491	1.765	rs564343	0.045572	5.398	0.30121	10	1	top1.qtl	0.278	4.9e-11	0.3012	0.763
analysis/predict/WEIGHTS//chr11:65913500-65913900.wgt.RDat	chr11:65913500-65913900	11	65913500	65913900		rs17147371	1.765	rs801739	0.006122	-1.383	1.1	13	1	top1.as	0.291	0.01	-0.0814	0.935
analysis/predict/WEIGHTS//chr11:65956450-65957500.wgt.RDat	chr11:65956450-65957500	11	65956450	65957500		rs7946917	-0.667	rs2177054	0.040428	3.265	-0.6373	9	6	lasso	0.503	7.8e-08	-1.4501	0.147
analysis/predict/WEIGHTS//chr11:6633400-6634100.wgt.RDat	chr11:6633400-6634100	11	6633400	6634100		rs7109662	-1.107	rs12451	0.277636	1.645	-0.37113	25	1	top1	0.278	0.012	-0.37113	0.711
analysis/predict/WEIGHTS//chr11:66645000-66645500.wgt.RDat	chr11:66645000-66645500	11	66645000	66645500		rs4500496	-2.042	rs10896139	0.120948	-1.281	-0.90217	12	1	top1.as	0.2384	0.015	1.29412	0.196
analysis/predict/WEIGHTS//chr11:67895650-67896400.wgt.RDat	chr11:67895650-67896400	11	67895650	67896400		rs2512623	-2.744	rs1547889	0.023346	-1.062	-1.81443	11	1	top1.qtl	0.048	0.0067	1.81443	0.0696
analysis/predict/WEIGHTS//chr11:67905250-67906300.wgt.RDat	chr11:67905250-67906300	11	67905250	67906300		rs2512623	-2.744	rs1547889	0.179901	0.843	-1.81443	13	1	top1.as	0.3537	7.5e-05	-2.7439	0.00607
analysis/predict/WEIGHTS//chr11:68303300-68303850.wgt.RDat	chr11:68303300-68303850	11	68303300	68303850		rs7925275	1.362	rs11228269	0.170736	4.619	1.2283	19	3	lasso.plasma	0.093	0.00022	1.06634	0.286
analysis/predict/WEIGHTS//chr11:68624800-68625400.wgt.RDat	chr11:68624800-68625400	11	68624800	68625400		rs1249528	4	rs3019594	0.097465	-2.485	-0.15714	15	1	top1.as	0.042	0.011	-4	6.33e-05
analysis/predict/WEIGHTS//chr11:68842850-68843350.wgt.RDat	chr11:68842850-68843350	11	68842850	68843350		rs2305498	6.82	rs2376558	-0.061955	1.311	-0.87894	22	1	top1.qtl	0.3868	0.0045	-1.28605	0.198
analysis/predict/WEIGHTS//chr11:68985200-68985700.wgt.RDat	chr11:68985200-68985700	11	68985200	68985700		rs7130881	20.838	rs7939250	0.611261	-6.265	-19.9494	25	2	lasso.as	0.3	7.4e-12	17.7259	2.65e-70
analysis/predict/WEIGHTS//chr11:69489850-69490350.wgt.RDat	chr11:69489850-69490350	11	69489850	69490350		rs3212891	3.432	rs6606651	0.201417	2.029	-1.17483	15	1	top1.as	0.4774	0.00041	-1.17483	0.24
analysis/predict/WEIGHTS//chr11:70134550-70135000.wgt.RDat	chr11:70134550-70135000	11	70134550	70135000		rs546502	-2.644	rs6592522	-0.066995	-5.753	1.3492	13	7	lasso.plasma	0.277	5.4e-11	-1.69329	0.0904
analysis/predict/WEIGHTS//chr11:71498050-71498550.wgt.RDat	chr11:71498050-71498550	11	71498050	71498550		rs7126933	0.918	rs10898585	0.096432	-5.542	0.81928	3	1	top1	0.226	4.9e-09	-0.81928	0.413
analysis/predict/WEIGHTS//chr11:71543850-71544300.wgt.RDat	chr11:71543850-71544300	11	71543850	71544300		rs7107929	1.14	rs11235093	-0.033008	-3.605	0.94186	4	1	top1.qtl	0.179	2.5e-07	-1	0.317
analysis/predict/WEIGHTS//chr11:71751550-71752550.wgt.RDat	chr11:71751550-71752550	11	71751550	71752550		rs1057992	0.858	rs949326	-0.024905	-0.527	0.48387	17	1	top1.qtl	0.043	0.0096	-0.48387	0.628
analysis/predict/WEIGHTS//chr11:7370250-7370850.wgt.RDat	chr11:7370250-7370850	11	7370250	7370850		rs1487853	2.482	rs2346818	-0.037441	-3.621	-0.72727	25	1	top1.qtl	0.082	0.00052	0.72727	0.467
analysis/predict/WEIGHTS//chr11:74359400-74359900.wgt.RDat	chr11:74359400-74359900	11	74359400	74359900		rs7932922	-2.198	rs11236180	0.263673	3.922	1.4444	28	2	lasso	0.301	0.0018	1.4444	0.149
analysis/predict/WEIGHTS//chr11:74694650-74695650.wgt.RDat	chr11:74694650-74695650	11	74694650	74695650		rs681566	-1.207	rs7115499	-0.006194	2.276	0.2115	18	5	lasso.as	0.2039	0.0018	0.32041	0.749
analysis/predict/WEIGHTS//chr11:75083100-75084000.wgt.RDat	chr11:75083100-75084000	11	75083100	75084000		rs12289289	-1.256	rs12289289	0.013641	1.499	-1.25625	20	1	top1	0.056	0.0036	-1.25625	0.209
analysis/predict/WEIGHTS//chr11:75110450-75110750.wgt.RDat	chr11:75110450-75110750	11	75110450	75110750		rs4348932	1.72	rs532751	-0.046225	-2.769	0.1042	17	9	lasso	0.068	0.0015	0.2068	0.836
analysis/predict/WEIGHTS//chr11:75450600-75451400.wgt.RDat	chr11:75450600-75451400	11	75450600	75451400		rs11236511	-1.392	rs1219538	0.183185	-2.027	0.9157	29	2	lasso.as	0.4868	0.001	-0.9759	0.329
analysis/predict/WEIGHTS//chr11:7559650-7560550.wgt.RDat	chr11:7559650-7560550	11	7559650	7560550		rs12791447	3.162	rs12791447	0.008615	-3.349	3.1623	32	10	lasso.plasma	0.04	0.012	-0.69878	0.485
analysis/predict/WEIGHTS//chr11:7563850-7564300.wgt.RDat	chr11:7563850-7564300	11	7563850	7564300		rs12791447	3.162	rs7102169	-0.073427	-2.083	-2.87654	38	1	top1.as	0.4247	0.0067	2.87654	0.00402
analysis/predict/WEIGHTS//chr11:76555900-76556500.wgt.RDat	chr11:76555900-76556500	11	76555900	76556500		rs12785994	1.701	rs1225147	-0.052818	-3.614	0.3404	24	12	lasso.plasma	0.12	2.8e-05	-0.48977	0.624
analysis/predict/WEIGHTS//chr11:7656600-7657550.wgt.RDat	chr11:7656600-7657550	11	7656600	7657550		rs11603007	-4.429	rs4372441	0.083128	-3.697	0.52083	42	1	top1.qtl	0.1656	0.0013	-0.52083	0.602
analysis/predict/WEIGHTS//chr11:76566450-76567050.wgt.RDat	chr11:76566450-76567050	11	76566450	76567050		rs12785994	1.701	rs12785994	-0.060679	2.282	1.7006	26	1	top1.qtl	0.049	0.0061	1.7006	0.089
analysis/predict/WEIGHTS//chr11:76673950-76674600.wgt.RDat	chr11:76673950-76674600	11	76673950	76674600		rs12797610	1.427	rs7942574	-0.071429	2.992	0.19565	7	1	top1.qtl	0.091	0.00026	0.19565	0.845
analysis/predict/WEIGHTS//chr11:76746550-76748000.wgt.RDat	chr11:76746550-76748000	11	76746550	76748000		rs11827049	1.064	rs10899345	0.186154	6.424	0.01075	25	1	top1	0.2	5.3e-08	0.01075	0.991
analysis/predict/WEIGHTS//chr11:76771900-76772750.wgt.RDat	chr11:76771900-76772750	11	76771900	76772750		rs11237066	0.894	rs7926995	-0.000243	-2.981	0.77174	20	1	top1.qtl	0.0505	0.0055	-0.56701	0.571
analysis/predict/WEIGHTS//chr11:77085550-77086250.wgt.RDat	chr11:77085550-77086250	11	77085550	77086250		rs2844336	-1.405	rs2298793	0.147878	-5.542	-0.7907	12	2	lasso	0.21	1.7e-08	0.8394	0.401
analysis/predict/WEIGHTS//chr11:77226650-77227000.wgt.RDat	chr11:77226650-77227000	11	77226650	77227000		rs6592725	2.667	rs7109180	0.093714	-3.724	0.32558	15	1	top1	0.077	0.00075	-0.32558	0.745
analysis/predict/WEIGHTS//chr11:77772100-77772550.wgt.RDat	chr11:77772100-77772550	11	77772100	77772550		rs657277	-1.631	rs657277	-0.009074	2.084	-1.63063	20	1	top1.as	0.185	0.013	0.17284	0.863
analysis/predict/WEIGHTS//chr11:77809800-77811950.wgt.RDat	chr11:77809800-77811950	11	77809800	77811950		rs694138	-1.518	rs2845556	0.34334	7.43	1.0241	25	1	top1.qtl	0.37	2.8e-09	1.0241	0.306
analysis/predict/WEIGHTS//chr11:78237550-78237850.wgt.RDat	chr11:78237550-78237850	11	78237550	78237850		rs7125327	0.575	rs10899545	-0.075991	-0.419	-0.2549	12	1	top1	0.052	0.0051	0.2549	0.799
analysis/predict/WEIGHTS//chr11:78285700-78286000.wgt.RDat	chr11:78285700-78286000	11	78285700	78286000		rs12285681	-1.597	rs12285681	-0.062778	-2.306	-1.5975	19	13	lasso.as	0.3504	0.0093	0.80269	0.422
analysis/predict/WEIGHTS//chr11:78512200-78513650.wgt.RDat	chr11:78512200-78513650	11	78512200	78513650		rs2511829	-2.2	rs563384	0.032324	1.488	0.47541	33	1	top1.as	0.1883	0.0048	1.08333	0.279
analysis/predict/WEIGHTS//chr11:79397950-79398600.wgt.RDat	chr11:79397950-79398600	11	79397950	79398600		rs10899669	-1.364	rs12282252	0.050225	-2.024	1.00877	26	1	top1.qtl	0.2361	0.011	-1.07937	0.28
analysis/predict/WEIGHTS//chr11:79505800-79506550.wgt.RDat	chr11:79505800-79506550	11	79505800	79506550		rs2663205	2.306	rs1944951	-0.041697	3.721	-0.888	25	1	top1.qtl	0.125	1.9e-05	-0.888	0.375
analysis/predict/WEIGHTS//chr11:80436100-80436700.wgt.RDat	chr11:80436100-80436700	11	80436100	80436700		rs11232307	-3.036	rs11601312	0.270084	5.547	2.1529	16	7	lasso.plasma	0.21	1.4e-08	1.65806	0.0973
analysis/predict/WEIGHTS//chr11:80494400-80495000.wgt.RDat	chr11:80494400-80495000	11	80494400	80495000		rs1398450	-3.349	rs11232335	0.007625	-1.696	-1.85057	18	1	top1.qtl	0.037	0.015	1.79775	0.0722
analysis/predict/WEIGHTS//chr11:80610350-80611000.wgt.RDat	chr11:80610350-80611000	11	80610350	80611000		rs10897694	-2.296	rs11232399	0.005257	4.152	1.9753	23	2	lasso.as	0.096	0.00018	2.07074	0.0384
analysis/predict/WEIGHTS//chr11:80632050-80632950.wgt.RDat	chr11:80632050-80632950	11	80632050	80632950		rs2030073	2.469	rs11232404	0.049923	4.198	2.439	30	16	lasso.plasma	0.139	6.2e-06	1.65896	0.0971
analysis/predict/WEIGHTS//chr11:80652450-80652850.wgt.RDat	chr11:80652450-80652850	11	80652450	80652850		rs2030073	2.469	rs11232404	0.240787	4.219	2.439	22	14	lasso.plasma	0.087	0.00035	2.01254	0.0442
analysis/predict/WEIGHTS//chr11:81679250-81679800.wgt.RDat	chr11:81679250-81679800	11	81679250	81679800		rs12806769	1.079	rs1955011	0.28184	-1.608	-0.2892	18	15	lasso	0.065	0.0018	-0.819	0.413
analysis/predict/WEIGHTS//chr11:81716950-81717800.wgt.RDat	chr11:81716950-81717800	11	81716950	81717800		rs601130	-1.038	rs693931	0.035655	-3.115	0.05208	14	1	top1.as	0.063	0.0021	-0.05208	0.958
analysis/predict/WEIGHTS//chr11:82717950-82718500.wgt.RDat	chr11:82717950-82718500	11	82717950	82718500		rs10431152	2.544	rs12808296	0.045999	-4.245	1.67073	14	1	top1	0.133	1e-05	-1.67073	0.0948
analysis/predict/WEIGHTS//chr11:82797900-82798600.wgt.RDat	chr11:82797900-82798600	11	82797900	82798600		rs3763812	2.296	rs12365527	-0.030661	2.884	-0.21649	23	1	top1.qtl	0.056	0.0036	0.7282	0.466
analysis/predict/WEIGHTS//chr11:82803700-82804450.wgt.RDat	chr11:82803700-82804450	11	82803700	82804450		rs3763812	2.296	rs11233462	-0.010153	-3.456	-1.11765	21	1	top1	0.098	0.00016	1.11765	0.264
analysis/predict/WEIGHTS//chr11:82850050-82851050.wgt.RDat	chr11:82850050-82851050	11	82850050	82851050		rs4944429	1.488	rs12223439	-0.008731	2.37	1.34524	10	1	top1	0.0532	0.0045	1.34524	0.179
analysis/predict/WEIGHTS//chr11:82996850-82997650.wgt.RDat	chr11:82996850-82997650	11	82996850	82997650		rs10898092	-1.679	rs673021	-0.0473	-1.811	0	10	6	lasso	0.041	0.011	1.7976	0.0722
analysis/predict/WEIGHTS//chr11:83099750-83100600.wgt.RDat	chr11:83099750-83100600	11	83099750	83100600		rs2995907	-0.908	rs1943737	-0.030993	0.917	0.05814	9	1	top1.qtl	0.0376	0.015	0.05814	0.954
analysis/predict/WEIGHTS//chr11:83204950-83205350.wgt.RDat	chr11:83204950-83205350	11	83204950	83205350		rs12288797	1.173	rs919667	-0.0578	2.561	0.1512	19	2	lasso.plasma	0.046	0.0077	0.0583	0.954
analysis/predict/WEIGHTS//chr11:84161150-84161800.wgt.RDat	chr11:84161150-84161800	11	84161150	84161800		rs533364	2.202	rs10898236	-0.03497	2.749	-1.6667	17	7	lasso	0.043	0.0097	-0.7114	0.477
analysis/predict/WEIGHTS//chr11:842450-843000.wgt.RDat	chr11:842450-843000	11	842450	843000		rs1803956	-1.793	rs6597977	0.013664	-0.988	0.7	24	1	top1.qtl	0.092	0.00024	-0.84685	0.397
analysis/predict/WEIGHTS//chr11:84581550-84581950.wgt.RDat	chr11:84581550-84581950	11	84581550	84581950		rs1943725	-1.562	rs1943723	-0.049366	2.784	1.1625	27	2	lasso.plasma	0.064	0.002	0.38033	0.704
analysis/predict/WEIGHTS//chr11:86258700-86259350.wgt.RDat	chr11:86258700-86259350	11	86258700	86259350		rs17149180	-2.155	rs11234689	0.13019	-5.037	0.46067	32	1	top1.as	0.143	4.6e-06	-0.46067	0.645
analysis/predict/WEIGHTS//chr11:86410300-86411000.wgt.RDat	chr11:86410300-86411000	11	86410300	86411000		rs2512987	-2.061	rs2512983	-0.015299	2.881	0.67778	33	1	top1.qtl	0.0889	0.0003	-1.51705	0.129
analysis/predict/WEIGHTS//chr11:86666700-86667100.wgt.RDat	chr11:86666700-86667100	11	86666700	86667100		rs10898561	-3.264	rs3740664	0.326211	2.586	0.67857	17	1	top1	0.3262	0.012	0.67857	0.497
analysis/predict/WEIGHTS//chr11:86833750-86834450.wgt.RDat	chr11:86833750-86834450	11	86833750	86834450		rs564932	-1.256	rs676384	0.127585	-3.11	0.48837	29	1	top1	0.12758	0.004	-0.48837	0.625
analysis/predict/WEIGHTS//chr11:86839300-86839950.wgt.RDat	chr11:86839300-86839950	11	86839300	86839950		rs564932	-1.256	rs10792910	0.112686	-3.328	-0.13699	27	1	top1.as	0.175	0.014	0.13699	0.891
analysis/predict/WEIGHTS//chr11:89413100-89413450.wgt.RDat	chr11:89413100-89413450	11	89413100	89413450		rs931394	1.75	rs10047486	0.211169	-4.794	-0.53571	6	1	top1.qtl	0.14	8.2e-06	0.53571	0.592
analysis/predict/WEIGHTS//chr11:9124850-9125450.wgt.RDat	chr11:9124850-9125450	11	9124850	9125450		rs11606260	3.472	rs963167	0.000312	2.621	-1.338	22	20	lasso	0.08963	0.012	1.3899	0.165
analysis/predict/WEIGHTS//chr11:91341650-91342450.wgt.RDat	chr11:91341650-91342450	11	91341650	91342450		rs12291148	0.615	rs3895036	0.180556	4.362	-0.4588	16	6	lasso.plasma	0.204	0.00025	-0.44213	0.658
analysis/predict/WEIGHTS//chr11:92467250-92468200.wgt.RDat	chr11:92467250-92468200	11	92467250	92468200		rs1791569	1.198	rs2244078	0.2158	3.91	-0.91228	21	1	top1	0.067	0.0016	-0.91228	0.362
analysis/predict/WEIGHTS//chr11:92570550-92571200.wgt.RDat	chr11:92570550-92571200	11	92570550	92571200		rs3843605	1.028	rs4753068	0.229591	-4.706	-0.01176	19	1	top1.as	0.12	3.2e-05	0.01176	0.991
analysis/predict/WEIGHTS//chr11:93066100-93066600.wgt.RDat	chr11:93066100-93066600	11	93066100	93066600		rs10831027	1.301	rs1003072	-0.027751	-1.801	-0.19333	19	1	top1.qtl	0.096	0.00018	0.19333	0.847
analysis/predict/WEIGHTS//chr11:93107400-93107950.wgt.RDat	chr11:93107400-93107950	11	93107400	93107950		rs2925355	0.99	rs2925355	0.382683	-3.374	0.9901	23	8	lasso.plasma	0.075	0.00085	-0.13421	0.893
analysis/predict/WEIGHTS//chr11:93230350-93230750.wgt.RDat	chr11:93230350-93230750	11	93230350	93230750		rs2608280	1.125	rs2045459	-0.040348	0.701	-0.77647	32	1	top1.qtl	0.048	0.0068	0.60274	0.547
analysis/predict/WEIGHTS//chr11:94441550-94442400.wgt.RDat	chr11:94441550-94442400	11	94441550	94442400		rs4408268	-1.345	rs1815907	0.01448	-1.583	0.73203	21	1	top1.qtl	0.039	0.013	1.13793	0.255
analysis/predict/WEIGHTS//chr11:95378300-95378850.wgt.RDat	chr11:95378300-95378850	11	95378300	95378850		rs16922306	2.477	rs17799724	-0.052685	1.01	-0.82119	22	1	top1	0.056	0.0035	-0.82119	0.412
analysis/predict/WEIGHTS//chr11:95631900-95632350.wgt.RDat	chr11:95631900-95632350	11	95631900	95632350		rs693172	1.087	rs12417555	-0.041655	3.462	-0.72951	18	1	top1.qtl	0.04	0.012	-0.74242	0.458
analysis/predict/WEIGHTS//chr11:95652550-95653250.wgt.RDat	chr11:95652550-95653250	11	95652550	95653250		rs693172	1.087	rs12417555	0.594018	6.155	-0.72951	15	1	top1.as	0.17	3.7e-07	-0.73984	0.459
analysis/predict/WEIGHTS//chr11:95926400-95927450.wgt.RDat	chr11:95926400-95927450	11	95926400	95927450		rs4090736	-2.372	rs4753743	0.033002	2.137	-1.07955	43	1	top1.qtl	0.037	0.015	-1.07955	0.28
analysis/predict/WEIGHTS//chr11:96624900-96625500.wgt.RDat	chr11:96624900-96625500	11	96624900	96625500		rs11215338	2.469	rs1439528	0.183854	2.29	-0.8046	15	1	top1.as	0.1872	0.014	-0.8046	0.421
analysis/predict/WEIGHTS//chr11:97927650-97928150.wgt.RDat	chr11:97927650-97928150	11	97927650	97928150		rs2105597	1.42	rs2509860	0.158546	2.717	-1.2553	28	20	lasso	0.37	0.012	-1.6812	0.0927
analysis/predict/WEIGHTS//chr11:99516600-99517250.wgt.RDat	chr11:99516600-99517250	11	99516600	99517250		rs10893622	-1.692	rs673798	0.264031	7.151	-0.7059	34	5	lasso.plasma	0.42	2.3e-17	-0.58633	0.558
analysis/predict/WEIGHTS//chr12:100093000-100093700.wgt.RDat	chr12:100093000-100093700	12	100093000	100093700		rs7975225	-1.989	rs11609104	0.0349	-3.168	-1.90722	19	1	top1	0.045	0.0083	1.90722	0.0565
analysis/predict/WEIGHTS//chr12:100095000-100095400.wgt.RDat	chr12:100095000-100095400	12	100095000	100095400		rs7975225	-1.989	rs7980447	-0.057786	-2.228	-1.7294	18	12	lasso.plasma	0.0948	0.00019	1.4055	0.16
analysis/predict/WEIGHTS//chr12:100413050-100413550.wgt.RDat	chr12:100413050-100413550	12	100413050	100413550		rs17396522	-1.452	rs7975540	-0.0552	-1.842	-1.3611	15	6	lasso	0.057	0.0033	-0.34052	0.733
analysis/predict/WEIGHTS//chr12:101693650-101694100.wgt.RDat	chr12:101693650-101694100	12	101693650	101694100		rs2607913	-1.565	rs4764641	-0.0574	3.355	-1.06195	16	1	top1.qtl	0.085	0.0004	-1.06195	0.288
analysis/predict/WEIGHTS//chr12:101998000-101998350.wgt.RDat	chr12:101998000-101998350	12	101998000	101998350		rs825067	-2.862	rs860360	0.251	-3.101	-1.48276	29	1	top1	0.2514	0.014	1.48276	0.138
analysis/predict/WEIGHTS//chr12:102242050-102242600.wgt.RDat	chr12:102242050-102242600	12	102242050	102242600		rs2373526	-2.284	rs4764823	-0.0385	1.478	0.15556	13	1	top1.qtl	0.05	0.0059	0.78723	0.431
analysis/predict/WEIGHTS//chr12:102285250-102285550.wgt.RDat	chr12:102285250-102285550	12	102285250	102285550		rs2176092	2.642	rs10778155	0.0327	-2.244	-1.98765	22	1	top1.as	0.237	0.008	-0.3125	0.755
analysis/predict/WEIGHTS//chr12:102285650-102286100.wgt.RDat	chr12:102285650-102286100	12	102285650	102286100		rs2176092	2.642	rs756534	0.0464	-5.764	-2.24691	22	1	top1	0.262	2.2e-10	2.24691	0.0246
analysis/predict/WEIGHTS//chr12:102416900-102417600.wgt.RDat	chr12:102416900-102417600	12	102416900	102417600		rs7311503	3.827	rs6539025	-0.0966	1.679	-0.36585	15	1	top1.as	0.48	0.01	-1.4375	0.151
analysis/predict/WEIGHTS//chr12:102896650-102898300.wgt.RDat	chr12:102896650-102898300	12	102896650	102898300		rs11111293	3.371	rs35767	0.243302	-4.077	0.80374	16	4	lasso.as	0.078	0.00067	-0.896468	0.37
analysis/predict/WEIGHTS//chr12:103012050-103012700.wgt.RDat	chr12:103012050-103012700	12	103012050	103012700		rs1350354	-1.963	rs7298152	-0.0553	2.529	-0.37895	19	1	top1.qtl	0.0435	0.0094	0.375	0.708
analysis/predict/WEIGHTS//chr12:103037550-103037950.wgt.RDat	chr12:103037550-103037950	12	103037550	103037950		rs833733	-2.447	rs2201521	0.123	3.291	-1.49383	22	1	top1.qtl	0.3384	0.0067	-1.49383	0.135
analysis/predict/WEIGHTS//chr12:103268500-103269100.wgt.RDat	chr12:103268500-103269100	12	103268500	103269100		rs2251897	-1.122	rs1722399	0.101	1.626	-0.6506	24	1	top1.qtl	0.12	4e-05	-0.92857	0.353
analysis/predict/WEIGHTS//chr12:103766650-103767650.wgt.RDat	chr12:103766650-103767650	12	103766650	103767650		rs17033809	1.789	rs11111539	-0.0508	1.523	0.02198	32	1	top1.as	0.319	0.0086	0.95238	0.341
analysis/predict/WEIGHTS//chr12:104323750-104324350.wgt.RDat	chr12:104323750-104324350	12	104323750	104324350		rs3794240	-1.794	rs1866069	0.0563	-2.465	1	38	1	top1.qtl	0.0553	0.0039	-1	0.317
analysis/predict/WEIGHTS//chr12:104613000-104614400.wgt.RDat	chr12:104613000-104614400	12	104613000	104614400		rs4445711	-1.33	rs12812451	0.313	1.771	-0.03252	20	1	top1	0.313	0.014	-0.03252	0.974
analysis/predict/WEIGHTS//chr12:104680500-104681100.wgt.RDat	chr12:104680500-104681100	12	104680500	104681100		rs4564401	-2.148	rs4964735	0.12	-2.158	0.48864	21	1	top1.qtl	0.0534	0.0044	0.73958	0.46
analysis/predict/WEIGHTS//chr12:105397200-105397900.wgt.RDat	chr12:105397200-105397900	12	105397200	105397900		rs11112304	-1.913	rs11112287	-0.0667	-1.064	-1.2	15	1	top1.qtl	0.054	0.0043	-0.21782	0.828
analysis/predict/WEIGHTS//chr12:106154800-106155450.wgt.RDat	chr12:106154800-106155450	12	106154800	106155450		rs1806477	-2.045	rs10861501	-0.0309	-1.885	1.89888	32	1	top1.as	0.1551	0.014	-0.95455	0.34
analysis/predict/WEIGHTS//chr12:106328000-106328550.wgt.RDat	chr12:106328000-106328550	12	106328000	106328550		rs1421463	-1.581	rs12815201	0.00488	1.119	1.13415	41	1	top1	0.0604	0.0026	1.13415	0.257
analysis/predict/WEIGHTS//chr12:106677850-106678400.wgt.RDat	chr12:106677850-106678400	12	106677850	106678400		rs10861567	2.128	rs1532586	0.411	-1.244	-0.27778	31	1	top1	0.41115	0.011	0.27778	0.781
analysis/predict/WEIGHTS//chr12:107450850-107451250.wgt.RDat	chr12:107450850-107451250	12	107450850	107451250		rs4081670	3.366	rs10778528	-0.0112	2.643	3.16049	10	1	top1.as	0.046	0.008	3.16049	0.00158
analysis/predict/WEIGHTS//chr12:10768150-10769450.wgt.RDat	chr12:10768150-10769450	12	10768150	10769450		rs2277410	1.554	rs1026442	-0.0154	-2.417	0.1	49	1	top1	0.038	0.014	-0.1	0.92
analysis/predict/WEIGHTS//chr12:10805900-10806600.wgt.RDat	chr12:10805900-10806600	12	10805900	10806600		rs2277410	1.554	rs7968536	0.0392	-2.292	-0.84	24	1	top1.as	0.1457	0.0036	-0.85227	0.394
analysis/predict/WEIGHTS//chr12:108080750-108081250.wgt.RDat	chr12:108080750-108081250	12	108080750	108081250		rs744266	-2.57	rs3782527	0.105	-3.089	0.5618	22	1	top1.as	0.3342	0.014	-1.98765	0.0469
analysis/predict/WEIGHTS//chr12:108159100-108159500.wgt.RDat	chr12:108159100-108159500	12	108159100	108159500		rs2160591	-2.1	rs3803120	0.002506	-2.79	1.82353	21	2	lasso.as	0.043	0.01	-0.959133	0.337
analysis/predict/WEIGHTS//chr12:10816350-10816900.wgt.RDat	chr12:10816350-10816900	12	10816350	10816900		rs10772350	1.33	rs16922945	0.0758	-3.577	-0.38235	23	1	top1.as	0.1206	0.012	0.80208	0.423
analysis/predict/WEIGHTS//chr12:10869850-10870250.wgt.RDat	chr12:10869850-10870250	12	10869850	10870250		rs1108542	2.026	rs4763577	-0.0995	1.608	0	27	1	top1.qtl	0.039	0.013	-1.67857	0.0932
analysis/predict/WEIGHTS//chr12:110009550-110010050.wgt.RDat	chr12:110009550-110010050	12	110009550	110010050		rs888192	4.444	rs7300998	0.0272	3.399	-3.5	21	1	top1.qtl	0.2031	0.0064	-3.5	0.000465
analysis/predict/WEIGHTS//chr12:110011050-110011700.wgt.RDat	chr12:110011050-110011700	12	110011050	110011700		rs888192	4.444	rs10850379	0.029	0.637	-2.7037	21	1	top1	0.079	0.00066	-2.7037	0.00686
analysis/predict/WEIGHTS//chr12:112211650-112211950.wgt.RDat	chr12:112211650-112211950	12	112211650	112211950		rs968529	-1.255	rs4646778	-0.0386	1.427	-0.53704	11	1	top1.as	0.2162	0.011	-0.5514	0.581
analysis/predict/WEIGHTS//chr12:113364250-113364750.wgt.RDat	chr12:113364250-113364750	12	113364250	113364750		rs3803057	-1.459	rs10735079	0.0925	-5.85	-0.4157	35	10	lasso	0.278	4.8e-11	1.81826	0.069
analysis/predict/WEIGHTS//chr12:113536200-113536750.wgt.RDat	chr12:113536200-113536750	12	113536200	113536750		rs1674122	2.455	rs1902955	0.153	1.718	-0.96739	31	1	top1.qtl	0.038	0.014	-0.96739	0.333
analysis/predict/WEIGHTS//chr12:114507250-114507750.wgt.RDat	chr12:114507250-114507750	12	114507250	114507750		rs1598978	-4.494	rs7953999	0.529	-5.146	3.65432	28	1	top1.as	0.58	1.2e-05	-3.5125	0.000444
analysis/predict/WEIGHTS//chr12:114993000-114993700.wgt.RDat	chr12:114993000-114993700	12	114993000	114993700		rs17678419	-3.692	rs7309078	-0.020968	-3.736	-0.0404	23	12	lasso.plasma	0.082	0.00051	-1.9479	0.0514
analysis/predict/WEIGHTS//chr12:115171650-115172150.wgt.RDat	chr12:115171650-115172150	12	115171650	115172150		rs2384478	-1.462	rs7975475	-0.0502	-2.183	0.30357	25	1	top1.qtl	0.037	0.015	-0.30357	0.761
analysis/predict/WEIGHTS//chr12:115648700-115649050.wgt.RDat	chr12:115648700-115649050	12	115648700	115649050		rs1473001	-2.784	rs4766758	0.298	-1.507	0.19186	40	1	top1	0.298	0.011	-0.19186	0.848
analysis/predict/WEIGHTS//chr12:115762500-115764150.wgt.RDat	chr12:115762500-115764150	12	115762500	115764150		rs12369212	2.917	rs11067544	-0.0146	-2.015	0.41765	26	1	top1.as	0.2144	0.0023	-2.91743	0.00353
analysis/predict/WEIGHTS//chr12:115934600-115935300.wgt.RDat	chr12:115934600-115935300	12	115934600	115935300		rs7980395	2.562	rs7971598	0.005916	-3.111	-1.7531	38	4	lasso.plasma	0.042	0.011	2.37475	0.0176
analysis/predict/WEIGHTS//chr12:116178350-116179050.wgt.RDat	chr12:116178350-116179050	12	116178350	116179050		rs2460488	2.371	rs11610288	-0.0235	3.27	1.5652	50	5	lasso	0.085	0.0004	1.02721	0.304
analysis/predict/WEIGHTS//chr12:116201700-116202250.wgt.RDat	chr12:116201700-116202250	12	116201700	116202250		rs1715583	-2.398	rs7965205	0.082	2.484	-2.10092	48	1	top1.qtl	0.067	0.0016	-2.10092	0.0356
analysis/predict/WEIGHTS//chr12:116255000-116255800.wgt.RDat	chr12:116255000-116255800	12	116255000	116255800		rs7977515	-2.851	rs708840	0.0921	-4.226	-1.04762	46	1	top1	0.072	0.0011	1.04762	0.295
analysis/predict/WEIGHTS//chr12:116842900-116843650.wgt.RDat	chr12:116842900-116843650	12	116842900	116843650		rs884576	1.635	rs17581242	0.186	-3.65	0.34783	26	1	top1	0.064	0.002	-0.34783	0.728
analysis/predict/WEIGHTS//chr12:116947150-116947700.wgt.RDat	chr12:116947150-116947700	12	116947150	116947700		rs11068058	2.614	rs10850652	0.238	-2.24	-2.05814	25	1	top1	0.2375	0.011	2.05814	0.0396
analysis/predict/WEIGHTS//chr12:117074200-117075350.wgt.RDat	chr12:117074200-117075350	12	117074200	117075350		rs4767430	1.784	rs12312305	0.000412	2.995	-1.33333	28	1	top1	0.05228	0.0048	-1.33333	0.182
analysis/predict/WEIGHTS//chr12:117471500-117471900.wgt.RDat	chr12:117471500-117471900	12	117471500	117471900		rs10774898	2.101	rs2291916	0.171	3.149	2.08989	15	1	top1.qtl	0.052	0.005	2.08989	0.0366
analysis/predict/WEIGHTS//chr12:117603150-117603600.wgt.RDat	chr12:117603150-117603600	12	117603150	117603600		rs2036311	-0.84	rs7487508	-0.0667	-2.866	-0.4898	24	1	top1.qtl	0.06	0.0028	0.4898	0.624
analysis/predict/WEIGHTS//chr12:117945250-117945900.wgt.RDat	chr12:117945250-117945900	12	117945250	117945900		rs12579847	-1.923	rs1093291	0.275	1.711	0.57895	16	1	top1	0.2746	0.0051	0.57895	0.563
analysis/predict/WEIGHTS//chr12:117956450-117957200.wgt.RDat	chr12:117956450-117957200	12	117956450	117957200		rs12579847	-1.923	rs1093291	-0.0249	2.425	0.57895	27	1	top1.qtl	0.04	0.013	0.57895	0.563
analysis/predict/WEIGHTS//chr12:118240600-118241500.wgt.RDat	chr12:118240600-118241500	12	118240600	118241500		rs479143	1.136	rs7301240	0.00351	2.988	0.71605	36	1	top1	0.0567	0.0035	0.71605	0.474
analysis/predict/WEIGHTS//chr12:118259100-118260050.wgt.RDat	chr12:118259100-118260050	12	118259100	118260050		rs2245557	1.597	rs10850906	0.176	3.562	-0.77333	39	1	top1	0.176	0.014	-0.77333	0.439
analysis/predict/WEIGHTS//chr12:118291350-118291850.wgt.RDat	chr12:118291350-118291850	12	118291350	118291850		rs11611577	1.786	rs2723281	0.354	-2.598	0.13131	33	1	top1.qtl	0.559	0.0027	-0.16049	0.872
analysis/predict/WEIGHTS//chr12:11836700-11837800.wgt.RDat	chr12:11836700-11837800	12	11836700	11837800		rs2856315	3.05	rs2541115	0.187	-3.851	1.86429	26	1	top1	0.061	0.0026	-1.86429	0.0623
analysis/predict/WEIGHTS//chr12:120367850-120368600.wgt.RDat	chr12:120367850-120368600	12	120367850	120368600		rs10849722	2.422	rs12582427	0.0891	-4.572	-0.122	14	11	lasso	0.087	0.00036	0.64667	0.518
analysis/predict/WEIGHTS//chr12:120755350-120755850.wgt.RDat	chr12:120755350-120755850	12	120755350	120755850		rs2522134	-0.91	rs1179368	0.362	1.487	0.25137	14	1	top1	0.362	0.0014	0.25137	0.802
analysis/predict/WEIGHTS//chr12:12209950-12210300.wgt.RDat	chr12:12209950-12210300	12	12209950	12210300		rs10845463	-2.517	rs10845459	0.332389	-6.041	-2.2125	33	7	lasso.plasma	0.22	7.4e-09	2.28079	0.0226
analysis/predict/WEIGHTS//chr12:122636150-122636750.wgt.RDat	chr12:122636150-122636750	12	122636150	122636750		rs4758680	-1.57	rs10847385	-0.0604	1.46	0.4381	29	1	top1.qtl	0.0481	0.0066	-0.93023	0.352
analysis/predict/WEIGHTS//chr12:122985250-122985850.wgt.RDat	chr12:122985250-122985850	12	122985250	122985850		rs7134381	2.393	rs12369179	-0.02415	-1.362	0.473	25	7	lasso.plasma	0.094	0.00021	-0.12942	0.897
analysis/predict/WEIGHTS//chr12:123143750-123144650.wgt.RDat	chr12:123143750-123144650	12	123143750	123144650		rs10847335	-2.262	rs11059100	0.025	-1.792	-2.16667	14	1	top1.as	0.175	0.0025	-0.49541	0.62
analysis/predict/WEIGHTS//chr12:123172600-123173450.wgt.RDat	chr12:123172600-123173450	12	123172600	123173450		rs10847452	-1.944	rs1798219	0.119	1.208	0.20536	8	1	top1.as	0.038	0.014	-0.48214	0.63
analysis/predict/WEIGHTS//chr12:123656350-123657000.wgt.RDat	chr12:123656350-123657000	12	123656350	123657000		rs1727293	0.756	rs1727309	0.0517	-4.133	-0.0082	20	1	top1.qtl	0.064	0.0019	0.0082	0.993
analysis/predict/WEIGHTS//chr12:123744300-123745300.wgt.RDat	chr12:123744300-123745300	12	123744300	123745300		rs10083067	0.813	rs10773000	0.012621	1.829	0.2778	14	3	lasso.plasma	0.0737	0.00096	0.2398	0.81
analysis/predict/WEIGHTS//chr12:123819900-123820600.wgt.RDat	chr12:123819900-123820600	12	123819900	123820600		rs10846514	0.804	rs7959415	0.0307	1.921	-0.03211	18	1	top1.qtl	0.069	0.0014	0.80435	0.421
analysis/predict/WEIGHTS//chr12:124844000-124845100.wgt.RDat	chr12:124844000-124845100	12	124844000	124845100		rs1268892	-3.95	rs1263990	-0.0185	1.423	0.13889	25	1	top1.qtl	0.07	0.0012	0.13889	0.89
analysis/predict/WEIGHTS//chr12:125205000-125205900.wgt.RDat	chr12:125205000-125205900	12	125205000	125205900		rs838853	-3.246	rs7980142	0.00472	-2.475	-0.24339	24	1	top1.as	0.4733	0.00089	0.24339	0.808
analysis/predict/WEIGHTS//chr12:125312200-125312850.wgt.RDat	chr12:125312200-125312850	12	125312200	125312850		rs11057853	-2.667	rs7967406	-0.0289	-4.084	-0.44186	31	1	top1	0.075	0.00087	0.44186	0.659
analysis/predict/WEIGHTS//chr12:125389200-125389650.wgt.RDat	chr12:125389200-125389650	12	125389200	125389650		rs4499094	-1.184	rs9988954	0.313	-1.142	-0.33333	16	1	top1	0.3133	0.0061	0.33333	0.739
analysis/predict/WEIGHTS//chr12:125398850-125399600.wgt.RDat	chr12:125398850-125399600	12	125398850	125399600		rs4499094	-1.184	rs7309653	-0.00622	-1.123	-0.41748	17	1	top1.qtl	0.109	6.6e-05	0.69512	0.487
analysis/predict/WEIGHTS//chr12:12585200-12585800.wgt.RDat	chr12:12585200-12585800	12	12585200	12585800		rs11054901	-2.486	rs11054901	-0.0146	-1.854	-2.4863	27	1	top1.qtl	0.051	0.0053	-1.39568	0.163
analysis/predict/WEIGHTS//chr12:126317350-126318100.wgt.RDat	chr12:126317350-126318100	12	126317350	126318100		rs10846986	-2.207	rs10846982	0.155	4.691	-1.56818	25	1	top1	0.079	0.00065	-1.56818	0.117
analysis/predict/WEIGHTS//chr12:126466100-126466800.wgt.RDat	chr12:126466100-126466800	12	126466100	126466800		rs225562	-0.905	rs225476	-0.023	2.87	0.79	40	1	top1.qtl	0.074	0.00096	0.79	0.43
analysis/predict/WEIGHTS//chr12:12658250-12658600.wgt.RDat	chr12:12658250-12658600	12	12658250	12658600		rs17312912	1.576	rs4763837	0.00237	-0.727	-0.47008	31	1	top1	0.0412	0.011	0.47008	0.638
analysis/predict/WEIGHTS//chr12:12759650-12760100.wgt.RDat	chr12:12759650-12760100	12	12759650	12760100		rs7132921	-2.547	rs2160971	0.0555	2.219	-1.94231	21	1	top1.qtl	0.054	0.0043	-1.94231	0.0521
analysis/predict/WEIGHTS//chr12:12927600-12928200.wgt.RDat	chr12:12927600-12928200	12	12927600	12928200		rs7974366	3.011	rs10744003	-0.0209	-0.927	0.63107	20	1	top1.qtl	0.077	0.00076	1.61739	0.106
analysis/predict/WEIGHTS//chr12:13006350-13006900.wgt.RDat	chr12:13006350-13006900	12	13006350	13006900		rs7138406	2.557	rs10845656	0.00643	-3.669	-2.42268	20	1	top1	0.0884	0.00031	2.42268	0.0154
analysis/predict/WEIGHTS//chr12:130076850-130077450.wgt.RDat	chr12:130076850-130077450	12	130076850	130077450		rs7135209	-1.819	rs155370	0.181	-4.297	0.73626	42	1	top1.qtl	0.084	0.00044	-1.03409	0.301
analysis/predict/WEIGHTS//chr12:13044100-13044650.wgt.RDat	chr12:13044100-13044650	12	13044100	13044650		rs10505770	2.556	rs756540	-0.0853	1.908	-1.77064	27	1	top1.qtl	0.05	0.0056	-1.77064	0.0766
analysis/predict/WEIGHTS//chr12:131410250-131410650.wgt.RDat	chr12:131410250-131410650	12	131410250	131410650		rs1405904	1.909	rs7133973	0.0477	-2.572	-1.32955	23	1	top1.qtl	0.05	0.0056	1.32955	0.184
analysis/predict/WEIGHTS//chr12:13179150-13179700.wgt.RDat	chr12:13179150-13179700	12	13179150	13179700		rs7978453	-3.145	rs6488578	0.0836	-3.813	-2.36792	25	1	top1.qtl	0.058	0.0032	2.36792	0.0179
analysis/predict/WEIGHTS//chr12:131997800-131998250.wgt.RDat	chr12:131997800-131998250	12	131997800	131998250		rs10848425	1.543	rs4907434	-0.0396	2.32	0.58268	33	1	top1.as	0.4769	0.0051	0.81035	0.418
analysis/predict/WEIGHTS//chr12:13543350-13543850.wgt.RDat	chr12:13543350-13543850	12	13543350	13543850		rs12581982	-2.658	rs7976825	0.281	-2.08	2.38235	54	1	top1.qtl	0.086	0.00038	-1.18605	0.236
analysis/predict/WEIGHTS//chr12:13607000-13607500.wgt.RDat	chr12:13607000-13607500	12	13607000	13607500		rs7964461	1.443	rs10845776	-0.0366	1.24	0.22353	41	1	top1.qtl	0.046	0.0077	0.08421	0.933
analysis/predict/WEIGHTS//chr12:14416650-14417150.wgt.RDat	chr12:14416650-14417150	12	14416650	14417150		rs10845938	-7.15	rs12578518	0.11878	-3.569	5.0488	18	3	lasso.plasma	0.082	0.00051	-4.65674	3.21e-06
analysis/predict/WEIGHTS//chr12:14956250-14956800.wgt.RDat	chr12:14956250-14956800	12	14956250	14956800		rs6488711	2.958	rs17761801	0.073542	-2.533	-2.53465	20	6	lasso.as	0.2551	0.0031	1.5078	0.132
analysis/predict/WEIGHTS//chr12:14965400-14965900.wgt.RDat	chr12:14965400-14965900	12	14965400	14965900		rs11614445	-2.755	rs4763397	0.505	1.717	-2.51456	19	1	top1	0.5055	0.00051	-2.51456	0.0119
analysis/predict/WEIGHTS//chr12:16588800-16589700.wgt.RDat	chr12:16588800-16589700	12	16588800	16589700		rs34725238	3.901	rs2193140	0.326	6.55	1.54217	21	1	top1	0.18	1.9e-07	1.54217	0.123
analysis/predict/WEIGHTS//chr12:16677200-16677800.wgt.RDat	chr12:16677200-16677800	12	16677200	16677800		rs7296207	3.203	rs7301074	0.008772	-2.185	-0.9138	23	4	lasso.plasma	0.059	0.003	1.78222	0.0747
analysis/predict/WEIGHTS//chr12:1680750-1681500.wgt.RDat	chr12:1680750-1681500	12	1680750	1681500		rs11830202	1.899	rs11615227	0.00252	-2.727	-1.66197	25	1	top1.as	0.2502	0.015	1.66197	0.0965
analysis/predict/WEIGHTS//chr12:18395500-18396150.wgt.RDat	chr12:18395500-18396150	12	18395500	18396150		rs7970341	-4.024	rs10770333	-0.0192	-2.027	2.79012	27	1	top1	0.037	0.015	-2.79012	0.00527
analysis/predict/WEIGHTS//chr12:1841400-1842000.wgt.RDat	chr12:1841400-1842000	12	1841400	1842000		rs4766413	0.82	rs10773982	-0.00177	2.186	0.1647	13	5	lasso	0.3982	0.0022	0.46853	0.639
analysis/predict/WEIGHTS//chr12:18596700-18597200.wgt.RDat	chr12:18596700-18597200	12	18596700	18597200		rs12422451	2.741	rs11044100	0.736	-6.565	1.73786	19	1	top1.as	0.28	4.4e-11	-1.70874	0.0875
analysis/predict/WEIGHTS//chr12:19872450-19872850.wgt.RDat	chr12:19872450-19872850	12	19872450	19872850		rs10505854	-3.647	rs10770522	-0.0197	1.679	1.7561	29	1	top1.as	0.5663	0.0025	-1.06504	0.287
analysis/predict/WEIGHTS//chr12:19899400-19899800.wgt.RDat	chr12:19899400-19899800	12	19899400	19899800		rs10505854	-3.647	rs10505850	0.273081	2.306	1.61111	23	7	lasso.as	0.7106	2.7e-05	1.54624	0.122
analysis/predict/WEIGHTS//chr12:20164000-20164650.wgt.RDat	chr12:20164000-20164650	12	20164000	20164650		rs2728620	-3.147	rs4762920	0.0366	2.838	-1.8913	25	1	top1.as	0.2088	0.0057	3.14729	0.00165
analysis/predict/WEIGHTS//chr12:20171100-20171800.wgt.RDat	chr12:20171100-20171800	12	20171100	20171800		rs2728620	-3.147	rs2728609	-0.0274	3.179	-0.39098	28	1	top1	0.037	0.015	-0.39098	0.696
analysis/predict/WEIGHTS//chr12:2045500-2046150.wgt.RDat	chr12:2045500-2046150	12	2045500	2046150		rs17694584	2.355	rs7305265	0.38	2.217	-1.67327	25	1	top1.as	0.712	6.9e-06	-1.67327	0.0943
analysis/predict/WEIGHTS//chr12:20869850-20870750.wgt.RDat	chr12:20869850-20870750	12	20869850	20870750		rs11045399	2.071	rs2271656	0.0109	-1.744	-1.66667	26	1	top1.as	0.042	0.01	1.00939	0.313
analysis/predict/WEIGHTS//chr12:20983150-20983950.wgt.RDat	chr12:20983150-20983950	12	20983150	20983950		rs12228798	1.25	rs12824927	-0.025557	-1.542	-0.15517	30	16	lasso.as	0.4003	0.00023	0.085091	0.932
analysis/predict/WEIGHTS//chr12:21055850-21056500.wgt.RDat	chr12:21055850-21056500	12	21055850	21056500		rs3764006	0.984	rs4762804	0.213477	-4.54	0.8095	33	13	lasso.plasma	0.11	7.3e-05	-1.32566	0.185
analysis/predict/WEIGHTS//chr12:22403900-22404600.wgt.RDat	chr12:22403900-22404600	12	22403900	22404600		rs2012936	-0.88	rs11046351	0.012	-3.503	-0.26506	28	1	top1.qtl	0.0535	0.0044	0.60345	0.546
analysis/predict/WEIGHTS//chr12:25429600-25430050.wgt.RDat	chr12:25429600-25430050	12	25429600	25430050		rs7963171	-1.767	rs10743555	0.595919	-2.506	-0.74737	22	8	lasso.as	0.7338	0.00011	0.964708	0.335
analysis/predict/WEIGHTS//chr12:25775900-25776350.wgt.RDat	chr12:25775900-25776350	12	25775900	25776350		rs7139066	-1.393	rs1877145	0.379	-2.604	-0.37615	19	1	top1.as	0.542	0.0022	0.37615	0.707
analysis/predict/WEIGHTS//chr12:26121350-26122650.wgt.RDat	chr12:26121350-26122650	12	26121350	26122650		rs4963941	-1.18	rs10842643	0.061591	2.999	0.8402	24	2	lasso.plasma	0.1174	0.011	1.04318	0.297
analysis/predict/WEIGHTS//chr12:26266900-26267700.wgt.RDat	chr12:26266900-26267700	12	26266900	26267700		rs2343071	2.294	rs16930139	0.0082	-2.578	-0.76829	23	1	top1.as	0.3302	0.0038	0.76829	0.442
analysis/predict/WEIGHTS//chr12:26876350-26877100.wgt.RDat	chr12:26876350-26877100	12	26876350	26877100		rs744180	-2.435	rs12578750	0.024109	-2.521	1.01075	36	6	lasso.as	0.2076	0.00086	-0.946259	0.344
analysis/predict/WEIGHTS//chr12:27248150-27248750.wgt.RDat	chr12:27248150-27248750	12	27248150	27248750		rs841652	-2.925	rs11048844	0.137	2.299	-2.825	17	1	top1.as	0.271	0.011	-2.825	0.00473
analysis/predict/WEIGHTS//chr12:27397000-27397500.wgt.RDat	chr12:27397000-27397500	12	27397000	27397500		rs922275	2.578	rs922275	-0.0137	1.794	2.57831	19	1	top1.qtl	0.041	0.012	2.57831	0.00993
analysis/predict/WEIGHTS//chr12:27446300-27446900.wgt.RDat	chr12:27446300-27446900	12	27446300	27446900		rs16931837	1.178	rs10842899	-0.0888	4.128	-0.28049	23	1	top1.qtl	0.234	2.6e-09	-0.28049	0.779
analysis/predict/WEIGHTS//chr12:27483650-27484150.wgt.RDat	chr12:27483650-27484150	12	27483650	27484150		rs12830757	1.459	rs10506018	-0.0158	-2.481	0.06306	26	1	top1.as	0.35899	0.0084	-0.09639	0.923
analysis/predict/WEIGHTS//chr12:27577150-27578100.wgt.RDat	chr12:27577150-27578100	12	27577150	27578100		rs10842916	-0.984	rs10842916	0.586	-1.86	-0.98438	27	1	top1.as	0.7331	0.00023	0.98438	0.325
analysis/predict/WEIGHTS//chr12:2771650-2772150.wgt.RDat	chr12:2771650-2772150	12	2771650	2772150		rs104629	-2.17	rs2238096	0.0651	1.713	-1.8941	30	3	lasso	0.051	0.0053	-0.4289	0.668
analysis/predict/WEIGHTS//chr12:27796850-27797250.wgt.RDat	chr12:27796850-27797250	12	27796850	27797250		rs7295096	-1.779	rs16932246	0.0306	3.063	0.55319	36	1	top1	0.044	0.0091	0.55319	0.58
analysis/predict/WEIGHTS//chr12:27863050-27863950.wgt.RDat	chr12:27863050-27863950	12	27863050	27863950		rs3764010	1	rs11049108	0.072	-2.205	-0.47706	14	1	top1.qtl	0.082	0.00051	0.47706	0.633
analysis/predict/WEIGHTS//chr12:28041550-28042100.wgt.RDat	chr12:28041550-28042100	12	28041550	28042100		rs258425	-1.569	rs10843013	-0.0643	1.788	-0.27	21	1	top1.qtl	0.039	0.014	-0.27	0.787
analysis/predict/WEIGHTS//chr12:28059400-28060050.wgt.RDat	chr12:28059400-28060050	12	28059400	28060050		rs10771385	1.317	rs258434	0.1	-0.542	0.91111	21	1	top1	0.041	0.011	-0.91111	0.362
analysis/predict/WEIGHTS//chr12:28369500-28370050.wgt.RDat	chr12:28369500-28370050	12	28369500	28370050		rs11049473	0.961	rs11049471	0.101927	3.269	-0.57471	11	6	lasso.as	0.4195	0.0039	-0.434019	0.664
analysis/predict/WEIGHTS//chr12:28394900-28395500.wgt.RDat	chr12:28394900-28395500	12	28394900	28395500		rs11049473	0.961	rs10843139	-0.022	-2.137	-0.46067	12	1	top1	0.09	0.00028	0.46067	0.645
analysis/predict/WEIGHTS//chr12:28596100-28596650.wgt.RDat	chr12:28596100-28596650	12	28596100	28596650		rs16932846	1.526	rs2141203	0.029263	3.309	-0.42529	26	9	lasso.as	0.378	0.0008	-0.545433	0.585
analysis/predict/WEIGHTS//chr12:2873400-2874000.wgt.RDat	chr12:2873400-2874000	12	2873400	2874000		rs4133287	1.991	rs4075718	0.414	-2.126	0.47115	22	1	top1	0.4142	0.0041	-0.47115	0.638
analysis/predict/WEIGHTS//chr12:2903850-2904200.wgt.RDat	chr12:2903850-2904200	12	2903850	2904200		rs4133287	1.991	rs12823126	0.0852	-0.879	-1.26531	19	1	top1.qtl	0.074	0.00096	-0.325	0.745
analysis/predict/WEIGHTS//chr12:29353450-29353900.wgt.RDat	chr12:29353450-29353900	12	29353450	29353900		rs10492385	-2.062	rs7974769	-0.0693	-2.692	-0.7658	33	1	lasso	0.047	0.0074	0.76577	0.444
analysis/predict/WEIGHTS//chr12:30513900-30514550.wgt.RDat	chr12:30513900-30514550	12	30513900	30514550		rs354113	-2.41	rs1267323	0.332	-3.149	0.25301	26	1	top1	0.332	0.0092	-0.25301	0.8
analysis/predict/WEIGHTS//chr12:30581050-30581400.wgt.RDat	chr12:30581050-30581400	12	30581050	30581400		rs16906352	1.688	rs1580964	0.0841	-3.95	-0.55422	28	1	top1.qtl	0.11	5.2e-05	0.59524	0.552
analysis/predict/WEIGHTS//chr12:30610450-30610950.wgt.RDat	chr12:30610450-30610950	12	30610450	30610950		rs10743716	0.735	rs10734789	0.189	0.922	0.68675	26	1	top1.as	0.07	0.0013	-0.56626	0.571
analysis/predict/WEIGHTS//chr12:31671050-31671400.wgt.RDat	chr12:31671050-31671400	12	31671050	31671400		rs17497517	-2.615	rs4930979	0.355	-3.31	0.09639	14	1	top1.qtl	0.38	0.0049	-0.09639	0.923
analysis/predict/WEIGHTS//chr12:31932950-31933500.wgt.RDat	chr12:31932950-31933500	12	31932950	31933500		rs6488007	2.558	rs1150965	0.495	-6.742	-0.94595	32	1	top1.qtl	0.34	1.3e-13	0.94595	0.344
analysis/predict/WEIGHTS//chr12:32203000-32203400.wgt.RDat	chr12:32203000-32203400	12	32203000	32203400		rs2594034	-1.347	rs7135049	-0.00332	3.057	0.1978	34	1	top1.qtl	0.08	0.00058	0.16484	0.869
analysis/predict/WEIGHTS//chr12:32387750-32388350.wgt.RDat	chr12:32387750-32388350	12	32387750	32388350		rs10844159	-2.695	rs811078	0.0222	-2.506	1.39024	24	1	top1.as	0.3542	0.015	-0.46988	0.638
analysis/predict/WEIGHTS//chr12:32398150-32398650.wgt.RDat	chr12:32398150-32398650	12	32398150	32398650		rs10844159	-2.695	rs792853	0.058559	-3.004	0.3012	24	7	lasso.plasma	0.065	0.0018	-0.26618	0.79
analysis/predict/WEIGHTS//chr12:32430200-32430900.wgt.RDat	chr12:32430200-32430900	12	32430200	32430900		rs9988933	-2.289	rs2608396	-0.02563	-3.166	0.9036	37	2	lasso.plasma	0.053	0.0047	-0.63261	0.527
analysis/predict/WEIGHTS//chr12:33049750-33050550.wgt.RDat	chr12:33049750-33050550	12	33049750	33050550		rs12425072	-2.285	rs7299220	0.171718	-1.666	-0.8647	22	5	lasso.plasma	0.2779	0.0083	-0.46637	0.641
analysis/predict/WEIGHTS//chr12:33070000-33070600.wgt.RDat	chr12:33070000-33070600	12	33070000	33070600		rs12425072	-2.285	rs10844387	0.358833	4.173	1.52174	27	3	lasso.as	0.361	0.0049	1.6074	0.108
analysis/predict/WEIGHTS//chr12:33073350-33074000.wgt.RDat	chr12:33073350-33074000	12	33073350	33074000		rs12425072	-2.285	rs10844387	0.433237	6.559	1.5217	27	3	lasso.plasma	0.26	2.2e-10	2.11716	0.0342
analysis/predict/WEIGHTS//chr12:3357300-3357950.wgt.RDat	chr12:3357300-3357950	12	3357300	3357950		rs503554	2.209	rs10491967	-0.0128	2.258	-0.21482	38	1	top1.qtl	0.052	0.0051	-1.79646	0.0724
analysis/predict/WEIGHTS//chr12:33734550-33735150.wgt.RDat	chr12:33734550-33735150	12	33734550	33735150		rs815053	0.907	rs815041	-0.00205	0.85	0.67619	30	1	top1.qtl	0.062	0.0024	0.00885	0.993
analysis/predict/WEIGHTS//chr12:34175050-34175600.wgt.RDat	chr12:34175050-34175600	12	34175050	34175600		rs11053060	-1.381	rs11053067	0.25	3.169	0.79518	13	1	top1	0.2501	0.0029	0.79518	0.427
analysis/predict/WEIGHTS//chr12:3807750-3808300.wgt.RDat	chr12:3807750-3808300	12	3807750	3808300		rs11612550	1.771	rs242001	-0.0112	-2.044	0.21333	32	1	top1	0.045	0.0086	-0.21333	0.831
analysis/predict/WEIGHTS//chr12:3904500-3905050.wgt.RDat	chr12:3904500-3905050	12	3904500	3905050		rs7967830	2.99	rs1035001	0.117	1.87	0.65556	26	1	top1.qtl	0.0468	0.0073	0.70455	0.481
analysis/predict/WEIGHTS//chr12:3918550-3918950.wgt.RDat	chr12:3918550-3918950	12	3918550	3918950		rs7967830	2.99	rs11062826	0.436	0.845	-0.82888	25	1	top1	0.436	0.0042	-0.82888	0.407
analysis/predict/WEIGHTS//chr12:3925050-3925550.wgt.RDat	chr12:3925050-3925550	12	3925050	3925550		rs7967830	2.99	rs2231381	0.0996	1.897	1.55725	25	1	top1.qtl	0.066	0.0017	-0.06364	0.949
analysis/predict/WEIGHTS//chr12:3960800-3961450.wgt.RDat	chr12:3960800-3961450	12	3960800	3961450		rs7310728	-1.511	rs4765757	0.083156	3.151	0.21849	22	10	lasso.as	0.4063	0.0046	-0.555738	0.578
analysis/predict/WEIGHTS//chr12:3972550-3973450.wgt.RDat	chr12:3972550-3973450	12	3972550	3973450		rs7310728	-1.511	rs11062884	-0.0262	1.692	-0.91005	24	1	top1.as	0.2917	0.01	0.90588	0.365
analysis/predict/WEIGHTS//chr12:41411750-41412250.wgt.RDat	chr12:41411750-41412250	12	41411750	41412250		rs17624000	-1.62	rs1434687	0.374	-4.194	0.98765	14	1	top1.qtl	0.092	0.00024	-0.98765	0.323
analysis/predict/WEIGHTS//chr12:42717600-42718050.wgt.RDat	chr12:42717600-42718050	12	42717600	42718050		rs4768397	2.185	rs2406674	0.029227	-3.795	-0.7901	15	6	lasso.plasma	0.14	5.3e-06	-0.28774	0.774
analysis/predict/WEIGHTS//chr12:44998150-44998650.wgt.RDat	chr12:44998150-44998650	12	44998150	44998650		rs1545496	-1.711	rs4768564	0.0693	-4.745	1.4625	33	6	lasso	0.178	2.8e-07	-1.15621	0.248
analysis/predict/WEIGHTS//chr12:45525650-45526350.wgt.RDat	chr12:45525650-45526350	12	45525650	45526350		rs7303573	-1.357	rs10467207	0.323313	1.696	0.90141	12	1	lasso.as	0.042	0.011	0.901408	0.367
analysis/predict/WEIGHTS//chr12:46603800-46604350.wgt.RDat	chr12:46603800-46604350	12	46603800	46604350		rs3497	3.135	rs17096794	0.0548	3.396	-0.11972	35	1	top1.as	0.21486	0.0067	-0.27922	0.78
analysis/predict/WEIGHTS//chr12:46765000-46765500.wgt.RDat	chr12:46765000-46765500	12	46765000	46765500		rs7960147	-0.753	rs4768698	0.0307	-3.406	-0.66667	15	1	top1.as	0.06171	0.0024	0.66667	0.505
analysis/predict/WEIGHTS//chr12:48152600-48153050.wgt.RDat	chr12:48152600-48153050	12	48152600	48153050		rs1548518	-4.634	rs3782908	-0.0262	3.429	-0.43373	30	1	top1.qtl	0.06	0.0027	-0.43374	0.664
analysis/predict/WEIGHTS//chr12:48391000-48391450.wgt.RDat	chr12:48391000-48391450	12	48391000	48391450		rs1793959	-5.894	rs10875716	0.181929	3.472	-1.9524	49	4	lasso.plasma	0.2207	0.0079	-3.0004	0.0027
analysis/predict/WEIGHTS//chr12:48415400-48416250.wgt.RDat	chr12:48415400-48416250	12	48415400	48416250		rs17122571	-6.606	rs4760609	-0.0192	-2.282	3.88421	36	1	top1.as	0.1318	0.0044	0.42169	0.673
analysis/predict/WEIGHTS//chr12:49110250-49111050.wgt.RDat	chr12:49110250-49111050	12	49110250	49111050		rs11168698	-0.98	rs7975030	-0.0225	-1.951	-0.01136	9	1	top1.as	0.05831	0.0031	0.14583	0.884
analysis/predict/WEIGHTS//chr12:49325450-49325750.wgt.RDat	chr12:49325450-49325750	12	49325450	49325750		rs833831	-1.843	rs7297958	0.036492	2.952	0.1235	25	6	lasso.plasma	0.055	0.0038	0.47289	0.636
analysis/predict/WEIGHTS//chr12:49412400-49413050.wgt.RDat	chr12:49412400-49413050	12	49412400	49413050		rs3741619	3.494	rs11168828	0.281	-3.728	-1.40805	9	1	top1.as	0.285	0.0014	1.40805	0.159
analysis/predict/WEIGHTS//chr12:50151100-50151700.wgt.RDat	chr12:50151100-50151700	12	50151100	50151700		rs17123981	2.476	rs11169154	-0.065132	0.913	0.69634	10	8	lasso.as	0.476	0.011	-0.140087	0.889
analysis/predict/WEIGHTS//chr12:52348650-52349150.wgt.RDat	chr12:52348650-52349150	12	52348650	52349150		rs813470	-1.703	rs7962469	0.0119	-1.968	-1.58621	15	1	top1.qtl	0.045	0.0086	-0.95294	0.341
analysis/predict/WEIGHTS//chr12:52437300-52437750.wgt.RDat	chr12:52437300-52437750	12	52437300	52437750		rs2701129	2.569	rs2701124	0.207	3.023	1.49091	23	1	top1.as	0.4136	0.0017	1.49091	0.136
analysis/predict/WEIGHTS//chr12:52480050-52480650.wgt.RDat	chr12:52480050-52480650	12	52480050	52480650		rs7313454	-2.124	rs3951715	0.0531	2.895	1.52071	16	1	top1.as	0.0628	0.0022	1.52071	0.128
analysis/predict/WEIGHTS//chr12:52486950-52487500.wgt.RDat	chr12:52486950-52487500	12	52486950	52487500		rs7313454	-2.124	rs2360644	-0.0527	-1.878	0.41935	14	1	top1	0.045	0.0085	-0.41935	0.675
analysis/predict/WEIGHTS//chr12:52692250-52692950.wgt.RDat	chr12:52692250-52692950	12	52692250	52692950		rs3825221	-3.466	rs17706759	0.161	1.198	0.35135	52	1	top1	0.1606	0.0023	0.35135	0.725
analysis/predict/WEIGHTS//chr12:52838550-52838800.wgt.RDat	chr12:52838550-52838800	12	52838550	52838800		rs17717236	-1.464	rs7969089	-0.042	-3.685	-0.38144	43	1	top1	0.102	0.00011	0.38144	0.703
analysis/predict/WEIGHTS//chr12:52848150-52848900.wgt.RDat	chr12:52848150-52848900	12	52848150	52848900		rs17717236	-1.464	rs1798675	0.316	5.003	0.36471	41	1	top1	0.316	0.00014	0.36471	0.715
analysis/predict/WEIGHTS//chr12:53024550-53025050.wgt.RDat	chr12:53024550-53025050	12	53024550	53025050		rs11170208	2.308	rs670843	-0.0247	3.043	-0.45055	41	1	top1	0.073	0.001	-0.45055	0.652
analysis/predict/WEIGHTS//chr12:53076600-53077250.wgt.RDat	chr12:53076600-53077250	12	53076600	53077250		rs828368	-3.176	rs10876321	0.398	4.824	1.38384	40	1	top1	0.398	0.0017	1.38384	0.166
analysis/predict/WEIGHTS//chr12:53309250-53310000.wgt.RDat	chr12:53309250-53310000	12	53309250	53310000		rs4919743	13.578	rs17120257	0.187	4.027	13.431	19	1	top1.qtl	0.079	0.00065	11.25	2.32e-29
analysis/predict/WEIGHTS//chr12:53834900-53835700.wgt.RDat	chr12:53834900-53835700	12	53834900	53835700		rs784566	-1.522	rs7309494	0.25	0.711	1.37383	14	1	top1.as	0.2967	0.0063	1.27103	0.204
analysis/predict/WEIGHTS//chr12:54069650-54070300.wgt.RDat	chr12:54069650-54070300	12	54069650	54070300		rs10876477	1.259	rs12422531	-0.0163	2.139	-0.8537	30	6	lasso	0.037	0.015	-0.76595	0.444
analysis/predict/WEIGHTS//chr12:5418900-5419250.wgt.RDat	chr12:5418900-5419250	12	5418900	5419250		rs4766356	1.012	rs4766355	-0.028	-3.302	-0.38044	19	1	top1	0.107	7.6e-05	0.38044	0.704
analysis/predict/WEIGHTS//chr12:54837850-54838550.wgt.RDat	chr12:54837850-54838550	12	54837850	54838550		rs12318758	2.549	rs12306394	-0.013054	2.834	1.3932	13	10	lasso.plasma	0.059	0.0029	0.12964	0.897
analysis/predict/WEIGHTS//chr12:55342800-55343600.wgt.RDat	chr12:55342800-55343600	12	55342800	55343600		rs1801876	2.128	rs4553443	-0.00267	-3.496	-1.35714	38	1	top1.qtl	0.124	2e-05	1.35714	0.175
analysis/predict/WEIGHTS//chr12:56920650-56921150.wgt.RDat	chr12:56920650-56921150	12	56920650	56921150		rs813497	1.876	rs813497	0.0978	1.89	1.87611	19	1	top1.qtl	0.039	0.014	1.11675	0.264
analysis/predict/WEIGHTS//chr12:57081950-57082300.wgt.RDat	chr12:57081950-57082300	12	57081950	57082300		rs2290893	3.012	rs17445108	-0.00352	-1.27	-0.32857	8	1	top1	0.0572	0.0033	0.32857	0.742
analysis/predict/WEIGHTS//chr12:58386800-58387400.wgt.RDat	chr12:58386800-58387400	12	58386800	58387400		rs4016144	1.943	rs7135063	0.286	-4.088	-0.64773	10	1	top1.qtl	0.063	0.0021	0.64773	0.517
analysis/predict/WEIGHTS//chr12:58565550-58566050.wgt.RDat	chr12:58565550-58566050	12	58565550	58566050		rs12424635	2.141	rs17120420	-0.0255	2.224	2.0404	23	1	top1.qtl	0.054	0.0043	2.0404	0.0413
analysis/predict/WEIGHTS//chr12:59220900-59221400.wgt.RDat	chr12:59220900-59221400	12	59220900	59221400		rs1497231	1.833	rs11172764	-0.0303	3.109	0.82803	19	1	top1.qtl	0.081	0.00057	0.82803	0.408
analysis/predict/WEIGHTS//chr12:59431050-59431550.wgt.RDat	chr12:59431050-59431550	12	59431050	59431550		rs17121877	2.008	rs12370707	0.107	-2.774	-0.07895	23	1	top1.as	0.4469	0.0072	0.28099	0.779
analysis/predict/WEIGHTS//chr12:59781850-59782400.wgt.RDat	chr12:59781850-59782400	12	59781850	59782400		rs9652013	1.358	rs1040096	-0.0559	1.64	-1.14286	16	1	top1.as	0.3708	0.0056	0.31765	0.751
analysis/predict/WEIGHTS//chr12:60237000-60237650.wgt.RDat	chr12:60237000-60237650	12	60237000	60237650		rs12231727	-1.462	rs12049994	-0.0219	3.013	-0.71171	29	1	top1.qtl	0.058	0.0032	-0.71171	0.477
analysis/predict/WEIGHTS//chr12:60962650-60963150.wgt.RDat	chr12:60962650-60963150	12	60962650	60963150		rs7967402	0.626	rs11524982	0.177	-1.83	0.04321	14	1	top1.qtl	0.039	0.014	0.44444	0.657
analysis/predict/WEIGHTS//chr12:61098150-61098950.wgt.RDat	chr12:61098150-61098950	12	61098150	61098950		rs273788	0.857	rs1391597	0.197	-3.58	-0.66265	9	1	top1.qtl	0.2094	0.0074	0.01235	0.99
analysis/predict/WEIGHTS//chr12:61106150-61106500.wgt.RDat	chr12:61106150-61106500	12	61106150	61106500		rs1391597	-0.663	rs273836	-0.0452	2.104	0.37615	9	1	top1	0.066	0.0018	0.37615	0.707
analysis/predict/WEIGHTS//chr12:62666850-62667350.wgt.RDat	chr12:62666850-62667350	12	62666850	62667350		rs7296326	-0.891	rs11612366	0.271	-3.768	-0.13333	20	1	top1	0.061	0.0024	0.13333	0.894
analysis/predict/WEIGHTS//chr12:62860300-62860800.wgt.RDat	chr12:62860300-62860800	12	62860300	62860800		rs11174487	-0.917	rs7308021	-0.0501	-1.686	0.7037	16	1	top1.as	0.055	0.004	0.41177	0.681
analysis/predict/WEIGHTS//chr12:62913950-62914600.wgt.RDat	chr12:62913950-62914600	12	62913950	62914600		rs7958597	1.21	rs4763023	0.169	4.974	0.6506	14	8	lasso	0.182	2.1e-07	-0.18229	0.855
analysis/predict/WEIGHTS//chr12:62996000-62997050.wgt.RDat	chr12:62996000-62997050	12	62996000	62997050		rs10735910	1.282	rs10877894	0.0275	1.482	0.56667	19	1	top1.qtl	0.071	0.0012	0.56667	0.571
analysis/predict/WEIGHTS//chr12:6306800-6307200.wgt.RDat	chr12:6306800-6307200	12	6306800	6307200		rs797770	-1.364	rs2268015	0.161	3.529	0.87805	19	1	top1	0.038	0.015	0.87805	0.38
analysis/predict/WEIGHTS//chr12:63294550-63295150.wgt.RDat	chr12:63294550-63295150	12	63294550	63295150		rs11174719	-2.434	rs808868	0.149	5.482	1.29545	35	1	top1	0.25	8.6e-10	1.29545	0.195
analysis/predict/WEIGHTS//chr12:63361250-63362000.wgt.RDat	chr12:63361250-63362000	12	63361250	63362000		rs1081780	3.703	rs699608	0.0921	1.1	1.95556	21	1	top1.qtl	0.0738	0.00095	1.73171	0.0833
analysis/predict/WEIGHTS//chr12:63432050-63432800.wgt.RDat	chr12:63432050-63432800	12	63432050	63432800		rs7297754	2.333	rs1273109	0.428	4.506	-0.83871	33	1	top1	0.428	4.9e-05	-0.83871	0.402
analysis/predict/WEIGHTS//chr12:6344400-6345200.wgt.RDat	chr12:6344400-6345200	12	6344400	6345200		rs4764487	0.964	rs2284345	0.134	-0.672	-0.42169	16	1	top1	0.1345	0.0051	0.42169	0.673
analysis/predict/WEIGHTS//chr12:63851650-63852400.wgt.RDat	chr12:63851650-63852400	12	63851650	63852400		rs17694397	1.982	rs518496	0.54	8.032	-1.56977	13	1	top1.qtl	0.4	1.5e-16	-1.56977	0.116
analysis/predict/WEIGHTS//chr12:63906250-63906800.wgt.RDat	chr12:63906250-63906800	12	63906250	63906800		rs11175003	2.117	rs11175003	-0.020232	-3.243	2.117	14	3	lasso.plasma	0.105	8.7e-05	-1.52698	0.127
analysis/predict/WEIGHTS//chr12:6445200-6445750.wgt.RDat	chr12:6445200-6445750	12	6445200	6445750		rs6489711	1.463	rs4764497	-0.0398	-2.639	0.39535	20	1	top1.qtl	0.063	0.0021	-0.5	0.617
analysis/predict/WEIGHTS//chr12:64831250-64831900.wgt.RDat	chr12:64831250-64831900	12	64831250	64831900		rs12819140	-1.755	rs12316829	0.048734	-1.862	0.07759	15	6	lasso.as	0.059	0.0029	-0.434561	0.664
analysis/predict/WEIGHTS//chr12:6485200-6485850.wgt.RDat	chr12:6485200-6485850	12	6485200	6485850		rs3759333	1.573	rs11831297	0.0185	2.277	-0.97309	21	1	top1.as	0.2582	0.0021	-0.97309	0.331
analysis/predict/WEIGHTS//chr12:65019050-65020050.wgt.RDat	chr12:65019050-65020050	12	65019050	65020050		rs7313765	-6.866	rs11175492	0.184	3.574	1.57143	24	1	top1	0.184	0.015	1.57143	0.116
analysis/predict/WEIGHTS//chr12:65027750-65028150.wgt.RDat	chr12:65027750-65028150	12	65027750	65028150		rs7313765	-6.866	rs6581580	-0.0483	-2.807	-6.25	29	1	top1.qtl	0.089	0.00029	6.84524	7.63e-12
analysis/predict/WEIGHTS//chr12:65044350-65045050.wgt.RDat	chr12:65044350-65045050	12	65044350	65045050		rs1147107	-6.845	rs11175490	-0.0246	2.385	1.85106	27	1	top1	0.043	0.0095	1.85106	0.0642
analysis/predict/WEIGHTS//chr12:65288700-65289300.wgt.RDat	chr12:65288700-65289300	12	65288700	65289300		rs1147085	-2.034	rs1147085	0.162	3.201	-2.03409	18	1	top1	0.045	0.0084	-2.03409	0.0419
analysis/predict/WEIGHTS//chr12:6579850-6580350.wgt.RDat	chr12:6579850-6580350	12	6579850	6580350		rs7978603	3.188	rs1001127	-0.0167	-3.157	-0.95506	44	1	top1	0.059	0.003	0.95506	0.34
analysis/predict/WEIGHTS//chr12:66024100-66024900.wgt.RDat	chr12:66024100-66024900	12	66024100	66024900		rs12311233	0.917	rs4762109	0.043487	-1.2	-0.1008	19	7	lasso.plasma	0.2359	0.011	0.17035	0.865
analysis/predict/WEIGHTS//chr12:67434000-67434800.wgt.RDat	chr12:67434000-67434800	12	67434000	67434800		rs774380	2.453	rs954510	0.0184	3.458	-0.36735	25	1	top1.qtl	0.0912	0.00025	-0.36735	0.713
analysis/predict/WEIGHTS//chr12:68333200-68333650.wgt.RDat	chr12:68333200-68333650	12	68333200	68333650		rs11176946	1.6	rs2906850	0.329	0.867	-0.24706	31	1	top1	0.329	0.006	-0.24706	0.805
analysis/predict/WEIGHTS//chr12:6884900-6885400.wgt.RDat	chr12:6884900-6885400	12	6884900	6885400		rs1882545	2.531	rs2255301	0.146	-1.267	0.47872	29	1	top1	0.146	0.011	-0.47872	0.632
analysis/predict/WEIGHTS//chr12:69904200-69904550.wgt.RDat	chr12:69904200-69904550	12	69904200	69904550		rs221098	-1.621	rs528856	0.218	-1.108	1.15909	18	1	top1.as	0.2966	0.0042	-0.26191	0.793
analysis/predict/WEIGHTS//chr12:70234200-70235050.wgt.RDat	chr12:70234200-70235050	12	70234200	70235050		rs17107156	-3.06	rs17813725	0.152	4.17	-0.3925	17	7	lasso	0.183	0.00093	-0.09458	0.925
analysis/predict/WEIGHTS//chr12:70947050-70947950.wgt.RDat	chr12:70947050-70947950	12	70947050	70947950		rs919595	-2.627	rs17226353	0.241	3.847	-0.09649	42	1	top1	0.241	0.0009	-0.09649	0.923
analysis/predict/WEIGHTS//chr12:70965250-70965900.wgt.RDat	chr12:70965250-70965900	12	70965250	70965900		rs2567133	-2.591	rs1561798	0.208834	-4.214	-0.0222	44	8	lasso.plasma	0.045	0.0084	-0.56134	0.575
analysis/predict/WEIGHTS//chr12:73440450-73441050.wgt.RDat	chr12:73440450-73441050	12	73440450	73441050		rs7960235	1.741	rs952393	-0.0255	4.033	1.60494	22	1	top1.qtl	0.114	4.5e-05	1.60494	0.109
analysis/predict/WEIGHTS//chr12:75017800-75018500.wgt.RDat	chr12:75017800-75018500	12	75017800	75018500		rs2661712	0.407	rs17113938	-0.00186	-0.393	0.22523	19	1	top1	0.0451	0.0083	-0.22523	0.822
analysis/predict/WEIGHTS//chr12:75153250-75153900.wgt.RDat	chr12:75153250-75153900	12	75153250	75153900		rs1911723	2.275	rs1508286	-0.0473	2.45	2	21	1	top1	0.067	0.0016	2	0.0455
analysis/predict/WEIGHTS//chr12:75886300-75887000.wgt.RDat	chr12:75886300-75887000	12	75886300	75887000		rs11180553	-1.806	rs28932170	-0.054182	-2.488	-0.0738	31	18	lasso.plasma	0.052	0.005	-1.43541	0.151
analysis/predict/WEIGHTS//chr12:77015300-77015850.wgt.RDat	chr12:77015300-77015850	12	77015300	77015850		rs2669013	1.957	rs17042409	-0.0544	1.708	1.05405	12	1	top1.as	0.3338	0.0071	1.66304	0.0963
analysis/predict/WEIGHTS//chr12:77738350-77739100.wgt.RDat	chr12:77738350-77739100	12	77738350	77739100		rs7313980	-1.297	rs7977954	0.00991	2.692	-0.2619	29	1	top1.qtl	0.039	0.014	-0.26191	0.793
analysis/predict/WEIGHTS//chr12:77840900-77841350.wgt.RDat	chr12:77840900-77841350	12	77840900	77841350		rs17043588	1.779	rs10506744	0.0201	-3.026	1.45238	19	1	top1.as	0.039	0.014	-1.45238	0.146
analysis/predict/WEIGHTS//chr12:78139750-78140400.wgt.RDat	chr12:78139750-78140400	12	78139750	78140400		rs11106639	1.843	rs1949593	-0.0761	-2.736	1.33721	18	1	top1.qtl	0.081	0.00054	-1.27907	0.201
analysis/predict/WEIGHTS//chr12:78145550-78146250.wgt.RDat	chr12:78145550-78146250	12	78145550	78146250		rs11106639	1.843	rs711153	-0.00173	-3.592	1.4767	16	6	lasso	0.049	0.0064	-1.64345	0.1
analysis/predict/WEIGHTS//chr12:78488900-78489600.wgt.RDat	chr12:78488900-78489600	12	78488900	78489600		rs417596	1.306	rs17224015	0.008646	-3.861	0.2689	23	7	lasso.plasma	0.055	0.004	-0.55186	0.581
analysis/predict/WEIGHTS//chr12:78493500-78494050.wgt.RDat	chr12:78493500-78494050	12	78493500	78494050		rs443544	1.091	rs372394	0.124	-5.071	0.74748	26	1	top1.qtl	0.22	7.1e-09	-0.74747	0.455
analysis/predict/WEIGHTS//chr12:79797650-79798150.wgt.RDat	chr12:79797650-79798150	12	79797650	79798150		rs1526963	1.662	rs11114027	0.291	1.272	1.00763	25	1	top1	0.2908	0.01	1.00763	0.314
analysis/predict/WEIGHTS//chr12:80424450-80426200.wgt.RDat	chr12:80424450-80426200	12	80424450	80426200		rs1920399	-1.619	rs2698271	0.684	10.461	0.50538	16	1	top1	0.53	2e-23	0.50538	0.613
analysis/predict/WEIGHTS//chr12:80429400-80430000.wgt.RDat	chr12:80429400-80430000	12	80429400	80430000		rs7135621	2.798	rs1245073	0.27	5.502	0.47826	18	1	top1.as	0.18	2.7e-07	0.48913	0.625
analysis/predict/WEIGHTS//chr12:80715350-80715900.wgt.RDat	chr12:80715350-80715900	12	80715350	80715900		rs11114407	0.783	rs1451098	-0.0641	1.037	-0.61111	18	1	top1.qtl	0.046	0.0078	-0.61111	0.541
analysis/predict/WEIGHTS//chr12:80868500-80868900.wgt.RDat	chr12:80868500-80868900	12	80868500	80868900		rs12810534	-1.761	rs12099453	-0.097	3.71	-1.15842	20	1	top1.qtl	0.162	1e-06	-1.15842	0.247
analysis/predict/WEIGHTS//chr12:81966050-81966700.wgt.RDat	chr12:81966050-81966700	12	81966050	81966700		rs7308980	1.817	rs7301025	0.139	-4.633	-0.53333	11	1	top1	0.13	1.2e-05	0.53333	0.594
analysis/predict/WEIGHTS//chr12:83108300-83108750.wgt.RDat	chr12:83108300-83108750	12	83108300	83108750		rs7962038	-0.573	rs17009882	-0.0579	-3.298	0.26429	17	1	top1	0.108	7.3e-05	-0.26429	0.792
analysis/predict/WEIGHTS//chr12:83324750-83325800.wgt.RDat	chr12:83324750-83325800	12	83324750	83325800		rs11115493	-2.235	rs7970086	0.0571	-2.926	-0.5906	26	4	lasso	0.05771	0.0032	2.3558	0.0185
analysis/predict/WEIGHTS//chr12:84199550-84200150.wgt.RDat	chr12:84199550-84200150	12	84199550	84200150		rs11116045	-3.432	rs9943845	0.127	-5.905	-0.5938	17	5	lasso	0.23	2.5e-09	1.38848	0.165
analysis/predict/WEIGHTS//chr12:84678000-84678550.wgt.RDat	chr12:84678000-84678550	12	84678000	84678550		rs11116296	-2.577	rs2279307	0.249	1.105	1.66019	25	1	top1.as	0.266	0.014	-1.31633	0.188
analysis/predict/WEIGHTS//chr12:84702650-84703400.wgt.RDat	chr12:84702650-84703400	12	84702650	84703400		rs11116296	-2.577	rs2929738	0.0144	-3.499	-0.2375	19	1	top1	0.053	0.0046	0.2375	0.812
analysis/predict/WEIGHTS//chr12:85981450-85981800.wgt.RDat	chr12:85981450-85981800	12	85981450	85981800		rs7313029	1.679	rs10779171	0.23862	3.964	1.494	14	4	lasso.plasma	0.096	0.00017	2.00551	0.0449
analysis/predict/WEIGHTS//chr12:86162450-86162900.wgt.RDat	chr12:86162450-86162900	12	86162450	86162900		rs7484655	2.664	rs4897823	0.148	3.351	-0.86047	26	1	top1.as	0.4538	0.0024	-0.28571	0.775
analysis/predict/WEIGHTS//chr12:88811150-88811800.wgt.RDat	chr12:88811150-88811800	12	88811150	88811800		rs4842610	-2.398	rs7484757	0.166	1.841	-0.91379	14	1	top1.as	0.44712	0.00037	-0.91379	0.361
analysis/predict/WEIGHTS//chr12:88946300-88947100.wgt.RDat	chr12:88946300-88947100	12	88946300	88947100		rs1472899	-1.614	rs1798011	0.0631	4.364	-1.20134	25	1	top1.qtl	0.141	5.6e-06	-1.20134	0.23
analysis/predict/WEIGHTS//chr12:89557650-89558150.wgt.RDat	chr12:89557650-89558150	12	89557650	89558150		rs7979714	2.569	rs17016443	-0.062954	-2.634	2.1667	15	3	lasso.plasma	0.0904	0.00027	-1.73855	0.0821
analysis/predict/WEIGHTS//chr12:90156450-90157050.wgt.RDat	chr12:90156450-90157050	12	90156450	90157050		rs1949549	-6.784	rs1949549	0.142	4.224	-6.78409	16	1	top1	0.07	0.0012	-6.78409	1.17e-11
analysis/predict/WEIGHTS//chr12:90271750-90272250.wgt.RDat	chr12:90271750-90272250	12	90271750	90272250		rs2553108	-4.217	rs2553110	0.254	-2.022	2.6729	14	1	top1.as	0.5183	0.002	-2.6729	0.00752
analysis/predict/WEIGHTS//chr12:90966500-90967000.wgt.RDat	chr12:90966500-90967000	12	90966500	90967000		rs2051713	-2.537	rs2520548	0.00655	3.689	-1.39024	20	1	top1.as	0.06	0.0027	-1.39024	0.164
analysis/predict/WEIGHTS//chr12:91004850-91005250.wgt.RDat	chr12:91004850-91005250	12	91004850	91005250		rs2723915	1.991	rs2723934	0.0496	0.957	-1.89655	19	1	top1.qtl	0.052	0.0049	-1.89655	0.0579
analysis/predict/WEIGHTS//chr12:92031450-92032050.wgt.RDat	chr12:92031450-92032050	12	92031450	92032050		rs6538287	-1.964	rs11106224	-0.080183	-3.004	-1.8795	15	6	lasso.plasma	0.065	0.0018	1.14812	0.251
analysis/predict/WEIGHTS//chr12:92111800-92113200.wgt.RDat	chr12:92111800-92113200	12	92111800	92113200		rs2172595	1.723	rs17193777	-0.007309	1.31	1.5926	20	18	lasso.plasma	0.085	0.015	0.1318	0.895
analysis/predict/WEIGHTS//chr12:92328000-92328550.wgt.RDat	chr12:92328000-92328550	12	92328000	92328550		rs10859244	2.477	rs4842800	-0.0143	-3.469	-0.0989	39	1	top1.qtl	0.089	0.00029	0.0989	0.921
analysis/predict/WEIGHTS//chr12:92424250-92425050.wgt.RDat	chr12:92424250-92425050	12	92424250	92425050		rs11106394	-1.757	rs11106394	-0.00913	-1.629	-1.75728	22	1	top1	0.047	0.0072	1.75728	0.0789
analysis/predict/WEIGHTS//chr12:93357300-93358100.wgt.RDat	chr12:93357300-93358100	12	93357300	93358100		rs10777456	-2.062	rs10777456	-0.0659	3.067	-2.0615	15	9	lasso	0.04	0.013	-1.82252	0.0684
analysis/predict/WEIGHTS//chr12:93475550-93476000.wgt.RDat	chr12:93475550-93476000	12	93475550	93476000		rs10735308	-2.643	rs4584620	-0.00582	-2.851	1.30851	17	1	top1.qtl	0.057	0.0035	-1.30851	0.191
analysis/predict/WEIGHTS//chr12:938050-939150.wgt.RDat	chr12:938050-939150	12	938050	939150		rs12369414	-1.536	rs10774466	0.0106	1.844	-1.27368	12	1	top1.as	0.043	0.0096	0.80808	0.419
analysis/predict/WEIGHTS//chr12:94082650-94083550.wgt.RDat	chr12:94082650-94083550	12	94082650	94083550		rs10745658	0.852	rs12422532	0.311	-6.214	-0.62921	14	1	top1.as	0.15	2.8e-06	0.62921	0.529
analysis/predict/WEIGHTS//chr12:94105100-94106600.wgt.RDat	chr12:94105100-94106600	12	94105100	94106600		rs10745658	0.852	rs7959913	-0.000167	-2.948	-0.69512	15	1	top1	0.04908	0.0062	0.69512	0.487
analysis/predict/WEIGHTS//chr12:94121000-94121600.wgt.RDat	chr12:94121000-94121600	12	94121000	94121600		rs10859569	-0.89	rs3926587	0.184	-5.69	-0.6341	13	8	lasso	0.18	1.7e-07	0.41784	0.676
analysis/predict/WEIGHTS//chr12:94152600-94153250.wgt.RDat	chr12:94152600-94153250	12	94152600	94153250		rs12831157	2.132	rs10859570	0.096	1.798	0.46552	16	1	top1.qtl	0.044	0.0093	0.46552	0.642
analysis/predict/WEIGHTS//chr12:94207500-94208650.wgt.RDat	chr12:94207500-94208650	12	94207500	94208650		rs4761530	-1.37	rs3858605	0.0214	2.083	-0.63415	34	1	top1.as	0.1146	0.0051	0.01449	0.988
analysis/predict/WEIGHTS//chr12:94231650-94232150.wgt.RDat	chr12:94231650-94232150	12	94231650	94232150		rs10859601	1.698	rs3858604	0.00915	-2.408	-0.78409	40	1	top1.as	0.4379	0.0016	-1.19753	0.231
analysis/predict/WEIGHTS//chr12:94337200-94337950.wgt.RDat	chr12:94337200-94337950	12	94337200	94337950		rs12813150	-1.897	rs270865	-0.0116	-2.296	0.56129	37	1	top1.qtl	0.05	0.0059	-0.32353	0.746
analysis/predict/WEIGHTS//chr12:94453500-94454150.wgt.RDat	chr12:94453500-94454150	12	94453500	94454150		rs11107349	2.235	rs7953863	-0.0395	-1.801	0.193	18	5	lasso	0.047	0.0071	0.52165	0.602
analysis/predict/WEIGHTS//chr12:94484000-94484350.wgt.RDat	chr12:94484000-94484350	12	94484000	94484350		rs10859660	-1.887	rs722152	0.367	5.147	-1.0625	36	1	top1.as	0.487	2.4e-06	-1.0625	0.288
analysis/predict/WEIGHTS//chr12:94929300-94929800.wgt.RDat	chr12:94929300-94929800	12	94929300	94929800		rs12320623	0.935	rs4761632	-0.0444	2.937	0.52212	45	1	top1.qtl	0.039	0.013	0.71681	0.473
analysis/predict/WEIGHTS//chr12:94968000-94968600.wgt.RDat	chr12:94968000-94968600	12	94968000	94968600		rs12426569	3.157	rs12307230	-0.0486	1.752	0.825	50	1	top1.as	0.388	0.0015	-1.13953	0.254
analysis/predict/WEIGHTS//chr12:94968750-94969350.wgt.RDat	chr12:94968750-94969350	12	94968750	94969350		rs12426569	3.157	rs1316366	0.0352	-3.14	-1.5732	49	2	lasso	0.055	0.004	-3.10344	0.00191
analysis/predict/WEIGHTS//chr12:94980300-94981200.wgt.RDat	chr12:94980300-94981200	12	94980300	94981200		rs12426569	3.157	rs1553295	0.141	6.089	0.60241	41	1	top1	0.21	1.8e-08	0.60241	0.547
analysis/predict/WEIGHTS//chr12:94983850-94984450.wgt.RDat	chr12:94983850-94984450	12	94983850	94984450		rs12426569	3.157	rs17022799	0.368	-8.769	-1.15294	39	1	top1.qtl	0.46	2.1e-19	1.15294	0.249
analysis/predict/WEIGHTS//chr12:94985500-94986400.wgt.RDat	chr12:94985500-94986400	12	94985500	94986400		rs12426569	3.157	rs17022799	0.143	-6.253	-1.1529	41	3	lasso	0.15	2.9e-06	0.52842	0.597
analysis/predict/WEIGHTS//chr12:95065450-95065950.wgt.RDat	chr12:95065450-95065950	12	95065450	95065950		rs7966485	-2.412	rs2651982	-0.0771	-1.751	0.8125	18	1	top1.as	0.044	0.0088	0.86014	0.39
analysis/predict/WEIGHTS//chr12:95490550-95491100.wgt.RDat	chr12:95490550-95491100	12	95490550	95491100		rs12320381	-1.769	rs12316136	0.0415	2.257	-1.27778	34	1	top1.qtl	0.054	0.0041	-1.74074	0.0817
analysis/predict/WEIGHTS//chr12:95866550-95867450.wgt.RDat	chr12:95866550-95867450	12	95866550	95867450		rs301013	-1.79	rs7302913	0.160081	-3.87	0.5542	19	6	lasso.plasma	0.074	0.00094	-0.99582	0.319
analysis/predict/WEIGHTS//chr12:96020550-96021350.wgt.RDat	chr12:96020550-96021350	12	96020550	96021350		rs1833472	2.868	rs9783406	-0.023062	-2.84	-0.2083	29	7	lasso.plasma	0.04	0.013	1.04872	0.294
analysis/predict/WEIGHTS//chr12:96095400-96095900.wgt.RDat	chr12:96095400-96095900	12	96095400	96095900		rs1362972	2.713	rs4762610	0.441	-3.123	0.07273	34	1	top1	0.4407	0.0021	-0.07273	0.942
analysis/predict/WEIGHTS//chr12:96129200-96129800.wgt.RDat	chr12:96129200-96129800	12	96129200	96129800		rs4341610	-2.256	rs11108210	0.028145	-2.566	-0.6699	26	1	lasso.plasma	0.0555	0.0038	0.6699	0.503
analysis/predict/WEIGHTS//chr12:96131850-96132350.wgt.RDat	chr12:96131850-96132350	12	96131850	96132350		rs4341610	-2.256	rs10444523	0.12365	-4.936	-0.5977	25	15	lasso.plasma	0.177	3e-07	0.91841	0.358
analysis/predict/WEIGHTS//chr12:97666450-97667250.wgt.RDat	chr12:97666450-97667250	12	97666450	97667250		rs4762376	-1.924	rs11108947	0.143	5.718	1.16102	42	1	top1.qtl	0.27	1.6e-10	1.16102	0.246
analysis/predict/WEIGHTS//chr12:98161150-98161550.wgt.RDat	chr12:98161150-98161550	12	98161150	98161550		rs11109196	1.931	rs12321637	0.010984	-2.309	-0.203	19	1	lasso.plasma	0.066	0.0017	0.20301	0.839
analysis/predict/WEIGHTS//chr12:99278850-99279350.wgt.RDat	chr12:99278850-99279350	12	99278850	99279350		rs11109650	2.973	rs11109644	0.066217	-4.12	-0.4588	21	9	lasso.plasma	0.15	2e-06	0.52521	0.599
analysis/predict/WEIGHTS//chr12:99947150-99947750.wgt.RDat	chr12:99947150-99947750	12	99947150	99947750		rs12298165	-2.03	rs1398087	-0.0433	-1.569	1.60526	15	1	top1.qtl	0.067	0.0016	0.25234	0.801
analysis/predict/WEIGHTS//chr13:100240050-100240650.wgt.RDat	chr13:100240050-100240650	13	100240050	100240650		rs2793783	-2.518	rs1104973	0.0163	-3.794	-1.56471	38	1	top1.qtl	0.076	0.00082	1.42169	0.155116
analysis/predict/WEIGHTS//chr13:100484100-100484700.wgt.RDat	chr13:100484100-100484700	13	100484100	100484700		rs7994234	-1.871	rs17612107	0.008771	1.731	-0.19048	30	1	top1	0.0443	0.0089	-0.19048	0.849
analysis/predict/WEIGHTS//chr13:100737050-100737450.wgt.RDat	chr13:100737050-100737450	13	100737050	100737450		rs9517972	-1.113	rs7981068	0.018804	-1.818	0.29605	14	1	top1.as	0.4625	0.0002	0.41667	0.676922
analysis/predict/WEIGHTS//chr13:101185800-101186200.wgt.RDat	chr13:101185800-101186200	13	101185800	101186200		rs3783183	0.798	rs837332	0.03315	2.1	-0.39286	19	12	lasso.as	0.047	0.0072	-1.1089	0.267467
analysis/predict/WEIGHTS//chr13:101327050-101327450.wgt.RDat	chr13:101327050-101327450	13	101327050	101327450		rs1283198	-1.207	rs9513779	0.017114	3.136	-0.65934	24	1	top1	0.046	0.0076	-0.65934	0.51
analysis/predict/WEIGHTS//chr13:101332650-101332950.wgt.RDat	chr13:101332650-101332950	13	101332650	101332950		rs1283198	-1.207	rs9513789	-0.044241	-2.532	-0.59804	21	1	top1	0.052	0.0048	0.59804	0.55
analysis/predict/WEIGHTS//chr13:102242700-102243300.wgt.RDat	chr13:102242700-102243300	13	102242700	102243300		rs9518449	0.97	rs4771404	-0.095406	-1.432	-0.68041	25	1	top1.qtl	0.048	0.0069	0.31579	0.752163
analysis/predict/WEIGHTS//chr13:106115250-106115800.wgt.RDat	chr13:106115250-106115800	13	106115250	106115800		rs10492528	-2.143	rs10492528	0.543828	2.478	-2.14286	25	1	top1	0.5438	0.0033	-2.14286	0.0321
analysis/predict/WEIGHTS//chr13:106116150-106116900.wgt.RDat	chr13:106116150-106116900	13	106116150	106116900		rs10492528	-2.143	rs10492528	0.39295	1.73	-2.14286	25	1	top1	0.393	0.0097	-2.14286	0.0321
analysis/predict/WEIGHTS//chr13:106988950-106989450.wgt.RDat	chr13:106988950-106989450	13	106988950	106989450		rs7995709	2.953	rs164866	-0.029297	2.229	-1.5116	16	6	lasso.plasma	0.081	0.00054	-1.4987	0.133951
analysis/predict/WEIGHTS//chr13:107217300-107218050.wgt.RDat	chr13:107217300-107218050	13	107217300	107218050		rs6650271	0.818	rs6650271	0.14242	-1.515	0.81818	17	3	lasso.as	0.34099	0.01	-0.6883	0.491245
analysis/predict/WEIGHTS//chr13:107919100-107919600.wgt.RDat	chr13:107919100-107919600	13	107919100	107919600		rs4771568	2.51	rs9558985	0.489108	-5.585	-0.96739	42	1	top1	0.16	8.5e-07	0.96739	0.333
analysis/predict/WEIGHTS//chr13:108469550-108470050.wgt.RDat	chr13:108469550-108470050	13	108469550	108470050		rs7325927	-3.624	rs7988858	-0.046641	-2.607	0.2741	35	6	lasso.plasma	0.077	0.00075	-0.09328	0.925679
analysis/predict/WEIGHTS//chr13:108614450-108615200.wgt.RDat	chr13:108614450-108615200	13	108614450	108615200		rs17718448	-3.016	rs1853793	0.008265	0.975	0.79348	16	1	top1	0.0749	0.00088	0.79348	0.427
analysis/predict/WEIGHTS//chr13:108870450-108870950.wgt.RDat	chr13:108870450-108870950	13	108870450	108870950		rs11620361	1.905	rs17498440	0.181531	1.92	-0.3623	23	1	lasso.plasma	0.501	0.0017	0.51955	0.603375
analysis/predict/WEIGHTS//chr13:109571550-109572450.wgt.RDat	chr13:109571550-109572450	13	109571550	109572450		rs1157741	-2.902	rs9583309	0.269122	-6.02	-2.69512	31	1	top1.as	0.36	2.2e-07	2.69512	0.007036
analysis/predict/WEIGHTS//chr13:109962250-109963050.wgt.RDat	chr13:109962250-109963050	13	109962250	109963050		rs9301366	1.884	rs4598774	-0.0333	2.157	-0.12	24	1	top1	0.046	0.0079	-0.12	0.904
analysis/predict/WEIGHTS//chr13:110048400-110049150.wgt.RDat	chr13:110048400-110049150	13	110048400	110049150		rs7325477	1.966	rs1328250	0.186188	3.367	0.82927	31	1	top1.qtl	0.2029	0.00042	0.14167	0.887343
analysis/predict/WEIGHTS//chr13:110309300-110310350.wgt.RDat	chr13:110309300-110310350	13	110309300	110310350		rs331974	-2.617	rs162563	0.021513	-2.797	1.56436	34	1	top1.qtl	0.043	0.0096	-0.91667	0.359317
analysis/predict/WEIGHTS//chr13:110431200-110431750.wgt.RDat	chr13:110431200-110431750	13	110431200	110431750		rs7981170	-2.632	rs9515120	0.02499	2.401	-0.82184	31	1	top1.as	0.043	0.0098	-0.24691	0.804975
analysis/predict/WEIGHTS//chr13:111049200-111050000.wgt.RDat	chr13:111049200-111050000	13	111049200	111050000		rs4773180	2.186	rs9521725	-0.038617	1.771	-0.42742	38	1	top1.as	0.2525	0.0052	-0.42742	0.669074
analysis/predict/WEIGHTS//chr13:111193450-111194150.wgt.RDat	chr13:111193450-111194150	13	111193450	111194150		rs376275	-2.764	rs377380	-0.008539	3.079	1.04348	52	1	top1.qtl	0.0643	0.0019	1.04348	0.296726
analysis/predict/WEIGHTS//chr13:111249550-111250200.wgt.RDat	chr13:111249550-111250200	13	111249550	111250200		rs389541	-2.175	rs7999799	0.027344	-3.092	1.04545	27	1	top1	0.044	0.0093	-1.04545	0.296
analysis/predict/WEIGHTS//chr13:111358300-111358900.wgt.RDat	chr13:111358300-111358900	13	111358300	111358900		rs7991766	-0.234	rs2165418	0.044795	-1.183	-0.07447	13	1	top1.qtl	0.04	0.012	0.07447	0.940638
analysis/predict/WEIGHTS//chr13:111365300-111365650.wgt.RDat	chr13:111365300-111365650	13	111365300	111365650		rs7991766	-0.234	rs7991766	0.188615	0.744	-0.23404	12	1	top1.as	0.2597	0.0039	-0.2	0.841481
analysis/predict/WEIGHTS//chr13:111479200-111479950.wgt.RDat	chr13:111479200-111479950	13	111479200	111479950		rs6492317	-1.894	rs9588277	0.038983	3.828	-1.4811	26	6	lasso	0.218	1e-08	-0.15904	0.873637
analysis/predict/WEIGHTS//chr13:111567350-111567900.wgt.RDat	chr13:111567350-111567900	13	111567350	111567900		rs2391883	2.709	rs9521988	-0.00672	-2.122	0.69663	24	10	lasso.as	0.1252	0.011	1.6166	0.105954
analysis/predict/WEIGHTS//chr13:111899750-111900550.wgt.RDat	chr13:111899750-111900550	13	111899750	111900550		rs4773339	-1.659	rs9522168	-0.071426	-1.736	0.92593	20	1	top1.as	0.046	0.0079	-1.51807	0.128997
analysis/predict/WEIGHTS//chr13:112666150-112666700.wgt.RDat	chr13:112666150-112666700	13	112666150	112666700		rs942341	-3.462	rs2031293	-0.013162	-1.513	3.3625	15	1	top1.qtl	0.055	0.0038	-1.20968	0.226402
analysis/predict/WEIGHTS//chr13:113414500-113415400.wgt.RDat	chr13:113414500-113415400	13	113414500	113415400		rs385656	-0.867	rs385656	-0.008787	-3.011	-0.86726	26	1	top1.qtl	0.062	0.0023	0.7807	0.434978
analysis/predict/WEIGHTS//chr13:114301700-114302250.wgt.RDat	chr13:114301700-114302250	13	114301700	114302250		rs9324255	2.174	rs9577286	0.117389	-3.155	-0.84337	19	1	top1.qtl	0.084	0.00044	0.59375	0.552679
analysis/predict/WEIGHTS//chr13:114739850-114740700.wgt.RDat	chr13:114739850-114740700	13	114739850	114740700		rs4381470	-0.75	rs3895392	-0.021159	-1.62	0.10714	11	1	top1.as	0.11	0.015	-0.36667	0.713867
analysis/predict/WEIGHTS//chr13:114781000-114781400.wgt.RDat	chr13:114781000-114781400	13	114781000	114781400		rs12875472	1.333	rs7988799	-0.023282	3.345	0.11905	15	1	top1	0.058	0.0031	0.11905	0.905
analysis/predict/WEIGHTS//chr13:20684400-20684900.wgt.RDat	chr13:20684400-20684900	13	20684400	20684900		rs9509040	3.578	rs9509040	0.044652	2.72	3.57831	12	1	top1	0.037	0.015	3.57831	0.000346
analysis/predict/WEIGHTS//chr13:21050450-21050950.wgt.RDat	chr13:21050450-21050950	13	21050450	21050950		rs9550656	2.333	rs4770041	-0.069797	-2.196	0.26744	29	1	top1.as	0.4343	0.012	0.26904	0.787902
analysis/predict/WEIGHTS//chr13:21057250-21057600.wgt.RDat	chr13:21057250-21057600	13	21057250	21057600		rs9552217	2.506	rs9550652	0.028389	-1.115	-0.71134	32	1	top1.as	0.5012	0.0056	-2.10843	0.034994
analysis/predict/WEIGHTS//chr13:21417650-21418600.wgt.RDat	chr13:21417650-21418600	13	21417650	21418600		rs2065888	0.656	rs9315905	0.138543	-4.741	-0.1275	22	3	lasso.plasma	0.221	0.002	0.02767	0.977929
analysis/predict/WEIGHTS//chr13:21607400-21608500.wgt.RDat	chr13:21607400-21608500	13	21607400	21608500		rs1887894	-1.979	rs4770094	-0.022367	-3.279	-0.7582	23	5	lasso.plasma	0.082	0.00053	0.65436	0.51288
analysis/predict/WEIGHTS//chr13:21738500-21739200.wgt.RDat	chr13:21738500-21739200	13	21738500	21739200		rs2281914	-1.688	rs7330822	-0.033526	2.407	-0.2541	26	1	top1.qtl	0.043	0.0096	-0.70652	0.479864
analysis/predict/WEIGHTS//chr13:21947500-21947950.wgt.RDat	chr13:21947500-21947950	13	21947500	21947950		rs17583073	-2.485	rs9509667	0.399332	-4.911	-0.01053	24	1	top1	0.093	0.00022	0.01053	0.992
analysis/predict/WEIGHTS//chr13:22033350-22033800.wgt.RDat	chr13:22033350-22033800	13	22033350	22033800		rs9552432	1.99	rs9506679	-0.038398	-1.525	1.48148	15	1	top1.as	0.2087	0.0098	0.21186	0.832213
analysis/predict/WEIGHTS//chr13:22177850-22178500.wgt.RDat	chr13:22177850-22178500	13	22177850	22178500		rs1208399	-1.299	rs1200032	0.281973	1.075	0.05021	17	1	top1	0.282	0.011	0.05021	0.96
analysis/predict/WEIGHTS//chr13:24037200-24037750.wgt.RDat	chr13:24037200-24037750	13	24037200	24037750		rs9580631	2.656	rs4770447	-0.052986	2.396	0.34906	32	1	top1.qtl	0.057	0.0035	0.34906	0.727047
analysis/predict/WEIGHTS//chr13:24062450-24063200.wgt.RDat	chr13:24062450-24063200	13	24062450	24063200		rs17078809	2.304	rs4770455	0.080304	3.478	-1.20879	35	1	top1	0.041	0.011	-1.20879	0.227
analysis/predict/WEIGHTS//chr13:24084750-24085050.wgt.RDat	chr13:24084750-24085050	13	24084750	24085050		rs9317744	1.618	rs17390122	-0.026958	1.593	-0.73944	36	1	top1.qtl	0.045	0.0086	-0.73944	0.459642
analysis/predict/WEIGHTS//chr13:24296600-24297250.wgt.RDat	chr13:24296600-24297250	13	24296600	24297250		rs9317994	1.5	rs1536299	0.116989	2.62	0.8617	25	1	top1.as	0.2054	0.0003	0.8617	0.388852
analysis/predict/WEIGHTS//chr13:24307800-24308250.wgt.RDat	chr13:24307800-24308250	13	24307800	24308250		rs2148235	-1.602	rs12866705	-0.032268	-2.271	0.8947	30	7	lasso.plasma	0.123	2.2e-05	0.54613	0.584979
analysis/predict/WEIGHTS//chr13:24323000-24323600.wgt.RDat	chr13:24323000-24323600	13	24323000	24323600		rs2148235	-1.602	rs1108152	-0.00324	-3.713	-1.21348	26	4	lasso.as	0.048	0.0066	0.2132	0.831192
analysis/predict/WEIGHTS//chr13:24352950-24353600.wgt.RDat	chr13:24352950-24353600	13	24352950	24353600		rs2148235	-1.602	rs7322274	0.045672	3.526	0.79268	24	1	top1.as	0.0902	0.00028	0.79268	0.427963
analysis/predict/WEIGHTS//chr13:24362600-24363300.wgt.RDat	chr13:24362600-24363300	13	24362600	24363300		rs7319884	-1.476	rs7322274	-0.068668	2.681	0.79268	25	1	top1.qtl	0.118	3.2e-05	0.79268	0.427963
analysis/predict/WEIGHTS//chr13:24394200-24395000.wgt.RDat	chr13:24394200-24395000	13	24394200	24395000		rs2312561	-1.585	rs7995933	0.108295	0.769	0.78448	23	1	top1.qtl	0.044	0.0087	0.58621	0.557736
analysis/predict/WEIGHTS//chr13:24489500-24489900.wgt.RDat	chr13:24489500-24489900	13	24489500	24489900		rs9553094	1.683	rs9510934	0.076267	5.407	-0.0108	35	14	lasso.plasma	0.14	5e-06	-0.06499	0.948178
analysis/predict/WEIGHTS//chr13:24684100-24684550.wgt.RDat	chr13:24684100-24684550	13	24684100	24684550		rs2104257	1.738	rs17080021	-0.062355	2.176	0.6	60	1	top1.as	0.3223	0.01	0.6	0.548506
analysis/predict/WEIGHTS//chr13:24686400-24687050.wgt.RDat	chr13:24686400-24687050	13	24686400	24687050		rs2104257	1.738	rs17080016	0.087541	-3.294	0.51163	58	1	top1.as	0.1755	0.0058	0.79762	0.425092
analysis/predict/WEIGHTS//chr13:24768550-24769150.wgt.RDat	chr13:24768550-24769150	13	24768550	24769150		rs2760364	-2.12	rs2793484	-0.018628	2.397	-0.96078	49	1	top1.qtl	0.042	0.011	-0.96078	0.336661
analysis/predict/WEIGHTS//chr13:25165550-25166400.wgt.RDat	chr13:25165550-25166400	13	25165550	25166400		rs9581121	-0.774	rs7983919	-0.043357	-3.134	0.6747	15	10	lasso	0.129	1.4e-05	-0.71369	0.475419
analysis/predict/WEIGHTS//chr13:25234350-25234750.wgt.RDat	chr13:25234350-25234750	13	25234350	25234750		rs7325426	-1.768	rs943051	0.52219	-3.538	-0.40323	44	6	lasso.as	0.6	2.9e-05	-0.1106	0.911941
analysis/predict/WEIGHTS//chr13:26068150-26069550.wgt.RDat	chr13:26068150-26069550	13	26068150	26069550		rs7322494	1.75	rs7333546	0.207439	4.356	1.3186	14	3	lasso	0.2492	0.00084	1.32181	0.18623
analysis/predict/WEIGHTS//chr13:26083900-26084400.wgt.RDat	chr13:26083900-26084400	13	26083900	26084400		rs4769426	-0.758	rs7337541	-0.040304	-2.634	0.11765	11	1	top1	0.05	0.0058	-0.11765	0.906
analysis/predict/WEIGHTS//chr13:26607950-26608500.wgt.RDat	chr13:26607950-26608500	13	26607950	26608500		rs6491097	2.085	rs7322437	-0.064081	1.706	0.57576	42	1	top1.qtl	0.038	0.015	-0.46078	0.644954
analysis/predict/WEIGHTS//chr13:27596850-27597350.wgt.RDat	chr13:27596850-27597350	13	27596850	27597350		rs7336290	-1.488	rs2479563	-0.009081	2.016	-0.39759	41	1	top1.qtl	0.077	0.00076	-0.39759	0.690932
analysis/predict/WEIGHTS//chr13:28000100-28000750.wgt.RDat	chr13:28000100-28000750	13	28000100	28000750		rs11619784	2.862	rs2760901	0.147288	-5.696	1.10976	32	1	top1	0.19	7.8e-08	-1.10976	0.267
analysis/predict/WEIGHTS//chr13:28154150-28154650.wgt.RDat	chr13:28154150-28154650	13	28154150	28154650		rs1886204	1.14	rs1575523	0.08606	3.871	-0.01176	13	1	top1	0.097	0.00017	-0.01176	0.991
analysis/predict/WEIGHTS//chr13:28609400-28609950.wgt.RDat	chr13:28609400-28609950	13	28609400	28609950		rs7327579	1.61	rs2491223	0.22862	1.286	0.11224	33	1	top1.as	0.2889	0.0086	1.53595	0.124551
analysis/predict/WEIGHTS//chr13:29459250-29459950.wgt.RDat	chr13:29459250-29459950	13	29459250	29459950		rs3001955	-2.354	rs1161457	-0.062497	-0.945	-1.58929	13	1	top1	0.046	0.0077	1.58929	0.112
analysis/predict/WEIGHTS//chr13:30492800-30493400.wgt.RDat	chr13:30492800-30493400	13	30492800	30493400		rs11147402	-1.816	rs9550507	0.07595	-2.334	0.94286	45	15	lasso.as	0.4678	0.00018	-0.5028	0.615135
analysis/predict/WEIGHTS//chr13:31038200-31039050.wgt.RDat	chr13:31038200-31039050	13	31038200	31039050		rs4145277	-2.268	rs9551926	-0.005149	-1.323	1.70492	20	1	top1	0.0662	0.0017	-1.70492	0.0882
analysis/predict/WEIGHTS//chr13:31317450-31318200.wgt.RDat	chr13:31317450-31318200	13	31317450	31318200		rs3935645	3.235	rs11841107	0.084175	-1.259	1.43333	48	1	top1.as	0.2264	0.0062	-0.95402	0.340072
analysis/predict/WEIGHTS//chr13:31409500-31410150.wgt.RDat	chr13:31409500-31410150	13	31409500	31410150		rs11147445	1.664	rs12876893	0.085286	-2.792	-0.65934	21	1	top1.as	0.2541	0.0099	-1.66412	0.096088
analysis/predict/WEIGHTS//chr13:31499700-31500400.wgt.RDat	chr13:31499700-31500400	13	31499700	31500400		rs1002036	1.639	rs2297394	0.129365	3.807	0.56383	24	1	top1	0.063	0.0021	0.56383	0.573
analysis/predict/WEIGHTS//chr13:31530700-31531450.wgt.RDat	chr13:31530700-31531450	13	31530700	31531450		rs9533458	2.431	rs12430079	0.134765	5.322	-0.41111	31	1	top1	0.15	3.5e-06	-0.41111	0.681
analysis/predict/WEIGHTS//chr13:31696250-31696700.wgt.RDat	chr13:31696250-31696700	13	31696250	31696700		rs6561999	-2.236	rs912294	0.195623	1.56	1.09278	39	1	top1.as	0.292	0.0056	1.09278	0.27449
analysis/predict/WEIGHTS//chr13:32501050-32501750.wgt.RDat	chr13:32501050-32501750	13	32501050	32501750		rs203418	-2.006	rs7986448	-0.003727	-1.493	-0.27225	28	1	top1.as	0.046	0.0076	0.86188	0.388755
analysis/predict/WEIGHTS//chr13:32539700-32540100.wgt.RDat	chr13:32539700-32540100	13	32539700	32540100		rs203418	-2.006	rs426307	0.178729	-1.838	-1.72441	28	1	top1.as	0.056	0.0036	-1.86747	0.061836
analysis/predict/WEIGHTS//chr13:33042300-33042950.wgt.RDat	chr13:33042300-33042950	13	33042300	33042950		rs169600	1.245	rs1207948	-0.019803	2.667	0.20988	10	1	top1.qtl	0.0396	0.013	0.20988	0.833764
analysis/predict/WEIGHTS//chr13:33202700-33203400.wgt.RDat	chr13:33202700-33203400	13	33202700	33203400		rs7335992	1.837	rs2301389	0.32601	5.056	-1.6667	10	2	lasso	0.36	0.00021	-1.66616	0.095681
analysis/predict/WEIGHTS//chr13:33558650-33559600.wgt.RDat	chr13:33558650-33559600	13	33558650	33559600		rs7984515	2.792	rs408642	-0.039928	-1.849	0.85714	47	1	top1.qtl	0.047	0.0073	1.32	0.186835
analysis/predict/WEIGHTS//chr13:33622150-33622600.wgt.RDat	chr13:33622150-33622600	13	33622150	33622600		rs598413	2.402	rs17763040	0.171647	-3.384	-0.99187	38	1	top1	0.172	0.0057	0.99187	0.321
analysis/predict/WEIGHTS//chr13:33755250-33755800.wgt.RDat	chr13:33755250-33755800	13	33755250	33755800		rs797190	-3.042	rs7335916	-0.043245	2.089	1.06667	47	1	top1.qtl	0.0807	0.00057	0.02469	0.980301
analysis/predict/WEIGHTS//chr13:33768950-33769450.wgt.RDat	chr13:33768950-33769450	13	33768950	33769450		rs797190	-3.042	rs9527207	0.580718	-2.807	-1.41346	48	1	top1	0.5807	0.0012	1.41346	0.158
analysis/predict/WEIGHTS//chr13:34053450-34053950.wgt.RDat	chr13:34053450-34053950	13	34053450	34053950		rs9315215	2.205	rs4943112	0.007914	3.532	2.20482	13	1	top1	0.0835	0.00046	2.20482	0.0275
analysis/predict/WEIGHTS//chr13:34319150-34320200.wgt.RDat	chr13:34319150-34320200	13	34319150	34320200		rs17079721	-2.242	rs9528004	0.012657	1.377	0.53571	35	1	top1.qtl	0.0897	0.013	0.23595	0.813468
analysis/predict/WEIGHTS//chr13:34721900-34722350.wgt.RDat	chr13:34721900-34722350	13	34721900	34722350		rs4941784	-2.416	rs9598629	-0.033332	1.763	-1.70476	37	1	top1	0.064	0.0019	-1.70476	0.0882
analysis/predict/WEIGHTS//chr13:35271950-35272500.wgt.RDat	chr13:35271950-35272500	13	35271950	35272500		rs9599474	1.589	rs1508487	-0.049448	2.408	0.44681	29	1	top1.qtl	0.0372	0.015	0.44681	0.655013
analysis/predict/WEIGHTS//chr13:35400750-35401800.wgt.RDat	chr13:35400750-35401800	13	35400750	35401800		rs9285105	-1.989	rs9599703	0.174808	-1.347	0.68966	21	1	top1	0.1748	0.0043	-0.68966	0.49
analysis/predict/WEIGHTS//chr13:36286850-36287400.wgt.RDat	chr13:36286850-36287400	13	36286850	36287400		rs9545075	3.131	rs4943327	-0.026796	-1.636	-1.4881	38	1	top1	0.05	0.0058	1.4881	0.137
analysis/predict/WEIGHTS//chr13:36334750-36335500.wgt.RDat	chr13:36334750-36335500	13	36334750	36335500		rs9574551	-1.887	rs11843701	0.541871	5.323	-0.82143	27	1	top1.as	0.14	4.3e-06	-1.15842	0.246693
analysis/predict/WEIGHTS//chr13:36392450-36393050.wgt.RDat	chr13:36392450-36393050	13	36392450	36393050		rs9574699	-2.8	rs9545434	0.547382	6.344	-2.11111	36	1	top1	0.24	1.8e-09	-2.11111	0.0348
analysis/predict/WEIGHTS//chr13:36432600-36433450.wgt.RDat	chr13:36432600-36433450	13	36432600	36433450		rs1926452	-1.815	rs7327494	-0.011936	-1.823	0.52	33	1	top1.qtl	0.095	0.00019	1.01786	0.308744
analysis/predict/WEIGHTS//chr13:36538600-36539350.wgt.RDat	chr13:36538600-36539350	13	36538600	36539350		rs1170985	-1.82	rs9545925	0.263918	4.9	-1.5059	23	7	lasso.plasma	0.1	0.00012	-1.08577	0.277582
analysis/predict/WEIGHTS//chr13:36842050-36842500.wgt.RDat	chr13:36842050-36842500	13	36842050	36842500		rs1170940	1.083	rs11620284	0.114693	-2.468	-0.39216	23	1	top1.qtl	0.045	0.0082	-0.05051	0.95972
analysis/predict/WEIGHTS//chr13:37869050-37870200.wgt.RDat	chr13:37869050-37870200	13	37869050	37870200		rs1998566	2.86	rs9547786	-0.07018	2.556	-0.9	24	1	lasso.as	0.071	0.0012	-0.9	0.36812
analysis/predict/WEIGHTS//chr13:37978200-37978850.wgt.RDat	chr13:37978200-37978850	13	37978200	37978850		rs2146403	2.435	rs9547847	0.250425	-6.331	-2.09302	32	1	top1.qtl	0.24	1.3e-09	2.09302	0.036347
analysis/predict/WEIGHTS//chr13:40109550-40110000.wgt.RDat	chr13:40109550-40110000	13	40109550	40110000		rs4943673	1.607	rs2324338	-0.09937	1.985	1	38	1	lasso.as	0.039	0.013	1.6075	0.107949
analysis/predict/WEIGHTS//chr13:40381850-40382300.wgt.RDat	chr13:40381850-40382300	13	40381850	40382300		rs9603626	1.785	rs9566478	-0.0374	-2.132	0.2069	20	1	top1.as	0.257	0.013	-0.26471	0.791236
analysis/predict/WEIGHTS//chr13:41020550-41021100.wgt.RDat	chr13:41020550-41021100	13	41020550	41021100		rs2096445	-1.95	rs9577035	0.051576	2.654	-0.37895	34	1	top1.as	0.0381	0.014	-0.37895	0.704727
analysis/predict/WEIGHTS//chr13:41222050-41222700.wgt.RDat	chr13:41222050-41222700	13	41222050	41222700		rs17061503	1.575	rs8001443	0.099247	-3.264	1.47674	16	1	top1	0.045	0.0084	-1.47674	0.14
analysis/predict/WEIGHTS//chr13:42325900-42326550.wgt.RDat	chr13:42325900-42326550	13	42325900	42326550		rs7319641	-1.122	rs9594623	0.033322	3.629	-0.05882	19	1	top1	0.089	0.0003	-0.05882	0.953
analysis/predict/WEIGHTS//chr13:42614450-42614750.wgt.RDat	chr13:42614450-42614750	13	42614450	42614750		rs10507505	1.722	rs7993579	0.129042	-1.043	1.58929	21	1	top1.qtl	0.072	0.0011	1.625	0.104163
analysis/predict/WEIGHTS//chr13:43878550-43879000.wgt.RDat	chr13:43878550-43879000	13	43878550	43879000		rs745334	-1.654	rs1924632	0.005493	4.426	1.4699	28	3	lasso	0.1	9.5e-05	1.06441	0.287143
analysis/predict/WEIGHTS//chr13:44031100-44031700.wgt.RDat	chr13:44031100-44031700	13	44031100	44031700		rs1853404	-1.848	rs1924625	-0.015535	-2.497	-0.07563	34	1	top1.as	0.28	0.0081	-0.05085	0.959447
analysis/predict/WEIGHTS//chr13:44806250-44806700.wgt.RDat	chr13:44806250-44806700	13	44806250	44806700		rs2246597	-1.815	rs2248425	0.039026	-2.819	0.86905	34	1	top1.as	0.051	0.0053	-0.10976	0.912603
analysis/predict/WEIGHTS//chr13:45333750-45334550.wgt.RDat	chr13:45333750-45334550	13	45333750	45334550		rs7334540	1.98	rs1415641	-0.00836	-2.993	0.2381	24	1	top1.qtl	0.065	0.0019	0.03614	0.971167
analysis/predict/WEIGHTS//chr13:45444450-45445250.wgt.RDat	chr13:45444450-45445250	13	45444450	45445250		rs4942372	-1.571	rs12868700	0.189018	4.069	-0.1957	20	4	lasso.plasma	0.29012	0.0015	0.51287	0.608045
analysis/predict/WEIGHTS//chr13:45493450-45494050.wgt.RDat	chr13:45493450-45494050	13	45493450	45494050		rs1175390	1.276	rs12865097	0.379514	3.018	-0.85821	23	1	top1	0.3795	0.00013	-0.85821	0.391
analysis/predict/WEIGHTS//chr13:45495750-45497150.wgt.RDat	chr13:45495750-45497150	13	45495750	45497150		rs1175390	1.276	rs12865097	-0.021402	1.81	-0.85821	22	1	top1.qtl	0.039	0.013	-0.43373	0.664481
analysis/predict/WEIGHTS//chr13:45914250-45915050.wgt.RDat	chr13:45914250-45915050	13	45914250	45915050		rs11619167	1.177	rs11619167	-0.06115	-1.293	1.1773	17	1	top1.qtl	0.087	0.00036	-0.85542	0.392318
analysis/predict/WEIGHTS//chr13:46694250-46694650.wgt.RDat	chr13:46694250-46694650	13	46694250	46694650		rs2181617	2.025	rs2025736	0.028466	-4.185	-0.7368	27	14	lasso.plasma	0.08	0.00061	0.82271	0.410675
analysis/predict/WEIGHTS//chr13:46716850-46717850.wgt.RDat	chr13:46716850-46717850	13	46716850	46717850		rs4258501	1.781	rs11841954	0.175546	-2.867	-0.59804	31	1	top1	0.176	0.0089	0.59804	0.55
analysis/predict/WEIGHTS//chr13:46723550-46724000.wgt.RDat	chr13:46723550-46724000	13	46723550	46724000		rs4258501	1.781	rs12583876	0.05713	-2.609	-0.19802	30	6	lasso.as	0.2961	0.014	1.212	0.225526
analysis/predict/WEIGHTS//chr13:48611700-48612400.wgt.RDat	chr13:48611700-48612400	13	48611700	48612400		rs840434	2.455	rs9595835	-0.022837	-0.967	1.39604	14	1	top1.as	0.4682	0.0014	1.37179	0.170129
analysis/predict/WEIGHTS//chr13:48698000-48698450.wgt.RDat	chr13:48698000-48698450	13	48698000	48698450		rs9568015	1.837	rs9285165	0.022419	-4.62	1.75962	25	1	top1.qtl	0.202	3.7e-08	-1.75962	0.078472
analysis/predict/WEIGHTS//chr13:48806400-48807300.wgt.RDat	chr13:48806400-48807300	13	48806400	48807300		rs12100135	0.956	rs3818455	-0.032855	-3.46	0.17204	11	1	top1.qtl	0.052	0.0049	-0.47778	0.632808
analysis/predict/WEIGHTS//chr13:49672250-49672800.wgt.RDat	chr13:49672250-49672800	13	49672250	49672800		rs12867475	-0.952	rs7333097	0.417737	-0.543	0.60241	16	1	top1	0.4177	0.00049	-0.60241	0.547
analysis/predict/WEIGHTS//chr13:49964500-49964900.wgt.RDat	chr13:49964500-49964900	13	49964500	49964900		rs6420299	-1.152	rs8002829	-0.047582	-3.642	-1.06024	20	1	top1	0.113	4.6e-05	1.06024	0.289
analysis/predict/WEIGHTS//chr13:50134350-50134850.wgt.RDat	chr13:50134350-50134850	13	50134350	50134850		rs2038881	-2.176	rs1536192	0.040477	1.191	-1.42593	39	1	top1.as	0.3973	0.0022	1.93421	0.053087
analysis/predict/WEIGHTS//chr13:50158700-50159250.wgt.RDat	chr13:50158700-50159250	13	50158700	50159250		rs2038881	-2.176	rs17073145	0.212737	3.359	-0.71171	34	1	top1.qtl	0.2487	0.0018	-0.71171	0.476643
analysis/predict/WEIGHTS//chr13:50171250-50172000.wgt.RDat	chr13:50171250-50172000	13	50171250	50172000		rs1198422	-1.934	rs7332010	0.134111	4.512	-0.5152	24	11	lasso.plasma	0.067	0.0016	0.08316	0.933726
analysis/predict/WEIGHTS//chr13:50176050-50176650.wgt.RDat	chr13:50176050-50176650	13	50176050	50176650		rs1198422	-1.934	rs7331252	0.006875	3.368	-0.35135	26	1	top1	0.0719	0.0011	-0.35135	0.725
analysis/predict/WEIGHTS//chr13:50305850-50306450.wgt.RDat	chr13:50305850-50306450	13	50305850	50306450		rs1407439	2.944	rs9535310	0.046281	-1.59	0.68103	12	1	top1.qtl	0.067	0.0016	-0.68103	0.49585
analysis/predict/WEIGHTS//chr13:50349600-50350100.wgt.RDat	chr13:50349600-50350100	13	50349600	50350100		rs9535343	3.247	rs3742096	0.175269	5.42	3.1429	13	5	lasso.plasma	0.24	9.6e-10	3.05023	0.002287
analysis/predict/WEIGHTS//chr13:50887600-50888050.wgt.RDat	chr13:50887600-50888050	13	50887600	50888050		rs806308	-2.877	rs2740532	0.038722	-2.626	1.57752	15	1	top1.qtl	0.041	0.011	-1.57752	0.114676
analysis/predict/WEIGHTS//chr13:51093850-51094450.wgt.RDat	chr13:51093850-51094450	13	51093850	51094450		rs1630605	4	rs9316500	0.37432	-5.678	0.46591	26	1	top1	0.2	3.2e-08	-0.46591	0.641
analysis/predict/WEIGHTS//chr13:51690000-51690550.wgt.RDat	chr13:51690000-51690550	13	51690000	51690550		rs927863	-3.272	rs7997166	0.243156	-3.115	0.43636	34	1	top1.as	0.053	0.0045	-1.76087	0.07826
analysis/predict/WEIGHTS//chr13:51898250-51899100.wgt.RDat	chr13:51898250-51899100	13	51898250	51899100		rs4941696	-2.155	rs927608	-0.096376	2.386	1.78313	20	1	top1.as	0.039	0.013	-0.42446	0.67123
analysis/predict/WEIGHTS//chr13:52032600-52033300.wgt.RDat	chr13:52032600-52033300	13	52032600	52033300		rs9535674	-2.24	rs7989850	0.504743	-6.877	-2.0187	11	9	lasso.plasma	0.35	4.6e-14	1.74309	0.081318
analysis/predict/WEIGHTS//chr13:52608800-52609700.wgt.RDat	chr13:52608800-52609700	13	52608800	52609700		rs1122934	-1.773	rs9526825	0.272235	4.935	-0.0909	18	3	lasso	0.289	0.00012	-0.79739	0.425224
analysis/predict/WEIGHTS//chr13:54421500-54422250.wgt.RDat	chr13:54421500-54422250	13	54421500	54422250		rs7333301	-1.362	rs9596858	0.512086	-7.83	-0.29091	19	1	top1.qtl	0.44	1.8e-18	0.29091	0.771121
analysis/predict/WEIGHTS//chr13:62614850-62615400.wgt.RDat	chr13:62614850-62615400	13	62614850	62615400		rs17060765	2.212	rs7326502	-0.022962	1.607	1.37931	24	1	top1.as	0.19	0.0074	1.37931	0.167799
analysis/predict/WEIGHTS//chr13:63084900-63085450.wgt.RDat	chr13:63084900-63085450	13	63084900	63085450		rs17061417	2.434	rs430603	0.465198	4.722	-1.90909	12	1	top1.as	0.089	0.00031	-1.90909	0.05625
analysis/predict/WEIGHTS//chr13:63087750-63088500.wgt.RDat	chr13:63087750-63088500	13	63087750	63088500		rs17061417	2.434	rs430603	0.238006	5.299	-1.90909	13	1	top1.qtl	0.18	1.7e-07	-1.90909	0.05625
analysis/predict/WEIGHTS//chr13:63105600-63106100.wgt.RDat	chr13:63105600-63106100	13	63105600	63106100		rs1445204	-1.966	rs310919	0.03871	-2.934	1.85185	12	1	top1	0.04	0.012	-1.85185	0.064
analysis/predict/WEIGHTS//chr13:64007850-64008300.wgt.RDat	chr13:64007850-64008300	13	64007850	64008300		rs9570890	-2.47	rs9592274	0.185208	2.961	1.53012	30	1	top1.qtl	0.2282	0.011	1.53012	0.125987
analysis/predict/WEIGHTS//chr13:64725950-64726500.wgt.RDat	chr13:64725950-64726500	13	64725950	64726500		rs4884549	0.969	rs1858090	0.125194	-4.813	-0.59756	13	1	top1.qtl	0.1482	3.1e-06	0.96896	0.332564
analysis/predict/WEIGHTS//chr13:66713250-66713900.wgt.RDat	chr13:66713250-66713900	13	66713250	66713900		rs7327643	-1.683	rs7327643	0.262987	-4.415	-1.68293	29	1	top1.as	0.079	0.00065	1.68293	0.092389
analysis/predict/WEIGHTS//chr13:68919700-68920450.wgt.RDat	chr13:68919700-68920450	13	68919700	68920450		rs12585265	-2.075	rs12585265	0.055042	-0.671	-2.075	12	12	lasso	0.048	0.0067	1.04793	0.294671
analysis/predict/WEIGHTS//chr13:69352000-69352450.wgt.RDat	chr13:69352000-69352450	13	69352000	69352450		rs9541536	1.526	rs9541554	-0.035138	-2.78	0.1724	25	5	lasso.plasma	0.043	0.0097	0.19947	0.841897
analysis/predict/WEIGHTS//chr13:69878800-69879350.wgt.RDat	chr13:69878800-69879350	13	69878800	69879350		rs9529561	-1.409	rs9283087	0.28084	-4.247	0.34	16	1	top1	0.061	0.0026	-0.34	0.734
analysis/predict/WEIGHTS//chr13:70963000-70963600.wgt.RDat	chr13:70963000-70963600	13	70963000	70963600		rs4605034	-1.109	rs7990185	-0.032403	-2.404	-0.3704	26	5	lasso	0.1846	0.015	0.97442	0.329849
analysis/predict/WEIGHTS//chr13:71061500-71062200.wgt.RDat	chr13:71061500-71062200	13	71061500	71062200		rs9572476	-2.294	rs1930887	0.295628	-2.143	-0.4228	15	12	lasso	0.529	0.0062	0.74446	0.4566
analysis/predict/WEIGHTS//chr13:73534600-73535200.wgt.RDat	chr13:73534600-73535200	13	73534600	73535200		rs9573073	3.733	rs7982847	0.025628	-0.893	-1.23711	4	1	top1.as	0.057	0.0034	-1.52326	0.127694
analysis/predict/WEIGHTS//chr13:74303050-74303650.wgt.RDat	chr13:74303050-74303650	13	74303050	74303650		rs11839075	2.551	rs11839075	0.016133	-1.566	2.55128	29	1	top1.qtl	0.05937	0.0028	-0.33784	0.735485
analysis/predict/WEIGHTS//chr13:74720050-74720650.wgt.RDat	chr13:74720050-74720650	13	74720050	74720650		rs4885156	-1.691	rs9530283	0.078077	-5.329	1.6491	36	6	lasso.plasma	0.223	6.4e-09	-1.75923	0.078538
analysis/predict/WEIGHTS//chr13:74939850-74940450.wgt.RDat	chr13:74939850-74940450	13	74939850	74940450		rs1931932	2.024	rs12585408	0.266265	-1.217	1.85714	21	1	top1	0.2663	0.0083	-1.85714	0.0633
analysis/predict/WEIGHTS//chr13:74994650-74995100.wgt.RDat	chr13:74994650-74995100	13	74994650	74995100		rs1931950	2.687	rs9573384	0.058265	3.574	-1.7262	32	11	lasso.plasma	0.077	0.00078	-2.14847	0.031677
analysis/predict/WEIGHTS//chr13:75876100-75876550.wgt.RDat	chr13:75876100-75876550	13	75876100	75876550		rs1560540	2.987	rs507901	0.290969	3.996	1.56322	34	1	top1.qtl	0.05	0.0056	1.56322	0.118001
analysis/predict/WEIGHTS//chr13:76030100-76030550.wgt.RDat	chr13:76030100-76030550	13	76030100	76030550		rs17256822	-3.645	rs9543937	0.135982	-0.976	1.4625	27	1	top1.qtl	0.052	0.0051	0.16794	0.866631
analysis/predict/WEIGHTS//chr13:76184400-76185050.wgt.RDat	chr13:76184400-76185050	13	76184400	76185050		rs7321611	2.712	rs9530453	-0.064825	2.041	1.61728	18	1	top1.qtl	0.5151	0.00094	1.61728	0.105818
analysis/predict/WEIGHTS//chr13:76217250-76217950.wgt.RDat	chr13:76217250-76217950	13	76217250	76217950		rs9593109	3.494	rs9593109	0.533148	7.085	3.49398	15	1	top1	0.53	3.1e-08	3.49398	0.000476
analysis/predict/WEIGHTS//chr13:77411900-77412300.wgt.RDat	chr13:77411900-77412300	13	77411900	77412300		rs7330092	2.04	rs9544383	-0.047419	2.846	1.95604	31	1	top1.qtl	0.045	0.0082	1.96667	0.049221
analysis/predict/WEIGHTS//chr13:78197850-78198350.wgt.RDat	chr13:78197850-78198350	13	78197850	78198350		rs1323617	-2.186	rs1323617	0.426177	2.55	-2.18634	17	1	top1	0.4262	0.0019	-2.18634	0.0288
analysis/predict/WEIGHTS//chr13:78948250-78948950.wgt.RDat	chr13:78948250-78948950	13	78948250	78948950		rs1967453	-1.474	rs9574228	0.087103	3.456	-1.24074	23	1	top1.as	0.1228	0.015	-1.22222	0.221624
analysis/predict/WEIGHTS//chr13:81880000-81880500.wgt.RDat	chr13:81880000-81880500	13	81880000	81880500		rs1531575	1.244	rs1146967	0.294169	-3.403	0.37931	18	1	top1	0.294	0.012	-0.37931	0.704
analysis/predict/WEIGHTS//chr13:83010250-83010900.wgt.RDat	chr13:83010250-83010900	13	83010250	83010900		rs4885817	2.105	rs9546115	-0.029276	-3.517	0.39535	15	1	top1	0.093	0.00022	-0.39535	0.693
analysis/predict/WEIGHTS//chr13:83644900-83645700.wgt.RDat	chr13:83644900-83645700	13	83644900	83645700		rs1018010	1.504	rs9602068	0.29082	-4.174	1.28689	11	1	top1.qtl	0.348	0.00028	-1.28689	0.198133
analysis/predict/WEIGHTS//chr13:83699250-83700350.wgt.RDat	chr13:83699250-83700350	13	83699250	83700350		rs2137437	-1.494	rs2137437	0.488601	3.013	-1.49383	19	1	top1	0.489	0.0096	-1.49383	0.135
analysis/predict/WEIGHTS//chr13:84305150-84305800.wgt.RDat	chr13:84305150-84305800	13	84305150	84305800		rs17077190	1.786	rs9531506	-0.032087	-1.259	1.16038	21	1	top1.qtl	0.075	0.00087	0.63889	0.522895
analysis/predict/WEIGHTS//chr13:84781200-84781700.wgt.RDat	chr13:84781200-84781700	13	84781200	84781700		rs2094799	-2.155	rs1928920	0.008006	-3.08	1.27473	14	1	top1.qtl	0.072	0.0011	-1.27473	0.202405
analysis/predict/WEIGHTS//chr13:85821800-85822500.wgt.RDat	chr13:85821800-85822500	13	85821800	85822500		rs9547089	-2.149	rs7329244	0.091842	4.561	-1.61905	39	1	top1	0.098	0.00016	-1.61905	0.105
analysis/predict/WEIGHTS//chr13:85947250-85948000.wgt.RDat	chr13:85947250-85948000	13	85947250	85948000		rs7991509	-1.74	rs12866671	-0.014544	2.806	-1.17857	17	1	top1	0.039	0.013	-1.17857	0.239
analysis/predict/WEIGHTS//chr13:89066800-89067400.wgt.RDat	chr13:89066800-89067400	13	89066800	89067400		rs418853	-1.898	rs364426	0.172162	-4.601	1.27473	29	1	top1.as	0.12	2.7e-05	-1.27473	0.202405
analysis/predict/WEIGHTS//chr13:90166650-90167100.wgt.RDat	chr13:90166650-90167100	13	90166650	90167100		rs9588628	2.32	rs1394321	0.13372	-2.51	0.13095	14	6	lasso.as	0.243	0.012	-1.3382	0.180842
analysis/predict/WEIGHTS//chr13:90633050-90633650.wgt.RDat	chr13:90633050-90633650	13	90633050	90633650		rs12050059	-2.354	rs2805676	0.115461	3.724	0.6	21	1	top1.qtl	0.05	0.0057	0.6	0.548506
analysis/predict/WEIGHTS//chr13:90808450-90809150.wgt.RDat	chr13:90808450-90809150	13	90808450	90809150		rs12858653	-2.136	rs1491018	-0.05782	-1.329	-0.55172	21	1	top1	0.065	0.0019	0.55172	0.581
analysis/predict/WEIGHTS//chr13:91178450-91179050.wgt.RDat	chr13:91178450-91179050	13	91178450	91179050		rs1159752	2.107	rs9556031	0.154315	-3.859	0.82716	21	1	top1	0.054	0.0041	-0.82716	0.408
analysis/predict/WEIGHTS//chr13:91184900-91185750.wgt.RDat	chr13:91184900-91185750	13	91184900	91185750		rs1159752	2.107	rs7996193	0.139701	6.19	1.06604	24	1	top1	0.17	4.2e-07	1.06604	0.286
analysis/predict/WEIGHTS//chr13:91519550-91520000.wgt.RDat	chr13:91519550-91520000	13	91519550	91520000		rs7990971	-1.992	rs9523167	0.091596	-3.524	0.72093	28	1	top1.as	0.052	0.0048	-0.74419	0.456764
analysis/predict/WEIGHTS//chr13:92001250-92001500.wgt.RDat	chr13:92001250-92001500	13	92001250	92001500		rs17667973	3.183	rs7320982	-0.058792	-1.581	1.54839	17	1	top1.qtl	0.065	0.0018	-1.54839	0.121528
analysis/predict/WEIGHTS//chr13:92177000-92177550.wgt.RDat	chr13:92177000-92177550	13	92177000	92177550		rs9589279	1.236	rs16946071	0.031762	1.615	-0.9172	18	1	top1.as	0.362	0.0018	1.23602	0.216451
analysis/predict/WEIGHTS//chr13:92449850-92450550.wgt.RDat	chr13:92449850-92450550	13	92449850	92450550		rs1854974	2.455	rs528366	0.064089	-3.529	0.14444	20	1	top1.qtl	0.09051	0.01	-0.14444	0.88515
analysis/predict/WEIGHTS//chr13:92875900-92876450.wgt.RDat	chr13:92875900-92876450	13	92875900	92876450		rs9516020	-1.388	rs9523536	0.247205	-1.194	0.26543	26	1	top1	0.247	0.013	-0.26543	0.791
analysis/predict/WEIGHTS//chr13:92993800-92994350.wgt.RDat	chr13:92993800-92994350	13	92993800	92994350		rs7985683	1.609	rs4771856	0.044823	4.062	-0.26596	24	1	top1.qtl	0.055	0.0041	-0.1413	0.88763
analysis/predict/WEIGHTS//chr13:94027800-94028250.wgt.RDat	chr13:94027800-94028250	13	94027800	94028250		rs1924384	1.53	rs2762107	0.508572	0.999	-1.41818	30	1	top1	0.509	0.001	-1.41818	0.156
analysis/predict/WEIGHTS//chr13:94381400-94382000.wgt.RDat	chr13:94381400-94382000	13	94381400	94382000		rs4366594	-2.857	rs4771878	-0.047618	-2.63	1.53012	26	1	top1.qtl	0.064	0.002	-1.51765	0.129103
analysis/predict/WEIGHTS//chr13:94388950-94389650.wgt.RDat	chr13:94388950-94389650	13	94388950	94389650		rs7995215	-3.193	rs17189229	-0.026535	1.294	1.96842	28	1	top1	0.044	0.009	1.96842	0.049
analysis/predict/WEIGHTS//chr13:95021950-95022750.wgt.RDat	chr13:95021950-95022750	13	95021950	95022750		rs1012693	1.784	rs11617002	-0.024262	1.281	-1.55479	40	1	top1	0.043	0.01	-1.55479	0.12
analysis/predict/WEIGHTS//chr13:95697700-95698300.wgt.RDat	chr13:95697700-95698300	13	95697700	95698300		rs9561773	1.741	rs3782945	0.08956	1.151	1.26	70	1	top1.qtl	0.362	0.00085	0.34118	0.732971
analysis/predict/WEIGHTS//chr13:95920150-95920800.wgt.RDat	chr13:95920150-95920800	13	95920150	95920800		rs4148424	-2.222	rs9590228	0.160245	-3.676	-1.7416	65	18	lasso.plasma	0.211	0.0015	0.57477	0.565446
analysis/predict/WEIGHTS//chr13:95937850-95938450.wgt.RDat	chr13:95937850-95938450	13	95937850	95938450		rs4148424	-2.222	rs9584288	0.026898	-2.497	-1.6742	39	4	lasso.plasma	0.0445	0.0087	1.30862	0.190664
analysis/predict/WEIGHTS//chr13:95941100-95941750.wgt.RDat	chr13:95941100-95941750	13	95941100	95941750		rs4148424	-2.222	rs9584288	0.166624	-2.833	-1.67416	40	1	top1.as	0.2432	0.0024	2.22222	0.026268
analysis/predict/WEIGHTS//chr13:95966650-95967050.wgt.RDat	chr13:95966650-95967050	13	95966650	95967050		rs12865420	-1.947	rs4773875	-0.026922	-2.209	0.72414	27	1	top1.as	0.2073	0.0046	-0.04196	0.966532
analysis/predict/WEIGHTS//chr13:96203700-96204350.wgt.RDat	chr13:96203700-96204350	13	96203700	96204350		rs9525017	-2.256	rs4773917	-0.025078	-2.61	0.40659	17	1	top1	0.063	0.0022	-0.40659	0.684
analysis/predict/WEIGHTS//chr13:96206200-96206550.wgt.RDat	chr13:96206200-96206550	13	96206200	96206550		rs9525017	-2.256	rs9652107	0.081075	-1.18	-1.2	18	1	top1	0.044	0.0094	1.2	0.23
analysis/predict/WEIGHTS//chr13:97049600-97050350.wgt.RDat	chr13:97049600-97050350	13	97049600	97050350		rs9516686	2.75	rs979231	0.032674	-3.481	2.1829	33	9	lasso	0.083	0.00047	0.23266	0.816028
analysis/predict/WEIGHTS//chr13:97644550-97645000.wgt.RDat	chr13:97644550-97645000	13	97644550	97645000		rs4771260	-2.179	rs9584467	0.510391	-0.865	-1.96386	16	1	top1	0.5104	0.0015	1.96386	0.0495
analysis/predict/WEIGHTS//chr13:98826600-98827150.wgt.RDat	chr13:98826600-98827150	13	98826600	98827150		rs628778	1.947	rs896408	0.179361	-6.457	-1.13043	20	1	top1.qtl	0.24	2.2e-09	1.13043	0.258295
analysis/predict/WEIGHTS//chr13:98859050-98859500.wgt.RDat	chr13:98859050-98859500	13	98859050	98859500		rs17269208	-1.526	rs9556897	-0.058822	-0.941	-0.44944	12	1	top1.qtl	0.1	0.00013	1.52577	0.127067
analysis/predict/WEIGHTS//chr13:98866900-98867500.wgt.RDat	chr13:98866900-98867500	13	98866900	98867500		rs17269208	-1.526	rs8002043	0.06717	2.605	0.11017	12	2	lasso.as	0.1325	0.011	-0.3139	0.753565
analysis/predict/WEIGHTS//chr13:99444450-99445050.wgt.RDat	chr13:99444450-99445050	13	99444450	99445050		rs1289320	2.093	rs9517448	-0.042727	-2.564	-0.5772	53	12	lasso.plasma	0.04757	0.0069	-0.86646	0.386236
analysis/predict/WEIGHTS//chr13:99698500-99698950.wgt.RDat	chr13:99698500-99698950	13	99698500	99698950		rs17724332	1.882	rs4772169	-0.041736	3.343	1.75294	25	1	top1.qtl	0.041	0.012	1.75294	0.079612
analysis/predict/WEIGHTS//chr14:100022100-100022550.wgt.RDat	chr14:100022100-100022550	14	100022100	100022550		rs11160524	0.782	rs2400749	0.0668	-4.311	-0.2099	26	3	lasso.plasma	0.118	3.2e-05	0.103371	0.918
analysis/predict/WEIGHTS//chr14:100037700-100038400.wgt.RDat	chr14:100037700-100038400	14	100037700	100038400		rs11160524	0.782	rs2400749	0.127	-6.798	-0.2099	28	1	top1	0.33	2.5e-13	0.2099	0.834
analysis/predict/WEIGHTS//chr14:100329850-100330400.wgt.RDat	chr14:100329850-100330400	14	100329850	100330400		rs3783324	1.766	rs1191108	0.0522	3.123	-1.48	24	1	top1	0.04	0.012	-1.48	0.139
analysis/predict/WEIGHTS//chr14:100446600-100447600.wgt.RDat	chr14:100446600-100447600	14	100446600	100447600		rs1191006	-2.318	rs7142811	-0.0476	-1.213	-0.3524	7	1	top1.qtl	0.248	0.011	2.23353	0.0255
analysis/predict/WEIGHTS//chr14:101014150-101014650.wgt.RDat	chr14:101014150-101014650	14	101014150	101014650		rs13065	-1.635	rs8006176	0.111	3.986	-1.1707	20	3	lasso.plasma	0.099	0.00014	-1.65816	0.0973
analysis/predict/WEIGHTS//chr14:102342450-102342950.wgt.RDat	chr14:102342450-102342950	14	102342450	102342950		rs1678031	-1.564	rs2749907	-0.0831	2.901	0.8854	23	8	lasso.plasma	0.049	0.0063	0.985476	0.324
analysis/predict/WEIGHTS//chr14:102414100-102415050.wgt.RDat	chr14:102414100-102415050	14	102414100	102415050		rs1678033	2.178	rs2250789	-0.0625	-2.107	0.0753	17	1	lasso	0.3365	0.0087	-0.0753	0.94
analysis/predict/WEIGHTS//chr14:103614900-103615400.wgt.RDat	chr14:103614900-103615400	14	103614900	103615400		rs8014278	-1.892	rs4906287	0.0216	1.131	-0.3	24	1	top1.qtl	0.038	0.014	-0.3	0.764
analysis/predict/WEIGHTS//chr14:104029000-104029400.wgt.RDat	chr14:104029000-104029400	14	104029000	104029400		rs12889403	2.557	rs12885878	-0.0274	1.45	-1.9897	19	1	top1	0.044	0.0091	-1.9897	0.0466
analysis/predict/WEIGHTS//chr14:104093350-104093950.wgt.RDat	chr14:104093350-104093950	14	104093350	104093950		rs12884809	2.494	rs11850979	0.165	3.744	-1.9773	15	5	lasso.as	0.1642	0.01	-0.4285	0.668
analysis/predict/WEIGHTS//chr14:104159750-104160150.wgt.RDat	chr14:104159750-104160150	14	104159750	104160150		rs4906356	2.381	rs11160757	0.463	-3.096	-1.6149	23	1	top1	0.463	0.0011	1.6149	0.106
analysis/predict/WEIGHTS//chr14:104504200-104504550.wgt.RDat	chr14:104504200-104504550	14	104504200	104504550		rs11160784	-1.788	rs11160779	0.0901	-3.335	-1.0682	13	1	top1	0.069	0.0014	1.0682	0.285
analysis/predict/WEIGHTS//chr14:105213100-105214050.wgt.RDat	chr14:105213100-105214050	14	105213100	105214050		rs4983547	3.298	rs4983543	0.0055	3.947	2.2593	25	1	top1	0.0779	0.0007	2.2593	0.0239
analysis/predict/WEIGHTS//chr14:106985450-106986200.wgt.RDat	chr14:106985450-106986200	14	106985450	106986200		rs17112863	1.345	rs4562969	-0.0287	2.384	-0.663	5	1	top1	0.038	0.015	-0.663	0.507
analysis/predict/WEIGHTS//chr14:106995150-106995750.wgt.RDat	chr14:106995150-106995750	14	106995150	106995750		rs17112863	1.345	rs10150688	0.0644	3.186	-0.9888	4	1	top1	0.043	0.0099	-0.9888	0.323
analysis/predict/WEIGHTS//chr14:106998900-106999300.wgt.RDat	chr14:106998900-106999300	14	106998900	106999300		rs17112863	1.345	rs10150688	0.72	3.423	-0.9888	4	1	top1	0.72	0.00031	-0.9888	0.323
analysis/predict/WEIGHTS//chr14:107005000-107005550.wgt.RDat	chr14:107005000-107005550	14	107005000	107005550		rs17112863	1.345	rs10150688	0.279	6.345	-0.9888	3	1	top1.as	0.19	7e-08	-0.98876	0.323
analysis/predict/WEIGHTS//chr14:20648300-20649100.wgt.RDat	chr14:20648300-20649100	14	20648300	20649100		rs1958705	2.531	rs4981802	0.128	4.72	0.7358	40	1	top1	0.17	3.7e-07	0.7358	0.462
analysis/predict/WEIGHTS//chr14:20811200-20811950.wgt.RDat	chr14:20811200-20811950	14	20811200	20811950		rs3093933	-3.645	rs2700	-0.0158	-2.727	-2.3146	33	1	top1	0.044	0.0088	2.3146	0.0206
analysis/predict/WEIGHTS//chr14:21182750-21183250.wgt.RDat	chr14:21182750-21183250	14	21182750	21183250		rs8023192	2.012	rs8020105	-0.055255	-2.176	0.4565	26	5	lasso	0.043	0.0098	-0.8447	0.398
analysis/predict/WEIGHTS//chr14:21250350-21250850.wgt.RDat	chr14:21250350-21250850	14	21250350	21250850		rs12587462	-2.394	rs10131142	-0.0397	2.11	0.2606	41	1	top1.as	0.3241	0.0014	0.26064	0.794
analysis/predict/WEIGHTS//chr14:21776150-21777300.wgt.RDat	chr14:21776150-21777300	14	21776150	21777300		rs8009098	1.417	rs10152068	-0.00228	3.587	1.375	22	1	top1.qtl	0.0974	0.00016	1.375	0.169
analysis/predict/WEIGHTS//chr14:21924200-21924700.wgt.RDat	chr14:21924200-21924700	14	21924200	21924700		rs8013500	1.942	rs11628702	-0.0218	-2.855	-0.8409	19	1	top1	0.042	0.011	0.8409	0.4
analysis/predict/WEIGHTS//chr14:22099050-22099750.wgt.RDat	chr14:22099050-22099750	14	22099050	22099750		rs10146821	-2.38	rs12586691	0.0201	-3.344	-0.6273	36	7	lasso.as	0.041	0.012	0.73	0.465
analysis/predict/WEIGHTS//chr14:22136550-22137100.wgt.RDat	chr14:22136550-22137100	14	22136550	22137100		rs11627252	2.346	rs12897485	0.439	-6.883	1.011	29	1	top1	0.32	5.6e-13	-1.011	0.312
analysis/predict/WEIGHTS//chr14:22802300-22803000.wgt.RDat	chr14:22802300-22803000	14	22802300	22803000		rs17793809	-1.649	rs4981422	-0.024938	3.18	0.3855	24	3	lasso	0.093	0.00023	0.6314	0.528
analysis/predict/WEIGHTS//chr14:23623000-23624050.wgt.RDat	chr14:23623000-23624050	14	23623000	23624050		rs10145863	2.689	rs3783436	-0.0502	1.421	0.95	24	1	top1.qtl	0.046	0.0081	-1.28713	0.198
analysis/predict/WEIGHTS//chr14:24158700-24159550.wgt.RDat	chr14:24158700-24159550	14	24158700	24159550		rs6573309	2.393	rs12883888	-0.046558	5.857	-0.4886	27	8	lasso	0.411	7.1e-17	-0.679	0.497
analysis/predict/WEIGHTS//chr14:24911350-24912300.wgt.RDat	chr14:24911350-24912300	14	24911350	24912300		rs11628866	1.678	rs1956898	-0.0322	-1.541	-0.0584	50	1	top1.as	0.1671	0.015	-0.48101	0.631
analysis/predict/WEIGHTS//chr14:25282200-25282850.wgt.RDat	chr14:25282200-25282850	14	25282200	25282850		rs8007336	-1.277	rs8018496	0.0502	3.305	-0.6145	39	1	top1.as	0.1	0.0081	0.66216	0.508
analysis/predict/WEIGHTS//chr14:25377850-25378600.wgt.RDat	chr14:25377850-25378600	14	25377850	25378600		rs17185348	2.844	rs11158959	0.311	1.843	-2	39	1	top1.qtl	0.321	0.0043	0.45098	0.652
analysis/predict/WEIGHTS//chr14:25413950-25414550.wgt.RDat	chr14:25413950-25414550	14	25413950	25414550		rs11621506	-1.63	rs17200947	0.0527	-3.829	1.5258	43	1	top1.as	0.165	0.0033	-1.41237	0.158
analysis/predict/WEIGHTS//chr14:25423300-25424100.wgt.RDat	chr14:25423300-25424100	14	25423300	25424100		rs11621506	-1.63	rs11159006	0.373	9.116	-1.2927	40	1	top1.qtl	0.56	4.3e-25	-1.26829	0.205
analysis/predict/WEIGHTS//chr14:25433700-25434300.wgt.RDat	chr14:25433700-25434300	14	25433700	25434300		rs11621506	-1.63	rs2146917	-0.0407	-1.989	1.4124	36	1	top1.qtl	0.044	0.0089	-1.41237	0.158
analysis/predict/WEIGHTS//chr14:25521500-25522100.wgt.RDat	chr14:25521500-25522100	14	25521500	25522100		rs8007052	2.011	rs17185593	0.182	3.619	1.7287	21	1	top1	0.038	0.014	1.7287	0.0839
analysis/predict/WEIGHTS//chr14:25550750-25551450.wgt.RDat	chr14:25550750-25551450	14	25550750	25551450		rs17185705	2.242	rs8008544	-0.0208	-2.881	1.0163	24	1	top1	0.061	0.0025	-1.0163	0.31
analysis/predict/WEIGHTS//chr14:25977950-25978700.wgt.RDat	chr14:25977950-25978700	14	25977950	25978700		rs17110049	1.319	rs17110049	0.00606	-2.644	1.3186	13	13	lasso.plasma	0.308	0.00039	-1.74914	0.0803
analysis/predict/WEIGHTS//chr14:26128100-26129000.wgt.RDat	chr14:26128100-26129000	14	26128100	26129000		rs10873327	1.917	rs1951071	-0.00738	-2.754	-0.5747	29	10	lasso.plasma	0.102	0.00011	-0.020313	0.984
analysis/predict/WEIGHTS//chr14:30205550-30206300.wgt.RDat	chr14:30205550-30206300	14	30205550	30206300		rs1953722	0.871	rs1953722	-0.000885	2.658	0.871	20	1	top1.as	0.038	0.015	0.87097	0.384
analysis/predict/WEIGHTS//chr14:30226500-30227400.wgt.RDat	chr14:30226500-30227400	14	30226500	30227400		rs1953722	0.871	rs11850756	-0.0166	-3.802	-0.0784	16	7	lasso.plasma	0.115	4.2e-05	0.156059	0.876
analysis/predict/WEIGHTS//chr14:30497200-30497750.wgt.RDat	chr14:30497200-30497750	14	30497200	30497750		rs225994	1.695	rs225983	0.131	-4.372	-0.1798	25	1	top1	0.091	0.00026	0.1798	0.857
analysis/predict/WEIGHTS//chr14:31633150-31633800.wgt.RDat	chr14:31633150-31633800	14	31633150	31633800		rs8018508	1.405	rs11845860	-0.0712	2.153	-0.6529	16	1	top1.as	0.3826	0.011	-0.32258	0.747
analysis/predict/WEIGHTS//chr14:32296500-32296950.wgt.RDat	chr14:32296500-32296950	14	32296500	32296950		rs10143774	-1.268	rs10143774	-0.0866	-2.656	-1.268	20	1	top1.qtl	0.053	0.0045	1.26804	0.205
analysis/predict/WEIGHTS//chr14:32339850-32340450.wgt.RDat	chr14:32339850-32340450	14	32339850	32340450		rs1889387	-1.627	rs10162318	0.104	3.145	0.6356	32	1	top1.as	0.369	0.013	0.83505	0.404
analysis/predict/WEIGHTS//chr14:32467000-32467500.wgt.RDat	chr14:32467000-32467500	14	32467000	32467500		rs944463	-2.134	rs9322887	0.0323	-1.456	0.3118	30	1	top1.qtl	0.4717	0.011	1.32584	0.185
analysis/predict/WEIGHTS//chr14:32883500-32883900.wgt.RDat	chr14:32883500-32883900	14	32883500	32883900		rs11625892	-1.643	rs17098990	0.188	-3.998	0.6321	33	1	top1	0.066	0.0018	-0.6321	0.527
analysis/predict/WEIGHTS//chr14:33136900-33137450.wgt.RDat	chr14:33136900-33137450	14	33136900	33137450		rs1028537	-1.5	rs1028537	0.124	-5.069	-1.5	25	1	top1	0.15	2.9e-06	1.5	0.134
analysis/predict/WEIGHTS//chr14:33801400-33802250.wgt.RDat	chr14:33801400-33802250	14	33801400	33802250		rs1111533	1.19	rs1315139	0.296	-1.767	0.5366	32	1	top1	0.2959	0.0043	-0.5366	0.592
analysis/predict/WEIGHTS//chr14:34005700-34006200.wgt.RDat	chr14:34005700-34006200	14	34005700	34006200		rs10146152	-1.61	rs4456406	0.238	2.765	-0.7471	43	1	top1.as	0.6244	0.0018	-0.94253	0.346
analysis/predict/WEIGHTS//chr14:34263450-34264050.wgt.RDat	chr14:34263450-34264050	14	34263450	34264050		rs2182440	3.043	rs2182440	-0.00481	-3.07	3.0431	24	7	lasso.plasma	0.044	0.0087	-1.65451	0.098
analysis/predict/WEIGHTS//chr14:34554150-34555000.wgt.RDat	chr14:34554150-34555000	14	34554150	34555000		rs4982138	2.366	rs17102182	-0.0393	2.475	-1.77	22	7	lasso.plasma	0.065	0.0019	-0.22499	0.822
analysis/predict/WEIGHTS//chr14:34672450-34673150.wgt.RDat	chr14:34672450-34673150	14	34672450	34673150		rs1244372	-2.106	rs1244349	0.0619	4.549	-0.4819	31	1	top1.qtl	0.181	2.2e-07	-0.48193	0.63
analysis/predict/WEIGHTS//chr14:34706250-34706750.wgt.RDat	chr14:34706250-34706750	14	34706250	34706750		rs1244372	-2.106	rs1244353	0.22	1.875	0	55	1	top1.as	0.5123	0.0022	1.18	0.238
analysis/predict/WEIGHTS//chr14:34712650-34713100.wgt.RDat	chr14:34712650-34713100	14	34712650	34713100		rs1244372	-2.106	rs12890960	0.044	-4.055	1.0108	57	1	top1	0.128	1.5e-05	-1.0108	0.312
analysis/predict/WEIGHTS//chr14:35670250-35670900.wgt.RDat	chr14:35670250-35670900	14	35670250	35670900		rs8005078	-1.444	rs8003136	0.178	-3.353	-1.3765	11	1	top1.as	0.189	0.012	1.37647	0.169
analysis/predict/WEIGHTS//chr14:35761250-35761800.wgt.RDat	chr14:35761250-35761800	14	35761250	35761800		rs2005535	1.301	rs2277461	-0.0492	1.125	1.041	19	1	top1.qtl	0.265	0.01	-0.20213	0.84
analysis/predict/WEIGHTS//chr14:35822900-35823600.wgt.RDat	chr14:35822900-35823600	14	35822900	35823600		rs7149937	-1.779	rs10147645	-0.0079	1.12	1.2968	23	1	top1.qtl	0.062	0.0023	0.74766	0.455
analysis/predict/WEIGHTS//chr14:36138900-36139550.wgt.RDat	chr14:36138900-36139550	14	36138900	36139550		rs4982303	1.085	rs7155504	0.0184	1.961	0.26	18	1	top1.qtl	0.048	0.0069	0.75	0.453
analysis/predict/WEIGHTS//chr14:37066950-37067450.wgt.RDat	chr14:37066950-37067450	14	37066950	37067450		rs7143398	5.889	rs730105	0.208	3.911	-0.562	31	1	top1	0.077	0.00077	-0.562	0.574
analysis/predict/WEIGHTS//chr14:37731850-37732300.wgt.RDat	chr14:37731850-37732300	14	37731850	37732300		rs1569899	-4.16	rs1569899	0.00975	1.48	-4.1605	15	1	top1.qtl	0.05	0.0056	-4.16049	3.18e-05
analysis/predict/WEIGHTS//chr14:38013500-38014050.wgt.RDat	chr14:38013500-38014050	14	38013500	38014050		rs1547009	-3.908	rs1956441	0.465	3.725	2.9012	20	1	top1.as	0.5048	0.0011	1.7625	0.078
analysis/predict/WEIGHTS//chr14:38699850-38700400.wgt.RDat	chr14:38699850-38700400	14	38699850	38700400		rs10498339	-3.986	rs2772134	-0.0287	1.407	-0.2593	29	1	top1	0.064	0.002	-0.2593	0.795
analysis/predict/WEIGHTS//chr14:38712800-38713650.wgt.RDat	chr14:38712800-38713650	14	38712800	38713650		rs10498339	-3.986	rs12894572	0.0645	1.249	1.6739	24	1	top1.as	0.111	0.014	-1.39362	0.163
analysis/predict/WEIGHTS//chr14:39493200-39493850.wgt.RDat	chr14:39493200-39493850	14	39493200	39493850		rs17108729	-1.543	rs8018842	-0.00125	-1.965	-1.3299	22	1	top1.qtl	0.054	0.0043	1.3299	0.184
analysis/predict/WEIGHTS//chr14:40094500-40095000.wgt.RDat	chr14:40094500-40095000	14	40094500	40095000		rs17092077	-1.246	rs11157080	0.171	5.32	0.0889	14	1	top1	0.2	6.7e-08	0.0889	0.929
analysis/predict/WEIGHTS//chr14:41828700-41829600.wgt.RDat	chr14:41828700-41829600	14	41828700	41829600		rs7141179	-0.907	rs8011757	-0.0533	3.452	0.2444	21	2	lasso.plasma	0.0423	0.01	0.309146	0.757
analysis/predict/WEIGHTS//chr14:41991050-41991550.wgt.RDat	chr14:41991050-41991550	14	41991050	41991550		rs862476	-0.714	rs9285572	0.0382	-2.725	-0.6429	9	1	top1	0.039	0.013	0.6429	0.52
analysis/predict/WEIGHTS//chr14:42370250-42370750.wgt.RDat	chr14:42370250-42370750	14	42370250	42370750		rs1951884	-0.798	rs7148658	0.344	-2.91	0.2941	9	4	lasso.as	0.3687	0.0026	-0.9474	0.343
analysis/predict/WEIGHTS//chr14:42394700-42395450.wgt.RDat	chr14:42394700-42395450	14	42394700	42395450		rs7359059	1.461	rs4513003	0.0758	-1.327	0.4419	11	1	top1.qtl	0.045	0.0084	-0.72727	0.467
analysis/predict/WEIGHTS//chr14:42743700-42744200.wgt.RDat	chr14:42743700-42744200	14	42743700	42744200		rs2129075	1.83	rs1393840	0.252	-2.147	0.7412	18	1	top1.qtl	0.05	0.0057	-0.74118	0.459
analysis/predict/WEIGHTS//chr14:44371000-44372050.wgt.RDat	chr14:44371000-44372050	14	44371000	44372050		rs12435541	-0.869	rs17278600	-0.0761	-1.312	0.1593	15	1	top1	0.039	0.014	-0.1593	0.873
analysis/predict/WEIGHTS//chr14:44479200-44479700.wgt.RDat	chr14:44479200-44479700	14	44479200	44479700		rs12433473	1.185	rs11849451	0.0414	3.188	-0.4321	18	1	top1	0.046	0.0077	-0.4321	0.666
analysis/predict/WEIGHTS//chr14:46175150-46175650.wgt.RDat	chr14:46175150-46175650	14	46175150	46175650		rs983943	1.881	rs1906811	0.000788	-1.101	-0.1981	21	1	top1.as	0.06602	0.0017	-0.15	0.881
analysis/predict/WEIGHTS//chr14:50417600-50418000.wgt.RDat	chr14:50417600-50418000	14	50417600	50418000		rs17121925	-3.313	rs941606	0.105405	2.614	-0.5244	26	3	lasso	0.07	0.0013	0.0385	0.969
analysis/predict/WEIGHTS//chr14:50467600-50468350.wgt.RDat	chr14:50467600-50468350	14	50467600	50468350		rs17252094	-2.409	rs3861492	0.00959	2.052	-2.2614	38	1	top1.as	0.271	0.0077	0.27586	0.783
analysis/predict/WEIGHTS//chr14:50699750-50700500.wgt.RDat	chr14:50699750-50700500	14	50699750	50700500		rs8017367	-1.413	rs8017367	0.112853	3.823	-1.413	16	3	lasso	0.066	0.0017	-0.5355	0.592
analysis/predict/WEIGHTS//chr14:50866300-50867250.wgt.RDat	chr14:50866300-50867250	14	50866300	50867250		rs8005104	-3.45	rs17717642	0.122	4.266	-1.2046	26	1	top1	0.12	2.1e-05	-1.2046	0.228
analysis/predict/WEIGHTS//chr14:51134800-51135400.wgt.RDat	chr14:51134800-51135400	14	51134800	51135400		rs6572681	-3.264	rs2356457	-0.0236	2.271	-0.9765	15	1	top1.qtl	0.039	0.013	-0.97647	0.329
analysis/predict/WEIGHTS//chr14:51199900-51200600.wgt.RDat	chr14:51199900-51200600	14	51199900	51200600		rs2073349	4.798	rs9323192	-0.00368	-2.299	0.0303	29	1	top1.qtl	0.057	0.0035	-0.0303	0.976
analysis/predict/WEIGHTS//chr14:51229950-51230850.wgt.RDat	chr14:51229950-51230850	14	51229950	51230850		rs10483610	4.804	rs1014990	0.127	-1.886	-1.8485	34	1	top1	0.1272	0.0041	1.8485	0.0645
analysis/predict/WEIGHTS//chr14:51734300-51734850.wgt.RDat	chr14:51734300-51734850	14	51734300	51734850		rs4901097	-1.305	rs4566067	0.411	-6.47	-1.2117	23	6	lasso.plasma	0.29	1.4e-11	1.14233	0.253
analysis/predict/WEIGHTS//chr14:52013800-52014400.wgt.RDat	chr14:52013800-52014400	14	52013800	52014400		rs2064923	-1.79	rs8013974	0.113	3.927	0.3913	37	1	top1.qtl	0.151	0.0049	0.3913	0.696
analysis/predict/WEIGHTS//chr14:52469800-52470800.wgt.RDat	chr14:52469800-52470800	14	52469800	52470800		rs1476284	-1.517	rs6572807	0.134	2.826	-0.9022	31	1	top1	0.1339	0.015	-0.9022	0.367
analysis/predict/WEIGHTS//chr14:52818200-52818700.wgt.RDat	chr14:52818200-52818700	14	52818200	52818700		rs1995009	-1.688	rs1992139	-0.0771	-1.804	-1.4078	29	2	lasso.as	0.044	0.0091	0.4455	0.656
analysis/predict/WEIGHTS//chr14:53311150-53311750.wgt.RDat	chr14:53311150-53311750	14	53311150	53311750		rs17694496	-8.059	rs12586707	0.111	-3.777	3.7778	15	1	top1.as	0.51	0.0053	-3.77778	0.000158
analysis/predict/WEIGHTS//chr14:53319550-53320200.wgt.RDat	chr14:53319550-53320200	14	53319550	53320200		rs17694496	-8.059	rs3818453	0.144	-2.366	3.8032	15	1	top1.qtl	0.5265	0.0027	-3.80315	0.000143
analysis/predict/WEIGHTS//chr14:53470700-53471250.wgt.RDat	chr14:53470700-53471250	14	53470700	53471250		rs7153163	-5.625	rs12431981	0.125	3.621	-5.2875	28	1	lasso.plasma	0.167	0.0028	-5.2875	1.24e-07
analysis/predict/WEIGHTS//chr14:55737900-55738250.wgt.RDat	chr14:55737900-55738250	14	55737900	55738250		rs17672950	-3.531	rs2880103	0.1	0.997	-0.1176	10	1	top1.as	0.192	0.012	-1.90244	0.0571
analysis/predict/WEIGHTS//chr14:55811400-55811900.wgt.RDat	chr14:55811400-55811900	14	55811400	55811900		rs17673930	-3.517	rs2297816	-0.0443	3.798	-0.1412	18	1	top1.qtl	0.113	4.7e-05	3.51701	0.000436
analysis/predict/WEIGHTS//chr14:56298800-56299250.wgt.RDat	chr14:56298800-56299250	14	56298800	56299250		rs8011441	-2.663	rs1953358	0.047	4.591	-2.4823	30	11	lasso.plasma	0.12	1.9e-05	-1.6682	0.0953
analysis/predict/WEIGHTS//chr14:56686600-56687050.wgt.RDat	chr14:56686600-56687050	14	56686600	56687050		rs17832675	-0.731	rs754689	0.151	-3.36	-0.4444	42	1	top1	0.151	0.0071	0.4444	0.657
analysis/predict/WEIGHTS//chr14:57073400-57074000.wgt.RDat	chr14:57073400-57074000	14	57073400	57074000		rs8012000	-2.603	rs2151774	-0.011409	-2.721	1.069	28	7	lasso	0.044	0.0094	-1.2201	0.222
analysis/predict/WEIGHTS//chr14:57149850-57150350.wgt.RDat	chr14:57149850-57150350	14	57149850	57150350		rs2345114	2.651	rs2149768	0.131	-0.971	-0.4111	30	1	top1.as	0.0483	0.0065	-2.37838	0.0174
analysis/predict/WEIGHTS//chr14:57168650-57169100.wgt.RDat	chr14:57168650-57169100	14	57168650	57169100		rs4898914	-2.449	rs198257	0.0761	1.971	-0.0444	34	1	top1.as	0.2964	0.0095	-1.33019	0.183
analysis/predict/WEIGHTS//chr14:59655250-59655800.wgt.RDat	chr14:59655250-59655800	14	59655250	59655800		rs17095853	1.545	rs1152566	-0.0446	2.581	0.6018	22	1	top1	0.05	0.0059	0.6018	0.547
analysis/predict/WEIGHTS//chr14:60435450-60436600.wgt.RDat	chr14:60435450-60436600	14	60435450	60436600		rs219315	-0.882	rs219354	0.0128	3.913	-0.7563	15	1	top1.as	0.1173	3.5e-05	-0.7563	0.449
analysis/predict/WEIGHTS//chr14:61153500-61154100.wgt.RDat	chr14:61153500-61154100	14	61153500	61154100		rs11158297	3.106	rs10139853	0.098614	-4.717	2.9121	14	5	lasso	0.111	5.5e-05	-2.1824	0.0291
analysis/predict/WEIGHTS//chr14:61328750-61329500.wgt.RDat	chr14:61328750-61329500	14	61328750	61329500		rs12587061	2.478	rs6573333	0.241	-1.151	1.7125	11	1	top1.as	0.5164	0.00019	0.55294	0.58
analysis/predict/WEIGHTS//chr14:61876450-61877100.wgt.RDat	chr14:61876450-61877100	14	61876450	61877100		rs1536014	-2.575	rs4902052	0.177	-1.147	0.2381	31	1	top1.as	0.25	0.0013	0.09278	0.926
analysis/predict/WEIGHTS//chr14:62105400-62106250.wgt.RDat	chr14:62105400-62106250	14	62105400	62106250		rs7156083	0.849	rs710063	-0.0452	-2.782	0.3043	18	1	top1.qtl	0.066	0.0017	-0.30435	0.761
analysis/predict/WEIGHTS//chr14:62458700-62459100.wgt.RDat	chr14:62458700-62459100	14	62458700	62459100		rs9285590	1.762	rs12880914	-0.0277	1.317	-0.7204	29	1	top1.qtl	0.1	0.00011	1.2963	0.195
analysis/predict/WEIGHTS//chr14:63439000-63439500.wgt.RDat	chr14:63439000-63439500	14	63439000	63439500		rs4902195	1.741	rs1268641	0.0818	4.476	-0.2472	26	1	top1	0.152	2.2e-06	-0.2472	0.805
analysis/predict/WEIGHTS//chr14:64389800-64390200.wgt.RDat	chr14:64389800-64390200	14	64389800	64390200		rs2150288	2.037	rs11621026	0.122	-2.772	1.3691	27	5	lasso.as	0.039	0.013	-0.9003	0.368
analysis/predict/WEIGHTS//chr14:64549550-64550150.wgt.RDat	chr14:64549550-64550150	14	64549550	64550150		rs10136783	2.436	rs8022428	-0.0247	1.536	0.6696	26	5	lasso.as	0.462	0.0087	-1.9175	0.0552
analysis/predict/WEIGHTS//chr14:64981600-64982550.wgt.RDat	chr14:64981600-64982550	14	64981600	64982550		rs11625265	1.368	rs2057130	0.0493	-1.535	-1.0482	22	1	top1.as	0.1384	0.015	1.27586	0.202
analysis/predict/WEIGHTS//chr14:65562200-65562900.wgt.RDat	chr14:65562200-65562900	14	65562200	65562900		rs942629	-1.698	rs12880781	0.0288	-1.191	-0.8539	18	1	top1	0.037	0.015	0.8539	0.393
analysis/predict/WEIGHTS//chr14:65571250-65571750.wgt.RDat	chr14:65571250-65571750	14	65571250	65571750		rs1124752	-1.395	rs1271582	0.392	4.647	-1.1279	12	1	top1	0.11	4.7e-05	-1.1279	0.259
analysis/predict/WEIGHTS//chr14:65635650-65636100.wgt.RDat	chr14:65635650-65636100	14	65635650	65636100		rs8020475	2.476	rs17826026	0.0216	1.305	2.045	29	1	top1	0.066	0.0018	2.045	0.0408
analysis/predict/WEIGHTS//chr14:68056000-68056500.wgt.RDat	chr14:68056000-68056500	14	68056000	68056500		rs4899212	2.34	rs12323371	0.071	-1.66	-0.4623	33	1	top1.qtl	0.06	0.0026	-1.45455	0.146
analysis/predict/WEIGHTS//chr14:68631350-68632350.wgt.RDat	chr14:68631350-68632350	14	68631350	68632350		rs2331648	1.11	rs2331648	0.143	1.247	1.1101	15	1	top1.as	0.40549	0.00082	1.11009	0.267
analysis/predict/WEIGHTS//chr14:68641400-68642000.wgt.RDat	chr14:68641400-68642000	14	68641400	68642000		rs2331648	1.11	rs2588821	-0.0245	-2.011	0.3796	16	1	top1.qtl	0.4551	0.0094	-0.44144	0.659
analysis/predict/WEIGHTS//chr14:68942350-68943000.wgt.RDat	chr14:68942350-68943000	14	68942350	68943000		rs12886864	-4.878	rs2525507	-0.0179	1.079	2.1961	18	1	top1.qtl	0.4731	0.0077	-2.92857	0.00341
analysis/predict/WEIGHTS//chr14:69029950-69030500.wgt.RDat	chr14:69029950-69030500	14	69029950	69030500		rs7146456	5.25	rs4902602	0.138051	-2.271	-0.8049	38	3	lasso	0.066	0.0017	-1.5917	0.111
analysis/predict/WEIGHTS//chr14:69404500-69405200.wgt.RDat	chr14:69404500-69405200	14	69404500	69405200		rs7144460	-4.612	rs10147838	-0.0104	-1.572	-0.5976	32	1	top1	0.05	0.0058	0.5976	0.55
analysis/predict/WEIGHTS//chr14:69809350-69810250.wgt.RDat	chr14:69809350-69810250	14	69809350	69810250		rs1298730	-2.272	rs12879377	0.0047	-2.005	1.7024	35	1	top1.as	0.0892	0.014	0.50575	0.613
analysis/predict/WEIGHTS//chr14:70206100-70206650.wgt.RDat	chr14:70206100-70206650	14	70206100	70206650		rs1275828	-0.963	rs11629054	0.435	-4.451	-0.6186	11	1	top1	0.435	0.00048	0.6186	0.536
analysis/predict/WEIGHTS//chr14:70514450-70515300.wgt.RDat	chr14:70514450-70515300	14	70514450	70515300		rs227434	-2.235	rs17107695	0.029062	3.937	-0.3824	42	6	lasso	0.134	9.1e-06	-0.1118	0.911
analysis/predict/WEIGHTS//chr14:70534450-70535000.wgt.RDat	chr14:70534450-70535000	14	70534450	70535000		rs227434	-2.235	rs150946	0.0776	3.264	-0.9012	44	1	top1	0.069	0.0013	-0.9012	0.367
analysis/predict/WEIGHTS//chr14:70833650-70834150.wgt.RDat	chr14:70833650-70834150	14	70833650	70834150		rs3759774	-4.418	rs3759774	0.003005	2.956	-4.4177	26	1	lasso	0.2674	0.0068	-2.8993	0.00374
analysis/predict/WEIGHTS//chr14:71529450-71530100.wgt.RDat	chr14:71529450-71530100	14	71529450	71530100		rs7152845	-1.247	rs11848070	-0.0588	-0.617	0.732	10	1	top1.qtl	0.064	0.0019	-0.67143	0.502
analysis/predict/WEIGHTS//chr14:72425700-72426250.wgt.RDat	chr14:72425700-72426250	14	72425700	72426250		rs4899409	1.963	rs2238280	0.105	3.13	1.5745	26	13	lasso.as	0.56	0.00012	1.0438	0.297
analysis/predict/WEIGHTS//chr14:72595850-72596400.wgt.RDat	chr14:72595850-72596400	14	72595850	72596400		rs10142058	-2.988	rs2190631	0.339	-3.497	0.5905	25	1	top1	0.339	0.0067	-0.5905	0.555
analysis/predict/WEIGHTS//chr14:73705250-73705700.wgt.RDat	chr14:73705250-73705700	14	73705250	73705700		rs12895249	-2.53	rs165935	0.214	-1.616	0.5696	32	1	top1.as	0.2368	0.0051	-1.88571	0.0593
analysis/predict/WEIGHTS//chr14:73957350-73957900.wgt.RDat	chr14:73957350-73957900	14	73957350	73957900		rs12897861	-2.379	rs1014087	0.211	2.735	1.3077	29	1	top1.as	0.3232	0.0082	1.30769	0.191
analysis/predict/WEIGHTS//chr14:74178700-74179000.wgt.RDat	chr14:74178700-74179000	14	74178700	74179000		rs2075026	1.311	rs2075026	-0.0412	2.226	1.3111	21	4	lasso.as	0.4068	0.00061	1.3965	0.163
analysis/predict/WEIGHTS//chr14:74353100-74353750.wgt.RDat	chr14:74353100-74353750	14	74353100	74353750		rs10483857	-2.079	rs17182656	-0.00232	-2.812	0.1607	22	5	lasso.plasma	0.209	0.005	0.074561	0.941
analysis/predict/WEIGHTS//chr14:75567200-75568700.wgt.RDat	chr14:75567200-75568700	14	75567200	75568700		rs175450	-1.696	rs96358	-0.0104	-1.439	-1.6296	19	1	top1.qtl	0.055	0.004	1.28049	0.2
analysis/predict/WEIGHTS//chr14:75627150-75627600.wgt.RDat	chr14:75627150-75627600	14	75627150	75627600		rs175435	-1.759	rs2098297	0.284	2.845	-1.0886	9	1	top1.qtl	0.3114	0.012	-1.02532	0.305
[truncated: 3,951 more rows]

## Sheet: Table S4
Table S4. Integrative genetic models of H3K27ac
[truncated: 17,200 more rows]

[truncated: 6 more sheets: Table S5, Table S6, Table S7, Table S8, Table S9, Table S10]
